# Supplementary material for: Preliminary report of honeybee physiological changes pre- and post-hybrid lavender season in high and low weight gain colonies
Source: Springer Nature journal article supplement (doi:10.1007/s13592-020-00835-5), 2021-02-03
Supplement: MOESM1 [file 13592_2020_835_MOESM1_ESM.pdf]

## Online Resources 1

**Article title:**

**Preliminary report on honeybee physiological changes pre- and post-hybrid lavender season in high and low weight-gain colonies**

**Journal name:**

APIDOLOGIE

**Authors names:**

Claudia Dussaubat<sup>1,2,3,4</sup>, Alban Maisonnasse<sup>1,3,5</sup>, Luc P. Belzunces<sup>1,3</sup>, Jean-Luc Brunet<sup>1,3</sup>, André Kretzschmar<sup>2,3</sup>

**Affiliations :**

<sup>1</sup>INRAE, UR 406 Abeilles et environnement, 84914, Avignon, France.

<sup>2</sup>INRAE, UR 546 Biostatistique et Processus Spatiaux, 84914, Avignon, France.

<sup>3</sup>UMT PrADE, Site Agroparc, CS 40509, Avignon, France.

<sup>4</sup>Independent Consultant, 84140, Avignon, France & Valdivia, Chile.

<sup>5</sup>ADAPI (Association pour le développement de l'Apiculture), 22, Avenue Henri Pontier, 13326, Aix en Provence Cedex 1, France.

**Corresponding author:** Claudia Dussaubat, e-mail: [cdussaubat@yahoo.com](mailto:cdussaubat@yahoo.com).

**(a) GPS coordinates of apiary sites**

| Year | Productive area                 | Lat. North  | Long. Est  | Apiary Code |
|------|---------------------------------|-------------|------------|-------------|
| 2013 | Drôme valley                    | 44°25'40"   | 4°54'35"   | B13         |
|      |                                 | 44°25'44"   | 4°57'30"   | L13         |
|      | Valensole plateau               | 43°48'34.1" | 6°10'00.4" | P13         |
|      |                                 | 43°53'50.6" | 6°04'54.7" | X13         |
|      | Albion plateau/Mountain of Lure | 43°55'59.2" | 5°38'43.6" | T13         |
|      |                                 | 44°02'56.9" | 5°38'37.7" | Z13         |
| 2014 | Drôme valley                    | 44°25'15.5" | 4°47'59.0" | E14         |
|      |                                 | 44°21'09.4" | 5°01'34.9" | G14         |
|      | Valensole plateau               | 43°58'44"   | 6°01'33"   | M14         |
|      |                                 | 43°48'34.1" | 6°10'00.4" | P14         |
|      | Albion plateau/Mountain of Lure | 44°06'04.5" | 5°31'10.9" | K14         |
|      |                                 | 44°02'56.9" | 5°38'37.7" | Z14         |

**(b) Sites positions**

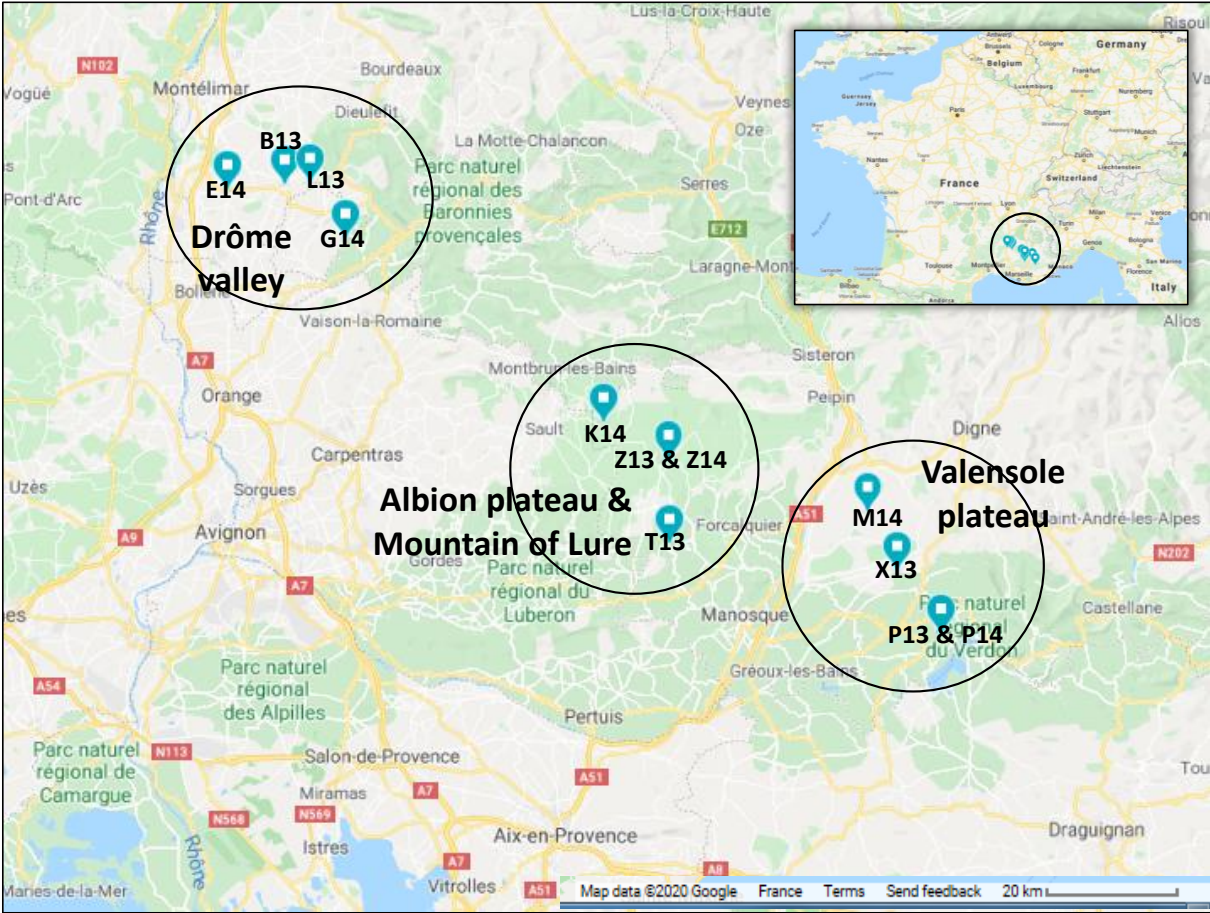

Note : see table “GPS coordinates of apiary sites” page 2 for apiary codes and years.

(c) Picture 1: Scale used for weight gain measures.

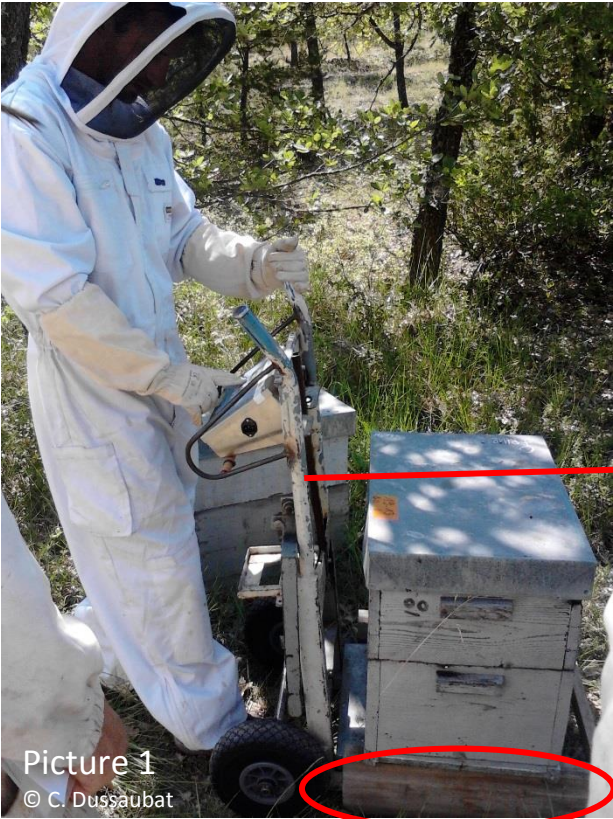

Pallet lifter with electronic scale

Individual pallet

(d) Picture 2: Colonies on pallets.

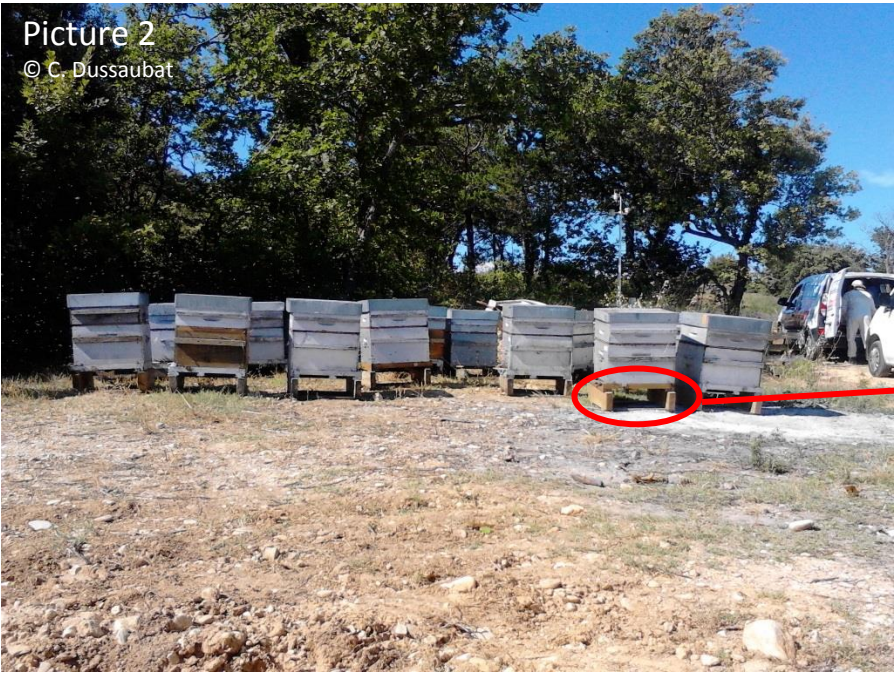

Individual pallet

**(e) Dispersion of colony weight gain (kg) in weight gain classes**

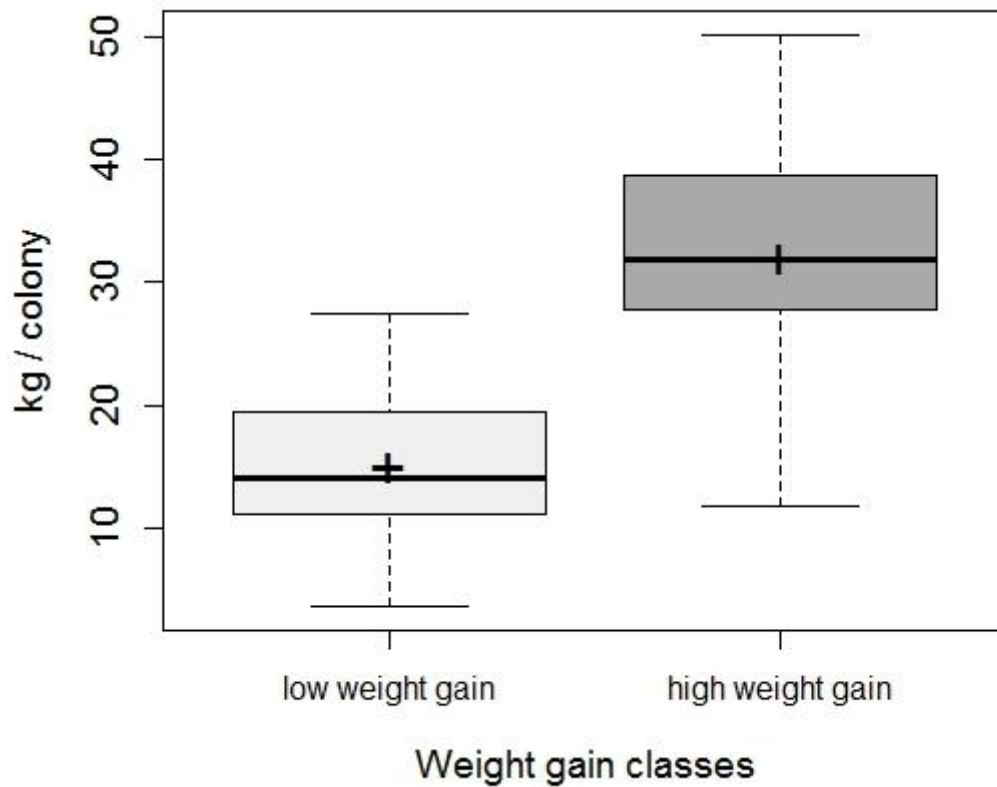

Boxplots show 1<sup>st</sup> and 3<sup>rd</sup> interquartile range with line denoting median and plus sign denoting mean, whiskers encompass 90% of 120 colonies beyond which outliers are represented by circles.
