# Supplementary material for: Preliminary report of honeybee physiological changes pre- and post-hybrid lavender season in high and low weight gain colonies
Source: Springer Nature journal article supplement (doi:10.1007/s13592-020-00835-5), 2021-02-03
Supplement: MOESM2 [file 13592_2020_835_MOESM2_ESM.pdf]

## ONLINE RESOURCES 2 - DATASET

**Article name:** Preliminary report on honeybee physiological changes pre- and post-hybrid lavender season in high and low weight-gain colonies.

**Journal name:** Apidologie

**Author names:** Claudia Dussaubat<sup>1,2,3,4</sup>, Alban Maisonnasse<sup>1,3,5</sup>, Luc P. Belzunces<sup>1,3</sup>, Jean-Luc Brunet<sup>1,3</sup>, André Kretzschmar<sup>2,3</sup>

**Affiliation:** <sup>1</sup>INRAE, UR 406 Abeilles et environnement, 84914, Avignon, France.

<sup>2</sup>INRAE, UR 546 Biostatistique et Processus Spatiaux, 84914, Avignon, France.

<sup>3</sup>UMT PrADE, Site Agroparc, CS 40509, Avignon, France.

<sup>4</sup>Independent Consultant, 84140, Avignon, France & Valdivia, Chile.

<sup>5</sup>ADAPI (Association pour le développement de l'Apiculture), 22, Avenue Henri Pontier, 13326, Aix en Provence Cedex 1, France.

**Corresponding author:** Claudia Dussaubat, e-mail: cdussaubat@yahoo.com

List of Dataset column titles and meaning:

Original column title      Meaning (names as in the article)

Annee:                      Year                                      acheT:              AchE-head

Zone:                        Region                                    catT:                CAT-head

Cru:                          Apiary code                            gpT:                 GP-head

nomRucher:                Apiary name                           sodT:                SOD-head

Ruche:                      Colony number                        catI:                CAT-midgut

Date: Time points        J0: PRE                                sodI:                SOD-midgut

J30: POST                              pall:                 AP-midgut

force:                        fort: HIGH

faible: LOW

| Annee | Zone  | Cru  | nomRucher | Ruche | Date | weight_gain | force  | acheT      | catT      | gpT     | sodT      | catI       | sodI      | pall     |
|-------|-------|------|-----------|-------|------|-------------|--------|------------|-----------|---------|-----------|------------|-----------|----------|
| 2013  | Drome | DB13 | Grignan   | 7     | JO   | NA          | faible | 111,994506 | 74,91429  | 5,38782 | 101,50549 | 1219,70762 | 107,91941 | 9,84478  |
| 2013  | Drome | DB13 | Grignan   | 7     | JO   | NA          | faible | 95,464286  | 62,57363  | 5,47827 | 97,75092  | 541,21444  | 115,57875 | 9,02518  |
| 2013  | Drome | DB13 | Grignan   | 7     | JO   | NA          | faible | 101,869964 | 66,01172  | 5,41735 | 96,73260  | 556,68997  | 106,36264 | 9,69460  |
| 2013  | Drome | DB13 | Grignan   | 7     | JO   | NA          | faible | 109,45696  | 33,83516  | 6,20879 | 110,84432 | 651,68224  | 123,41026 | 7,75137  |
| 2013  | Drome | DB13 | Grignan   | 7     | JO   | NA          | faible | 87,639194  | 37,62637  | 4,12766 | 95,25275  | 587,36621  | 73,68681  | 6,48008  |
| 2013  | Drome | DB13 | Grignan   | 7     | JO   | NA          | faible | 117,446886 | 37,96484  | 6,06490 | 113,15018 | 714,76776  | 129,09524 | 8,93086  |
| 2013  | Drome | DB13 | Grignan   | 7     | JO   | NA          | faible | 97,858058  | 32,13187  | 5,15430 | 98,90110  | 562,93259  | 119,09890 | 10,60348 |
| 2013  | Drome | DB13 | Grignan   | 7     | JO   | NA          | faible | 89,37912   | 47,40659  | 4,10199 | 107,78388 | 891,92347  | 116,10623 | 8,86310  |
| 2013  | Drome | DB13 | Grignan   | 7     | JO   | NA          | faible | 83,653846  | 55,21758  | NA      | 111,87912 | 571,57625  | 123,83883 | 8,04808  |
| 2013  | Drome | DB13 | Grignan   | 7     | JO   | NA          | faible | 93,962454  | 54,60366  | 5,99428 | 106,96337 | 446,91961  | 126,60806 | 8,94918  |
| 2013  | Drome | DB13 | Grignan   | 9     | JO   | NA          | faible | 138,374542 | 54,69011  | 8,79991 | 146,92674 | 970,35659  | 117,30769 | 8,50870  |
| 2013  | Drome | DB13 | Grignan   | 9     | JO   | NA          | faible | 136,014652 | 42,66593  | NA      | 121,02564 | 1171,62374 | 121,04029 | 8,60073  |
| 2013  | Drome | DB13 | Grignan   | 9     | JO   | NA          | faible | 127,128206 | 52,34945  | 6,65385 | 124,32601 | 936,25198  | 120,18681 | 8,77610  |
| 2013  | Drome | DB13 | Grignan   | 9     | JO   | NA          | faible | 136,682234 | 72,35604  | 8,18407 | 152,67399 | 427,92154  | 128,81319 | 9,32418  |
| 2013  | Drome | DB13 | Grignan   | 9     | JO   | NA          | faible | 136,545788 | 77,11209  | 9,17445 | 148,11722 | 897,32595  | 116,71795 | 7,36630  |
| 2013  | Drome | DB13 | Grignan   | 9     | JO   | NA          | faible | 120,992674 | 29,98681  | 6,95982 | 131,22711 | 715,74037  | 131,20513 | 9,04167  |
| 2013  | Drome | DB13 | Grignan   | 9     | JO   | NA          | faible | 133,03022  | 82,42784  | NA      | 141,71429 | 1022,69484 | 125,38462 | 8,03663  |
| 2013  | Drome | DB13 | Grignan   | 9     | JO   | NA          | faible | 135,667582 | 48,67473  | 7,70673 | 139,45788 | 747,42618  | 123,56410 | 8,54464  |
| 2013  | Drome | DB13 | Grignan   | 9     | JO   | NA          | faible | 141,839744 | 53,91941  | 8,78091 | 154,45788 | 153,50999  | 117,16850 | 9,33242  |
| 2013  | Drome | DB13 | Grignan   | 9     | JO   | NA          | faible | 143,550366 | 55,48132  | 7,77679 | 139,25641 | 868,47591  | 121,06227 | 9,68727  |
| 2013  | Drome | DB13 | Grignan   | 2     | JO   | NA          | faible | 63,62912   | 31,93846  | 5,85302 | 114,72894 | 654,97853  | 129,60073 | 8,99817  |
| 2013  | Drome | DB13 | Grignan   | 2     | JO   | NA          | faible | 64,031136  | 94,16117  | NA      | 116,77656 | 1313,81416 | 136,06960 | 10,08517 |
| 2013  | Drome | DB13 | Grignan   | 2     | JO   | NA          | faible | 52,832418  | 86,25201  | 5,93750 | 112,94139 | 627,23994  | 116,67766 | 7,83310  |
| 2013  | Drome | DB13 | Grignan   | 2     | JO   | NA          | faible | 87,868132  | 101,65128 | 7,01007 | 121,15751 | 327,65910  | 130,52015 | 12,13004 |
| 2013  | Drome | DB13 | Grignan   | 2     | JO   | NA          | faible | 117,929488 | 96,76190  | NA      | 133,24176 | 1063,51828 | 137,26374 | 11,58929 |
| 2013  | Drome | DB13 | Grignan   | 2     | JO   | NA          | faible | 112,604396 | 107,05788 | NA      | 127,21612 | 1196,35905 | 135,16117 | 10,34547 |
| 2013  | Drome | DB13 | Grignan   | 2     | JO   | NA          | faible | 111,467032 | 97,34945  | 6,77541 | 110,85348 | 573,27655  | 125,24176 | 9,52335  |
| 2013  | Drome | DB13 | Grignan   | 2     | JO   | NA          | faible | 100,801282 | 83,46960  | 6,42960 | 118,79487 | 942,75944  | 129,43590 | 13,86996 |
| 2013  | Drome | DB13 | Grignan   | 2     | JO   | NA          | faible | 115,499084 | 80,78095  | NA      | 109,41392 | 1083,72836 | 128,89377 | 6,40247  |
| 2013  | Drome | DB13 | Grignan   | 2     | JO   | NA          | faible | 118,437728 | 94,50549  | 7,27266 | 124,41026 | 881,84756  | 123,48352 | 8,55701  |
| 2013  | Drome | DB13 | Grignan   | 8     | JO   | NA          | faible | 107,216118 | 81,02711  | 6,24771 | 111,45421 | 512,95670  | 111,62271 | 11,03938 |
| 2013  | Drome | DB13 | Grignan   | 8     | JO   | NA          | faible | 112,003664 | 64,16557  | 7,28297 | 88,70696  | 460,62836  | 113,53846 | 8,14423  |
| 2013  | Drome | DB13 | Grignan   | 8     | JO   | NA          | faible | 102,080586 | 50,65201  | 7,53320 | 114,84249 | 893,86033  | 109,17216 | 6,84066  |
| 2013  | Drome | DB13 | Grignan   | 8     | JO   | NA          | faible | 108,09707  | 46,85055  | 5,69025 | 114,93407 | 1037,74192 | 109,99634 | 7,62729  |
| 2013  | Drome | DB13 | Grignan   | 8     | JO   | NA          | faible | 120,611722 | 63,03590  | 6,33860 | 108,04029 | 797,46048  | 118,40659 | 8,64698  |
| 2013  | Drome | DB13 | Grignan   | 8     | JO   | NA          | faible | 108,761904 | 49,70696  | 5,52976 | 106,72161 | 1181,90986 | 115,42491 | 10,28343 |
| 2013  | Drome | DB13 | Grignan   | 8     | JO   | NA          | faible | 111,320512 | 81,58828  | 4,66712 | 113,52015 | 855,17209  | 127,98168 | 10,93223 |
| 2013  | Drome | DB13 | Grignan   | 8     | JO   | NA          | faible | 101,28663  | 64,94505  | 4,48317 | 123,27839 | 348,45799  | 118,43956 | 9,52381  |
| 2013  | Drome | DB13 | Grignan   | 8     | JO   | NA          | faible | 73,515568  | 83,42857  | 5,28205 | 110,30037 | 464,00588  | 119,55311 | 11,78800 |
| 2013  | Drome | DB13 | Grignan   | 8     | JO   | NA          | faible | 72,072344  | 46,34945  | 5,83700 | 104,96337 | 818,33007  | 118,43590 | 6,92354  |

|            |      |         |       |    |        |            |          |         |           |            |           |          |
|------------|------|---------|-------|----|--------|------------|----------|---------|-----------|------------|-----------|----------|
| 2013 Drome | DB13 | Grignan | 16 JO | NA | faible | 107,045788 | 45,14505 | 5,35142 | 102,20147 | 432,95020  | 103,37729 | 9,51648  |
| 2013 Drome | DB13 | Grignan | 16 JO | NA | faible | 82,319598  | 65,68059 | 5,21337 | 93,25641  | 908,45279  | 114,05128 | 8,60302  |
| 2013 Drome | DB13 | Grignan | 16 JO | NA | faible | 92,249084  | 79,07253 | 5,10577 | 110,12454 | 1134,53890 | 125,50916 | 11,58608 |
| 2013 Drome | DB13 | Grignan | 16 JO | NA | faible | 82,784798  | 84,28278 | 5,20948 | 101,01465 | 1233,69186 | 123,64835 | 7,73364  |
| 2013 Drome | DB13 | Grignan | 16 JO | NA | faible | 80,449634  | 60,64615 | 5,83951 | 114,06227 | 670,86378  | 115,87179 | 10,28617 |
| 2013 Drome | DB13 | Grignan | 16 JO | NA | faible | 83,759158  | 60,10696 | 5,87464 | 102,93407 | 998,55335  | 116,46154 | 10,98855 |
| 2013 Drome | DB13 | Grignan | 16 JO | NA | faible | 68,981684  | 76,72088 | 5,40865 | 122,89011 | 797,60577  | 122,00366 | 9,10852  |
| 2013 Drome | DB13 | Grignan | 16 JO | NA | faible | 54,27381   | 51,18462 | 6,14481 | 114,71062 | 765,39666  | 112,73626 | 8,97253  |
| 2013 Drome | DB13 | Grignan | 16 JO | NA | faible | 80,331502  | 65,35678 | 5,57040 | 99,44689  | 1072,03901 | 112,70330 | 8,73775  |
| 2013 Drome | DB13 | Grignan | 16 JO | NA | faible | 59,978022  | 51,58022 | 4,86058 | 107,73626 | 877,83897  | 121,50916 | 10,12683 |
| 2013 Drome | DB13 | Grignan | 17 JO | NA | forte  | 65,3663    | 90,33114 | 5,38507 | 120,52381 | 1457,45303 | 130,05861 | 15,55815 |
| 2013 Drome | DB13 | Grignan | 17 JO | NA | forte  | 67,66575   | 93,70330 | 6,25298 | 106,63004 | 495,56749  | 128,20513 | 9,76282  |
| 2013 Drome | DB13 | Grignan | 17 JO | NA | forte  | 51,42674   | 94,21758 | 6,40636 | 109,16117 | 1037,08306 | 132,51648 | 11,25092 |
| 2013 Drome | DB13 | Grignan | 17 JO | NA | forte  | 21,706044  | NA       | 2,34306 | 118,58608 | 914,81588  | 129,82418 | 10,31639 |
| 2013 Drome | DB13 | Grignan | 17 JO | NA | forte  | 98,682234  | 86,50403 | 5,60474 | 116,34432 | 1506,02030 | 121,05128 | 8,98008  |
| 2013 Drome | DB13 | Grignan | 17 JO | NA | forte  | 118,557692 | 78,51722 | 7,08310 | 105,27473 | 779,70368  | 123,01832 | 9,16026  |
| 2013 Drome | DB13 | Grignan | 17 JO | NA | forte  | 120,20055  | 78,18755 | 7,85211 | 113,96337 | 1576,95549 | 111,13919 | 13,51053 |
| 2013 Drome | DB13 | Grignan | 17 JO | NA | forte  | 108,386446 | 60,67839 | 7,06479 | 95,39560  | 1277,23153 | 114,82784 | 10,27610 |
| 2013 Drome | DB13 | Grignan | 17 JO | NA | forte  | 119,258242 | 76,23736 | 6,90625 | 76,80952  | 878,94726  | 120,16484 | NA       |
| 2013 Drome | DB13 | Grignan | 17 JO | NA | forte  | 105,312272 | 81,51648 | 5,19231 | 105,76190 | 862,30907  | 121,84615 | 9,33654  |
| 2013 Drome | DB13 | Grignan | 11 JO | NA | forte  | 47,621794  | 54,89011 | 5,04579 | 92,13919  | 927,92021  | 113,71062 | 13,36310 |
| 2013 Drome | DB13 | Grignan | 11 JO | NA | forte  | 66,442308  | 42,84689 | 6,78915 | 110,32967 | 954,15587  | 108,71429 | 14,00824 |
| 2013 Drome | DB13 | Grignan | 11 JO | NA | forte  | 25,42674   | 26,43956 | 3,23518 | 57,54579  | 910,33004  | 111,61538 | 10,83173 |
| 2013 Drome | DB13 | Grignan | 11 JO | NA | forte  | 49,69597   | 58,16703 | 6,07727 | 96,96337  | 741,95122  | 109,49451 | 9,34615  |
| 2013 Drome | DB13 | Grignan | 11 JO | NA | forte  | 59,106228  | 48,81319 | NA      | 114,81868 | 748,25856  | 113,28938 | 9,98901  |
| 2013 Drome | DB13 | Grignan | 11 JO | NA | forte  | 56,050366  | 53,54945 | 7,01545 | 113,77656 | 707,10226  | 113,67399 | 9,86996  |
| 2013 Drome | DB13 | Grignan | 11 JO | NA | forte  | 50,946886  | 65,55165 | 6,03984 | 103,25275 | 479,79876  | 111,30403 | 9,05723  |
| 2013 Drome | DB13 | Grignan | 11 JO | NA | forte  | 50,02381   | 45,63516 | 6,95169 | 118,52381 | 1248,98507 | 115,68498 | 15,00275 |
| 2013 Drome | DB13 | Grignan | 11 JO | NA | forte  | 79,151098  | 54,11429 | 5,81559 | 99,77656  | 1258,05968 | 120,20513 | 11,72871 |
| 2013 Drome | DB13 | Grignan | 11 JO | NA | forte  | 65,76282   | 76,58462 | 5,75458 | 105,28571 | 643,60646  | 112,31136 | 12,67353 |
| 2013 Drome | DB13 | Grignan | 18 JO | NA | forte  | 76,619964  | 49,61978 | 4,64881 | 84,86081  | 717,19484  | 122,86081 | 10,44185 |
| 2013 Drome | DB13 | Grignan | 18 JO | NA | forte  | 75,41575   | 49,05641 | 4,05804 | 92,75092  | 987,61915  | 127,63736 | 8,58745  |
| 2013 Drome | DB13 | Grignan | 18 JO | NA | forte  | 86,641942  | 45,96777 | 4,94505 | 96,76557  | 908,74240  | 134,63370 | 10,60394 |
| 2013 Drome | DB13 | Grignan | 18 JO | NA | forte  | 73,142858  | 48,67473 | 4,73077 | 92,46154  | 795,88556  | 129,87546 | 9,86813  |
| 2013 Drome | DB13 | Grignan | 18 JO | NA | forte  | 76,94414   | 37,83077 | 5,26058 | 95,64835  | 1128,36384 | 115,13919 | 7,04716  |
| 2013 Drome | DB13 | Grignan | 18 JO | NA | forte  | 73,979854  | 59,61026 | 4,94414 | 97,42857  | 1017,15649 | 129,65568 | NA       |
| 2013 Drome | DB13 | Grignan | 18 JO | NA | forte  | 90,111722  | 70,68132 | 5,66552 | 103,16850 | 964,53616  | 136,04396 | 8,05975  |
| 2013 Drome | DB13 | Grignan | 18 JO | NA | forte  | 96,990176  | 81,07399 | 5,82898 | 100,34432 | 1311,13854 | 127,00733 | 11,79396 |
| 2013 Drome | DB13 | Grignan | 18 JO | NA | forte  | 104,351648 | 53,75238 | NA      | 100,12637 | 979,76340  | 125,29670 | 11,58883 |
| 2013 Drome | DB13 | Grignan | 18 JO | NA | forte  | 106,061356 | NA       | 5,87523 | 103,06593 | 655,52133  | 108,73260 | 9,03800  |
| 2013 Drome | DB13 | Grignan | 13 JO | NA | forte  | 113,211538 | 41,35165 | 7,06181 | 118,93407 | 1381,25525 | 137,49084 | 10,14469 |

|            |      |           |       |    |        |            |          |         |           |            |           |          |
|------------|------|-----------|-------|----|--------|------------|----------|---------|-----------|------------|-----------|----------|
| 2013 Drome | DB13 | Grignan   | 13 JO | NA | forte  | 95,258242  | 32,56923 | 7,10348 | 118,91575 | 1170,49760 | 118,74359 | NA       |
| 2013 Drome | DB13 | Grignan   | 13 JO | NA | forte  | 114,142858 | 40,40586 | 7,10886 | 112,23077 | 718,64383  | 118,00366 | 10,09734 |
| 2013 Drome | DB13 | Grignan   | 13 JO | NA | forte  | 115,212454 | 45,50330 | 7,52106 | 129,27839 | 1108,11442 | 133,08791 | 8,41484  |
| 2013 Drome | DB13 | Grignan   | 13 JO | NA | forte  | 42,092032  | 37,23077 | 6,62958 | 120,98535 | 1314,35245 | 128,26007 | 8,60714  |
| 2013 Drome | DB13 | Grignan   | 13 JO | NA | forte  | 54,27381   | 46,69158 | 4,42010 | 94,56044  | 1949,95695 | 125,90476 | NA       |
| 2013 Drome | DB13 | Grignan   | 13 JO | NA | forte  | 50,781136  | NA       | 5,34043 | 92,79121  | 919,38862  | 106,94139 | 9,08379  |
| 2013 Drome | DB13 | Grignan   | 13 JO | NA | forte  | 22,821428  | 35,51429 | 3,21039 | 63,04945  | 766,93890  | 116,14652 | 8,36905  |
| 2013 Drome | DB13 | Grignan   | 13 JO | NA | forte  | 39,362638  | 36,28352 | 5,11326 | 95,22711  | 1016,87100 | 128,47253 | 8,68864  |
| 2013 Drome | DB13 | Grignan   | 13 JO | NA | forte  | 51,094322  | 32,80000 | 6,07944 | 100,36264 | 2102,57911 | 121,20513 | 10,79121 |
| 2013 Drome | DB13 | Grignan   | 14 JO | NA | forte  | 101,630952 | 18,48791 | 5,11573 | 88,34432  | 897,14506  | 102,03663 | 8,82601  |
| 2013 Drome | DB13 | Grignan   | 14 JO | NA | forte  | 67,497252  | 38,25641 | NA      | 79,42857  | 1441,68914 | 101,16117 | 10,92720 |
| 2013 Drome | DB13 | Grignan   | 14 JO | NA | forte  | 73,375458  | 50,23443 | NA      | 89,66300  | 1597,87651 | 120,69963 | 16,89769 |
| 2013 Drome | DB13 | Grignan   | 14 JO | NA | forte  | 76,934066  | 45,49158 | 5,15316 | 84,72894  | 1172,86934 | 98,87546  | 9,96016  |
| 2013 Drome | DB13 | Grignan   | 14 JO | NA | forte  | 57,684982  | 42,37656 | 3,78800 | 85,93223  | 1523,51198 | 105,26374 | 10,93819 |
| 2013 Drome | DB13 | Grignan   | 14 JO | NA | forte  | 92,648352  | 26,90989 | 5,91655 | 97,71429  | 1027,69025 | 114,60806 | 12,58448 |
| 2013 Drome | DB13 | Grignan   | 14 JO | NA | forte  | 56,467032  | 44,21099 | NA      | 91,23993  | 1470,23631 | NA        | NA       |
| 2013 Drome | DB13 | Grignan   | 14 JO | NA | forte  | 61,319598  | 36,28425 | 3,83677 | 86,52015  | 1574,72380 | 99,00733  | 10,85714 |
| 2013 Drome | DB13 | Grignan   | 14 JO | NA | forte  | 91,472528  | 56,19780 | 5,51133 | 97,54579  | 1356,19250 | 112,87912 | NA       |
| 2013 Drome | DB13 | Grignan   | 14 JO | NA | forte  | 108,685898 | 44,60000 | NA      | 95,06593  | 1643,35049 | 114,92674 | 13,10714 |
| 2013 Drome | DL13 | Taulignan | 13 JO | NA | faible | 86,819598  | 99,24835 | 5,27679 | 78,11355  | 1936,18827 | 116,95238 | 11,92995 |
| 2013 Drome | DL13 | Taulignan | 13 JO | NA | faible | 81,677656  | 44,25934 | 6,94986 | 111,63553 | 1625,70825 | 115,79487 | 8,35485  |
| 2013 Drome | DL13 | Taulignan | 13 JO | NA | faible | 90,848902  | 49,01978 | 6,56554 | 115,52564 | 1296,72115 | 123,16484 | 10,10714 |
| 2013 Drome | DL13 | Taulignan | 13 JO | NA | faible | 70,5174    | 70,37582 | 4,68510 | 93,39927  | 855,58181  | 109,69963 | 10,81044 |
| 2013 Drome | DL13 | Taulignan | 13 JO | NA | faible | 81,004578  | 74,04396 | 6,02379 | 86,58608  | 1245,03112 | 121,66300 | 10,38645 |
| 2013 Drome | DL13 | Taulignan | 13 JO | NA | faible | 102,137362 | 72,16410 | 6,24153 | 110,28938 | 1843,35408 | NA        | 12,05815 |
| 2013 Drome | DL13 | Taulignan | 13 JO | NA | faible | 97,710622  | 65,98388 | 5,70021 | 95,13553  | 1599,37512 | 116,87912 | 14,51740 |
| 2013 Drome | DL13 | Taulignan | 13 JO | NA | faible | 111,10989  | 70,57143 | 7,07898 | 113,12821 | 570,06939  | 117,18681 | 11,70261 |
| 2013 Drome | DL13 | Taulignan | 13 JO | NA | faible | 107,072344 | 53,69451 | 5,46451 | 86,18315  | 1374,94686 | 114,99634 | 8,82418  |
| 2013 Drome | DL13 | Taulignan | 13 JO | NA | faible | 103        | 61,51648 | 5,87386 | 99,23077  | 1307,82599 | 120,90110 | 14,15659 |
| 2013 Drome | DL13 | Taulignan | 17 JO | NA | faible | 87,04762   | 99,89158 | 5,84547 | 97,38828  | 2401,99320 | 119,30769 | 12,22070 |
| 2013 Drome | DL13 | Taulignan | 17 JO | NA | faible | 94,321428  | 60,07033 | 5,81662 | 105,82051 | 1010,49480 | 114,87546 | 9,39240  |
| 2013 Drome | DL13 | Taulignan | 17 JO | NA | faible | 94,40293   | 77,42418 | 6,12248 | 100,16300 | 781,38419  | 116,62637 | 12,37821 |
| 2013 Drome | DL13 | Taulignan | 17 JO | NA | faible | 91,98718   | 62,94652 | 6,16552 | 111,10623 | 1366,16008 | 107,39194 | 10,19918 |
| 2013 Drome | DL13 | Taulignan | 17 JO | NA | faible | 57,897436  | 65,52381 | 6,08700 | 112,74725 | 891,87591  | 122,29670 | 9,90293  |
| 2013 Drome | DL13 | Taulignan | 17 JO | NA | faible | 52,021062  | 70,39560 | 5,79556 | 107,84615 | 1480,67870 | 116,78755 | 8,53068  |
| 2013 Drome | DL13 | Taulignan | 17 JO | NA | faible | 52,65293   | 44,74725 | 6,71659 | 108,39560 | 1383,71263 | 105,54945 | 9,72436  |
| 2013 Drome | DL13 | Taulignan | 17 JO | NA | faible | 49,333334  | 94,27985 | 5,11793 | 90,20147  | 741,62429  | 104,90110 | 10,49634 |
| 2013 Drome | DL13 | Taulignan | 17 JO | NA | faible | 58,65293   | 73,93700 | 6,46177 | 108,30769 | 1149,54721 | 106,97070 | 11,28709 |
| 2013 Drome | DL13 | Taulignan | 17 JO | NA | faible | 55,223444  | 79,57070 | 5,62042 | 95,72894  | 1489,70722 | 112,44322 | 9,66896  |
| 2013 Drome | DL13 | Taulignan | 16 JO | NA | faible | 101,063186 | 76,14945 | 7,81342 | 111,45421 | 1167,19607 | 133,10256 | 14,90614 |
| 2013 Drome | DL13 | Taulignan | 16 JO | NA | faible | 97         | 65,88571 | 6,73838 | 88,70696  | 966,16187  | 120,31136 | 13,60211 |

|            |      |           |       |    |        |            |          |         |           |            |           |          |
|------------|------|-----------|-------|----|--------|------------|----------|---------|-----------|------------|-----------|----------|
| 2013 Drome | DL13 | Taulignan | 16 JO | NA | faible | 99,54945   | 83,14139 | 9,46154 | 114,84249 | 757,88447  | 133,37363 | 13,45788 |
| 2013 Drome | DL13 | Taulignan | 16 JO | NA | faible | 123,357142 | 73,68791 | 8,77919 | 114,93407 | 1057,70907 | 134,02198 | 11,74451 |
| 2013 Drome | DL13 | Taulignan | 16 JO | NA | faible | 123,453296 | 55,79560 | 8,56387 | 108,04029 | 1037,20468 | 130,46154 | 12,52701 |
| 2013 Drome | DL13 | Taulignan | 16 JO | NA | faible | 123,027472 | 64,26520 | 8,04911 | 106,72161 | 801,63668  | 131,24542 | 10,44185 |
| 2013 Drome | DL13 | Taulignan | 16 JO | NA | faible | 109,167582 | 54,25495 | 8,54281 | 113,52015 | 1164,84172 | 132,71429 | 13,77060 |
| 2013 Drome | DL13 | Taulignan | 16 JO | NA | faible | 101,826924 | NA       | 8,79608 | 123,27839 | 1090,80582 | 131,30403 | 9,36035  |
| 2013 Drome | DL13 | Taulignan | 16 JO | NA | faible | 123,945054 | 85,26300 | 7,95158 | 110,30037 | 730,77132  | 123,32967 | 9,43498  |
| 2013 Drome | DL13 | Taulignan | 16 JO | NA | faible | 125,115384 | 64,68425 | 8,63507 | 111,98901 | 1105,45752 | 133,32234 | 10,27427 |
| 2013 Drome | DL13 | Taulignan | 9 JO  | NA | faible | 121,07967  | 68,61758 | 7,60405 | 102,20147 | 721,51397  | 137,43223 | 9,96612  |
| 2013 Drome | DL13 | Taulignan | 9 JO  | NA | faible | 134,782968 | 29,65495 | 6,92548 | 93,25641  | 1112,50478 | 130,16850 | 10,37454 |
| 2013 Drome | DL13 | Taulignan | 9 JO  | NA | faible | 118,873626 | 38,23516 | 8,49313 | 110,12454 | 1028,51370 | 128,78755 | 9,29304  |
| 2013 Drome | DL13 | Taulignan | 9 JO  | NA | faible | 116,25     | NA       | 8,65713 | 101,01465 | 1395,56576 | 128,65934 | 10,17399 |
| 2013 Drome | DL13 | Taulignan | 9 JO  | NA | faible | 146,802198 | 54,65934 | 8,03400 | 114,06227 | 775,39825  | 132,25641 | 9,95879  |
| 2013 Drome | DL13 | Taulignan | 9 JO  | NA | faible | 126,461538 | 26,39560 | 7,20467 | 102,93407 | 637,66686  | 140,91209 | 11,89148 |
| 2013 Drome | DL13 | Taulignan | 9 JO  | NA | faible | 157,956044 | 53,88718 | 7,63095 | 122,89011 | 746,39821  | 133,00733 | 13,32555 |
| 2013 Drome | DL13 | Taulignan | 9 JO  | NA | faible | 151,604396 | NA       | 8,79911 | 114,71062 | 558,07447  | 128,89744 | 7,77106  |
| 2013 Drome | DL13 | Taulignan | 9 JO  | NA | faible | 152,063186 | 35,12747 | NA      | 99,44689  | 274,62939  | 132,89011 | 9,16896  |
| 2013 Drome | DL13 | Taulignan | 9 JO  | NA | faible | 143,10989  | 51,55458 | 6,59650 | 107,73626 | 885,51114  | 134,44689 | 10,61813 |
| 2013 Drome | DL13 | Taulignan | 6 JO  | NA | faible | 138,593406 | 53,00879 | 9,12225 | 120,52381 | 1905,02280 | 148,19780 | 11,21772 |
| 2013 Drome | DL13 | Taulignan | 6 JO  | NA | faible | 123,78022  | 45,09451 | 7,59409 | 106,63004 | 818,76603  | 133,00000 | 8,26007  |
| 2013 Drome | DL13 | Taulignan | 6 JO  | NA | faible | 127,354396 | 73,76264 | 8,38736 | 109,16117 | 1315,66073 | 140,93040 | NA       |
| 2013 Drome | DL13 | Taulignan | 6 JO  | NA | faible | 133,035714 | 55,51795 | 8,83631 | 118,58608 | 1315,31594 | 145,95604 | 10,22047 |
| 2013 Drome | DL13 | Taulignan | 6 JO  | NA | faible | 107,68956  | 42,33553 | 8,10920 | 116,34432 | 1272,58140 | 143,33700 | 10,08562 |
| 2013 Drome | DL13 | Taulignan | 6 JO  | NA | faible | 91,483516  | 58,56996 | 7,64789 | 105,27473 | 1521,33288 | 145,87546 | 10,46429 |
| 2013 Drome | DL13 | Taulignan | 6 JO  | NA | faible | 99,016484  | 60,78681 | 9,05472 | 113,96337 | 795,80366  | 141,95604 | 9,39377  |
| 2013 Drome | DL13 | Taulignan | 6 JO  | NA | faible | 104,5      | 55,30769 | NA      | 95,39560  | 729,79446  | 129,81319 | 8,02799  |
| 2013 Drome | DL13 | Taulignan | 6 JO  | NA | faible | 63,991758  | 38,71868 | 4,55117 | 76,80952  | 1409,57398 | 144,98168 | 10,05449 |
| 2013 Drome | DL13 | Taulignan | 6 JO  | NA | faible | 89,192308  | 67,72454 | 8,04556 | 105,76190 | 1208,49749 | 140,90110 | 9,02198  |
| 2013 Drome | DL13 | Taulignan | 4 JO  | NA | forte  | 93,58608   | 40,13919 | 6,93979 | 107,88278 | 1107,29680 | 126,92674 | 8,59982  |
| 2013 Drome | DL13 | Taulignan | 4 JO  | NA | forte  | 122,672162 | 38,57143 | 6,91392 | 100,06227 | 900,03749  | 121,35531 | 11,07557 |
| 2013 Drome | DL13 | Taulignan | 4 JO  | NA | forte  | 141,792124 | 58,17363 | 7,13645 | 116,26557 | 1156,59463 | 110,01832 | 14,97898 |
| 2013 Drome | DL13 | Taulignan | 4 JO  | NA | forte  | 99,59066   | 28,83736 | 6,29853 | 116,50183 | 677,17657  | 121,84249 | 11,41758 |
| 2013 Drome | DL13 | Taulignan | 4 JO  | NA | forte  | 110,734432 | 18,00440 | 6,36012 | 116,22711 | 739,57969  | 116,06227 | 11,19918 |
| 2013 Drome | DL13 | Taulignan | 4 JO  | NA | forte  | 125,224358 | 38,62637 | 7,31525 | 119,11172 | 826,35748  | 119,74359 | 11,90064 |
| 2013 Drome | DL13 | Taulignan | 4 JO  | NA | forte  | 125,71978  | 36,27839 | 6,89835 | 124,68864 | 811,34187  | 106,06227 | 10,37912 |
| 2013 Drome | DL13 | Taulignan | 4 JO  | NA | forte  | 143,09249  | 54,46593 | 7,04373 | 131,66667 | 1181,41045 | 124,65568 | 12,72482 |
| 2013 Drome | DL13 | Taulignan | 4 JO  | NA | forte  | 92,662088  | NA       | 7,19803 | 120,32051 | 555,81197  | 127,01465 | 11,29670 |
| 2013 Drome | DL13 | Taulignan | 4 JO  | NA | forte  | 119,381868 | 58,26813 | 6,40007 | 120,44689 | 544,70139  | 112,10989 | 8,73901  |
| 2013 Drome | DL13 | Taulignan | 20 JO | NA | forte  | 88,74359   | 73,31282 | 5,44712 | 117,71062 | 814,35010  | 130,40659 | 10,72070 |
| 2013 Drome | DL13 | Taulignan | 20 JO | NA | forte  | 95,05586   | NA       | 6,52953 | 134,53846 | 751,63785  | 131,47985 | 9,29670  |
| 2013 Drome | DL13 | Taulignan | 20 JO | NA | forte  | 95,315934  | 83,09158 | 6,02198 | 112,42491 | 138,23090  | 125,32051 | 10,05723 |

|                 |      |           |       |    |        |            |           |          |           |            |           |          |
|-----------------|------|-----------|-------|----|--------|------------|-----------|----------|-----------|------------|-----------|----------|
| 2013 Drome      | DL13 | Taulignan | 20 JO | NA | forte  | 84,499084  | 66,51136  | 6,49382  | 113,83700 | 272,40686  | 123,59341 | 8,75687  |
| 2013 Drome      | DL13 | Taulignan | 20 JO | NA | forte  | 92,89011   | 74,95385  | 6,70734  | NA        | 414,30223  | 117,30952 | 9,52564  |
| 2013 Drome      | DL13 | Taulignan | 20 JO | NA | forte  | 103,253664 | 78,95238  | 7,59203  | 50,89194  | 689,04724  | 131,83883 | 8,66421  |
| 2013 Drome      | DL13 | Taulignan | 20 JO | NA | forte  | 105,094322 | 39,85934  | 8,55472  | 73,36996  | 783,73262  | 134,45421 | 10,91415 |
| 2013 Drome      | DL13 | Taulignan | 20 JO | NA | forte  | 89,650184  | 26,07033  | 9,80296  | 83,96337  | 836,90531  | 136,06593 | 8,64217  |
| 2013 Drome      | DL13 | Taulignan | 20 JO | NA | forte  | 90,818682  | 77,83297  | 6,66346  | 116,68315 | 916,75630  | 107,91941 | 9,40453  |
| 2013 Drome      | DL13 | Taulignan | 20 JO | NA | forte  | 108,414836 | 73,86813  | 8,63484  | 147,09890 | 964,25275  | 137,84249 | 8,38553  |
| 2013 Drome      | DL13 | Taulignan | 14 JO | NA | forte  | 109,80586  | NA        | 7,01534  | 126,69963 | 1069,40998 | 144,59707 | 11,80311 |
| 2013 Drome      | DL13 | Taulignan | 14 JO | NA | forte  | 103,300366 | 67,11941  | 8,17033  | 137,70330 | 577,70638  | 139,88278 | 13,25000 |
| 2013 Drome      | DL13 | Taulignan | 14 JO | NA | forte  | 99,933315  | 66,56044  | 8,22711  | 140,47985 | 991,10604  | 128,45788 | 11,57738 |
| 2013 Drome      | DL13 | Taulignan | 14 JO | NA | forte  | 109,658424 | 55,63223  | 6,56250  | 129,48352 | 629,32177  | 127,31868 | 11,66300 |
| 2013 Drome      | DL13 | Taulignan | 14 JO | NA | forte  | 112,990842 | 44,72967  | 10,21497 | 162,10073 | 664,93274  | 149,74725 | 9,57738  |
| 2013 Drome      | DL13 | Taulignan | 14 JO | NA | forte  | 112,846154 | 57,18681  | 8,79304  | 137,51648 | 829,25435  | 148,57326 | 12,37317 |
| 2013 Drome      | DL13 | Taulignan | 14 JO | NA | forte  | 126,247252 | 49,59560  | 8,09570  | 135,40293 | 522,62394  | 127,60806 | 10,62866 |
| 2013 Drome      | DL13 | Taulignan | 14 JO | NA | forte  | 105,76282  | 53,17582  | 9,00481  | 149,68132 | 437,21311  | 128,91209 | 11,66300 |
| 2013 Drome      | DL13 | Taulignan | 14 JO | NA | forte  | 95,534798  | 60,12015  | 7,08883  | 125,66300 | 1343,64391 | 140,96703 | 13,80769 |
| 2013 Drome      | DL13 | Taulignan | 14 JO | NA | forte  | 106,110806 | 56,59194  | 6,06548  | 107,45055 | 561,95646  | 137,98168 | 11,74038 |
| 2013 Drome      | DL13 | Taulignan | 1 JO  | NA | forte  | 83,637362  | 103,81538 | 7,39400  | 135,24542 | 1092,08256 | 123,06593 | 7,35989  |
| 2013 Drome      | DL13 | Taulignan | 1 JO  | NA | forte  | 75,046704  | 109,14872 | 6,44299  | 128,62271 | 899,51634  | 124,20147 | 9,54121  |
| 2013 Drome      | DL13 | Taulignan | 1 JO  | NA | forte  | 89,65293   | 85,22198  | 7,48970  | 131,22344 | 675,77029  | 121,10989 | 11,09615 |
| 2013 Drome      | DL13 | Taulignan | 1 JO  | NA | forte  | 70,290294  | 111,89890 | 7,13141  | 132,62637 | 737,36100  | 134,23077 | 10,01168 |
| 2013 Drome      | DL13 | Taulignan | 1 JO  | NA | forte  | 81,101648  | 72,08352  | 6,75000  | 138,42491 | 1183,32789 | 137,72894 | 10,54739 |
| 2013 Drome      | DL13 | Taulignan | 1 JO  | NA | forte  | 66,044872  | 93,87912  | 7,65900  | 133,48718 | 936,64086  | 129,49084 | 9,56044  |
| 2013 Drome      | DL13 | Taulignan | 1 JO  | NA | forte  | 88,845238  | 78,37802  | 8,89858  | 151,27473 | 997,15861  | 121,85348 | 9,63233  |
| 2013 Drome      | DL13 | Taulignan | 1 JO  | NA | forte  | 71,612638  | 120,58462 | 7,58425  | 145,27473 | 1303,01800 | 138,32601 | 14,00916 |
| 2013 Drome      | DL13 | Taulignan | 1 JO  | NA | forte  | 111,524726 | 78,87253  | 7,31201  | 141,91209 | 1179,65221 | 140,73626 | 13,61264 |
| 2013 Drome      | DL13 | Taulignan | 1 JO  | NA | forte  | 136,898352 | 100,91282 | 6,76374  | 136,00366 | 934,10031  | 124,46154 | 9,65385  |
| 2013 Drome      | DL13 | Taulignan | 10 JO | NA | forte  | 121,905678 | 65,97143  | 6,64034  | 120,57509 | 948,25088  | 130,66300 | 12,76145 |
| 2013 Drome      | DL13 | Taulignan | 10 JO | NA | forte  | 140,641026 | 40,23297  | 6,76442  | 137,26007 | 1018,41167 | 130,87912 | 8,08791  |
| 2013 Drome      | DL13 | Taulignan | 10 JO | NA | forte  | 150,912088 | 42,64396  | 7,17960  | 131,58974 | 283,84278  | 133,74725 | 10,35646 |
| 2013 Drome      | DL13 | Taulignan | 10 JO | NA | forte  | 133,59249  | 85,47106  | 8,21738  | 138,08791 | 1076,48085 | 134,12454 | 10,66209 |
| 2013 Drome      | DL13 | Taulignan | 10 JO | NA | forte  | 109,389194 | 64,52308  | 7,26992  | 120,44872 | 1251,53686 | 147,19414 | 9,71291  |
| 2013 Drome      | DL13 | Taulignan | 10 JO | NA | forte  | 113,217032 | 50,00220  | 7,00023  | 130,68498 | 735,53414  | 135,02198 | 7,34341  |
| 2013 Drome      | DL13 | Taulignan | 10 JO | NA | forte  | 143,824176 | 61,91941  | 7,78091  | 135,60073 | 910,14365  | 145,48352 | 11,83723 |
| 2013 Drome      | DL13 | Taulignan | 10 JO | NA | forte  | 151,76923  | 74,69744  | 7,76923  | 137,80220 | 324,50027  | 136,03297 | 9,67170  |
| 2013 Drome      | DL13 | Taulignan | 10 JO | NA | forte  | 144,501832 | 61,19414  | 7,16346  | 118,53114 | 828,56544  | 141,15018 | 10,48535 |
| 2013 Drome      | DL13 | Taulignan | 10 JO | NA | forte  | 144,87271  | 49,65714  | 7,76488  | 140,53480 | 970,92791  | 137,26374 | 9,93887  |
| 2013 LureAlbion | LZ13 | Banon     | 11 JO | NA | faible | 124,916666 | 151,83590 | 6,11435  | 124,55678 | 1195,94491 | 147,60806 | NA       |
| 2013 LureAlbion | LZ13 | Banon     | 11 JO | NA | faible | 147,599816 | 136,00147 | 6,17239  | 124,55311 | 1195,14880 | 135,45788 | 16,71245 |
| 2013 LureAlbion | LZ13 | Banon     | 11 JO | NA | faible | 138,856228 | 148,67253 | 5,98947  | 110,31868 | 1059,32029 | 146,44689 | 17,10394 |
| 2013 LureAlbion | LZ13 | Banon     | 11 JO | NA | faible | 131,241758 | 156,48938 | 7,29945  | 134,07692 | 1290,30518 | 142,61538 | 15,65385 |

|      |            |      |       |    |    |    |        |            |           |         |           |            |           |          |
|------|------------|------|-------|----|----|----|--------|------------|-----------|---------|-----------|------------|-----------|----------|
| 2013 | LureAlbion | LZ13 | Banon | 11 | JO | NA | faible | 68,488096  | 142,06740 | 5,98970 | 118,47619 | 1110,26941 | 140,79487 | 17,89057 |
| 2013 | LureAlbion | LZ13 | Banon | 11 | JO | NA | faible | 79,19597   | 139,98022 | 4,38221 | 109,01832 | 1200,21101 | 131,37363 | 17,41300 |
| 2013 | LureAlbion | LZ13 | Banon | 11 | JO | NA | faible | 74,587912  | 162,37509 | 6,14583 | 96,08608  | 1226,91020 | 133,09158 | 17,78938 |
| 2013 | LureAlbion | LZ13 | Banon | 11 | JO | NA | faible | 83,010074  | 159,13260 | 5,75478 | 107,64835 | 1387,26300 | 139,80220 | 16,52473 |
| 2013 | LureAlbion | LZ13 | Banon | 11 | JO | NA | faible | 91,57326   | 193,23516 | 5,80907 | 116,35165 | 1636,84310 | 146,52015 | 19,34821 |
| 2013 | LureAlbion | LZ13 | Banon | 11 | JO | NA | faible | 85,489926  | 163,77582 | 7,49451 | 129,17216 | 1736,85780 | 154,89744 | 17,11493 |
| 2013 | LureAlbion | LZ13 | Banon | 4  | JO | NA | faible | 135,811356 | 62,72967  | 6,77065 | 143,81319 | 1054,72175 | 135,40659 | 12,53091 |
| 2013 | LureAlbion | LZ13 | Banon | 4  | JO | NA | faible | 132,634616 | 107,85934 | 7,34776 | 136,05495 | 501,38183  | 128,94505 | 15,30220 |
| 2013 | LureAlbion | LZ13 | Banon | 4  | JO | NA | faible | 134,277472 | 86,77070  | 6,74176 | 133,78022 | 352,36480  | 132,38462 | 11,46841 |
| 2013 | LureAlbion | LZ13 | Banon | 4  | JO | NA | faible | 125,067766 | 65,77729  | 6,46520 | 140,12088 | NA         | 140,66667 | 11,66621 |
| 2013 | LureAlbion | LZ13 | Banon | 4  | JO | NA | faible | 131,808608 | NA        | 7,31628 | 159,62271 | 311,26978  | 143,47253 | 9,39739  |
| 2013 | LureAlbion | LZ13 | Banon | 4  | JO | NA | faible | 152,788462 | 73,48864  | 6,72940 | 156,98901 | 511,73358  | 122,55311 | 9,79579  |
| 2013 | LureAlbion | LZ13 | Banon | 4  | JO | NA | faible | 138,782968 | 73,66886  | 7,18407 | 153,34066 | 416,69932  | 119,26374 | 11,76877 |
| 2013 | LureAlbion | LZ13 | Banon | 4  | JO | NA | faible | 135,742674 | 72,39267  | 7,18269 | 147,08059 | 454,05773  | 134,67399 | 10,90110 |
| 2013 | LureAlbion | LZ13 | Banon | 4  | JO | NA | faible | 120,575092 | 94,82637  | 7,77495 | 151,56044 | 459,13867  | 122,42308 | 7,69414  |
| 2013 | LureAlbion | LZ13 | Banon | 4  | JO | NA | faible | 102,668498 | 119,86667 | 6,09787 | 140,50916 | 675,14094  | NA        | 8,24588  |
| 2013 | LureAlbion | LZ13 | Banon | 12 | JO | NA | faible | 120,809524 | 78,44103  | NA      | 157,25275 | 665,06704  | NA        | 9,80151  |
| 2013 | LureAlbion | LZ13 | Banon | 12 | JO | NA | faible | 114,599816 | 111,54579 | 7,78480 | 160,69597 | 643,34389  | 141,69963 | 12,96223 |
| 2013 | LureAlbion | LZ13 | Banon | 12 | JO | NA | faible | 116,508242 | 91,68498  | 7,70948 | 160,32967 | 410,54103  | 123,96703 | 10,19002 |
| 2013 | LureAlbion | LZ13 | Banon | 12 | JO | NA | faible | 118,583334 | 120,29304 | 7,45833 | 152,49817 | 878,99365  | 135,71429 | 10,87546 |
| 2013 | LureAlbion | LZ13 | Banon | 12 | JO | NA | faible | 114,656594 | 87,45641  | 6,10920 | 134,63004 | 579,33780  | 131,31868 | 7,50733  |
| 2013 | LureAlbion | LZ13 | Banon | 12 | JO | NA | faible | 109,130494 | 86,28132  | 8,05082 | 170,20879 | 754,54523  | 143,20879 | 9,94872  |
| 2013 | LureAlbion | LZ13 | Banon | 12 | JO | NA | faible | 77,62271   | 80,05568  | 5,06937 | 122,87179 | 530,66097  | 130,57875 | 7,99267  |
| 2013 | LureAlbion | LZ13 | Banon | 12 | JO | NA | faible | 28,960622  | 48,72747  | 1,91346 | 62,45238  | 608,63027  | 140,34066 | 11,34570 |
| 2013 | LureAlbion | LZ13 | Banon | 12 | JO | NA | faible | 71,561814  | 31,67033  | 5,16094 | 100,65201 | 630,76537  | 124,97070 | 8,19048  |
| 2013 | LureAlbion | LZ13 | Banon | 12 | JO | NA | faible | 91,050366  | 83,46154  | 5,57521 | 130,71795 | 415,02386  | 136,00366 | 9,76007  |
| 2013 | LureAlbion | LZ13 | Banon | 1  | JO | NA | faible | 103,465202 | 96,99780  | 6,19803 | 129,36996 | 759,09147  | 140,29304 | 12,70467 |
| 2013 | LureAlbion | LZ13 | Banon | 1  | JO | NA | faible | 45,405678  | 36,58022  | 2,65316 | 74,83516  | 583,77234  | 144,90476 | 14,07463 |
| 2013 | LureAlbion | LZ13 | Banon | 1  | JO | NA | faible | 110,533882 | 117,01685 | 7,66163 | 141,34066 | 739,94509  | 131,95604 | 15,33333 |
| 2013 | LureAlbion | LZ13 | Banon | 1  | JO | NA | faible | 75,177656  | NA        | 4,32555 | 104,51282 | 842,20367  | 138,53480 | 13,23535 |
| 2013 | LureAlbion | LZ13 | Banon | 1  | JO | NA | faible | 139,914836 | 86,25934  | 8,07315 | 153,53480 | 825,86919  | 150,12454 | 13,88462 |
| 2013 | LureAlbion | LZ13 | Banon | 1  | JO | NA | faible | 138,732142 | NA        | 7,50069 | 156,86081 | 629,02416  | 141,19048 | 12,36126 |
| 2013 | LureAlbion | LZ13 | Banon | 1  | JO | NA | faible | 140,538462 | 114,15971 | 7,77244 | 141,87179 | 692,95023  | 127,74359 | 11,32830 |
| 2013 | LureAlbion | LZ13 | Banon | 1  | JO | NA | faible | 139,921704 | 96,95531  | 7,35348 | 147,42125 | 1100,10421 | 127,86447 | 15,91941 |
| 2013 | LureAlbion | LZ13 | Banon | 1  | JO | NA | faible | 136,98718  | 109,23516 | 8,07440 | 154,29670 | 437,89341  | 132,10256 | 13,33883 |
| 2013 | LureAlbion | LZ13 | Banon | 1  | JO | NA | faible | 153,738096 | 102,54359 | 8,37054 | 162,64469 | 669,79440  | 131,53114 | 12,20559 |
| 2013 | LureAlbion | LZ13 | Banon | 8  | JO | NA | faible | 47,050824  | 39,76703  | 6,01099 | 88,04762  | 398,63607  | 122,32967 | 13,97527 |
| 2013 | LureAlbion | LZ13 | Banon | 8  | JO | NA | faible | 40,357142  | 17,09890  | 6,30315 | 85,49084  | 848,80673  | 117,84249 | 9,13828  |
| 2013 | LureAlbion | LZ13 | Banon | 8  | JO | NA | faible | 72,766484  | 27,60293  | 5,76477 | 80,32967  | 959,37460  | 110,83150 | 15,71429 |
| 2013 | LureAlbion | LZ13 | Banon | 8  | JO | NA | faible | 33,871794  | NA        | NA      | 83,56044  | 691,23853  | 120,86447 | 12,41209 |
| 2013 | LureAlbion | LZ13 | Banon | 8  | JO | NA | faible | 50,399268  | 53,31209  | 5,02835 | 90,00366  | 801,48020  | 110,30037 | 19,24588 |

|      |            |      |       |    |    |    |        |            |           |         |           |            |           |          |
|------|------------|------|-------|----|----|----|--------|------------|-----------|---------|-----------|------------|-----------|----------|
| 2013 | LureAlbion | LZ13 | Banon | 8  | JO | NA | faible | 51,644688  | 55,72308  | 6,36229 | 101,22344 | 789,91215  | 125,36996 | 14,05174 |
| 2013 | LureAlbion | LZ13 | Banon | 8  | JO | NA | faible | 56,608058  | 56,26667  | 4,43269 | 85,76190  | 429,50311  | 110,91209 | 11,86195 |
| 2013 | LureAlbion | LZ13 | Banon | 8  | JO | NA | faible | 45,793956  | NA        | 5,49518 | 80,55311  | 577,13254  | 103,95055 | 31,74212 |
| 2013 | LureAlbion | LZ13 | Banon | 8  | JO | NA | faible | 66,308608  | 41,95165  | 4,44826 | 94,96703  | 549,33200  | 122,97802 | 12,00046 |
| 2013 | LureAlbion | LZ13 | Banon | 8  | JO | NA | faible | 79,401098  | NA        | 4,79693 | 97,54945  | 1003,29248 | 128,96703 | 12,52610 |
| 2013 | LureAlbion | LZ13 | Banon | 20 | JO | NA | forte  | 63,882784  | 33,86960  | 6,68063 | 82,75641  | 538,33264  | 112,43956 | 11,77060 |
| 2013 | LureAlbion | LZ13 | Banon | 20 | JO | NA | forte  | 59,215202  | 70,57143  | 7,96886 | 79,64103  | 474,88636  | 115,69963 | 13,84844 |
| 2013 | LureAlbion | LZ13 | Banon | 20 | JO | NA | forte  | 69,39652   | 26,16484  | 7,64045 | 84,90110  | 720,66756  | 125,07326 | 10,20742 |
| 2013 | LureAlbion | LZ13 | Banon | 20 | JO | NA | forte  | 68,04945   | 78,09377  | 7,51305 | 85,69963  | 247,77454  | 123,19414 | 10,16575 |
| 2013 | LureAlbion | LZ13 | Banon | 20 | JO | NA | forte  | 56,382784  | 77,02125  | 7,22471 | 63,52015  | 917,04835  | 119,14286 | 14,21429 |
| 2013 | LureAlbion | LZ13 | Banon | 20 | JO | NA | forte  | 69,374542  | 76,08571  | 5,23695 | 84,60440  | 562,05185  | 104,22344 | 10,06364 |
| 2013 | LureAlbion | LZ13 | Banon | 20 | JO | NA | forte  | 74,543956  | 55,09670  | 6,94048 | 81,70696  | 465,95394  | 123,94139 | 10,31181 |
| 2013 | LureAlbion | LZ13 | Banon | 20 | JO | NA | forte  | 80,669414  | 40,70037  | 6,95089 | 87,53846  | 736,60478  | 119,62637 | 9,32647  |
| 2013 | LureAlbion | LZ13 | Banon | 20 | JO | NA | forte  | 93,424908  | 62,42418  | NA      | 92,87729  | 390,54121  | 112,03846 | 7,64698  |
| 2013 | LureAlbion | LZ13 | Banon | 20 | JO | NA | forte  | 97,114468  | 83,21319  | 8,84100 | 83,87546  | 934,47452  | 114,66300 | 9,19734  |
| 2013 | LureAlbion | LZ13 | Banon | 6  | JO | NA | forte  | 106,457876 | 65,02637  | 8,39736 | 97,10256  | 687,34286  | 121,68498 | 10,97848 |
| 2013 | LureAlbion | LZ13 | Banon | 6  | JO | NA | forte  | 99,779304  | 96,25201  | 8,95742 | 96,31136  | 244,28029  | 125,70330 | 12,43178 |
| 2013 | LureAlbion | LZ13 | Banon | 6  | JO | NA | forte  | 96,04762   | 63,85495  | 9,95421 | 87,91575  | 707,63398  | 130,53114 | 12,14423 |
| 2013 | LureAlbion | LZ13 | Banon | 6  | JO | NA | forte  | 98,649268  | 51,14725  | 7,93521 | 97,20513  | 351,69118  | 104,09524 | 13,56181 |
| 2013 | LureAlbion | LZ13 | Banon | 6  | JO | NA | forte  | 97,966118  | 41,26374  | 9,65774 | 108,31502 | 436,14636  | 133,63004 | 9,47161  |
| 2013 | LureAlbion | LZ13 | Banon | 6  | JO | NA | forte  | 108,66575  | 59,52967  | 8,93178 | 102,83516 | 335,17199  | 120,96703 | 13,91300 |
| 2013 | LureAlbion | LZ13 | Banon | 6  | JO | NA | forte  | 92,905678  | 44,18681  | 9,12111 | 72,50916  | 658,04758  | 120,72161 | 9,83974  |
| 2013 | LureAlbion | LZ13 | Banon | 6  | JO | NA | forte  | 122,52381  | 52,46593  | 8,30151 | 105,22344 | 750,20301  | 137,37363 | 13,26557 |
| 2013 | LureAlbion | LZ13 | Banon | 6  | JO | NA | forte  | 125,563186 | NA        | 8,99634 | 103,69597 | 766,47089  | 121,56044 | 10,87775 |
| 2013 | LureAlbion | LZ13 | Banon | 6  | JO | NA | forte  | 83,52381   | 69,49670  | 9,34684 | 91,15385  | 809,76205  | 119,02198 | 11,44414 |
| 2013 | LureAlbion | LZ13 | Banon | 17 | JO | NA | forte  | 42,916666  | 64,58901  | 4,31714 | 94,62454  | 261,40060  | 126,44322 | 7,96520  |
| 2013 | LureAlbion | LZ13 | Banon | 17 | JO | NA | forte  | 38,954212  | 109,12381 | 4,95192 | 94,74725  | 367,71940  | 117,63004 | 9,25046  |
| 2013 | LureAlbion | LZ13 | Banon | 17 | JO | NA | forte  | 46,05403   | 51,08132  | 4,86607 | 81,76740  | 205,24784  | 114,74542 | 10,27793 |
| 2013 | LureAlbion | LZ13 | Banon | 17 | JO | NA | forte  | 42,240842  | NA        | 5,87386 | 103,05861 | 479,62561  | 115,99634 | 11,10852 |
| 2013 | LureAlbion | LZ13 | Banon | 17 | JO | NA | forte  | 31,22619   | 34,20220  | 5,60155 | 98,50916  | 297,89370  | 121,65568 | 11,70788 |
| 2013 | LureAlbion | LZ13 | Banon | 17 | JO | NA | forte  | 39,135532  | 46,17143  | 4,21429 | 71,55861  | 435,19748  | 118,61905 | 14,12592 |
| 2013 | LureAlbion | LZ13 | Banon | 17 | JO | NA | forte  | 81,885532  | 62,27692  | 4,49519 | 89,19414  | 451,96806  | 114,12821 | 10,25137 |
| 2013 | LureAlbion | LZ13 | Banon | 17 | JO | NA | forte  | 81,41575   | 26,99121  | 3,40659 | 82,77656  | NA         | 108,17949 | 8,59982  |
| 2013 | LureAlbion | LZ13 | Banon | 17 | JO | NA | forte  | 101,537546 | 49,70696  | 4,16781 | 88,68864  | NA         | 117,46520 | 12,18086 |
| 2013 | LureAlbion | LZ13 | Banon | 17 | JO | NA | forte  | 90,576924  | 61,78462  | 5,01671 | 99,24176  | NA         | 116,13553 | 7,90018  |
| 2013 | LureAlbion | LZ13 | Banon | 15 | JO | NA | forte  | 93,40751   | 85,91648  | 4,62431 | 88,70696  | NA         | 117,77656 | 14,21291 |
| 2013 | LureAlbion | LZ13 | Banon | 15 | JO | NA | forte  | 82,42445   | 49,46813  | 5,02226 | 93,04762  | 696,34739  | 134,86081 | 11,32326 |
| 2013 | LureAlbion | LZ13 | Banon | 15 | JO | NA | forte  | 89,928572  | 35,84176  | 5,46841 | 99,93773  | 562,50531  | 119,34432 | 10,32189 |
| 2013 | LureAlbion | LZ13 | Banon | 15 | JO | NA | forte  | 94,681318  | 56,35604  | 5,28228 | 104,09524 | 749,54532  | 136,22711 | 16,64423 |
| 2013 | LureAlbion | LZ13 | Banon | 15 | JO | NA | forte  | 77,65934   | 32,51429  | 4,85691 | 85,76190  | 585,56991  | 115,83883 | 9,58059  |
| 2013 | LureAlbion | LZ13 | Banon | 15 | JO | NA | forte  | 71,492674  | 53,66374  | 4,55357 | 89,31502  | 689,34358  | 123,90476 | 11,71932 |



|      |            |      |          |    |    |    |        |           |          |         |           |            |           |          |
|------|------------|------|----------|----|----|----|--------|-----------|----------|---------|-----------|------------|-----------|----------|
| 2013 | LureAlbion | LZ13 | Banon    | 15 | JO | NA | forte  | 74,093406 | 85,03590 | 5,44680 | 113,13553 | 208,72946  | 123,27106 | 10,08242 |
| 2013 | LureAlbion | LZ13 | Banon    | 15 | JO | NA | forte  | 66,550366 | 45,37582 | 5,11882 | 109,14103 | 319,30536  | 136,86081 | 12,74451 |
| 2013 | LureAlbion | LZ13 | Banon    | 15 | JO | NA | forte  | 60,996336 | 88,74066 | 5,99725 | 95,90476  | 571,16513  | 101,66850 | 9,80632  |
| 2013 | LureAlbion | LZ13 | Banon    | 15 | JO | NA | forte  | 69,211538 | 87,10476 | 5,07452 | 102,61905 | 899,92111  | 134,24176 | 12,77518 |
| 2013 | LureAlbion | LZ13 | Banon    | 2  | JO | NA | forte  | 69,718864 | 60,95678 | 6,37225 | 114,21245 | 434,46693  | 130,32234 | 13,09112 |
| 2013 | LureAlbion | LZ13 | Banon    | 2  | JO | NA | forte  | 46,574176 | 26,09670 | 7,45147 | 128,41758 | 345,47289  | 125,68864 | 9,31914  |
| 2013 | LureAlbion | LZ13 | Banon    | 2  | JO | NA | forte  | 30,169414 | 53,28571 | 6,45330 | 110,16300 | 396,10037  | 100,42491 | 11,28663 |
| 2013 | LureAlbion | LZ13 | Banon    | 2  | JO | NA | forte  | 34,623626 | NA       | 5,99313 | 103,74725 | 1042,71049 | 124,04762 | 14,52335 |
| 2013 | LureAlbion | LZ13 | Banon    | 2  | JO | NA | forte  | 38,223444 | 82,98168 | 5,46257 | 107,85714 | 714,94904  | 126,84615 | 12,03297 |
| 2013 | LureAlbion | LZ13 | Banon    | 2  | JO | NA | forte  | 38,99359  | 22,92015 | 5,75618 | 114,60440 | 635,32190  | 123,23077 | 10,65888 |
| 2013 | LureAlbion | LZ13 | Banon    | 2  | JO | NA | forte  | 48,386446 | 53,43443 | 5,72463 | 97,06960  | 395,37294  | 118,50916 | 11,30266 |
| 2013 | LureAlbion | LZ13 | Banon    | 2  | JO | NA | forte  | 36,271978 | NA       | 5,80884 | 105,07326 | 503,66198  | 114,09158 | 6,12431  |
| 2013 | LureAlbion | LZ13 | Banon    | 2  | JO | NA | forte  | 45,447802 | 56,79780 | 5,02782 | 103,65934 | 308,56826  | 112,21612 | 9,00687  |
| 2013 | LureAlbion | LZ13 | Banon    | 2  | JO | NA | forte  | 42,601648 | 47,71722 | 5,51225 | 104,65568 | 572,61232  | 132,23077 | 11,86722 |
| 2013 | LureAlbion | LT13 | Vacheres | 13 | JO | NA | faible | 95,611722 | 51,32601 | NA      | 91,77289  | 586,03814  | 126,01099 | 16,24359 |
| 2013 | LureAlbion | LT13 | Vacheres | 13 | JO | NA | faible | 98,588828 | 49,54432 | 5,26213 | 106,89744 | NA         | 129,24908 | 9,59341  |
| 2013 | LureAlbion | LT13 | Vacheres | 13 | JO | NA | faible | 84,089744 | NA       | 5,32921 | 106,66667 | 251,19000  | 128,24176 | 10,20673 |
| 2013 | LureAlbion | LT13 | Vacheres | 13 | JO | NA | faible | 94,903846 | 37,65934 | 5,39469 | 105,01099 | 553,19793  | 130,93773 | 8,63599  |
| 2013 | LureAlbion | LT13 | Vacheres | 13 | JO | NA | faible | 93,21978  | 73,93626 | 5,18521 | 104,92308 | 641,26851  | 115,24176 | 9,15201  |
| 2013 | LureAlbion | LT13 | Vacheres | 13 | JO | NA | faible | 84,685898 | 66,51429 | NA      | 99,75824  | 525,18732  | 125,67033 | 12,53755 |
| 2013 | LureAlbion | LT13 | Vacheres | 13 | JO | NA | faible | 89,623626 | 56,64322 | 5,04625 | 140,69780 | NA         | 128,42125 | 8,55723  |
| 2013 | LureAlbion | LT13 | Vacheres | 13 | JO | NA | faible | 94,930402 | 71,03297 | 4,50092 | 111,52015 | 598,39541  | 122,51648 | 12,59661 |
| 2013 | LureAlbion | LT13 | Vacheres | 13 | JO | NA | faible | 66,270146 | 62,33187 | 4,80082 | 104,13187 | NA         | 103,16850 | 10,67651 |
| 2013 | LureAlbion | LT13 | Vacheres | 13 | JO | NA | faible | 71,324176 | 40,39121 | 4,94093 | 98,24908  | NA         | 109,94322 | 8,29350  |
| 2013 | LureAlbion | LT13 | Vacheres | 19 | JO | NA | faible | 85,083334 | 40,56117 | 5,00549 | 90,42857  | 581,25461  | 102,31136 | 8,18864  |
| 2013 | LureAlbion | LT13 | Vacheres | 19 | JO | NA | faible | 79,26923  | 74,61758 | 6,00807 | 93,33700  | 448,83344  | 114,16850 | 20,83011 |
| 2013 | LureAlbion | LT13 | Vacheres | 19 | JO | NA | faible | 78,574176 | 55,22491 | NA      | 105,96337 | 396,25315  | 131,49451 | 8,96772  |
| 2013 | LureAlbion | LT13 | Vacheres | 19 | JO | NA | faible | 70,011904 | 65,78608 | NA      | 99,27106  | 1012,02208 | 141,23077 | 14,00412 |
| 2013 | LureAlbion | LT13 | Vacheres | 19 | JO | NA | faible | 73,501832 | 62,23883 | 5,50137 | 88,13187  | 163,86825  | 125,34799 | 7,35394  |
| 2013 | LureAlbion | LT13 | Vacheres | 19 | JO | NA | faible | 69,880036 | 70,49890 | 4,64629 | NA        | 237,52820  | 135,24908 | 9,26969  |
| 2013 | LureAlbion | LT13 | Vacheres | 19 | JO | NA | faible | 35,259158 | 63,59121 | 4,65659 | 91,52747  | 486,72085  | 120,20147 | 10,19162 |
| 2013 | LureAlbion | LT13 | Vacheres | 19 | JO | NA | faible | 55,048534 | 30,06813 | 5,90076 | 116,42857 | 479,25028  | 129,68864 | 9,04212  |
| 2013 | LureAlbion | LT13 | Vacheres | 19 | JO | NA | faible | 45,738096 | 75,61758 | 4,79853 | 88,40659  | 640,19494  | 117,86813 | 10,21429 |
| 2013 | LureAlbion | LT13 | Vacheres | 19 | JO | NA | faible | 30,125    | 54,93846 | 3,50458 | 81,78022  | 364,26209  | 133,43590 | 8,75824  |
| 2013 | LureAlbion | LT13 | Vacheres | 6  | JO | NA | faible | 27,357142 | 69,88132 | 3,59638 | 83,16850  | 263,63771  | 125,73993 | 10,42720 |
| 2013 | LureAlbion | LT13 | Vacheres | 6  | JO | NA | faible | 19,067932 | 35,24615 | 2,56229 | 75,00549  | 548,40154  | 113,73260 | 10,67033 |
| 2013 | LureAlbion | LT13 | Vacheres | 6  | JO | NA | faible | 44,830586 | 62,61099 | 4,63278 | 76,67766  | 339,79488  | 113,35165 | 11,07349 |
| 2013 | LureAlbion | LT13 | Vacheres | 6  | JO | NA | faible | 36,242674 | 40,87326 | 3,79130 | NA        | 374,20979  | 132,73993 | 8,07280  |
| 2013 | LureAlbion | LT13 | Vacheres | 6  | JO | NA | faible | 39,595238 | 68,69158 | 5,37176 | 104,14835 | 322,42340  | 113,14652 | 8,95467  |
| 2013 | LureAlbion | LT13 | Vacheres | 6  | JO | NA | faible | 29,720696 | 42,25348 | 3,05323 | 82,80586  | 390,04013  | 114,34799 | 10,42353 |
| 2013 | LureAlbion | LT13 | Vacheres | 6  | JO | NA | faible | 42,59478  | 81,15385 | NA      | 95,81685  | 185,78514  | 137,21245 | 9,36081  |

|      |            |      |          |    |    |    |        |             |           |         |           |           |           |          |
|------|------------|------|----------|----|----|----|--------|-------------|-----------|---------|-----------|-----------|-----------|----------|
| 2013 | LureAlbion | LT13 | Vacheres | 6  | JO | NA | faible | 44,106228   | 34,80659  | 4,30975 | 114,86081 | 228,46957 | 125,09158 | 8,39492  |
| 2013 | LureAlbion | LT13 | Vacheres | 6  | JO | NA | faible | 23,438644   | NA        | 1,94505 | 62,66484  | 724,30391 | 128,38095 | 10,42651 |
| 2013 | LureAlbion | LT13 | Vacheres | 6  | JO | NA | faible | 20,634616   | 25,10989  | 2,75343 | 64,39560  | NA        | 120,73260 | 11,99359 |
| 2013 | LureAlbion | LT13 | Vacheres | 18 | JO | NA | faible | 156,3754579 | 83,10909  | 5,39904 | 138,87673 | 801,47804 | 118,66411 | 9,32326  |
| 2013 | LureAlbion | LT13 | Vacheres | 18 | JO | NA | faible | 137,2710623 | 23,82424  | 5,44986 | 146,45553 | 288,94137 | 172,86701 | 40,07555 |
| 2013 | LureAlbion | LT13 | Vacheres | 18 | JO | NA | faible | 161,2445055 | 42,42424  | 5,76545 | 143,31450 | 822,84499 | 179,70099 | 17,37546 |
| 2013 | LureAlbion | LT13 | Vacheres | 18 | JO | NA | faible | 186,3461538 | 39,44242  | 6,51007 | 166,71495 | 133,21614 | 155,37327 | 14,03640 |
| 2013 | LureAlbion | LT13 | Vacheres | 18 | JO | NA | faible | 144,5009158 | 34,00000  | 5,20765 | 149,90917 | 401,24538 | 126,61243 | 11,47711 |
| 2013 | LureAlbion | LT13 | Vacheres | 18 | JO | NA | faible | 147,1263736 | 72,27273  | 6,28411 | 148,85745 | 196,70979 | 113,09642 | 5,89789  |
| 2013 | LureAlbion | LT13 | Vacheres | 18 | JO | NA | faible | 144,6904762 | 60,34545  | 5,35211 | 142,29764 | NA        | 178,89217 | 29,55311 |
| 2013 | LureAlbion | LT13 | Vacheres | 18 | JO | NA | faible | 184,3983516 | 73,70909  | 5,82898 | 156,71502 | NA        | 157,63065 | 9,47573  |
| 2013 | LureAlbion | LT13 | Vacheres | 18 | JO | NA | faible | 55,03571429 | NA        | 4,76648 | 144,63412 | NA        | 167,50215 | 25,48168 |
| 2013 | LureAlbion | LT13 | Vacheres | 18 | JO | NA | faible | 28,2239011  | NA        | 2,47734 | 105,66823 | NA        | 131,62038 | 7,04121  |
| 2013 | LureAlbion | LT13 | Vacheres | 20 | JO | NA | faible | 12,36263736 | 102,87677 | 1,89789 | 59,61030  | 421,32175 | 137,67065 | 18,26603 |
| 2013 | LureAlbion | LT13 | Vacheres | 20 | JO | NA | faible | 21,92582418 | 104,06061 | 2,77301 | 98,70772  | 300,33202 | 117,88891 | 8,19872  |
| 2013 | LureAlbion | LT13 | Vacheres | 20 | JO | NA | faible | 32,06227106 | 71,96364  | 6,19437 | 105,70701 | 330,92589 | 150,69998 | 6,78159  |
| 2013 | LureAlbion | LT13 | Vacheres | 20 | JO | NA | faible | 150,9038462 | 38,68485  | 4,72825 | 169,97505 | 665,95606 | 138,93885 | 14,00458 |
| 2013 | LureAlbion | LT13 | Vacheres | 20 | JO | NA | faible | 44,73489011 | 114,98182 | 6,17926 | 134,19121 | 436,43022 | 142,95529 | 14,56662 |
| 2013 | LureAlbion | LT13 | Vacheres | 20 | JO | NA | faible | 40,49267399 | 68,80000  | 4,70536 | 103,53707 | 529,62785 | 152,57432 | 10,41552 |
| 2013 | LureAlbion | LT13 | Vacheres | 20 | JO | NA | faible | 94,43681319 | 56,07879  | 1,27850 | 165,21405 | NA        | 189,27807 | 19,50229 |
| 2013 | LureAlbion | LT13 | Vacheres | 20 | JO | NA | faible | 102,978022  | NA        | 1,34272 | 141,38212 | NA        | 190,59608 | 0,27198  |
| 2013 | LureAlbion | LT13 | Vacheres | 20 | JO | NA | faible | NA          | NA        | NA      | 203,24166 | NA        | 181,96443 | 0,18132  |
| 2013 | LureAlbion | LT13 | Vacheres | 20 | JO | NA | faible | NA          | NA        | NA      | 201,29865 | NA        | NA        | NA       |
| 2013 | LureAlbion | LT13 | Vacheres | 8  | JO | NA | forte  | 107,9349817 | 37,35354  | 5,59341 | 151,43936 | 492,29901 | 151,88294 | 12,77885 |
| 2013 | LureAlbion | LT13 | Vacheres | 8  | JO | NA | forte  | 45,96336996 | 43,14545  | 4,10760 | 161,41666 | 303,04094 | 148,47782 | 11,10119 |
| 2013 | LureAlbion | LT13 | Vacheres | 8  | JO | NA | forte  | 134,7875458 | 84,14141  | 6,22940 | 159,74676 | 338,92484 | 148,57826 | 7,12500  |
| 2013 | LureAlbion | LT13 | Vacheres | 8  | JO | NA | forte  | 98,92124542 | 51,58384  | 5,51580 | 152,63906 | 355,63702 | 145,56533 | 9,94734  |
| 2013 | LureAlbion | LT13 | Vacheres | 8  | JO | NA | forte  | 95,9459707  | 99,48485  | 6,22573 | 147,90916 | 389,53832 | 139,94533 | 10,30907 |
| 2013 | LureAlbion | LT13 | Vacheres | 8  | JO | NA | forte  | 77,16666667 | 73,25657  | 6,25641 | 130,75857 | 458,47644 | 153,78061 | 8,85577  |
| 2013 | LureAlbion | LT13 | Vacheres | 8  | JO | NA | forte  | 156,9835165 | 103,53333 | 1,23935 | NA        | 441,08467 | 142,89175 | 15,83059 |
| 2013 | LureAlbion | LT13 | Vacheres | 8  | JO | NA | forte  | 71,00732601 | 83,25253  | 6,33516 | 84,13172  | NA        | 154,62111 | 11,11310 |
| 2013 | LureAlbion | LT13 | Vacheres | 8  | JO | NA | forte  | 10,00549451 | 73,59394  | NA      | 157,91340 | NA        | 156,11119 | 9,05540  |
| 2013 | LureAlbion | LT13 | Vacheres | 8  | JO | NA | forte  | 124,1547619 | NA        | NA      | NA        | NA        | NA        | NA       |
| 2013 | LureAlbion | LT13 | Vacheres | 7  | JO | NA | forte  | 62,08974359 | 70,75152  | 4,35554 | 103,22366 | 298,91957 | 119,40100 | 7,81319  |
| 2013 | LureAlbion | LT13 | Vacheres | 7  | JO | NA | forte  | 24,81318681 | 43,10909  | 1,92411 | 39,70763  | 311,73848 | 105,35569 | 10,09066 |
| 2013 | LureAlbion | LT13 | Vacheres | 7  | JO | NA | forte  | 24,79395604 | 48,44848  | 1,58631 | 122,96893 | 450,06937 | 113,18825 | 8,32830  |
| 2013 | LureAlbion | LT13 | Vacheres | 7  | JO | NA | forte  | 60,89652015 | 122,78182 | 4,70833 | 54,00090  | 298,30902 | 121,74776 | 9,35211  |
| 2013 | LureAlbion | LT13 | Vacheres | 7  | JO | NA | forte  | 11,85302198 | 64,70303  | 1,56525 | 38,51341  | 319,13056 | 118,23535 | 10,00778 |
| 2013 | LureAlbion | LT13 | Vacheres | 7  | JO | NA | forte  | 23,48809524 | NA        | 4,25252 | 35,70236  | NA        | 114,38379 | 15,48672 |
| 2013 | LureAlbion | LT13 | Vacheres | 7  | JO | NA | forte  | 9,163003663 | NA        | 4,17720 | 115,38450 | NA        | 119,19491 | 9,31777  |
| 2013 | LureAlbion | LT13 | Vacheres | 7  | JO | NA | forte  | 48,81227106 | NA        | 3,84787 | 100,04336 | NA        | 119,15526 | 10,43864 |

|      |            |      |                |    |    |    |        |             |           |         |           |            |           |          |
|------|------------|------|----------------|----|----|----|--------|-------------|-----------|---------|-----------|------------|-----------|----------|
| 2013 | LureAlbion | LT13 | Vacheres       | 7  | JO | NA | forte  | 103,6098901 | NA        | NA      | 87,15932  | NA         | 124,86790 | 8,92995  |
| 2013 | LureAlbion | LT13 | Vacheres       | 7  | JO | NA | forte  | 51,65567766 | NA        | NA      | NA        | NA         | 104,84812 | 8,84661  |
| 2013 | LureAlbion | LT13 | Vacheres       | 11 | JO | NA | forte  | 116,0521978 | 82,80606  | 4,90591 | 117,24144 | 451,18530  | 129,88396 | 7,55952  |
| 2013 | LureAlbion | LT13 | Vacheres       | 11 | JO | NA | forte  | 136,4217033 | 48,79394  | 5,15282 | 127,02333 | 569,91508  | 130,33618 | 8,04167  |
| 2013 | LureAlbion | LT13 | Vacheres       | 11 | JO | NA | forte  | 97,81868132 | 71,17576  | 5,34844 | 126,07950 | 435,33077  | 129,50539 | 6,64332  |
| 2013 | LureAlbion | LT13 | Vacheres       | 11 | JO | NA | forte  | 93,27289377 | 67,24040  | 5,19780 | 112,80424 | 554,71968  | 133,37634 | 8,08379  |
| 2013 | LureAlbion | LT13 | Vacheres       | 11 | JO | NA | forte  | 114,2481685 | 115,58384 | 4,92468 | 131,21639 | 465,09650  | 123,31957 | 8,50137  |
| 2013 | LureAlbion | LT13 | Vacheres       | 11 | JO | NA | forte  | 131,2774725 | 74,85455  | 5,62431 | 138,59270 | 180,77340  | 129,85724 | 10,90110 |
| 2013 | LureAlbion | LT13 | Vacheres       | 11 | JO | NA | forte  | 146,0375458 | 100,66263 | 6,20982 | 148,53070 | 373,02766  | 113,34979 | 6,57143  |
| 2013 | LureAlbion | LT13 | Vacheres       | 11 | JO | NA | forte  | 164,1456044 | 64,40404  | 6,10394 | 118,27141 | 502,89379  | 119,59187 | 6,80311  |
| 2013 | LureAlbion | LT13 | Vacheres       | 11 | JO | NA | forte  | 156,4056777 | NA        | 5,83860 | 124,35123 | NA         | 111,74909 | 4,65018  |
| 2013 | LureAlbion | LT13 | Vacheres       | 11 | JO | NA | forte  | 138,989011  | NA        | NA      | NA        | NA         | 142,52181 | 8,36058  |
| 2013 | LureAlbion | LT13 | Vacheres       | 17 | JO | NA | forte  | 136,6895604 | 113,85455 | 5,59913 | 127,26925 | 417,89767  | 114,80902 | 10,49405 |
| 2013 | LureAlbion | LT13 | Vacheres       | 17 | JO | NA | forte  | 146,5576923 | 104,06061 | 6,49622 | 134,73826 | 196,28890  | 123,81460 | 12,23901 |
| 2013 | LureAlbion | LT13 | Vacheres       | 17 | JO | NA | forte  | 131,489011  | 87,10303  | 5,34032 | 103,22349 | 507,39287  | 117,53540 | 13,20788 |
| 2013 | LureAlbion | LT13 | Vacheres       | 17 | JO | NA | forte  | 134,5521978 | 38,64848  | 5,91621 | 132,20772 | 607,17185  | 129,41877 | 10,93223 |
| 2013 | LureAlbion | LT13 | Vacheres       | 17 | JO | NA | forte  | 107,2912088 | 158,89091 | 5,95536 | 141,83698 | 576,90688  | 117,37265 | 11,64652 |
| 2013 | LureAlbion | LT13 | Vacheres       | 17 | JO | NA | forte  | NA          | 6,30909   | 4,98661 | 113,29026 | 12,37227   | 121,24240 | 12,69849 |
| 2013 | LureAlbion | LT13 | Vacheres       | 17 | JO | NA | forte  | 103,6057692 | NA        | 1,27747 | 125,23268 | NA         | 117,45075 | NA       |
| 2013 | LureAlbion | LT13 | Vacheres       | 17 | JO | NA | forte  | NA          | NA        | 1,33333 | 130,67579 | NA         | 117,24309 | NA       |
| 2013 | LureAlbion | LT13 | Vacheres       | 17 | JO | NA | forte  | NA          | NA        | 1,36985 | 129,14648 | NA         | 117,78818 | NA       |
| 2013 | LureAlbion | LT13 | Vacheres       | 17 | JO | NA | forte  | NA          | NA        | 1,41690 | 123,07428 | NA         | 123,99262 | NA       |
| 2013 | LureAlbion | LT13 | Vacheres       | 2  | JO | NA | forte  | 96,17582418 | 89,84242  | 5,24794 | 114,75660 | 799,30629  | 70,03978  | 16,10920 |
| 2013 | LureAlbion | LT13 | Vacheres       | 2  | JO | NA | forte  | 134,9239927 | 75,49697  | 5,40762 | 108,76562 | 818,87663  | 67,53779  | 13,07692 |
| 2013 | LureAlbion | LT13 | Vacheres       | 2  | JO | NA | forte  | 94,88049451 | 72,29091  | 4,63347 | 116,55774 | 699,58978  | 62,75674  | 8,55014  |
| 2013 | LureAlbion | LT13 | Vacheres       | 2  | JO | NA | forte  | 91,80952381 | 84,97576  | 5,33654 | 107,13137 | 481,24035  | 69,88076  | 12,19734 |
| 2013 | LureAlbion | LT13 | Vacheres       | 2  | JO | NA | forte  | 97,74038462 | 78,44848  | 4,75206 | 118,28877 | 629,21849  | 65,45159  | 10,47024 |
| 2013 | LureAlbion | LT13 | Vacheres       | 2  | JO | NA | forte  | 109,8516484 | 50,18788  | 5,16255 | 113,07934 | 626,34984  | 58,78648  | 8,65842  |
| 2013 | LureAlbion | LT13 | Vacheres       | 2  | JO | NA | forte  | 114,6721612 | 42,24242  | 6,00504 | 117,59277 | 159,84827  | 64,69636  | 9,81410  |
| 2013 | LureAlbion | LT13 | Vacheres       | 2  | JO | NA | forte  | 95,27380952 | 66,32323  | 5,04636 | 124,47923 | 685,76731  | 63,92161  | 7,90934  |
| 2013 | LureAlbion | LT13 | Vacheres       | 2  | JO | NA | forte  | 93,68543956 | NA        | 5,04945 | 122,03712 | 494,81679  | 69,95665  | 11,31181 |
| 2013 | LureAlbion | LT13 | Vacheres       | 2  | JO | NA | forte  | 103,7321429 | NA        | NA      | 116,98372 | NA         | 66,21180  | 10,48993 |
| 2013 | Valensole  | VX13 | PuimoissonBord | 17 | JO | NA | faible | 108,9642857 | 59,43636  | 5,85462 | 122,31241 | 1742,50173 | 69,96808  | 9,35485  |
| 2013 | Valensole  | VX13 | PuimoissonBord | 17 | JO | NA | faible | 97,60989011 | 55,31313  | 5,52266 | 116,47729 | 894,48908  | 70,42584  | 10,51374 |
| 2013 | Valensole  | VX13 | PuimoissonBord | 17 | JO | NA | faible | 117,2545788 | 62,80000  | 5,32005 | 123,48274 | 1284,56766 | 72,51023  | 12,24588 |
| 2013 | Valensole  | VX13 | PuimoissonBord | 17 | JO | NA | faible | 99,11721612 | 62,58788  | 5,55460 | 119,42487 | 681,87052  | 64,50416  | 7,32349  |
| 2013 | Valensole  | VX13 | PuimoissonBord | 17 | JO | NA | faible | 109,2106227 | 46,76364  | 5,91255 | 120,65348 | 1211,80488 | 69,12479  | 12,11813 |
| 2013 | Valensole  | VX13 | PuimoissonBord | 17 | JO | NA | faible | 102,7124542 | 46,50303  | 5,78777 | 120,84282 | 1052,29574 | 70,44153  | 9,23260  |
| 2013 | Valensole  | VX13 | PuimoissonBord | 17 | JO | NA | faible | 120,4766484 | 49,09091  | 5,76946 | 123,29796 | 773,37369  | 59,12576  | 8,34341  |
| 2013 | Valensole  | VX13 | PuimoissonBord | 17 | JO | NA | faible | 108,2129121 | 62,81818  | 5,33745 | 123,20084 | 1371,85366 | 76,77583  | 9,84615  |
| 2013 | Valensole  | VX13 | PuimoissonBord | 17 | JO | NA | faible | 119,2403846 | NA        | 5,58539 | 123,06919 | 1086,09639 | 64,72423  | 9,26099  |

|      |           |      |                |    |    |    |        |             |           |         |           |            |           |          |
|------|-----------|------|----------------|----|----|----|--------|-------------|-----------|---------|-----------|------------|-----------|----------|
| 2013 | Valensole | VX13 | PuimoissonBord | 17 | JO | NA | faible | 105,1840659 | NA        | 5,76351 | 122,52152 | 954,14829  | 68,05529  | 7,81319  |
| 2013 | Valensole | VX13 | PuimoissonBord | 16 | JO | NA | faible | 119,0695971 | 51,18788  | 6,12866 | 130,84961 | 976,12703  | 70,92806  | 9,03571  |
| 2013 | Valensole | VX13 | PuimoissonBord | 16 | JO | NA | faible | 116,7435897 | 80,82424  | 5,62088 | 125,71372 | 182,65869  | 71,41142  | 8,01282  |
| 2013 | Valensole | VX13 | PuimoissonBord | 16 | JO | NA | faible | 119,3379121 | 27,84848  | 5,16346 | 115,08082 | 577,80030  | 61,06953  | 6,82280  |
| 2013 | Valensole | VX13 | PuimoissonBord | 16 | JO | NA | faible | 118,7216117 | 42,97576  | 5,00298 | 120,12804 | 923,51032  | 65,90832  | 12,03480 |
| 2013 | Valensole | VX13 | PuimoissonBord | 16 | JO | NA | faible | 106,8379121 | 57,45455  | 5,53480 | 121,47931 | 577,20064  | 75,57017  | 7,56662  |
| 2013 | Valensole | VX13 | PuimoissonBord | 16 | JO | NA | faible | 117,9587912 | 38,07677  | 7,10256 | 123,08258 | 854,80775  | 76,58735  | 12,54258 |
| 2013 | Valensole | VX13 | PuimoissonBord | 16 | JO | NA | faible | 99,19413919 | 21,65455  | 5,22218 | 125,27149 | 362,47471  | 68,51101  | 5,45284  |
| 2013 | Valensole | VX13 | PuimoissonBord | 16 | JO | NA | faible | 92,10989011 | 29,81414  | 5,39721 | 119,76145 | 1333,52109 | 63,40968  | 6,65453  |
| 2013 | Valensole | VX13 | PuimoissonBord | 16 | JO | NA | faible | 101,706044  | NA        | 4,91232 | 120,02561 | 957,78277  | 66,48972  | 8,50046  |
| 2013 | Valensole | VX13 | PuimoissonBord | 16 | JO | NA | faible | NA          | NA        | 6,29373 | 130,01378 | NA         | 66,62733  | 6,14148  |
| 2013 | Valensole | VX13 | PuimoissonBord | 9  | JO | NA | faible | 83,43040293 | 47,90909  | 4,12191 | 97,55593  | 1634,81497 | 108,27597 | 9,82555  |
| 2013 | Valensole | VX13 | PuimoissonBord | 9  | JO | NA | faible | 88,85714286 | 62,82020  | 6,53800 | 111,65624 | 1295,32841 | 105,33393 | 8,02816  |
| 2013 | Valensole | VX13 | PuimoissonBord | 9  | JO | NA | faible | 142,7019231 | 86,90101  | 5,26740 | 130,41649 | 1272,22662 | 123,28232 | 6,46337  |
| 2013 | Valensole | VX13 | PuimoissonBord | 9  | JO | NA | faible | 103,8956044 | 51,02424  | 4,87019 | 126,89143 | 1033,66185 | 116,73433 | 7,71016  |
| 2013 | Valensole | VX13 | PuimoissonBord | 9  | JO | NA | faible | 94,62774725 | 69,44242  | 3,93407 | 126,82565 | 1619,31988 | 119,97654 | 10,38462 |
| 2013 | Valensole | VX13 | PuimoissonBord | 9  | JO | NA | faible | 107,2188645 | 44,90101  | 5,73878 | 120,46607 | 1035,10252 | 121,33612 | 9,22436  |
| 2013 | Valensole | VX13 | PuimoissonBord | 9  | JO | NA | faible | 87,52838828 | 46,75758  | 5,90545 | 117,50124 | 1194,45384 | 122,00291 | 11,45879 |
| 2013 | Valensole | VX13 | PuimoissonBord | 9  | JO | NA | faible | 113,8095238 | 80,29697  | 5,02679 | 113,85004 | 832,74727  | 128,11682 | 9,09295  |
| 2013 | Valensole | VX13 | PuimoissonBord | 9  | JO | NA | faible | 111,0283883 | 83,25455  | NA      | 130,40841 | NA         | 108,85494 | 7,78251  |
| 2013 | Valensole | VX13 | PuimoissonBord | 9  | JO | NA | faible | 93,82967033 | 54,53333  | NA      | 128,16075 | NA         | 120,21286 | 9,63828  |
| 2013 | Valensole | VX13 | PuimoissonBord | 12 | JO | NA | faible | 94,25       | 96,14545  | 5,00321 | 130,47962 | 357,31239  | 92,78036  | 9,17582  |
| 2013 | Valensole | VX13 | PuimoissonBord | 12 | JO | NA | faible | 106,2362637 | 57,58788  | 5,21051 | 131,79894 | 642,14141  | 100,76229 | 9,53503  |
| 2013 | Valensole | VX13 | PuimoissonBord | 12 | JO | NA | faible | 93,05586081 | 52,13333  | 4,73626 | 128,40235 | 383,37313  | 100,86608 | 6,68681  |
| 2013 | Valensole | VX13 | PuimoissonBord | 12 | JO | NA | faible | 116,8800366 | 40,66667  | 5,30540 | 127,21677 | 275,86739  | 95,87661  | 9,04716  |
| 2013 | Valensole | VX13 | PuimoissonBord | 12 | JO | NA | faible | 82,76236264 | 53,63030  | 4,44322 | 146,65394 | NA         | 32,73714  | NA       |
| 2013 | Valensole | VX13 | PuimoissonBord | 12 | JO | NA | faible | 107,4958791 | NA        | 5,44299 | 141,21392 | 364,19688  | 107,09613 | 8,76923  |
| 2013 | Valensole | VX13 | PuimoissonBord | 12 | JO | NA | faible | 138,6364469 | 61,88485  | 6,44460 | 135,04917 | 696,27516  | 101,01809 | 7,70925  |
| 2013 | Valensole | VX13 | PuimoissonBord | 12 | JO | NA | faible | 112,7380952 | 76,76970  | 4,74611 | 143,41413 | 502,25579  | 81,18491  | 8,59135  |
| 2013 | Valensole | VX13 | PuimoissonBord | 12 | JO | NA | faible | 127,6391941 | 122,01212 | 6,18109 | 121,92003 | 661,85510  | 89,86436  | 8,23352  |
| 2013 | Valensole | VX13 | PuimoissonBord | 12 | JO | NA | faible | 124,385989  | NA        | 5,16930 | NA        | 415,02676  | 95,71058  | 9,60096  |
| 2013 | Valensole | VX13 | PuimoissonBord | 7  | JO | NA | faible | 109,1630037 | 86,39596  | 4,70902 | 123,39986 | 1041,25248 | 130,59535 | 6,44231  |
| 2013 | Valensole | VX13 | PuimoissonBord | 7  | JO | NA | faible | 103,3095238 | 76,35758  | 5,02427 | 125,80293 | 1232,39823 | 124,04911 | 7,38118  |
| 2013 | Valensole | VX13 | PuimoissonBord | 7  | JO | NA | faible | 150,2875458 | 136,70303 | 7,59684 | 141,21041 | 764,82671  | 116,23477 | 6,49107  |
| 2013 | Valensole | VX13 | PuimoissonBord | 7  | JO | NA | faible | 110,0705128 | 67,10303  | 4,90041 | 128,76957 | 927,22590  | 121,01569 | 6,87225  |
| 2013 | Valensole | VX13 | PuimoissonBord | 7  | JO | NA | faible | 94,66575092 | 81,64848  | 4,95192 | 128,14057 | 719,79768  | 117,71473 | 5,47734  |
| 2013 | Valensole | VX13 | PuimoissonBord | 7  | JO | NA | faible | 42,7032967  | 45,58182  | 3,70238 | 122,61859 | 818,44610  | 105,66951 | 7,89286  |
| 2013 | Valensole | VX13 | PuimoissonBord | 7  | JO | NA | faible | NA          | NA        | 1,23180 | 42,97409  | NA         | 30,99933  | NA       |
| 2013 | Valensole | VX13 | PuimoissonBord | 7  | JO | NA | faible | NA          | 7,01818   | 1,18441 | 32,81932  | NA         | 34,44774  | NA       |
| 2013 | Valensole | VX13 | PuimoissonBord | 7  | JO | NA | faible | NA          | NA        | 1,16655 | 48,88211  | NA         | NA        | NA       |
| 2013 | Valensole | VX13 | PuimoissonBord | 7  | JO | NA | faible | NA          | NA        | 1,29190 | NA        | NA         | NA        | NA       |

|      |           |      |                |    |    |    |       |             |          |         |           |            |           |          |
|------|-----------|------|----------------|----|----|----|-------|-------------|----------|---------|-----------|------------|-----------|----------|
| 2013 | Valensole | VX13 | PuimoissonBord | 3  | JO | NA | forte | 126,0457875 | 47,43636 | 6,34890 | 19,71478  | 663,01117  | 46,63067  | 14,18178 |
| 2013 | Valensole | VX13 | PuimoissonBord | 3  | JO | NA | forte | 77,02197802 | 58,54545 | 5,93407 | 13,09657  | 489,24600  | 44,34525  | 6,61676  |
| 2013 | Valensole | VX13 | PuimoissonBord | 3  | JO | NA | forte | 120,75      | 34,99394 | 6,45055 | NA        | 691,09976  | 43,70704  | 6,47940  |
| 2013 | Valensole | VX13 | PuimoissonBord | 3  | JO | NA | forte | 106,7142857 | 35,45455 | 5,69402 | NA        | 511,57243  | 43,61523  | 7,83654  |
| 2013 | Valensole | VX13 | PuimoissonBord | 3  | JO | NA | forte | 123,4986264 | 46,67879 | 6,25114 | NA        | 717,90807  | 40,21617  | 18,84066 |
| 2013 | Valensole | VX13 | PuimoissonBord | 3  | JO | NA | forte | 120,4679487 | NA       | 6,83150 | NA        | 511,98135  | 43,54965  | 9,19414  |
| 2013 | Valensole | VX13 | PuimoissonBord | 3  | JO | NA | forte | 108,7362637 | NA       | 6,07486 | NA        | 803,06122  | 44,44560  | 8,14240  |
| 2013 | Valensole | VX13 | PuimoissonBord | 3  | JO | NA | forte | 139,9624542 | NA       | 6,37019 | NA        | NA         | 43,27853  | 7,55861  |
| 2013 | Valensole | VX13 | PuimoissonBord | 3  | JO | NA | forte | 123,0989011 | NA       | 5,97299 | NA        | NA         | NA        | NA       |
| 2013 | Valensole | VX13 | PuimoissonBord | 3  | JO | NA | forte | 104,1025641 | NA       | NA      | NA        | NA         | NA        | NA       |
| 2013 | Valensole | VX13 | PuimoissonBord | 18 | JO | NA | forte | 104,6336996 | 31,12121 | 5,83585 | 15,07224  | 876,78046  | 52,58955  | 7,39973  |
| 2013 | Valensole | VX13 | PuimoissonBord | 18 | JO | NA | forte | 119,9217033 | 36,13333 | 5,46497 | 11,47205  | 1103,77849 | 48,23267  | 12,54258 |
| 2013 | Valensole | VX13 | PuimoissonBord | 18 | JO | NA | forte | 51,03983516 | 73,45859 | 6,14320 | NA        | 898,89764  | 48,74585  | 6,22024  |
| 2013 | Valensole | VX13 | PuimoissonBord | 18 | JO | NA | forte | 83,21291209 | 37,15758 | 4,94528 | 23,33033  | 577,25020  | 47,36398  | 6,51099  |
| 2013 | Valensole | VX13 | PuimoissonBord | 18 | JO | NA | forte | 98,16620879 | 39,30303 | 5,64812 | NA        | 1224,98300 | 52,20179  | 8,11905  |
| 2013 | Valensole | VX13 | PuimoissonBord | 18 | JO | NA | forte | 120,5961538 | 40,09697 | 6,44368 | NA        | 921,97056  | 56,81431  | 6,90018  |
| 2013 | Valensole | VX13 | PuimoissonBord | 18 | JO | NA | forte | 155,407967  | 33,48485 | 6,23249 | NA        | 775,50107  | 33,46118  | 10,46978 |
| 2013 | Valensole | VX13 | PuimoissonBord | 18 | JO | NA | forte | 122,8667582 | NA       | 5,65224 | NA        | 1001,22995 | 59,45317  | 7,56364  |
| 2013 | Valensole | VX13 | PuimoissonBord | 18 | JO | NA | forte | NA          | NA       | NA      | NA        | 1250,52748 | 34,47128  | 9,88553  |
| 2013 | Valensole | VX13 | PuimoissonBord | 18 | JO | NA | forte | NA          | NA       | NA      | NA        | NA         | NA        | 10,85485 |
| 2013 | Valensole | VX13 | PuimoissonBord | 13 | JO | NA | forte | 130,1730769 | 53,01212 | 6,35165 | 23,84481  | 662,22309  | 49,09406  | 9,29167  |
| 2013 | Valensole | VX13 | PuimoissonBord | 13 | JO | NA | forte | 110,1456044 | 41,36364 | 5,22562 | 10,94778  | 1099,56168 | 46,98340  | 9,07875  |
| 2013 | Valensole | VX13 | PuimoissonBord | 13 | JO | NA | forte | 125,9725275 | 51,39798 | 6,23317 | 18,39354  | NA         | 55,51412  | NA       |
| 2013 | Valensole | VX13 | PuimoissonBord | 13 | JO | NA | forte | 94,125      | 39,75758 | 5,21703 | NA        | 1394,22441 | 58,56109  | 12,34799 |
| 2013 | Valensole | VX13 | PuimoissonBord | 13 | JO | NA | forte | 108,2582418 | 28,29091 | 7,15282 | NA        | 879,77744  | 57,32645  | 12,75046 |
| 2013 | Valensole | VX13 | PuimoissonBord | 13 | JO | NA | forte | 47,90384615 | 11,12727 | 5,32040 | NA        | 909,11478  | 54,79542  | 7,84799  |
| 2013 | Valensole | VX13 | PuimoissonBord | 13 | JO | NA | forte | 8,451923077 | 42,21212 | 1,50103 | NA        | 823,16024  | 54,99252  | 6,95375  |
| 2013 | Valensole | VX13 | PuimoissonBord | 13 | JO | NA | forte | 45,58791209 | NA       | 0,79911 | NA        | 748,67655  | 50,24182  | 8,96658  |
| 2013 | Valensole | VX13 | PuimoissonBord | 13 | JO | NA | forte | 24,03434066 | NA       | 4,85714 | NA        | 790,53301  | 46,72360  | 7,39332  |
| 2013 | Valensole | VX13 | PuimoissonBord | 13 | JO | NA | forte | NA          | NA       | 2,10714 | NA        | NA         | 58,35058  | NA       |
| 2013 | Valensole | VX13 | PuimoissonBord | 14 | JO | NA | forte | 93,83516484 | 51,57576 | 5,76236 | 98,79990  | 288,51701  | 114,12374 | 4,92651  |
| 2013 | Valensole | VX13 | PuimoissonBord | 14 | JO | NA | forte | 115,8443223 | 27,87879 | 5,18235 | 108,21887 | 450,75639  | 119,31788 | 6,54670  |
| 2013 | Valensole | VX13 | PuimoissonBord | 14 | JO | NA | forte | 10,73076923 | 24,45455 | 1,11813 | 27,97432  | 259,91733  | 113,53124 | 4,08425  |
| 2013 | Valensole | VX13 | PuimoissonBord | 14 | JO | NA | forte | 48,12912088 | 45,62424 | 5,24073 | 91,67928  | 563,77726  | 123,38896 | 8,83173  |
| 2013 | Valensole | VX13 | PuimoissonBord | 14 | JO | NA | forte | 58,34615385 | NA       | 6,49222 | 112,07969 | 580,20634  | 123,38807 | 8,04579  |
| 2013 | Valensole | VX13 | PuimoissonBord | 14 | JO | NA | forte | 63,19093407 | NA       | 5,40041 | 82,73395  | 398,46547  | 118,60667 | 4,83974  |
| 2013 | Valensole | VX13 | PuimoissonBord | 14 | JO | NA | forte | 14,41483516 | NA       | 1,81319 | 45,96865  | NA         | 127,01425 | 5,83516  |
| 2013 | Valensole | VX13 | PuimoissonBord | 14 | JO | NA | forte | 31,59981685 | NA       | 3,05357 | 75,31489  | NA         | 121,06093 | 7,68132  |
| 2013 | Valensole | VX13 | PuimoissonBord | 14 | JO | NA | forte | 72,62362637 | NA       | 5,75584 | 115,78085 | NA         | 123,65062 | 6,64515  |
| 2013 | Valensole | VX13 | PuimoissonBord | 14 | JO | NA | forte | 71,67948718 | NA       | 5,28411 | 100,83159 | NA         | 126,82908 | 8,51190  |
| 2013 | Valensole | VX13 | PuimoissonBord | 1  | JO | NA | forte | 75,11263736 | 37,01414 | 5,41690 | 102,89728 | 740,58829  | 110,53749 | 4,03892  |

|      |           |      |                |    |    |    |        |             |           |         |           |            |           |          |
|------|-----------|------|----------------|----|----|----|--------|-------------|-----------|---------|-----------|------------|-----------|----------|
| 2013 | Valensole | VX13 | PuimoissonBord | 1  | JO | NA | forte  | 92,52197802 | 64,18182  | 7,11367 | 124,27123 | 331,27412  | 139,91929 | 4,19437  |
| 2013 | Valensole | VX13 | PuimoissonBord | 1  | JO | NA | forte  | 44,49175824 | 53,43030  | 3,76786 | 84,40636  | 674,36560  | 126,13929 | 6,57875  |
| 2013 | Valensole | VX13 | PuimoissonBord | 1  | JO | NA | forte  | 78,12271062 | 72,18788  | 4,69265 | 87,27637  | 594,09598  | 112,16936 | 8,42720  |
| 2013 | Valensole | VX13 | PuimoissonBord | 1  | JO | NA | forte  | 88,06501832 | 63,84242  | 5,90797 | 102,76712 | 391,12099  | 102,44030 | 9,40064  |
| 2013 | Valensole | VX13 | PuimoissonBord | 1  | JO | NA | forte  | 146,3777473 | NA        | 6,74382 | 121,07153 | 693,43386  | 119,16360 | 10,11172 |
| 2013 | Valensole | VX13 | PuimoissonBord | 1  | JO | NA | forte  | 145,2106227 | NA        | 6,50824 | 118,64752 | 608,45976  | 128,07782 | 6,88874  |
| 2013 | Valensole | VX13 | PuimoissonBord | 1  | JO | NA | forte  | 147,7490842 | NA        | 5,80701 | 111,23255 | 571,32816  | 126,65177 | 8,54533  |
| 2013 | Valensole | VX13 | PuimoissonBord | 1  | JO | NA | forte  | 141,764652  | NA        | 6,80861 | 130,90634 | NA         | 112,31073 | 3,09341  |
| 2013 | Valensole | VX13 | PuimoissonBord | 1  | JO | NA | forte  | 135,2884615 | NA        | 6,44322 | 123,89501 | NA         | 128,13071 | NA       |
| 2013 | Valensole | VP13 | Roumoules      | 4  | JO | NA | faible | 162,6909341 | 84,27273  | 6,55449 | 139,65930 | 909,03158  | 138,04858 | 8,26557  |
| 2013 | Valensole | VP13 | Roumoules      | 4  | JO | NA | faible | 155,2348901 | 73,78788  | 7,05048 | 137,28904 | 417,89969  | 130,69853 | 6,60073  |
| 2013 | Valensole | VP13 | Roumoules      | 4  | JO | NA | faible | 148,7870879 | 98,43636  | 6,79647 | 123,33973 | 775,80890  | 130,22225 | 9,19918  |
| 2013 | Valensole | VP13 | Roumoules      | 4  | JO | NA | faible | 163,0238095 | 85,33737  | 8,54762 | 154,55820 | 449,82815  | 136,36324 | 6,81525  |
| 2013 | Valensole | VP13 | Roumoules      | 4  | JO | NA | faible | 131,0686813 | 67,32121  | 6,10531 | 117,65545 | 711,21277  | 142,10038 | 7,15842  |
| 2013 | Valensole | VP13 | Roumoules      | 4  | JO | NA | faible | 89,00549451 | 100,33131 | 5,80357 | 114,44305 | 350,74309  | 138,62124 | 7,34295  |
| 2013 | Valensole | VP13 | Roumoules      | 4  | JO | NA | faible | 81,08104396 | 74,46061  | 6,42926 | 123,08991 | 443,01176  | 124,45950 | 6,25504  |
| 2013 | Valensole | VP13 | Roumoules      | 4  | JO | NA | faible | 130,7431319 | 65,60000  | 7,09386 | 134,81903 | 674,20827  | 126,53882 | 8,23260  |
| 2013 | Valensole | VP13 | Roumoules      | 4  | JO | NA | faible | 131,228022  | 106,73939 | 6,29052 | 117,45883 | NA         | 138,35879 | 6,24107  |
| 2013 | Valensole | VP13 | Roumoules      | 4  | JO | NA | faible | 67,48351648 | NA        | 5,80472 | NA        | NA         | 143,69861 | 7,87821  |
| 2013 | Valensole | VP13 | Roumoules      | 2  | JO | NA | faible | 68,90796703 | 37,37576  | 4,81525 | 94,25514  | 983,20285  | 162,62312 | 9,80540  |
| 2013 | Valensole | VP13 | Roumoules      | 2  | JO | NA | faible | 66,48901099 | 58,39192  | 5,39377 | 101,37433 | 1333,58151 | 200,54770 | 12,77793 |
| 2013 | Valensole | VP13 | Roumoules      | 2  | JO | NA | faible | 124,0425824 | 50,28283  | 5,91964 | 106,96164 | 606,09233  | 139,33221 | 7,07830  |
| 2013 | Valensole | VP13 | Roumoules      | 2  | JO | NA | faible | 89,1771978  | 46,40808  | 5,13919 | 100,83819 | 890,15681  | 144,97467 | 6,86813  |
| 2013 | Valensole | VP13 | Roumoules      | 2  | JO | NA | faible | 105,7664835 | 37,52121  | 5,55666 | 107,99685 | 812,16982  | 123,74081 | 6,24817  |
| 2013 | Valensole | VP13 | Roumoules      | 2  | JO | NA | faible | 134,4244505 | 60,12121  | 5,95913 | 113,82150 | 1067,31285 | 127,60030 | 5,70673  |
| 2013 | Valensole | VP13 | Roumoules      | 2  | JO | NA | faible | 101,5192308 | 52,32727  | 5,34203 | 122,07899 | 904,89651  | 165,15667 | 8,86195  |
| 2013 | Valensole | VP13 | Roumoules      | 2  | JO | NA | faible | 150,3406593 | 74,39394  | 6,10749 | 106,31932 | NA         | 167,76907 | 8,82418  |
| 2013 | Valensole | VP13 | Roumoules      | 2  | JO | NA | faible | 89,41117216 | 57,88485  | 5,11470 | 113,54442 | NA         | 161,54639 | 9,85989  |
| 2013 | Valensole | VP13 | Roumoules      | 2  | JO | NA | faible | 94,45970696 | NA        | 5,72092 | NA        | NA         | 173,09157 | 8,89377  |
| 2013 | Valensole | VP13 | Roumoules      | 17 | JO | NA | faible | 138,4880952 | 86,67273  | 5,85027 | 111,93658 | 821,00439  | 162,94952 | 11,09295 |
| 2013 | Valensole | VP13 | Roumoules      | 17 | JO | NA | faible | 101,4056777 | 89,70909  | 5,58379 | 109,76635 | 468,44667  | 142,86752 | 7,12225  |
| 2013 | Valensole | VP13 | Roumoules      | 17 | JO | NA | faible | 68,67673993 | 65,21616  | 4,51534 | 105,01403 | 843,95207  | 158,19015 | 14,50687 |
| 2013 | Valensole | VP13 | Roumoules      | 17 | JO | NA | faible | 65,99587912 | 74,68485  | 7,10806 | 104,56885 | 764,58258  | 157,40779 | 10,87592 |
| 2013 | Valensole | VP13 | Roumoules      | 17 | JO | NA | faible | 151,9734432 | 59,05859  | 9,70604 | 122,80829 | 1040,42348 | 184,83779 | 22,10668 |
| 2013 | Valensole | VP13 | Roumoules      | 17 | JO | NA | faible | 97,26831502 | 75,19394  | 6,36676 | 125,38167 | 922,30543  | 212,03238 | 32,46795 |
| 2013 | Valensole | VP13 | Roumoules      | 17 | JO | NA | faible | 133,2815934 | 88,88485  | 5,67102 | 126,84626 | 1812,90119 | 142,26646 | 9,88645  |
| 2013 | Valensole | VP13 | Roumoules      | 17 | JO | NA | faible | 135,1776557 | NA        | 5,74496 | 115,34594 | 1202,88124 | 220,98544 | 29,82647 |
| 2013 | Valensole | VP13 | Roumoules      | 17 | JO | NA | faible | 136,771978  | NA        | 6,61310 | 121,06857 | 1171,77067 | 180,89073 | 14,90522 |
| 2013 | Valensole | VP13 | Roumoules      | 17 | JO | NA | faible | 124,2774725 | NA        | NA      | 123,96817 | NA         | 169,22080 | 12,56410 |
| 2013 | Valensole | VP13 | Roumoules      | 8  | JO | NA | faible | 132,8031136 | 76,18182  | 6,34707 | 121,89176 | 778,75355  | 149,14726 | 7,52427  |
| 2013 | Valensole | VP13 | Roumoules      | 8  | JO | NA | faible | 142,2985348 | 117,28485 | 6,68613 | 128,41390 | 536,76175  | 116,03223 | 6,19048  |

|      |           |      |           |    |    |    |        |             |           |          |           |            |           |          |
|------|-----------|------|-----------|----|----|----|--------|-------------|-----------|----------|-----------|------------|-----------|----------|
| 2013 | Valensole | VP13 | Roumoules | 8  | JO | NA | faible | 151,1474359 | 73,15758  | 6,39927  | 125,60531 | 718,98917  | 153,14733 | 14,75183 |
| 2013 | Valensole | VP13 | Roumoules | 8  | JO | NA | faible | 155,3351648 | 40,80606  | 7,48764  | 111,54453 | 1499,20365 | 183,85215 | 7,74176  |
| 2013 | Valensole | VP13 | Roumoules | 8  | JO | NA | faible | 70,95970696 | 100,27273 | 6,14721  | 130,84629 | 1353,93187 | 160,88916 | 11,95192 |
| 2013 | Valensole | VP13 | Roumoules | 8  | JO | NA | faible | 109,5274725 | 33,19394  | 5,38965  | 111,45351 | 1383,14142 | 161,15207 | 9,13049  |
| 2013 | Valensole | VP13 | Roumoules | 8  | JO | NA | faible | 47,60164835 | 61,33939  | 4,70879  | 98,89233  | 1311,81450 | 173,32935 | 14,11813 |
| 2013 | Valensole | VP13 | Roumoules | 8  | JO | NA | faible | 96,58241758 | NA        | NA       | 118,29460 | 1239,25851 | 175,90076 | 6,45925  |
| 2013 | Valensole | VP13 | Roumoules | 8  | JO | NA | faible | 47,74175824 | NA        | NA       | 105,81641 | 1954,13080 | 187,84135 | NA       |
| 2013 | Valensole | VP13 | Roumoules | 8  | JO | NA | faible | 3,839285714 | NA        | NA       | NA        | 576,03850  | 132,74267 | NA       |
| 2013 | Valensole | VP13 | Roumoules | 19 | JO | NA | faible | 67,22664835 | 102,81212 | 6,92697  | 114,99348 | 447,05043  | 132,29268 | 11,96183 |
| 2013 | Valensole | VP13 | Roumoules | 19 | JO | NA | faible | 179,0732601 | 90,45657  | 9,38965  | 34,78444  | 495,50601  | 134,62369 | 10,72873 |
| 2013 | Valensole | VP13 | Roumoules | 19 | JO | NA | faible | 179,6547619 | 104,22626 | 9,62477  | 162,48851 | 1046,77395 | 151,28454 | 11,40253 |
| 2013 | Valensole | VP13 | Roumoules | 19 | JO | NA | faible | 189,2335165 | 116,70303 | 10,03640 | 158,40233 | 844,69245  | 142,51985 | 7,83100  |
| 2013 | Valensole | VP13 | Roumoules | 19 | JO | NA | faible | 194,135989  | 45,07273  | 10,51328 | 169,35337 | 791,03258  | 142,31758 | 10,46008 |
| 2013 | Valensole | VP13 | Roumoules | 19 | JO | NA | faible | 58,28846154 | 46,76364  | 4,17548  | 160,31187 | 587,93979  | 131,59554 | 9,69376  |
| 2013 | Valensole | VP13 | Roumoules | 19 | JO | NA | faible | 82,27197802 | 64,61818  | 6,65591  | 122,11526 | 523,74781  | 148,25121 | 9,16404  |
| 2013 | Valensole | VP13 | Roumoules | 19 | JO | NA | faible | 139,0448718 | NA        | 7,42995  | 133,38273 | 660,12708  | 149,68823 | 10,72290 |
| 2013 | Valensole | VP13 | Roumoules | 19 | JO | NA | faible | 67,39972527 | NA        | 4,88255  | 148,21373 | 559,58267  | 150,94791 | 9,65676  |
| 2013 | Valensole | VP13 | Roumoules | 19 | JO | NA | faible | NA          | NA        | NA       | 120,43577 | NA         | 138,27607 | 11,90472 |
| 2013 | Valensole | VP13 | Roumoules | 16 | JO | NA | forte  | 181,6016484 | 76,58788  | 10,28915 | 172,88048 | 1265,11405 | 154,38023 | 5,93794  |
| 2013 | Valensole | VP13 | Roumoules | 16 | JO | NA | forte  | 198,4065934 | 65,79394  | 10,56296 | 166,16670 | 1578,34056 | 150,74759 | 9,42832  |
| 2013 | Valensole | VP13 | Roumoules | 16 | JO | NA | forte  | 108,4038462 | 74,30707  | 7,34226  | 147,22861 | 849,82909  | 144,14808 | 7,67220  |
| 2013 | Valensole | VP13 | Roumoules | 16 | JO | NA | forte  | 171,8580586 | 35,87273  | 9,92995  | 161,21003 | 821,29514  | 146,08344 | 6,74257  |
| 2013 | Valensole | VP13 | Roumoules | 16 | JO | NA | forte  | 28,29029304 | 29,23030  | 2,51786  | 66,31067  | 279,18875  | 129,05829 | 7,01486  |
| 2013 | Valensole | VP13 | Roumoules | 16 | JO | NA | forte  | 32,59615385 | 122,04242 | 2,99405  | 82,34286  | 811,13263  | 150,24751 | 12,56774 |
| 2013 | Valensole | VP13 | Roumoules | 16 | JO | NA | forte  | 227,2225275 | 59,25455  | 14,44437 | 191,84252 | 1060,69033 | 143,91469 | 14,30332 |
| 2013 | Valensole | VP13 | Roumoules | 16 | JO | NA | forte  | 39,99358974 | 59,34545  | 4,46451  | 105,62807 | 958,78442  | 134,39103 | 10,45542 |
| 2013 | Valensole | VP13 | Roumoules | 16 | JO | NA | forte  | 76,1492674  | NA        | 7,07040  | 141,22265 | 1336,98630 | 158,00905 | 6,01952  |
| 2013 | Valensole | VP13 | Roumoules | 16 | JO | NA | forte  | 191,8562271 | NA        | 9,30632  | 156,40694 | 1062,62231 | 143,91750 | NA       |
| 2013 | Valensole | VP13 | Roumoules | 10 | JO | NA | forte  | 204,8269231 | 86,94545  | 11,60302 | 178,88455 | 734,35621  | 151,51661 | 9,20367  |
| 2013 | Valensole | VP13 | Roumoules | 10 | JO | NA | forte  | 340,9478022 | 183,94545 | 6,64400  | 205,87621 | 280,97107  | 142,59962 | 7,85635  |
| 2013 | Valensole | VP13 | Roumoules | 10 | JO | NA | forte  | 165,9716117 | 70,53737  | 7,49725  | 173,35982 | 880,90325  | 142,81226 | 11,53977 |
| 2013 | Valensole | VP13 | Roumoules | 10 | JO | NA | forte  | 69,69047619 | 62,47677  | 1,33345  | 139,54099 | 1249,33633 | 158,06643 | 10,11801 |
| 2013 | Valensole | VP13 | Roumoules | 10 | JO | NA | forte  | 80,27655678 | 17,69091  | 1,10337  | 148,60732 | 453,93484  | 143,47644 | 11,75262 |
| 2013 | Valensole | VP13 | Roumoules | 10 | JO | NA | forte  | 14,87545788 | 27,29697  | 9,75183  | 38,70102  | 530,79137  | 144,70048 | 9,48572  |
| 2013 | Valensole | VP13 | Roumoules | 10 | JO | NA | forte  | 3,775641026 | 15,28485  | NA       | 40,46194  | 1083,41549 | 144,07927 | 9,05813  |
| 2013 | Valensole | VP13 | Roumoules | 10 | JO | NA | forte  | 11,67857143 | 57,83636  | NA       | 60,39480  | 672,47576  | 147,69068 | 11,01253 |
| 2013 | Valensole | VP13 | Roumoules | 10 | JO | NA | forte  | 167,6492674 | NA        | NA       | 159,34805 | NA         | 129,91543 | 10,79196 |
| 2013 | Valensole | VP13 | Roumoules | 10 | JO | NA | forte  | NA          | NA        | NA       | NA        | NA         | 122,77241 | 8,35664  |
| 2013 | Valensole | VP13 | Roumoules | 15 | JO | NA | forte  | 83,10805861 | 64,42424  | 7,13324  | 83,49214  | 690,54396  | 148,78493 | 12,43613 |
| 2013 | Valensole | VP13 | Roumoules | 15 | JO | NA | forte  | 125,4606227 | 60,09091  | 6,50515  | 99,29566  | 873,28004  | 159,30874 | 14,68910 |
| 2013 | Valensole | VP13 | Roumoules | 15 | JO | NA | forte  | 104,7101648 | 39,32121  | 6,63278  | 99,48300  | 916,70665  | 168,01809 | 11,01923 |

|                |      |           |    |     |    |              |             |           |         |           |            |           |          |
|----------------|------|-----------|----|-----|----|--------------|-------------|-----------|---------|-----------|------------|-----------|----------|
| 2013 Valensole | VP13 | Roumoules | 15 | JO  | NA | forte        | 153,0723443 | 70,20202  | 6,56021 | 106,02842 | 970,96419  | 158,19396 | 12,89194 |
| 2013 Valensole | VP13 | Roumoules | 15 | JO  | NA | forte        | 105,4986264 | 77,87879  | 6,50824 | 109,70406 | 662,71834  | 138,81178 | 10,73214 |
| 2013 Valensole | VP13 | Roumoules | 15 | JO  | NA | forte        | 96,09615385 | 92,82020  | 7,01717 | 106,90606 | 710,69115  | 158,75094 | 9,65339  |
| 2013 Valensole | VP13 | Roumoules | 15 | JO  | NA | forte        | 108,5151099 | 49,92727  | 6,78068 | 79,88815  | 809,52192  | 182,38201 | 12,00092 |
| 2013 Valensole | VP13 | Roumoules | 15 | JO  | NA | forte        | 148,0503663 | 57,01818  | 6,53125 | NA        | 918,66562  | 172,33146 | 9,09432  |
| 2013 Valensole | VP13 | Roumoules | 15 | JO  | NA | forte        | 70,64194139 | NA        | 7,02976 | NA        | 669,47309  | 164,59550 | 14,65751 |
| 2013 Valensole | VP13 | Roumoules | 15 | JO  | NA | forte        | 153,9880952 | NA        | 5,69231 | NA        | NA         | 179,74678 | 14,89286 |
| 2013 Valensole | VP13 | Roumoules | 6  | JO  | NA | forte        | 152,8543956 | 29,72525  | 6,63897 | 104,99152 | 628,51608  | 153,49310 | 10,21658 |
| 2013 Valensole | VP13 | Roumoules | 6  | JO  | NA | forte        | 158,5645604 | 45,10303  | 7,53537 | 115,43031 | 731,10768  | 176,08530 | 10,52656 |
| 2013 Valensole | VP13 | Roumoules | 6  | JO  | NA | forte        | 111,71337   | 45,73333  | 6,29911 | 108,87581 | 666,17858  | 173,98439 | 11,61310 |
| 2013 Valensole | VP13 | Roumoules | 6  | JO  | NA | forte        | 114,9450549 | 48,27879  | 5,66552 | 84,42617  | 883,36962  | 162,90637 | 11,90842 |
| 2013 Valensole | VP13 | Roumoules | 6  | JO  | NA | forte        | 89,75137363 | 32,18990  | 6,56216 | 90,77795  | 910,50108  | 178,22621 | 12,94460 |
| 2013 Valensole | VP13 | Roumoules | 6  | JO  | NA | forte        | 153,8974359 | 37,27273  | 7,16232 | 108,51110 | 831,08252  | 175,68888 | 12,36447 |
| 2013 Valensole | VP13 | Roumoules | 6  | JO  | NA | forte        | 166,4258242 | 52,90909  | 6,75595 | 103,98749 | 1192,14609 | 154,65896 | 10,54304 |
| 2013 Valensole | VP13 | Roumoules | 6  | JO  | NA | forte        | 149,202381  | NA        | 7,17067 | 92,66799  | 764,07368  | 176,41981 | 17,89057 |
| 2013 Valensole | VP13 | Roumoules | 6  | JO  | NA | forte        | 165,4656593 | NA        | 5,95364 | 103,74143 | 1006,96176 | 155,05821 | 16,49130 |
| 2013 Valensole | VP13 | Roumoules | 6  | JO  | NA | forte        | 135,6858974 | NA        | 6,37603 | NA        | NA         | 173,44789 | 8,74657  |
| 2013 Valensole | VP13 | Roumoules | 5  | JO  | NA | forte        | 124,8777473 | 100,24646 | 6,46268 | 108,92007 | 969,59738  | 175,21063 | 8,74176  |
| 2013 Valensole | VP13 | Roumoules | 5  | JO  | NA | forte        | 128,5082418 | 66,42828  | 6,94780 | 109,46741 | 1499,08848 | 182,42732 | 10,16987 |
| 2013 Valensole | VP13 | Roumoules | 5  | JO  | NA | forte        | 135,4505495 | 49,61212  | 5,89526 | 110,03466 | 916,92368  | 158,50027 | 9,76236  |
| 2013 Valensole | VP13 | Roumoules | 5  | JO  | NA | forte        | 144,7628205 | 87,88485  | 7,12157 | 71,38290  | 1000,19784 | 163,54743 | 7,08288  |
| 2013 Valensole | VP13 | Roumoules | 5  | JO  | NA | forte        | 36,55311355 | 69,73939  | 4,04945 | 94,98069  | 1301,09448 | 176,49437 | 8,79625  |
| 2013 Valensole | VP13 | Roumoules | 5  | JO  | NA | forte        | 113,3818681 | 87,17576  | 6,74519 | 90,34897  | 1218,27032 | 176,70393 | 12,52930 |
| 2013 Valensole | VP13 | Roumoules | 5  | JO  | NA | forte        | 101,8846154 | 77,21616  | 5,73008 | 100,81856 | 1185,04528 | 145,07295 | 10,01190 |
| 2013 Valensole | VP13 | Roumoules | 5  | JO  | NA | forte        | 70,11172161 | 64,22626  | 5,35646 | 79,96065  | 1118,42623 | 164,99448 | 10,54808 |
| 2013 Valensole | VP13 | Roumoules | 5  | JO  | NA | forte        | 112,3598901 | 58,83636  | 5,71085 | NA        | 792,90531  | 164,56127 | 8,41667  |
| 2013 Valensole | VP13 | Roumoules | 5  | JO  | NA | forte        | 64,38003663 | NA        | 5,84375 | NA        | 1331,73795 | 170,73965 | 8,13736  |
| 2013 Drome     | DB13 | Grignan   | 7  | J30 |    | 19,02 faible | 103,575092  | 61,00440  | NA      | 97,53846  | 998,76400  | 134,42857 | 12,04533 |
| 2013 Drome     | DB13 | Grignan   | 7  | J30 |    | 19,02 faible | 111,124542  | 73,40366  | NA      | 127,29304 | 781,55619  | 112,79487 | 8,47711  |
| 2013 Drome     | DB13 | Grignan   | 7  | J30 |    | 19,02 faible | 93,572344   | NA        | 4,64606 | 103,18681 | 1111,74146 | 126,50183 | 9,70788  |
| 2013 Drome     | DB13 | Grignan   | 7  | J30 |    | 19,02 faible | 82,796704   | 45,85641  | 4,32761 | 95,77656  | 931,43852  | 132,52930 | 6,76557  |
| 2013 Drome     | DB13 | Grignan   | 7  | J30 |    | 19,02 faible | 77,605312   | 50,34139  | 5,56521 | 104,81502 | 855,70037  | 132,79487 | 6,05998  |
| 2013 Drome     | DB13 | Grignan   | 7  | J30 |    | 19,02 faible | 98,23077    | 81,99853  | 5,10817 | 114,19963 | 1265,62381 | 141,02564 | 10,75366 |
| 2013 Drome     | DB13 | Grignan   | 7  | J30 |    | 19,02 faible | 102,301282  | 84,88571  | 5,16655 | 112,98535 | 1435,35188 | 133,31136 | 11,45192 |
| 2013 Drome     | DB13 | Grignan   | 7  | J30 |    | 19,02 faible | 77,589744   | 58,21245  | 5,69059 | 113,04396 | 1101,01916 | 125,30037 | 8,76282  |
| 2013 Drome     | DB13 | Grignan   | 7  | J30 |    | 19,02 faible | 89,166666   | 38,84396  | NA      | 128,77106 | 1003,48611 | 145,17582 | 8,25412  |
| 2013 Drome     | DB13 | Grignan   | 7  | J30 |    | 19,02 faible | 73,136446   | 55,88864  | NA      | 119,43956 | 967,50786  | 137,56044 | 10,49405 |
| 2013 Drome     | DB13 | Grignan   | 9  | J30 |    | 19,36 faible | 78,85348    | 53,24835  | NA      | 111,31502 | 972,23346  | 145,19780 | 9,04579  |
| 2013 Drome     | DB13 | Grignan   | 9  | J30 |    | 19,36 faible | 79,26099    | 57,39048  | 7,30426 | 120,29304 | 967,90710  | 138,05128 | 7,79487  |
| 2013 Drome     | DB13 | Grignan   | 9  | J30 |    | 19,36 faible | 68,862638   | 63,46960  | NA      | 126,83150 | 1122,67493 | 143,82784 | 6,70398  |
| 2013 Drome     | DB13 | Grignan   | 9  | J30 |    | 19,36 faible | 57,618132   | 86,95385  | 6,06731 | 113,53114 | 850,50307  | 139,89377 | 8,38919  |



|            |      |         |        |              |            |           |         |           |            |           |          |
|------------|------|---------|--------|--------------|------------|-----------|---------|-----------|------------|-----------|----------|
| 2013 Drome | DB13 | Grignan | 9 J30  | 19,36 faible | 55,479854  | 84,53187  | NA      | 110,24359 | 1325,56391 | 142,34432 | 10,03778 |
| 2013 Drome | DB13 | Grignan | 9 J30  | 19,36 faible | 55,97619   | 79,83443  | 6,76603 | 119,97070 | 1155,94337 | 144,60073 | 8,71062  |
| 2013 Drome | DB13 | Grignan | 9 J30  | 19,36 faible | 46,442308  | 64,46374  | 5,82967 | 118,46520 | 1172,18721 | 150,69963 | 7,51099  |
| 2013 Drome | DB13 | Grignan | 9 J30  | 19,36 faible | 57,897436  | 74,99341  | NA      | 116,24542 | 1479,50441 | 147,93773 | 5,05311  |
| 2013 Drome | DB13 | Grignan | 9 J30  | 19,36 faible | 116,319598 | 78,41978  | 8,23283 | 145,87912 | 874,15899  | 141,88645 | 7,45055  |
| 2013 Drome | DB13 | Grignan | 9 J30  | 19,36 faible | 111,356228 | 64,30037  | 7,26408 | 133,56044 | 1188,78628 | 150,64469 | 7,58173  |
| 2013 Drome | DB13 | Grignan | 2 J30  | 24,14 faible | 72,70055   | 24,50989  | 5,75343 | 110,51648 | 1411,95356 | 147,26740 | 5,23283  |
| 2013 Drome | DB13 | Grignan | 2 J30  | 24,14 faible | 76,826008  | 48,75385  | 6,43849 | 111,49817 | 1844,83124 | 146,61172 | 9,80998  |
| 2013 Drome | DB13 | Grignan | 2 J30  | 24,14 faible | 76,35989   | 51,60220  | 5,60611 | 109,26740 | 1662,36142 | 135,25641 | 10,47711 |
| 2013 Drome | DB13 | Grignan | 2 J30  | 24,14 faible | 71,3663    | 60,18681  | NA      | 107,56777 | 1632,85561 | 143,69597 | 5,97608  |
| 2013 Drome | DB13 | Grignan | 2 J30  | 24,14 faible | 78,988096  | 43,73480  | 6,88713 | 114,01099 | 1763,11158 | 162,47253 | 4,65934  |
| 2013 Drome | DB13 | Grignan | 2 J30  | 24,14 faible | 103,317766 | 37,47106  | 7,56937 | 125,67399 | 1677,14170 | 149,65934 | 5,92079  |
| 2013 Drome | DB13 | Grignan | 2 J30  | 24,14 faible | 77,826008  | 94,42784  | 6,47215 | 120,05495 | 1659,45354 | 132,63370 | 7,76738  |
| 2013 Drome | DB13 | Grignan | 2 J30  | 24,14 faible | 87,204212  | 72,79853  | 6,03915 | 110,15751 | 1933,56607 | 143,38095 | 7,33104  |
| 2013 Drome | DB13 | Grignan | 2 J30  | 24,14 faible | 67,112638  | 47,02198  | NA      | 142,15385 | 1380,92620 | 140,21245 | NA       |
| 2013 Drome | DB13 | Grignan | 2 J30  | 24,14 faible | 82,016484  | 70,23736  | 6,17823 | 114,03663 | 2378,34480 | 181,62637 | 8,36722  |
| 2013 Drome | DB13 | Grignan | 8 J30  | 24,38 faible | 93,71978   | 76,60440  | NA      | 98,78022  | 783,15762  | 120,43590 | 9,64332  |
| 2013 Drome | DB13 | Grignan | 8 J30  | 24,38 faible | 99,321428  | 119,64689 | 4,95673 | 96,30769  | 763,76255  | 114,18681 | 8,24908  |
| 2013 Drome | DB13 | Grignan | 8 J30  | 24,38 faible | 77,968864  | 93,49304  | 5,18544 | 92,20879  | 1213,37190 | 109,22344 | 9,63370  |
| 2013 Drome | DB13 | Grignan | 8 J30  | 24,38 faible | 79,956044  | 97,17143  | NA      | 87,87179  | 1008,31606 | 115,93773 | 8,79121  |
| 2013 Drome | DB13 | Grignan | 8 J30  | 24,38 faible | 80,516484  | 104,12454 | 4,89595 | 99,20513  | 1210,59205 | 130,28938 | NA       |
| 2013 Drome | DB13 | Grignan | 8 J30  | 24,38 faible | 77,265568  | 108,96557 | 4,85256 | 89,41392  | 1085,28531 | 112,93223 | 5,55044  |
| 2013 Drome | DB13 | Grignan | 8 J30  | 24,38 faible | 72,556776  | 102,50549 | 5,36813 | 84,53846  | 1095,99012 | 125,97802 | 6,39698  |
| 2013 Drome | DB13 | Grignan | 8 J30  | 24,38 faible | 85,40751   | 92,22271  | 5,14801 | 98,91941  | 1650,82856 | 124,01465 | 6,98581  |
| 2013 Drome | DB13 | Grignan | 8 J30  | 24,38 faible | 68,248168  | 119,89451 | 4,54190 | 97,38095  | 1218,17007 | 121,27839 | 7,28084  |
| 2013 Drome | DB13 | Grignan | 8 J30  | 24,38 faible | 89,806776  | 84,83810  | 5,64904 | 105,42125 | 1345,96689 | 133,51465 | 12,09478 |
| 2013 Drome | DB13 | Grignan | 16 J30 | 25,11 faible | 75,375458  | 62,18462  | 6,36470 | 97,08059  | 1529,14088 | 122,86630 | 7,43178  |
| 2013 Drome | DB13 | Grignan | 16 J30 | 25,11 faible | 50,706044  | 49,12527  | 5,40315 | 93,07692  | 1545,06941 | 139,48718 | 8,66896  |
| 2013 Drome | DB13 | Grignan | 16 J30 | 25,11 faible | 55,87271   | 59,52088  | 6,03022 | 102,21978 | 1780,22301 | 141,31868 | NA       |
| 2013 Drome | DB13 | Grignan | 16 J30 | 25,11 faible | 51,089744  | 63,77582  | 5,97115 | 98,43223  | 1610,77409 | 132,14652 | 7,09890  |
| 2013 Drome | DB13 | Grignan | 16 J30 | 25,11 faible | 57,931318  | 71,17070  | 5,87850 | 92,37363  | 1432,54842 | 106,10256 | 6,13599  |
| 2013 Drome | DB13 | Grignan | 16 J30 | 25,11 faible | 82,696886  | 74,18901  | 7,47829 | 101,13919 | 2009,63178 | 128,95238 | 5,99519  |
| 2013 Drome | DB13 | Grignan | 16 J30 | 25,11 faible | 55,455128  | 56,85275  | 5,80769 | 102,62271 | 1556,32405 | 119,24176 | 4,54762  |
| 2013 Drome | DB13 | Grignan | 16 J30 | 25,11 faible | 88,499084  | 58,57582  | 6,84924 | 116,90842 | 1827,09693 | 128,65568 | 4,91552  |
| 2013 Drome | DB13 | Grignan | 16 J30 | 25,11 faible | 134,844322 | 52,53480  | 8,52976 | 125,69597 | 2097,51929 | 136,62271 | NA       |
| 2013 Drome | DB13 | Grignan | 16 J30 | 25,11 faible | 122,736264 | 56,00220  | 8,58585 | 140,38828 | 1887,79506 | 132,29304 | 4,45604  |
| 2013 Drome | DB13 | Grignan | 17 J30 | 37,74 forte  | 135,984432 | 91,45934  | NA      | 122,35165 | 1589,50991 | 125,00733 | 7,43681  |
| 2013 Drome | DB13 | Grignan | 17 J30 | 37,74 forte  | 140,53022  | 101,59267 | 8,83894 | 139,91575 | 1446,97296 | 121,68864 | 12,23672 |
| 2013 Drome | DB13 | Grignan | 17 J30 | 37,74 forte  | 145,711538 | 115,57582 | 9,14881 | 129,01099 | 1538,66843 | 109,97436 | 10,10943 |
| 2013 Drome | DB13 | Grignan | 17 J30 | 37,74 forte  | 138,283882 | 72,10989  | 9,04464 | 140,12088 | 2157,97445 | 118,46886 | 8,44048  |
| 2013 Drome | DB13 | Grignan | 17 J30 | 37,74 forte  | 134,270146 | 123,45934 | 9,19093 | 137,75092 | 1310,00995 | 121,81685 | 7,51969  |

|            |      |         |        |             |            |           |         |           |            |           |          |
|------------|------|---------|--------|-------------|------------|-----------|---------|-----------|------------|-----------|----------|
| 2013 Drome | DB13 | Grignan | 17 J30 | 37,74 forte | 122,341576 | 92,84176  | 8,89973 | 138,54945 | 1236,91497 | 109,44689 | 7,28755  |
| 2013 Drome | DB13 | Grignan | 17 J30 | 37,74 forte | 137,364468 | 104,89524 | 9,29876 | 132,93040 | 1392,44814 | 117,20879 | 9,95948  |
| 2013 Drome | DB13 | Grignan | 17 J30 | 37,74 forte | 128,485348 | 124,17875 | 8,51122 | 130,85348 | 1427,78517 | 123,54579 | 11,25549 |
| 2013 Drome | DB13 | Grignan | 17 J30 | 37,74 forte | 125,467032 | 104,60073 | 9,07990 | 134,26374 | 1562,87975 | 113,74359 | 10,18496 |
| 2013 Drome | DB13 | Grignan | 17 J30 | 37,74 forte | 140,59066  | 90,44689  | 9,41003 | 140,08059 | 1628,46851 | 109,00733 | 7,92651  |
| 2013 Drome | DB13 | Grignan | 11 J30 | 38,16 forte | 63,12729   | 85,04615  | 4,81031 | 83,55678  | 1392,84020 | 115,44322 | 7,60348  |
| 2013 Drome | DB13 | Grignan | 11 J30 | 38,16 forte | 39,182234  | 90,61978  | 5,30861 | 90,33700  | 1350,31571 | 131,16850 | 8,46563  |
| 2013 Drome | DB13 | Grignan | 11 J30 | 38,16 forte | 65,649268  | 81,61026  | 6,00252 | 86,10989  | 1309,50414 | 122,55311 | 12,51511 |
| 2013 Drome | DB13 | Grignan | 11 J30 | 38,16 forte | 77,677656  | 104,90403 | 5,95078 | 84,69597  | 1174,99430 | 129,38462 | 12,63736 |
| 2013 Drome | DB13 | Grignan | 11 J30 | 38,16 forte | 66,108058  | 76,31941  | 5,73603 | 93,15385  | 1211,80923 | 95,07326  | 4,77152  |
| 2013 Drome | DB13 | Grignan | 11 J30 | 38,16 forte | 72,779304  | 87,63370  | 6,01648 | 96,66300  | 1664,86269 | 120,29670 | NA       |
| 2013 Drome | DB13 | Grignan | 11 J30 | 38,16 forte | 64,457876  | 94,49231  | 5,19757 | 88,16484  | 1205,47937 | 117,47619 | NA       |
| 2013 Drome | DB13 | Grignan | 11 J30 | 38,16 forte | 82,62912   | 94,59194  | 6,48626 | 101,78022 | 1415,33861 | 120,05861 | 7,44432  |
| 2013 Drome | DB13 | Grignan | 11 J30 | 38,16 forte | 67,467948  | 81,47692  | 5,29705 | 96,61172  | 1306,74965 | 130,93040 | 6,61630  |
| 2013 Drome | DB13 | Grignan | 11 J30 | 38,16 forte | 83,317766  | 93,61026  | 6,23317 | 103,60806 | 1336,95865 | 130,97070 | 7,54602  |
| 2013 Drome | DB13 | Grignan | 18 J30 | 41,34 forte | 98,061356  | 43,50916  | 5,59364 | 83,60806  | 539,46092  | 106,90476 | 8,61470  |
| 2013 Drome | DB13 | Grignan | 18 J30 | 41,34 forte | 98,7674    | 39,83956  | 6,40522 | NA        | 819,41249  | 118,80220 | 8,82234  |
| 2013 Drome | DB13 | Grignan | 18 J30 | 41,34 forte | 100,59707  | 48,60440  | 5,22100 | 85,00549  | 497,04115  | 124,61172 | 8,31777  |
| 2013 Drome | DB13 | Grignan | 18 J30 | 41,34 forte | 104,635532 | 35,26593  | 7,21051 | 115,91575 | 400,46009  | 113,58974 | 8,70124  |
| 2013 Drome | DB13 | Grignan | 18 J30 | 41,34 forte | 100,508242 | 42,94652  | 6,19002 | 90,71795  | 753,93372  | 109,87179 | 7,70147  |
| 2013 Drome | DB13 | Grignan | 18 J30 | 41,34 forte | 113,898352 | 42,89451  | 6,76236 | 95,43956  | 873,05198  | 116,76923 | 8,12225  |
| 2013 Drome | DB13 | Grignan | 18 J30 | 41,34 forte | 114,126374 | 62,18901  | 6,20627 | 98,72527  | 616,44484  | 133,14286 | 6,99245  |
| 2013 Drome | DB13 | Grignan | 18 J30 | 41,34 forte | 125,532968 | 41,73919  | 8,39217 | 126,99634 | 993,05474  | 116,89744 | 7,73031  |
| 2013 Drome | DB13 | Grignan | 18 J30 | 41,34 forte | 132        | 47,69670  | 8,60737 | 121,60806 | 918,17938  | 115,07326 | 7,09982  |
| 2013 Drome | DB13 | Grignan | 18 J30 | 41,34 forte | 115,501832 | 37,39341  | 7,11779 | 124,05495 | 796,44954  | 125,61538 | 6,81364  |
| 2013 Drome | DB13 | Grignan | 13 J30 | 41,92 forte | 126,459706 | 68,59048  | 7,56593 | 119,15385 | 1014,53922 | 120,78755 | 8,44963  |
| 2013 Drome | DB13 | Grignan | 13 J30 | 41,92 forte | 114,898352 | 42,61978  | 7,37225 | 114,97802 | 1206,89268 | 123,40659 | 7,24038  |
| 2013 Drome | DB13 | Grignan | 13 J30 | 41,92 forte | 109,171246 | 68,47912  | 7,57486 | 111,06044 | 1052,86190 | 114,42125 | 6,56799  |
| 2013 Drome | DB13 | Grignan | 13 J30 | 41,92 forte | 117,473444 | 43,24176  | 6,48489 | 133,08791 | 906,73512  | 114,25275 | 7,56525  |
| 2013 Drome | DB13 | Grignan | 13 J30 | 41,92 forte | 126,648352 | 53,55824  | 8,22962 | 126,28571 | 1200,51955 | 130,87546 | 9,46886  |
| 2013 Drome | DB13 | Grignan | 13 J30 | 41,92 forte | 106,035714 | 84,00586  | 7,29396 | 124,55311 | 1218,62460 | 132,20147 | 6,67674  |
| 2013 Drome | DB13 | Grignan | 13 J30 | 41,92 forte | 115,67033  | 76,51868  | 6,88874 | 103,37363 | 1193,91981 | 97,56777  | 9,28068  |
| 2013 Drome | DB13 | Grignan | 13 J30 | 41,92 forte | 117,568682 | 56,93846  | 8,10531 | 124,42125 | 794,79126  | 109,70696 | 8,18544  |
| 2013 Drome | DB13 | Grignan | 13 J30 | 41,92 forte | 111,275642 | 67,29451  | 7,33082 | 114,12088 | 1048,24373 | 116,69231 | 8,25412  |
| 2013 Drome | DB13 | Grignan | 13 J30 | 41,92 forte | 121,631868 | 79,91502  | 7,09718 | 117,50183 | 1010,58502 | 126,83516 | 5,85623  |
| 2013 Drome | DB13 | Grignan | 14 J30 | 44,4 forte  | 70,37912   | 86,71648  | NA      | 72,08791  | 1240,82713 | 96,83516  | NA       |
| 2013 Drome | DB13 | Grignan | 14 J30 | 44,4 forte  | 88,277472  | 77,32747  | 7,27658 | 84,12088  | 915,09104  | 90,77106  | NA       |
| 2013 Drome | DB13 | Grignan | 14 J30 | 44,4 forte  | 107,817766 | 66,88352  | 6,38965 | 97,87546  | 908,87971  | 94,56410  | 8,13942  |
| 2013 Drome | DB13 | Grignan | 14 J30 | 44,4 forte  | 95,318682  | 75,93846  | 6,09936 | 86,88645  | 1166,93079 | 102,74725 | 6,66807  |
| 2013 Drome | DB13 | Grignan | 14 J30 | 44,4 forte  | 88,871794  | 76,86447  | 5,25314 | 85,42857  | 625,71713  | 103,34249 | 10,79625 |
| 2013 Drome | DB13 | Grignan | 14 J30 | 44,4 forte  | 83,89011   | 86,05861  | 4,16415 | 77,24542  | 806,02268  | 97,47985  | 6,89103  |

|            |      |           |        |              |            |           |         |           |            |           |          |
|------------|------|-----------|--------|--------------|------------|-----------|---------|-----------|------------|-----------|----------|
| 2013 Drome | DB13 | Grignan   | 14 J30 | 44,4 forte   | 115,298534 | 75,53260  | 5,68132 | 83,36264  | 1287,37922 | 100,04029 | 8,14766  |
| 2013 Drome | DB13 | Grignan   | 14 J30 | 44,4 forte   | 78,268316  | 57,20659  | 4,84821 | 82,13919  | 1041,24231 | 94,94872  | NA       |
| 2013 Drome | DB13 | Grignan   | 14 J30 | 44,4 forte   | 74,528388  | 68,35018  | 4,22905 | 74,69780  | 1190,71644 | 95,66667  | 8,90888  |
| 2013 Drome | DB13 | Grignan   | 14 J30 | 44,4 forte   | 99,191392  | 71,40513  | 6,40419 | 95,18315  | 915,52611  | 81,45055  | 7,06410  |
| 2013 Drome | DL13 | Taulignan | 13 J30 | 11,14 faible | 103,535714 | 155,16044 | 6,61813 | 106,78022 | 1351,37346 | 124,89377 | 15,12546 |
| 2013 Drome | DL13 | Taulignan | 13 J30 | 11,14 faible | 96,41575   | 146,15971 | 5,54831 | 90,95604  | 1420,29382 | 119,06593 | 10,77141 |
| 2013 Drome | DL13 | Taulignan | 13 J30 | 11,14 faible | 91,491758  | 163,29963 | 5,31433 | 86,11722  | 1535,14414 | 126,29670 | 11,02953 |
| 2013 Drome | DL13 | Taulignan | 13 J30 | 11,14 faible | 91,076008  | 163,27179 | 5,31078 | 90,35531  | 1437,43846 | 120,58608 | 12,98581 |
| 2013 Drome | DL13 | Taulignan | 13 J30 | 11,14 faible | 110,685898 | 163,57509 | 6,68887 | 98,68681  | 1460,63262 | 118,94505 | 11,31593 |
| 2013 Drome | DL13 | Taulignan | 13 J30 | 11,14 faible | 106,021062 | 143,69524 | 4,45227 | 89,10989  | 1505,90576 | 125,56044 | 15,64652 |
| 2013 Drome | DL13 | Taulignan | 13 J30 | 11,14 faible | 93,357142  | 166,13480 | 5,98437 | 97,43590  | 1645,49016 | 110,52747 | 11,48489 |
| 2013 Drome | DL13 | Taulignan | 13 J30 | 11,14 faible | 111,322344 | 164,98462 | 5,18979 | 91,23443  | 1244,50835 | 118,14286 | 15,35440 |
| 2013 Drome | DL13 | Taulignan | 13 J30 | 11,14 faible | 119,638278 | 140,90989 | 8,95169 | 127,05861 | 1483,04376 | 118,08425 | 15,36905 |
| 2013 Drome | DL13 | Taulignan | 13 J30 | 11,14 faible | 126,596154 | 121,89011 | 8,15087 | 122,76557 | 1705,89422 | 127,12088 | 14,11996 |
| 2013 Drome | DL13 | Taulignan | 17 J30 | 20,34 faible | 110,824176 | 81,73480  | NA      | 134,54212 | 1063,91209 | 146,68864 | 9,82555  |
| 2013 Drome | DL13 | Taulignan | 17 J30 | 20,34 faible | 114,114468 | 63,45934  | 8,85211 | 123,92674 | 589,21605  | 119,60806 | 8,43407  |
| 2013 Drome | DL13 | Taulignan | 17 J30 | 20,34 faible | 114,355312 | 82,66667  | 8,89400 | 133,53114 | 687,74333  | 125,26740 | 9,46429  |
| 2013 Drome | DL13 | Taulignan | 17 J30 | 20,34 faible | 119,091576 | 88,80440  | 7,21600 | 118,28205 | 818,73660  | 141,07692 | 7,40728  |
| 2013 Drome | DL13 | Taulignan | 17 J30 | 20,34 faible | 100,563186 | 89,25275  | 7,47459 | 125,57143 | 626,82950  | 140,54029 | 9,46154  |
| 2013 Drome | DL13 | Taulignan | 17 J30 | 20,34 faible | 108,005494 | 79,14579  | 5,06163 | 129,84615 | 1148,57720 | 130,08059 | 8,11401  |
| 2013 Drome | DL13 | Taulignan | 17 J30 | 20,34 faible | 108,79304  | 72,32308  | 8,86355 | 131,06593 | 1355,69499 | 132,64835 | NA       |
| 2013 Drome | DL13 | Taulignan | 17 J30 | 20,34 faible | 124,020146 | 62,61758  | 7,72184 | 136,27106 | 1439,79039 | 135,91209 | 6,20810  |
| 2013 Drome | DL13 | Taulignan | 17 J30 | 20,34 faible | 136,221612 | 70,15531  | 8,35001 | 134,34066 | 1573,45975 | 133,32967 | 6,02706  |
| 2013 Drome | DL13 | Taulignan | 17 J30 | 20,34 faible | 126,70696  | NA        | 9,29556 | 138,89011 | 463,47642  | 127,78388 | 8,05403  |
| 2013 Drome | DL13 | Taulignan | 16 J30 | 22,46 faible | 117,167582 | 67,69670  | 9,26213 | 142,32967 | 1620,80068 | 122,95604 | 9,11905  |
| 2013 Drome | DL13 | Taulignan | 16 J30 | 22,46 faible | 87,26923   | 88,16557  | 7,29382 | 106,06227 | 1256,15782 | 109,07326 | 7,42582  |
| 2013 Drome | DL13 | Taulignan | 16 J30 | 22,46 faible | 113,071428 | 98,86007  | 7,62809 | 122,02930 | 1392,18496 | 137,52381 | 10,22024 |
| 2013 Drome | DL13 | Taulignan | 16 J30 | 22,46 faible | 119,64011  | 69,04469  | 7,05838 | 123,36996 | 1465,16199 | 144,42125 | 7,29899  |
| 2013 Drome | DL13 | Taulignan | 16 J30 | 22,46 faible | 112,403846 | 83,71209  | 6,47894 | 105,35165 | 1425,55085 | 152,41026 | 10,54533 |
| 2013 Drome | DL13 | Taulignan | 16 J30 | 22,46 faible | 113,285714 | 92,57363  | 9,23798 | 112,44322 | 1340,03841 | 132,98535 | 12,21909 |
| 2013 Drome | DL13 | Taulignan | 16 J30 | 22,46 faible | 117,332418 | 78,94066  | 8,23283 | 136,34799 | 1426,99745 | 133,70330 | 8,55769  |
| 2013 Drome | DL13 | Taulignan | 16 J30 | 22,46 faible | 109,681318 | 67,56337  | 8,12706 | 134,55678 | 1525,83846 | 146,87546 | NA       |
| 2013 Drome | DL13 | Taulignan | 16 J30 | 22,46 faible | 107,923076 | 78,65201  | 7,46635 | 115,11722 | 1371,38801 | 147,28938 | 7,03503  |
| 2013 Drome | DL13 | Taulignan | 16 J30 | 22,46 faible | 133,862638 | 94,20220  | 8,80185 | 136,55678 | 1031,31964 | 148,28205 | 6,84346  |
| 2013 Drome | DL13 | Taulignan | 9 J30  | 22,8 faible  | 207,607142 | 124,19927 | 7,66964 | 131,00733 | 1475,08143 | 138,43407 | 8,68727  |
| 2013 Drome | DL13 | Taulignan | 9 J30  | 22,8 faible  | 153,321428 | 111,80806 | 7,78594 | 127,12271 | 1369,41296 | 155,02198 | 8,31868  |
| 2013 Drome | DL13 | Taulignan | 9 J30  | 22,8 faible  | 172,81044  | 90,49231  | 7,21189 | 118,32601 | 1210,18039 | 158,96703 | NA       |
| 2013 Drome | DL13 | Taulignan | 9 J30  | 22,8 faible  | 154,442308 | 115,27766 | 8,54121 | 138,52015 | 1375,87735 | 152,00000 | 6,49657  |
| 2013 Drome | DL13 | Taulignan | 9 J30  | 22,8 faible  | 194,046704 | 130,99634 | 8,17628 | 128,70696 | 1177,57665 | 132,74359 | 8,02514  |
| 2013 Drome | DL13 | Taulignan | 9 J30  | 22,8 faible  | 191,464286 | 92,08205  | 7,00481 | 129,69963 | 1722,67672 | 149,16117 | 8,69643  |
| 2013 Drome | DL13 | Taulignan | 9 J30  | 22,8 faible  | 174,87912  | 127,39487 | 7,94299 | 139,08425 | 1381,75187 | 124,16117 | 7,40591  |

|            |      |           |        |              |            |           |          |           |            |           |          |
|------------|------|-----------|--------|--------------|------------|-----------|----------|-----------|------------|-----------|----------|
| 2013 Drome | DL13 | Taulignan | 9 J30  | 22,8 faible  | 161,516484 | 133,90916 | 7,71749  | 131,05861 | 1185,32192 | 140,20879 | 8,67079  |
| 2013 Drome | DL13 | Taulignan | 9 J30  | 22,8 faible  | 190,574176 | 128,86374 | 8,30861  | 132,67399 | 945,83418  | 132,13919 | 7,60165  |
| 2013 Drome | DL13 | Taulignan | 9 J30  | 22,8 faible  | 193,67033  | 97,38168  | 9,01351  | 135,63004 | 1289,87556 | 149,38462 | 7,28297  |
| 2013 Drome | DL13 | Taulignan | 6 J30  | 23,12 faible | 151,115384 | 76,71648  | 8,98924  | 138,26374 | 1081,08096 | 141,20147 | 8,17549  |
| 2013 Drome | DL13 | Taulignan | 6 J30  | 23,12 faible | 157,31044  | 70,79121  | 9,51694  | 153,62271 | 403,02513  | 154,26374 | 8,64469  |
| 2013 Drome | DL13 | Taulignan | 6 J30  | 23,12 faible | 168,56044  | 82,77949  | 7,82418  | 128,20879 | 1033,55468 | 157,85714 | NA       |
| 2013 Drome | DL13 | Taulignan | 6 J30  | 23,12 faible | 151,013736 | NA        | 9,05678  | 150,64835 | 943,78206  | 154,94139 | 7,41621  |
| 2013 Drome | DL13 | Taulignan | 6 J30  | 23,12 faible | 118,313186 | 89,62784  | NA       | 139,97070 | 888,36326  | 155,65934 | NA       |
| 2013 Drome | DL13 | Taulignan | 6 J30  | 23,12 faible | 163,464286 | 71,13407  | 8,21566  | 131,15018 | 1022,31839 | 149,72161 | 8,75824  |
| 2013 Drome | DL13 | Taulignan | 6 J30  | 23,12 faible | 128,01099  | 87,23297  | 9,39515  | 141,82784 | 1142,23592 | 166,96337 | 7,27106  |
| 2013 Drome | DL13 | Taulignan | 6 J30  | 23,12 faible | 129,673076 | 82,46447  | 9,00160  | 140,47985 | 687,87007  | 155,77289 | 7,92170  |
| 2013 Drome | DL13 | Taulignan | 6 J30  | 23,12 faible | 125,398352 | 77,41978  | 8,68681  | 135,35897 | 1169,99874 | 150,94872 | 6,04579  |
| 2013 Drome | DL13 | Taulignan | 6 J30  | 23,12 faible | 168,478022 | 85,10989  | 9,46978  | 142,55678 | 766,18151  | 151,83883 | 8,45742  |
| 2013 Drome | DL13 | Taulignan | 4 J30  | 37,06 forte  | 98,703296  | 41,11941  | 5,83001  | 78,71429  | 855,07756  | 132,11538 | 7,31090  |
| 2013 Drome | DL13 | Taulignan | 4 J30  | 37,06 forte  | 106,287546 | 44,44396  | 7,56319  | 100,69963 | 804,21324  | 132,54945 | 10,26493 |
| 2013 Drome | DL13 | Taulignan | 4 J30  | 37,06 forte  | 111,008242 | 34,77509  | 7,74908  | 117,32601 | 1079,29202 | 147,30769 | 8,88530  |
| 2013 Drome | DL13 | Taulignan | 4 J30  | 37,06 forte  | 106,790294 | 57,86960  | 6,10417  | 105,01832 | 1176,88448 | 130,19414 | 8,55754  |
| 2013 Drome | DL13 | Taulignan | 4 J30  | 37,06 forte  | 111,423076 | 43,81319  | 6,38359  | 104,90842 | 1043,04484 | NA        | 10,11172 |
| 2013 Drome | DL13 | Taulignan | 4 J30  | 37,06 forte  | 118,397436 | 42,54066  | 6,91712  | 98,48352  | 597,85023  | 134,52015 | 11,64835 |
| 2013 Drome | DL13 | Taulignan | 4 J30  | 37,06 forte  | 117,966118 | 78,89817  | 5,90316  | 113,35165 | 601,55504  | 126,90110 | 8,32898  |
| 2013 Drome | DL13 | Taulignan | 4 J30  | 37,06 forte  | 136,224358 | 65,16190  | 6,63874  | 112,95971 | 961,98608  | 139,92857 | 8,85508  |
| 2013 Drome | DL13 | Taulignan | 4 J30  | 37,06 forte  | 109,67674  | 55,52308  | 5,44093  | 89,54579  | 907,75893  | 131,13187 | 8,71294  |
| 2013 Drome | DL13 | Taulignan | 4 J30  | 37,06 forte  | 114,891026 | NA        | 5,80266  | 93,64103  | 1234,23875 | 132,89011 | 10,89698 |
| 2013 Drome | DL13 | Taulignan | 20 J30 | 37,22 forte  | 115,094322 | 68,87912  | 6,97630  | 107,85714 | 656,12817  | 139,46154 | 9,43544  |
| 2013 Drome | DL13 | Taulignan | 20 J30 | 37,22 forte  | 107,401098 | 62,28571  | 6,92891  | 104,76190 | 828,48150  | 142,95971 | 7,22115  |
| 2013 Drome | DL13 | Taulignan | 20 J30 | 37,22 forte  | 118,881868 | 56,89451  | 7,83516  | 105,65568 | 563,41716  | 134,98535 | 7,56914  |
| 2013 Drome | DL13 | Taulignan | 20 J30 | 37,22 forte  | 110,54762  | 49,20440  | 8,36447  | 126,65385 | 1019,00871 | 138,92857 | 8,55357  |
| 2013 Drome | DL13 | Taulignan | 20 J30 | 37,22 forte  | 124,322344 | 67,39780  | 9,26854  | NA        | 832,87847  | 126,11355 | 8,87225  |
| 2013 Drome | DL13 | Taulignan | 20 J30 | 37,22 forte  | 120,851648 | 79,12234  | 7,87157  | 133,53480 | 1047,73306 | 128,14286 | 5,29991  |
| 2013 Drome | DL13 | Taulignan | 20 J30 | 37,22 forte  | 124,253664 | 85,16044  | 9,45673  | 134,09890 | 786,62592  | 154,01099 | 6,56822  |
| 2013 Drome | DL13 | Taulignan | 20 J30 | 37,22 forte  | 120,753664 | 90,29011  | 8,69177  | 122,36264 | 942,04782  | 151,55495 | 6,76374  |
| 2013 Drome | DL13 | Taulignan | 20 J30 | 37,22 forte  | 168,825092 | 59,73480  | 8,51820  | 125,22344 | 976,08513  | 143,61905 | 5,39835  |
| 2013 Drome | DL13 | Taulignan | 20 J30 | 37,22 forte  | 169,502748 | 44,34286  | 10,48329 | 161,07692 | 1087,20766 | 133,72527 | 5,96886  |
| 2013 Drome | DL13 | Taulignan | 14 J30 | 38,92 forte  | 187,891026 | 54,96264  | 8,01854  | 127,81685 | 601,44657  | 164,17582 | 9,11722  |
| 2013 Drome | DL13 | Taulignan | 14 J30 | 38,92 forte  | 187,54945  | 90,04396  | 8,85508  | 136,69963 | 884,93679  | 162,97436 | 7,62821  |
| 2013 Drome | DL13 | Taulignan | 14 J30 | 38,92 forte  | 200,779304 | 75,18242  | 7,49176  | 142,60440 | 1024,55856 | 133,97802 | 10,97527 |
| 2013 Drome | DL13 | Taulignan | 14 J30 | 38,92 forte  | 201,365384 | 89,74359  | 7,95582  | 132,19048 | 1369,45350 | 155,93773 | 7,56250  |
| 2013 Drome | DL13 | Taulignan | 14 J30 | 38,92 forte  | 179,706044 | 93,81099  | 8,12500  | 135,42857 | 748,23245  | 148,69597 | 9,08791  |
| 2013 Drome | DL13 | Taulignan | 14 J30 | 38,92 forte  | 168,096154 | 25,39121  | 8,71223  | 73,82418  | 793,72471  | 148,55678 | 6,91392  |
| 2013 Drome | DL13 | Taulignan | 14 J30 | 38,92 forte  | 151,2326   | 77,86960  | 8,41827  | 129,35531 | 1168,21228 | 140,97070 | 11,53342 |
| 2013 Drome | DL13 | Taulignan | 14 J30 | 38,92 forte  | 126,526556 | 73,81099  | 9,13897  | 140,29304 | 1098,81724 | 148,31868 | 8,93040  |

|                 |      |           |        |              |            |           |          |           |            |           |          |
|-----------------|------|-----------|--------|--------------|------------|-----------|----------|-----------|------------|-----------|----------|
| 2013 Drome      | DL13 | Taulignan | 14 J30 | 38,92 forte  | 128,054946 | 63,62637  | 9,69574  | 130,39194 | 1101,92199 | 152,54945 | 9,34272  |
| 2013 Drome      | DL13 | Taulignan | 14 J30 | 38,92 forte  | 177,577838 | 68,26667  | 11,14721 | 143,08059 | 864,82438  | 153,21978 | 7,61447  |
| 2013 Drome      | DL13 | Taulignan | 1 J30  | 41,28 forte  | 69,55586   | 75,30110  | 6,01099  | 93,38278  | 809,39489  | 122,50549 | 6,93338  |
| 2013 Drome      | DL13 | Taulignan | 1 J30  | 41,28 forte  | 61,974358  | 73,35971  | 6,30315  | 107,44872 | 1111,82501 | 116,72894 | 8,24267  |
| 2013 Drome      | DL13 | Taulignan | 1 J30  | 41,28 forte  | 88,374542  | 74,01319  | 5,83127  | 87,45971  | 973,77455  | 133,33700 | 7,55907  |
| 2013 Drome      | DL13 | Taulignan | 1 J30  | 41,28 forte  | 97,429488  | 62,89817  | 5,78365  | 107,22711 | 978,47859  | 126,46886 | 8,01236  |
| 2013 Drome      | DL13 | Taulignan | 1 J30  | 41,28 forte  | 106,10989  | NA        | 5,02835  | 94,93773  | 1171,89833 | 135,71429 | 7,67788  |
| 2013 Drome      | DL13 | Taulignan | 1 J30  | 41,28 forte  | 104,2674   | 65,57363  | 6,41621  | 106,84249 | 858,00261  | 122,96703 | 8,58791  |
| 2013 Drome      | DL13 | Taulignan | 1 J30  | 41,28 forte  | 92,876374  | 72,66227  | 4,43269  | 98,02930  | 1398,90239 | 123,13187 | 7,36813  |
| 2013 Drome      | DL13 | Taulignan | 1 J30  | 41,28 forte  | 87,577838  | 90,06154  | 5,49518  | 105,99817 | 1057,37136 | 124,97802 | 9,69963  |
| 2013 Drome      | DL13 | Taulignan | 1 J30  | 41,28 forte  | 73,26923   | 95,39780  | 4,44826  | 95,72894  | 1155,71530 | 129,88278 | 9,60897  |
| 2013 Drome      | DL13 | Taulignan | 1 J30  | 41,28 forte  | 81,141026  | 93,99707  | 4,79693  | 103,52747 | 1114,32986 | 120,27839 | 8,30815  |
| 2013 Drome      | DL13 | Taulignan | 10 J30 | 41,4 forte   | 162,043956 | 99,85934  | 6,66369  | 127,26190 | 1020,73431 | 151,50183 | NA       |
| 2013 Drome      | DL13 | Taulignan | 10 J30 | 41,4 forte   | 131,327838 | 86,12601  | 7,96886  | 130,45055 | 1505,31564 | 155,50549 | 10,26694 |
| 2013 Drome      | DL13 | Taulignan | 10 J30 | 41,4 forte   | 136,322344 | 76,83956  | 7,64045  | 143,71429 | 1149,49216 | 144,76923 | 8,85806  |
| 2013 Drome      | DL13 | Taulignan | 10 J30 | 41,4 forte   | 168,434066 | 85,18974  | 7,51305  | 121,66300 | 1058,06000 | 149,52015 | 8,06181  |
| 2013 Drome      | DL13 | Taulignan | 10 J30 | 41,4 forte   | 143,43315  | 102,71648 | 7,22471  | 108,30037 | 1341,92057 | 144,63736 | 9,53571  |
| 2013 Drome      | DL13 | Taulignan | 10 J30 | 41,4 forte   | 129,141942 | 88,31502  | 5,23695  | 97,54579  | 1339,12933 | 149,75458 | 8,21795  |
| 2013 Drome      | DL13 | Taulignan | 10 J30 | 41,4 forte   | 134,568682 | 99,53114  | 6,94048  | 114,62637 | 1206,13899 | 159,83150 | 8,08425  |
| 2013 Drome      | DL13 | Taulignan | 10 J30 | 41,4 forte   | 150,358058 | 106,21832 | 6,95089  | 113,37363 | 1355,76570 | 158,53846 | 12,24382 |
| 2013 Drome      | DL13 | Taulignan | 10 J30 | 41,4 forte   | 164,534798 | 113,92967 | 8,43478  | 146,06960 | 992,29753  | 145,44322 | 10,30586 |
| 2013 Drome      | DL13 | Taulignan | 10 J30 | 41,4 forte   | 172,985348 | 64,26520  | 8,84100  | 136,94505 | 974,77435  | 148,19048 | 9,70192  |
| 2013 LureAlbion | LZ13 | Banon     | 11 J30 | 11,25 faible | 153,76923  | 119,12674 | 8,38908  | 147,97436 | 1279,02489 | 155,91209 | 11,59890 |
| 2013 LureAlbion | LZ13 | Banon     | 11 J30 | 11,25 faible | 164,87271  | 98,24176  | 8,95742  | 154,12454 | 1136,87134 | 139,23443 | 8,18407  |
| 2013 LureAlbion | LZ13 | Banon     | 11 J30 | 11,25 faible | 146,46978  | 105,91209 | 9,95421  | 160,56410 | 1290,89867 | 135,83150 | 9,44277  |
| 2013 LureAlbion | LZ13 | Banon     | 11 J30 | 11,25 faible | 146,772894 | 70,38681  | 7,93521  | 136,83150 | 1042,52545 | 147,97436 | 6,80861  |
| 2013 LureAlbion | LZ13 | Banon     | 11 J30 | 11,25 faible | 144,261904 | 124,24176 | 9,65774  | 172,86447 | 567,39283  | 144,43956 | 7,45742  |
| 2013 LureAlbion | LZ13 | Banon     | 11 J30 | 11,25 faible | 131,0174   | 143,65421 | 8,93178  | 160,63736 | 695,39582  | 149,07692 | 7,65522  |
| 2013 LureAlbion | LZ13 | Banon     | 11 J30 | 11,25 faible | 143,48718  | 147,04469 | 9,12111  | 146,77656 | 1062,38469 | 136,24908 | 7,95696  |
| 2013 LureAlbion | LZ13 | Banon     | 11 J30 | 11,25 faible | 138,65293  | 109,86374 | 8,30151  | 133,10623 | 541,67907  | 144,46520 | 8,79075  |
| 2013 LureAlbion | LZ13 | Banon     | 11 J30 | 11,25 faible | 133,134616 | 118,64908 | 8,99634  | 135,10256 | 865,12268  | 137,48718 | 7,17125  |
| 2013 LureAlbion | LZ13 | Banon     | 11 J30 | 11,25 faible | 164,740842 | 166,11136 | 9,34684  | 141,94505 | 920,71800  | 141,08425 | 10,96978 |
| 2013 LureAlbion | LZ13 | Banon     | 4 J30  | 13,35 faible | NA         | 140,09670 | 6,01099  | 141,68132 | 748,35950  | 140,54945 | 13,70055 |
| 2013 LureAlbion | LZ13 | Banon     | 4 J30  | 13,35 faible | NA         | 139,79780 | 6,30315  | 142,02930 | 693,01088  | 142,95238 | 10,58310 |
| 2013 LureAlbion | LZ13 | Banon     | 4 J30  | 13,35 faible | NA         | 157,75092 | 5,83127  | 157,16484 | NA         | 141,72894 | 11,64469 |
| 2013 LureAlbion | LZ13 | Banon     | 4 J30  | 13,35 faible | NA         | NA        | 5,78365  | NA        | 715,88388  | 145,34432 | 10,54625 |
| 2013 LureAlbion | LZ13 | Banon     | 4 J30  | 13,35 faible | NA         | 135,44469 | 5,10639  | 144,99267 | 493,66885  | 139,21612 | 11,89469 |
| 2013 LureAlbion | LZ13 | Banon     | 4 J30  | 13,35 faible | NA         | 125,67326 | 6,41621  | 134,68498 | 578,66355  | 138,91575 | 13,44231 |
| 2013 LureAlbion | LZ13 | Banon     | 4 J30  | 13,35 faible | NA         | 139,50623 | 4,43269  | 121,00733 | 748,32313  | 134,31136 | 10,97161 |
| 2013 LureAlbion | LZ13 | Banon     | 4 J30  | 13,35 faible | NA         | 159,84469 | 5,60438  | 156,41026 | 633,26715  | 137,22711 | 7,85714  |
| 2013 LureAlbion | LZ13 | Banon     | 4 J30  | 13,35 faible | NA         | 144,06593 | 4,44826  | 142,83150 | 482,83985  | 126,93407 | 7,92262  |

|      |            |      |       |        |              |           |           |         |           |            |           |          |
|------|------------|------|-------|--------|--------------|-----------|-----------|---------|-----------|------------|-----------|----------|
| 2013 | LureAlbion | LZ13 | Banon | 4 J30  | 13,35 faible | NA        | 180,27692 | 4,79693 | 141,99634 | 735,89847  | 144,19780 | 8,02885  |
| 2013 | LureAlbion | LZ13 | Banon | 12 J30 | 17,1 faible  | NA        | 123,32161 | 6,66369 | 132,35348 | 692,57339  | 142,72894 | 7,02129  |
| 2013 | LureAlbion | LZ13 | Banon | 12 J30 | 17,1 faible  | NA        | 97,58535  | 7,96886 | 127,91575 | 831,17969  | 143,00366 | 7,72390  |
| 2013 | LureAlbion | LZ13 | Banon | 12 J30 | 17,1 faible  | NA        | 146,28425 | 7,64045 | 157,09524 | 977,79962  | 145,93773 | 11,09386 |
| 2013 | LureAlbion | LZ13 | Banon | 12 J30 | 17,1 faible  | NA        | 105,27179 | 7,60302 | 172,91209 | 815,59749  | 139,39560 | NA       |
| 2013 | LureAlbion | LZ13 | Banon | 12 J30 | 17,1 faible  | NA        | 114,35604 | 7,22471 | 160,52015 | 811,33463  | 133,01099 | 5,66987  |
| 2013 | LureAlbion | LZ13 | Banon | 12 J30 | 17,1 faible  | NA        | 113,44835 | NA      | 151,76557 | 973,51726  | 140,58608 | 6,69597  |
| 2013 | LureAlbion | LZ13 | Banon | 12 J30 | 17,1 faible  | NA        | 124,80220 | 6,89286 | 128,42857 | 1007,18538 | 144,94505 | 10,05815 |
| 2013 | LureAlbion | LZ13 | Banon | 12 J30 | 17,1 faible  | NA        | 113,84469 | 6,95089 | 139,56777 | 1174,85715 | 137,04762 | 9,41071  |
| 2013 | LureAlbion | LZ13 | Banon | 12 J30 | 17,1 faible  | NA        | 113,92234 | NA      | 173,96703 | 709,76662  | 138,56777 | 5,70147  |
| 2013 | LureAlbion | LZ13 | Banon | 12 J30 | 17,1 faible  | NA        | 125,20733 | 9,96085 | 180,79121 | 789,63221  | 150,10989 | 6,04750  |
| 2013 | LureAlbion | LZ13 | Banon | 1 J30  | 19,65 faible | NA        | 128,51429 | 8,39736 | 163,50916 | 323,18795  | 163,31868 | NA       |
| 2013 | LureAlbion | LZ13 | Banon | 1 J30  | 19,65 faible | NA        | 85,09011  | 8,95742 | 175,97070 | 1063,75078 | 188,30403 | 14,60256 |
| 2013 | LureAlbion | LZ13 | Banon | 1 J30  | 19,65 faible | NA        | 117,03150 | 9,95421 | 155,78022 | 957,12882  | 159,36630 | 10,67903 |
| 2013 | LureAlbion | LZ13 | Banon | 1 J30  | 19,65 faible | NA        | 89,90183  | 7,93521 | 179,41026 | 383,99829  | 153,28938 | 10,69277 |
| 2013 | LureAlbion | LZ13 | Banon | 1 J30  | 19,65 faible | NA        | 97,38901  | 9,65774 | 178,32601 | 336,56616  | 120,54579 | 4,77747  |
| 2013 | LureAlbion | LZ13 | Banon | 1 J30  | 19,65 faible | NA        | 97,27619  | 8,93178 | 169,88645 | 480,59490  | 135,82418 | 8,14744  |
| 2013 | LureAlbion | LZ13 | Banon | 1 J30  | 19,65 faible | NA        | 34,19121  | 9,12111 | 161,69231 | 455,17910  | 149,28205 | 9,14423  |
| 2013 | LureAlbion | LZ13 | Banon | 1 J30  | 19,65 faible | NA        | 115,63370 | 8,30151 | 154,15018 | 735,99591  | 158,50733 | NA       |
| 2013 | LureAlbion | LZ13 | Banon | 1 J30  | 19,65 faible | NA        | 110,77363 | 8,99634 | 173,98535 | 478,26414  | 144,70330 | 8,52106  |
| 2013 | LureAlbion | LZ13 | Banon | 1 J30  | 19,65 faible | NA        | 96,61978  | 9,34684 | 188,91575 | 461,54901  | 140,71062 | 9,76236  |
| 2013 | LureAlbion | LZ13 | Banon | 8 J30  | 20,05 faible | 77,73901  | 101,40659 | 6,61951 | 103,57143 | 477,26877  | 109,15751 | 12,07212 |
| 2013 | LureAlbion | LZ13 | Banon | 8 J30  | 20,05 faible | 88,18956  | 117,38315 | 6,52564 | 105,86081 | 944,11078  | 113,01832 | 8,40522  |
| 2013 | LureAlbion | LZ13 | Banon | 8 J30  | 20,05 faible | 81,827838 | 110,51282 | 5,74382 | 90,32051  | 710,60155  | 127,01099 | 10,69231 |
| 2013 | LureAlbion | LZ13 | Banon | 8 J30  | 20,05 faible | 57,910256 | 85,18535  | 5,49634 | 91,58425  | 574,55530  | 119,05861 | 8,51030  |
| 2013 | LureAlbion | LZ13 | Banon | 8 J30  | 20,05 faible | 68,18315  | 74,98462  | 6,74073 | 118,35531 | 761,68678  | 133,06593 | 13,58883 |
| 2013 | LureAlbion | LZ13 | Banon | 8 J30  | 20,05 faible | 42,70696  | 69,34725  | 4,60783 | 94,56777  | 650,52834  | 124,23077 | 10,84249 |
| 2013 | LureAlbion | LZ13 | Banon | 8 J30  | 20,05 faible | 51,526556 | 95,35678  | 5,93017 | 90,99267  | 1171,95777 | 124,39194 | 12,44712 |
| 2013 | LureAlbion | LZ13 | Banon | 8 J30  | 20,05 faible | 50,698718 | 100,99487 | 5,77404 | 105,31868 | 588,40556  | 124,40293 | 10,14034 |
| 2013 | LureAlbion | LZ13 | Banon | 8 J30  | 20,05 faible | 55,038462 | 130,90110 | 4,93468 | 94,70330  | 865,41777  | 134,94505 | 11,77747 |
| 2013 | LureAlbion | LZ13 | Banon | 8 J30  | 20,05 faible | 51,746336 | 102,70769 | 6,14111 | 106,06960 | 868,55071  | 127,61172 | 10,58059 |
| 2013 | LureAlbion | LZ13 | Banon | 20 J30 | 27,85 forte  | 24,776556 | 50,34872  | 3,77679 | NA        | 568,29757  | 127,41209 | 12,66209 |
| 2013 | LureAlbion | LZ13 | Banon | 20 J30 | 27,85 forte  | 19,45696  | NA        | 2,56685 | 62,91392  | 879,44154  | 143,89377 | 11,88874 |
| 2013 | LureAlbion | LZ13 | Banon | 20 J30 | 27,85 forte  | 44,23077  | 80,30183  | 5,75206 | 101,09890 | 826,81813  | 115,20513 | 7,90188  |
| 2013 | LureAlbion | LZ13 | Banon | 20 J30 | 27,85 forte  | 16,163004 | 63,05348  | 2,24863 | 49,97802  | 775,05216  | 131,72894 | 11,09753 |
| 2013 | LureAlbion | LZ13 | Banon | 20 J30 | 27,85 forte  | 29,807692 | 66,37216  | 3,97894 | NA        | 914,20641  | 128,43956 | 10,06548 |
| 2013 | LureAlbion | LZ13 | Banon | 20 J30 | 27,85 forte  | 32,554946 | 64,98901  | 5,72596 | 106,45421 | 662,21438  | 136,97070 | 11,17949 |
| 2013 | LureAlbion | LZ13 | Banon | 20 J30 | 27,85 forte  | 35,785714 | 73,62418  | 4,51659 | 96,39560  | 853,81751  | 127,82418 | 9,51007  |
| 2013 | LureAlbion | LZ13 | Banon | 20 J30 | 27,85 forte  | 36,182234 | 91,45201  | 5,72036 | 108,73260 | 1046,70988 | 123,37729 | 13,90041 |
| 2013 | LureAlbion | LZ13 | Banon | 20 J30 | 27,85 forte  | 78,217032 | 72,60659  | 6,47527 | 103,92308 | 828,96485  | 131,55311 | 11,60371 |
| 2013 | LureAlbion | LZ13 | Banon | 20 J30 | 27,85 forte  | 75,51511  | 69,86520  | 6,73443 | 125,81685 | NA         | 131,28938 | 8,25733  |

|      |            |      |          |        |             |            |             |         |              |            |              |          |
|------|------------|------|----------|--------|-------------|------------|-------------|---------|--------------|------------|--------------|----------|
| 2013 | LureAlbion | LZ13 | Banon    | 6 J30  | 28 forte    | 86,722528  | 84,15971    | 7,16484 | 122,69963    | 451,60431  | 140,91209    | 9,84112  |
| 2013 | LureAlbion | LZ13 | Banon    | 6 J30  | 28 forte    | 91,48901   | 85,82418    | 6,45536 | 109,55311    | 472,64088  | 131,55311 NA |          |
| 2013 | LureAlbion | LZ13 | Banon    | 6 J30  | 28 forte    | 103,67674  | 119,60000   | 6,67262 | 104,93590    | 600,39831  | 125,40659    | 7,72459  |
| 2013 | LureAlbion | LZ13 | Banon    | 6 J30  | 28 forte    | 92,085164  | 65,49158    | 6,97665 | 120,24176    | 580,16982  | 137,04762    | 9,97482  |
| 2013 | LureAlbion | LZ13 | Banon    | 6 J30  | 28 forte    | 87,630494  | 66,10403    | 6,47527 | 112,09890    | 481,71869  | 130,50183    | 7,30632  |
| 2013 | LureAlbion | LZ13 | Banon    | 6 J30  | 28 forte    | 87,39652   | 103,30696   | 6,98729 | 121,42125    | 273,78259  | 127,09524    | 10,01969 |
| 2013 | LureAlbion | LZ13 | Banon    | 6 J30  | 28 forte    | 95,068682  | 80,74432    | 6,45192 | 91,39744     | 529,84134  | 122,47619    | 8,17628  |
| 2013 | LureAlbion | LZ13 | Banon    | 6 J30  | 28 forte    | 78,747252  | 72,69744    | 6,47161 | 109,91209    | 547,60959  | 131,25275    | 11,29533 |
| 2013 | LureAlbion | LZ13 | Banon    | 6 J30  | 28 forte    | 94,374542  | 95,72454    | 6,42720 | 119,55311    | 924,77607  | 162,23077    | 7,86035  |
| 2013 | LureAlbion | LZ13 | Banon    | 6 J30  | 28 forte    | 85,05403   | 88,85275    | 6,19963 | 120,65201    | 384,74812  | 145,26374    | 10,39103 |
| 2013 | LureAlbion | LZ13 | Banon    | 17 J30 | 28,55 forte | 73,453296  | 92,47326    | 5,77220 | 103,39927    | 433,40772  | 144,02930    | 6,03022  |
| 2013 | LureAlbion | LZ13 | Banon    | 17 J30 | 28,55 forte | 9,880952   | 34,81026    | 1,19849 | 30,30403     | 536,94641  | 131,70696    | 6,00618  |
| 2013 | LureAlbion | LZ13 | Banon    | 17 J30 | 28,55 forte | 78,021062  | 86,18462    | 5,63324 | 89,27656     | 395,11944  | 137,66300    | 9,60760  |
| 2013 | LureAlbion | LZ13 | Banon    | 17 J30 | 28,55 forte | 73,570512  | 45,70110    | 5,93887 | 110,76557    | 366,13331  | 137,53114    | 9,01007  |
| 2013 | LureAlbion | LZ13 | Banon    | 17 J30 | 28,55 forte | 69,537546  | 114,61832   | 5,28869 | 99,68864     | 776,47220  | 136,36996    | 7,19048  |
| 2013 | LureAlbion | LZ13 | Banon    | 17 J30 | 28,55 forte | 86,380952  | 89,29084    | 4,71039 | 89,20879     | 649,32574  | 144,77289    | 7,17033  |
| 2013 | LureAlbion | LZ13 | Banon    | 17 J30 | 28,55 forte | 68,595238  | 112,01758   | 5,05941 | 94,91392     | 511,57244  | 130,56044    | 9,46703  |
| 2013 | LureAlbion | LZ13 | Banon    | 17 J30 | 28,55 forte | 65,34249   | 73,75678 NA |         | 107,08791    | 474,14304  | 138,83150    | 7,43864  |
| 2013 | LureAlbion | LZ13 | Banon    | 17 J30 | 28,55 forte | 68,137362  | 65,59121    | 5,11745 | 93,27106     | 463,55480  | 140,79487    | 5,85165  |
| 2013 | LureAlbion | LZ13 | Banon    | 17 J30 | 28,55 forte | 64,144688  | 73,50110    | 4,82143 | 100,04029    | 463,94611  | 142,19414    | 7,40476  |
| 2013 | LureAlbion | LZ13 | Banon    | 15 J30 | 29,6 forte  | 106,869964 | 102,55238   | 6,54693 | 109,82418    | 629,19660  | 144,17949    | 9,75641  |
| 2013 | LureAlbion | LZ13 | Banon    | 15 J30 | 29,6 forte  | 108,373626 | 32,97363    | 6,17285 | 114,02930    | 695,15927  | 144,72894    | 10,14286 |
| 2013 | LureAlbion | LZ13 | Banon    | 15 J30 | 29,6 forte  | 93,782968  | 77,61319    | 6,34615 | 114,74359    | 621,20113  | 142,21245    | 8,96658  |
| 2013 | LureAlbion | LZ13 | Banon    | 15 J30 | 29,6 forte  | 94,466118  | 94,94945    | 5,67617 | 113,69231    | 472,30300  | 158,42857    | 12,82509 |
| 2013 | LureAlbion | LZ13 | Banon    | 15 J30 | 29,6 forte  | 91,960622  | 69,34725    | 6,11126 | 106,12821    | 654,80056  | 143,06960    | 7,93544  |
| 2013 | LureAlbion | LZ13 | Banon    | 15 J30 | 29,6 forte  | 110,727106 | 135,14872   | 5,37646 | 110,58974    | 616,75634  | 149,52747    | 8,00778  |
| 2013 | LureAlbion | LZ13 | Banon    | 15 J30 | 29,6 forte  | 82,149268  | 82,76484    | 6,12157 | 116,95971    | 1004,77574 | 142,73260    | 8,07875  |
| 2013 | LureAlbion | LZ13 | Banon    | 15 J30 | 29,6 forte  | 88,781136  | 92,96117    | 6,50062 | 118,86813    | 223,84578  | 160,50549    | 6,48810  |
| 2013 | LureAlbion | LZ13 | Banon    | 15 J30 | 29,6 forte  | 112,91392  | 90,72674    | 6,93155 | 124,85714    | 623,48693  | 150,09158    | 10,09890 |
| 2013 | LureAlbion | LZ13 | Banon    | 15 J30 | 29,6 forte  | 98,094322  | 97,93626    | 6,50515 | 119,49817    | 517,48300  | 147,92674    | 10,89744 |
| 2013 | LureAlbion | LZ13 | Banon    | 2 J30  | 31,2 forte  | 90,41392   | 49,84469    | 7,17056 | 128,86813    | 523,43460  | 153,79853    | 7,70467  |
| 2013 | LureAlbion | LZ13 | Banon    | 2 J30  | 31,2 forte  | 98,48489   | 46,57363    | 7,30792 | 132,70330    | 662,20514  | 168,90476    | 7,69574  |
| 2013 | LureAlbion | LZ13 | Banon    | 2 J30  | 31,2 forte  | 100,891026 | 90,59341    | 8,44025 | 144,49084    | 878,14930  | 169,63004    | 9,77473  |
| 2013 | LureAlbion | LZ13 | Banon    | 2 J30  | 31,2 forte  | 98,001832  | 81,82125    | 7,52152 | 131,04396    | 874,48468  | 176,74359    | 10,20742 |
| 2013 | LureAlbion | LZ13 | Banon    | 2 J30  | 31,2 forte  | 111,114468 | 60,79414    | 8,49542 | 149,45055    | 462,84030  | 153,68498    | 8,46016  |
| 2013 | LureAlbion | LZ13 | Banon    | 2 J30  | 31,2 forte  | 89,674908  | 67,68645    | 7,18132 | 129,41941    | 999,78537  | 166,84249    | 8,45788  |
| 2013 | LureAlbion | LZ13 | Banon    | 2 J30  | 31,2 forte  | 89,54304   | 107,73773   | 7,52747 | 115,65201    | 644,33671  | 148,65201    | 8,89835  |
| 2013 | LureAlbion | LZ13 | Banon    | 2 J30  | 31,2 forte  | 102,524726 | 94,07033    | 7,48672 | 128,75092    | 1191,52276 | 176,82784    | 12,38736 |
| 2013 | LureAlbion | LZ13 | Banon    | 2 J30  | 31,2 forte  | 90,163004  | 68,05714    | 7,97424 | 137,99634    | 411,56007  | 159,05861    | 11,10440 |
| 2013 | LureAlbion | LZ13 | Banon    | 2 J30  | 31,2 forte  | 101,671246 | 58,09011    | 7,67857 | 135,72527    | 512,30842  | 170,54945    | 8,72596  |
| 2013 | LureAlbion | LT13 | Vacheres | 13 J30 | 9,35 faible | 48,326924  | 47,31429    | 5,77220 | 126,70513 NA |            | 126,00549    | 10,75016 |

|      |            |      |          |        |              |             |           |         |           |            |           |          |
|------|------------|------|----------|--------|--------------|-------------|-----------|---------|-----------|------------|-----------|----------|
| 2013 | LureAlbion | LT13 | Vacheres | 13 J30 | 9,35 faible  | 63,181318   | NA        | 1,19677 | 101,90476 | 539,93224  | 129,84615 | 8,35577  |
| 2013 | LureAlbion | LT13 | Vacheres | 13 J30 | 9,35 faible  | 80,193682   | 87,52674  | 5,70398 | 111,79121 | 509,07579  | 132,20513 | 12,25000 |
| 2013 | LureAlbion | LT13 | Vacheres | 13 J30 | 9,35 faible  | 78,430402   | 71,14066  | 5,93887 | 110,89011 | 379,91618  | 123,25275 | 10,96360 |
| 2013 | LureAlbion | LT13 | Vacheres | 13 J30 | 9,35 faible  | 83,82326    | 56,94505  | 5,36745 | 104,82784 | 310,77770  | 143,01465 | 11,52129 |
| 2013 | LureAlbion | LT13 | Vacheres | 13 J30 | 9,35 faible  | 85,01282    | 77,83590  | 4,71039 | 115,54579 | 341,09837  | 123,43956 | 9,84203  |
| 2013 | LureAlbion | LT13 | Vacheres | 13 J30 | 9,35 faible  | 78,927656   | 26,37802  | 5,05941 | 91,17216  | 407,53963  | 135,60440 | 12,23764 |
| 2013 | LureAlbion | LT13 | Vacheres | 13 J30 | 9,35 faible  | 65,783882   | 66,64176  | NA      | NA        | 291,41325  | 138,61538 | 6,46245  |
| 2013 | LureAlbion | LT13 | Vacheres | 13 J30 | 9,35 faible  | 102,177198  | 115,55897 | 5,11745 | 113,34066 | 473,82468  | 122,86447 | 10,66987 |
| 2013 | LureAlbion | LT13 | Vacheres | 13 J30 | 9,35 faible  | 75,252748   | 62,41465  | 4,82143 | 113,68132 | 426,19260  | 147,71795 | 7,17170  |
| 2013 | LureAlbion | LT13 | Vacheres | 19 J30 | 10,1 faible  | 126,931318  | 94,10256  | 6,54693 | 93,74908  | 590,82766  | 146,04762 | 18,05288 |
| 2013 | LureAlbion | LT13 | Vacheres | 19 J30 | 10,1 faible  | 112,254578  | 135,10183 | 6,17285 | 114,17582 | NA         | 121,78022 | NA       |
| 2013 | LureAlbion | LT13 | Vacheres | 19 J30 | 10,1 faible  | 98,007326   | 124,48059 | 6,34615 | 97,39927  | 581,44255  | 146,30403 | 8,46635  |
| 2013 | LureAlbion | LT13 | Vacheres | 19 J30 | 10,1 faible  | 97,061356   | 76,32821  | 5,67617 | 100,44139 | 725,59899  | 155,81685 | 14,70284 |
| 2013 | LureAlbion | LT13 | Vacheres | 19 J30 | 10,1 faible  | 107,477106  | 124,65055 | 6,11126 | 106,00183 | 557,47465  | 136,57143 | 14,53114 |
| 2013 | LureAlbion | LT13 | Vacheres | 19 J30 | 10,1 faible  | 98,361722   | 134,54505 | 5,37646 | 113,26007 | 500,08034  | 143,31868 | 14,35577 |
| 2013 | LureAlbion | LT13 | Vacheres | 19 J30 | 10,1 faible  | NA          | 4,08791   | 6,01099 | 128,52381 | 612,84279  | 115,94872 | 5,39698  |
| 2013 | LureAlbion | LT13 | Vacheres | 19 J30 | 10,1 faible  | 119,475274  | 126,19194 | NA      | 123,98535 | 1052,89378 | 159,41026 | 11,18040 |
| 2013 | LureAlbion | LT13 | Vacheres | 19 J30 | 10,1 faible  | 117,855312  | 118,18755 | 6,93155 | 123,80586 | 761,59084  | 131,46886 | 8,61470  |
| 2013 | LureAlbion | LT13 | Vacheres | 19 J30 | 10,1 faible  | 112,835164  | 114,10989 | 6,50515 | 136,83150 | 765,62400  | 155,20147 | 13,27747 |
| 2013 | LureAlbion | LT13 | Vacheres | 6 J30  | 11,65 faible | 115,28022   | 90,65495  | 7,17056 | 134,08425 | 321,25517  | 129,35165 | 9,47115  |
| 2013 | LureAlbion | LT13 | Vacheres | 6 J30  | 11,65 faible | 114,138278  | NA        | 7,30792 | 126,23443 | 500,02399  | NA        | NA       |
| 2013 | LureAlbion | LT13 | Vacheres | 6 J30  | 11,65 faible | 136,427656  | 53,61172  | 8,44025 | 144,41026 | 352,64204  | 125,45055 | 7,97253  |
| 2013 | LureAlbion | LT13 | Vacheres | 6 J30  | 11,65 faible | 118,85989   | 84,24176  | 7,52152 | 155,14652 | 389,25698  | 146,87912 | 7,13530  |
| 2013 | LureAlbion | LT13 | Vacheres | 6 J30  | 11,65 faible | 94,465202   | 96,23956  | 8,49542 | 140,64835 | 550,46255  | 136,64469 | 9,13462  |
| 2013 | LureAlbion | LT13 | Vacheres | 6 J30  | 11,65 faible | 99,771062   | 75,79341  | 7,18132 | 138,01099 | 426,73027  | 128,02198 | NA       |
| 2013 | LureAlbion | LT13 | Vacheres | 6 J30  | 11,65 faible | 97,0174     | 62,86593  | 7,52747 | 131,62637 | 393,36315  | 136,20147 | 7,51786  |
| 2013 | LureAlbion | LT13 | Vacheres | 6 J30  | 11,65 faible | 108,181318  | 113,02857 | 7,48672 | 125,68498 | 334,29624  | 134,67033 | 11,91392 |
| 2013 | LureAlbion | LT13 | Vacheres | 6 J30  | 11,65 faible | 99,76099    | 35,86154  | 7,97424 | 155,92674 | 609,99659  | 143,50183 | 8,37912  |
| 2013 | LureAlbion | LT13 | Vacheres | 6 J30  | 11,65 faible | 104,220696  | 97,32454  | 7,67857 | 128,00000 | 824,95117  | 133,21978 | 11,44734 |
| 2013 | LureAlbion | LT13 | Vacheres | 18 J30 | 11,7 faible  | 58,42582418 | 9,87879   | 3,71463 | 135,78570 | 93,38609   | 208,01046 | 45,52335 |
| 2013 | LureAlbion | LT13 | Vacheres | 18 J30 | 11,7 faible  | 103,5311355 | NA        | 5,30998 | 153,51383 | 670,65951  | 146,37186 | 8,03892  |
| 2013 | LureAlbion | LT13 | Vacheres | 18 J30 | 11,7 faible  | 115,7408425 | NA        | 5,49290 | 155,00194 | NA         | 143,03133 | 9,68338  |
| 2013 | LureAlbion | LT13 | Vacheres | 18 J30 | 11,7 faible  | 115,0989011 | NA        | 5,38782 | 177,53547 | NA         | 132,82295 | 8,54808  |
| 2013 | LureAlbion | LT13 | Vacheres | 18 J30 | 11,7 faible  | 108,8333333 | NA        | 5,23535 | 167,91114 | NA         | 152,30043 | 11,78251 |
| 2013 | LureAlbion | LT13 | Vacheres | 18 J30 | 11,7 faible  | 132,1703297 | NA        | 5,46394 | 170,59935 | NA         | 210,12358 | 46,82921 |
| 2013 | LureAlbion | LT13 | Vacheres | 18 J30 | 11,7 faible  | 120,2115385 | NA        | 5,56319 | 182,24982 | NA         | 159,87660 | 5,94918  |
| 2013 | LureAlbion | LT13 | Vacheres | 18 J30 | 11,7 faible  | 124,6620879 | NA        | 5,74657 | 174,54005 | NA         | 132,43170 | 12,00687 |
| 2013 | LureAlbion | LT13 | Vacheres | 18 J30 | 11,7 faible  | 108,7293956 | NA        | 5,02541 | 164,13578 | NA         | NA        | 7,33654  |
| 2013 | LureAlbion | LT13 | Vacheres | 18 J30 | 11,7 faible  | 106,6080586 | NA        | 5,63919 | NA        | NA         | NA        | 26,18544 |
| 2013 | LureAlbion | LT13 | Vacheres | 20 J30 | 12,55 faible | 138,6167582 | NA        | 6,04190 | 191,33873 | 315,94227  | 146,01103 | 8,61676  |
| 2013 | LureAlbion | LT13 | Vacheres | 20 J30 | 12,55 faible | 182,9271978 | NA        | 6,15591 | 177,90141 | 371,03999  | 163,08297 | 7,82738  |



|      |            |      |          |        |              |             |           |         |           |            |           |          |
|------|------------|------|----------|--------|--------------|-------------|-----------|---------|-----------|------------|-----------|----------|
| 2013 | LureAlbion | LT13 | Vacheres | 20 J30 | 12,55 faible | 156,7765568 | NA        | 6,44025 | 190,88027 | 209,38819  | 162,45497 | 8,79853  |
| 2013 | LureAlbion | LT13 | Vacheres | 20 J30 | 12,55 faible | 151,5549451 | NA        | 7,25801 | 199,58851 | 494,29141  | 167,66334 | 8,75229  |
| 2013 | LureAlbion | LT13 | Vacheres | 20 J30 | 12,55 faible | 185,7513736 | NA        | 6,77701 | 178,93268 | 161,74519  | 159,63332 | 7,67995  |
| 2013 | LureAlbion | LT13 | Vacheres | 20 J30 | 12,55 faible | 164,4862637 | NA        | 6,54533 | 189,22250 | NA         | 158,50491 | 9,28571  |
| 2013 | LureAlbion | LT13 | Vacheres | 20 J30 | 12,55 faible | 153,8090659 | NA        | 6,96612 | 199,62355 | NA         | 159,42610 | 7,22436  |
| 2013 | LureAlbion | LT13 | Vacheres | 20 J30 | 12,55 faible | 150,8067766 | NA        | 6,13690 | 176,72716 | NA         | 178,04027 | NA       |
| 2013 | LureAlbion | LT13 | Vacheres | 20 J30 | 12,55 faible | 136,2042125 | NA        | 7,66140 | 202,90016 | NA         | 170,32588 | NA       |
| 2013 | LureAlbion | LT13 | Vacheres | 20 J30 | 12,55 faible | 128,3864469 | NA        | 7,61630 | 197,50850 | NA         | NA        | NA       |
| 2013 | LureAlbion | LT13 | Vacheres | 8 J30  | 20,95 forte  | 188,7738095 | NA        | 8,51236 | 202,30639 | 847,47596  | 147,93767 | 13,20696 |
| 2013 | LureAlbion | LT13 | Vacheres | 8 J30  | 20,95 forte  | 141,9130037 | NA        | 8,98695 | 200,61380 | 885,46014  | 150,02669 | 8,80082  |
| 2013 | LureAlbion | LT13 | Vacheres | 8 J30  | 20,95 forte  | 133,1346154 | NA        | 8,00755 | 212,59626 | 930,05431  | 142,90093 | 7,55037  |
| 2013 | LureAlbion | LT13 | Vacheres | 8 J30  | 20,95 forte  | 162,3882784 | NA        | 8,86310 | 221,38742 | 894,18477  | 153,66221 | 12,53114 |
| 2013 | LureAlbion | LT13 | Vacheres | 8 J30  | 20,95 forte  | 134,1895604 | NA        | 7,77266 | 213,92284 | 793,87207  | 155,34411 | 9,95009  |
| 2013 | LureAlbion | LT13 | Vacheres | 8 J30  | 20,95 forte  | 140,3076923 | NA        | 8,11767 | 211,32936 | 1102,26333 | 162,55467 | 12,56456 |
| 2013 | LureAlbion | LT13 | Vacheres | 8 J30  | 20,95 forte  | 132,0952381 | NA        | 8,06662 | 187,98866 | 934,85156  | 156,26973 | 15,61951 |
| 2013 | LureAlbion | LT13 | Vacheres | 8 J30  | 20,95 forte  | 148,8635531 | NA        | 8,24016 | 197,20175 | 1050,34660 | 158,70942 | 8,14698  |
| 2013 | LureAlbion | LT13 | Vacheres | 8 J30  | 20,95 forte  | 142,9917582 | NA        | 7,41896 | 182,91356 | 815,77555  | NA        | 14,25412 |
| 2013 | LureAlbion | LT13 | Vacheres | 8 J30  | 20,95 forte  | 134,9203297 | NA        | 6,98832 | 199,26455 | NA         | NA        | 16,46108 |
| 2013 | LureAlbion | LT13 | Vacheres | 7 J30  | 21 forte     | 52,52335165 | 137,38990 | 5,42788 | 95,09617  | 555,52494  | 119,42407 | 9,09478  |
| 2013 | LureAlbion | LT13 | Vacheres | 7 J30  | 21 forte     | 66,31593407 | 167,04646 | 4,31021 | 115,92655 | 504,46065  | 102,24323 | 6,89629  |
| 2013 | LureAlbion | LT13 | Vacheres | 7 J30  | 21 forte     | 131,8406593 | 135,70909 | 5,24657 | 111,50442 | 827,99682  | 122,52112 | 10,13919 |
| 2013 | LureAlbion | LT13 | Vacheres | 7 J30  | 21 forte     | 129,3118132 | 93,21818  | 4,99016 | 121,60520 | 639,27039  | 120,26572 | 8,21978  |
| 2013 | LureAlbion | LT13 | Vacheres | 7 J30  | 21 forte     | 101,8255495 | 143,19394 | 5,11882 | 120,84868 | 571,96180  | 111,66409 | 6,77335  |
| 2013 | LureAlbion | LT13 | Vacheres | 7 J30  | 21 forte     | 134,4725275 | 92,96162  | 4,78549 | 111,69086 | 628,38393  | 120,93482 | 8,72665  |
| 2013 | LureAlbion | LT13 | Vacheres | 7 J30  | 21 forte     | 81,19093407 | 104,69495 | 5,31479 | 127,38557 | 412,43701  | 119,03774 | 10,72527 |
| 2013 | LureAlbion | LT13 | Vacheres | 7 J30  | 21 forte     | 114,135989  | 152,43636 | 5,53846 | 125,05525 | 574,18554  | 119,67729 | 9,16163  |
| 2013 | LureAlbion | LT13 | Vacheres | 7 J30  | 21 forte     | 145,8360806 | 148,73131 | 5,19483 | 126,82752 | 577,65804  | 129,37694 | 9,64698  |
| 2013 | LureAlbion | LT13 | Vacheres | 7 J30  | 21 forte     | 120,2980769 | NA        | NA      | 120,74377 | NA         | NA        | 8,54121  |
| 2013 | LureAlbion | LT13 | Vacheres | 11 J30 | 21,55 forte  | 146,8754579 | 59,78990  | 6,15865 | 140,63050 | 606,88549  | 127,52307 | 8,27473  |
| 2013 | LureAlbion | LT13 | Vacheres | 11 J30 | 21,55 forte  | 140,7252747 | NA        | 6,59684 | 6,94334   | 852,79990  | 127,72724 | 8,65522  |
| 2013 | LureAlbion | LT13 | Vacheres | 11 J30 | 21,55 forte  | 146,8663004 | 47,15152  | 5,45227 | 135,62605 | 796,34873  | 126,34065 | 7,00000  |
| 2013 | LureAlbion | LT13 | Vacheres | 11 J30 | 21,55 forte  | 153,4093407 | 66,69495  | 6,30769 | 142,02483 | 759,97183  | 125,52062 | 9,61355  |
| 2013 | LureAlbion | LT13 | Vacheres | 11 J30 | 21,55 forte  | 133,4450549 | 61,33939  | 5,83951 | 130,93348 | 1093,67167 | 125,41709 | 8,90385  |
| 2013 | LureAlbion | LT13 | Vacheres | 11 J30 | 21,55 forte  | 144,2152015 | 41,54545  | 7,21703 | 149,98101 | 897,20099  | 129,08306 | 9,60577  |
| 2013 | LureAlbion | LT13 | Vacheres | 11 J30 | 21,55 forte  | 134,5164835 | 81,28081  | 5,48466 | 134,18346 | 539,32493  | 131,64980 | 8,09249  |
| 2013 | LureAlbion | LT13 | Vacheres | 11 J30 | 21,55 forte  | 139,4487179 | NA        | 6,52999 | 145,54240 | 1017,83443 | 129,21681 | 7,56777  |
| 2013 | LureAlbion | LT13 | Vacheres | 11 J30 | 21,55 forte  | 163,5769231 | NA        | 7,18292 | 158,59716 | 800,03184  | 124,34794 | 11,45238 |
| 2013 | LureAlbion | LT13 | Vacheres | 11 J30 | 21,55 forte  | 117,7953297 | NA        | 7,38713 | 158,55137 | NA         | 135,09664 | 8,32784  |
| 2013 | LureAlbion | LT13 | Vacheres | 17 J30 | 26,85 forte  | 56,21978022 | 28,13333  | 3,37889 | 100,32415 | 378,84291  | 125,44683 | 7,41575  |
| 2013 | LureAlbion | LT13 | Vacheres | 17 J30 | 26,85 forte  | 135,4299451 | 93,10909  | 7,37431 | 156,32039 | 1074,18270 | 139,47967 | 8,81799  |
| 2013 | LureAlbion | LT13 | Vacheres | 17 J30 | 26,85 forte  | 128,9807692 | 97,16364  | 7,06593 | 160,29490 | 642,46511  | 139,93421 | 9,20238  |

|      |            |      |                |    |     |              |             |           |         |           |            |           |          |
|------|------------|------|----------------|----|-----|--------------|-------------|-----------|---------|-----------|------------|-----------|----------|
| 2013 | LureAlbion | LT13 | Vacheres       | 17 | J30 | 26,85 forte  | 133,0796703 | 100,97778 | 7,02541 | 158,40336 | 427,16988  | 140,05253 | 11,08929 |
| 2013 | LureAlbion | LT13 | Vacheres       | 17 | J30 | 26,85 forte  | 107,0238095 | 68,00606  | 1,39870 | 150,15857 | 545,38564  | 126,77117 | 6,03022  |
| 2013 | LureAlbion | LT13 | Vacheres       | 17 | J30 | 26,85 forte  | 138,217033  | NA        | 1,45696 | 155,73947 | NA         | 147,38360 | 11,49130 |
| 2013 | LureAlbion | LT13 | Vacheres       | 17 | J30 | 26,85 forte  | NA          | NA        | 1,21909 | 110,25248 | NA         | 131,41977 | NA       |
| 2013 | LureAlbion | LT13 | Vacheres       | 17 | J30 | 26,85 forte  | NA          | NA        | 1,19666 | 119,72312 | NA         | 132,64169 | NA       |
| 2013 | LureAlbion | LT13 | Vacheres       | 17 | J30 | 26,85 forte  | NA          | NA        | NA      | 123,93394 | NA         | 132,51835 | NA       |
| 2013 | LureAlbion | LT13 | Vacheres       | 17 | J30 | 26,85 forte  | NA          | NA        | NA      | 123,43841 | NA         | 128,63775 | NA       |
| 2013 | LureAlbion | LT13 | Vacheres       | 2  | J30 | 29,95 forte  | 102,1153846 | 114,89091 | 4,63599 | 118,86361 | 636,09079  | 57,06569  | 9,05220  |
| 2013 | LureAlbion | LT13 | Vacheres       | 2  | J30 | 29,95 forte  | 110,6978022 | 87,36970  | 5,78365 | 106,86389 | 802,03146  | 64,56878  | 8,95559  |
| 2013 | LureAlbion | LT13 | Vacheres       | 2  | J30 | 29,95 forte  | 108,8461538 | 55,26061  | 5,25023 | 110,21225 | 882,56953  | 76,25793  | 7,97207  |
| 2013 | LureAlbion | LT13 | Vacheres       | 2  | J30 | 29,95 forte  | 100,3397436 | 89,18788  | 5,10096 | 114,62941 | 669,31468  | 64,80378  | 7,41277  |
| 2013 | LureAlbion | LT13 | Vacheres       | 2  | J30 | 29,95 forte  | 113,2582418 | 100,38788 | 5,26190 | 110,70328 | 245,36886  | 71,31227  | 7,73420  |
| 2013 | LureAlbion | LT13 | Vacheres       | 2  | J30 | 29,95 forte  | 99,34478022 | 96,68485  | 5,21772 | 112,80336 | 612,56184  | 61,33344  | 7,97940  |
| 2013 | LureAlbion | LT13 | Vacheres       | 2  | J30 | 29,95 forte  | 106,6382784 | 40,05657  | 5,91712 | 108,81512 | 638,56940  | 81,83187  | 7,40293  |
| 2013 | LureAlbion | LT13 | Vacheres       | 2  | J30 | 29,95 forte  | 108,2101648 | NA        | NA      | 112,82066 | 740,99606  | 81,56269  | 8,43223  |
| 2013 | LureAlbion | LT13 | Vacheres       | 2  | J30 | 29,95 forte  | 105,0695971 | NA        | NA      | 115,53998 | 758,29963  | 72,21249  | 8,30998  |
| 2013 | LureAlbion | LT13 | Vacheres       | 2  | J30 | 29,95 forte  | 100,0164835 | NA        | NA      | 118,33157 | 1587,03843 | 79,70690  | 10,43086 |
| 2013 | Valensole  | VX13 | PuimoissonBord | 17 | J30 | 11,95 faible | 147,1277473 | 71,76970  | 6,20788 | 113,57069 | 1193,45799 | 88,40462  | 8,64698  |
| 2013 | Valensole  | VX13 | PuimoissonBord | 17 | J30 | 11,95 faible | 141,3159341 | 129,46667 | 6,05598 | 117,37760 | 1998,16481 | 89,28768  | 10,28205 |
| 2013 | Valensole  | VX13 | PuimoissonBord | 17 | J30 | 11,95 faible | 154,4111722 | 94,20202  | 6,69391 | 122,30975 | 1817,08590 | 69,54453  | 6,45833  |
| 2013 | Valensole  | VX13 | PuimoissonBord | 17 | J30 | 11,95 faible | 180,5064103 | 100,01212 | 7,72424 | 121,74184 | 1521,34530 | 67,87476  | 7,48008  |
| 2013 | Valensole  | VX13 | PuimoissonBord | 17 | J30 | 11,95 faible | 168,2912088 | 97,47071  | 6,69963 | 100,67339 | 1443,80643 | 68,22070  | 5,20559  |
| 2013 | Valensole  | VX13 | PuimoissonBord | 17 | J30 | 11,95 faible | 143,092033  | 82,41818  | 5,23741 | 85,47463  | 1302,16661 | 77,47486  | 8,20513  |
| 2013 | Valensole  | VX13 | PuimoissonBord | 17 | J30 | 11,95 faible | 162,0673077 | 123,00606 | 6,48317 | 98,66360  | 1485,22376 | 96,24248  | 7,67033  |
| 2013 | Valensole  | VX13 | PuimoissonBord | 17 | J30 | 11,95 faible | 147,9304029 | 80,98182  | 6,90865 | 102,36020 | 1200,69869 | 58,27817  | 10,55586 |
| 2013 | Valensole  | VX13 | PuimoissonBord | 17 | J30 | 11,95 faible | 172,456044  | NA        | 8,15957 | 124,11812 | 1233,54937 | 75,62267  | 13,11058 |
| 2013 | Valensole  | VX13 | PuimoissonBord | 17 | J30 | 11,95 faible | 211,418956  | NA        | NA      | 124,37458 | 1721,97251 | NA        | NA       |
| 2013 | Valensole  | VX13 | PuimoissonBord | 16 | J30 | 13,65 faible | 172,3997253 | 87,86667  | 6,81181 | 118,85632 | 1529,06753 | 82,33317  | 9,04533  |
| 2013 | Valensole  | VX13 | PuimoissonBord | 16 | J30 | 13,65 faible | 155,239011  | 138,99798 | 7,48260 | 126,42302 | 2253,96481 | 99,91060  | 16,48077 |
| 2013 | Valensole  | VX13 | PuimoissonBord | 16 | J30 | 13,65 faible | 162,0714286 | 175,70303 | 6,21841 | 126,49825 | 1328,77135 | 61,82926  | 8,79121  |
| 2013 | Valensole  | VX13 | PuimoissonBord | 16 | J30 | 13,65 faible | 152,1909341 | 105,73333 | 7,17308 | 118,98682 | 777,52439  | 75,06688  | 6,72390  |
| 2013 | Valensole  | VX13 | PuimoissonBord | 16 | J30 | 13,65 faible | 152,3461538 | 136,04848 | 7,28194 | 125,61769 | 1577,06616 | 64,29486  | 6,62363  |
| 2013 | Valensole  | VX13 | PuimoissonBord | 16 | J30 | 13,65 faible | 169,6881868 | 5,40606   | 1,37248 | 121,31699 | NA         | 85,42778  | 13,50824 |
| 2013 | Valensole  | VX13 | PuimoissonBord | 16 | J30 | 13,65 faible | NA          | NA        | 1,38049 | 39,24831  | NA         | NA        | NA       |
| 2013 | Valensole  | VX13 | PuimoissonBord | 16 | J30 | 13,65 faible | NA          | NA        | 1,42788 | NA        | -5,43332   | NA        | NA       |
| 2013 | Valensole  | VX13 | PuimoissonBord | 16 | J30 | 13,65 faible | NA          | NA        | 1,39560 | NA        | NA         | NA        | NA       |
| 2013 | Valensole  | VX13 | PuimoissonBord | 16 | J30 | 13,65 faible | NA          | NA        | NA      | NA        | NA         | NA        | NA       |
| 2013 | Valensole  | VX13 | PuimoissonBord | 9  | J30 | 17,65 faible | 124,9203297 | 79,99394  | 4,81090 | 116,33869 | 1403,44515 | 92,60786  | 9,55838  |
| 2013 | Valensole  | VX13 | PuimoissonBord | 9  | J30 | 17,65 faible | 121,2802198 | 101,42222 | 5,10234 | 116,78976 | 1080,34655 | 78,84519  | 7,38324  |
| 2013 | Valensole  | VX13 | PuimoissonBord | 9  | J30 | 17,65 faible | 117,9716117 | 93,76162  | 5,55197 | 124,01653 | 1024,12662 | 106,71337 | 7,00275  |
| 2013 | Valensole  | VX13 | PuimoissonBord | 9  | J30 | 17,65 faible | 102,3717949 | 117,15152 | 4,71978 | 115,95049 | 1282,39943 | 102,91425 | 5,23970  |

|      |           |      |                |        |              |             |           |         |           |            |           |          |
|------|-----------|------|----------------|--------|--------------|-------------|-----------|---------|-----------|------------|-----------|----------|
| 2013 | Valensole | VX13 | PuimoissonBord | 9 J30  | 17,65 faible | 114,9294872 | 97,21818  | 4,51408 | 113,42768 | 1241,31467 | 93,65697  | 7,46772  |
| 2013 | Valensole | VX13 | PuimoissonBord | 9 J30  | 17,65 faible | 141,021978  | 65,09899  | 5,34272 | 122,37348 | 1142,47705 | 96,65697  | 6,76374  |
| 2013 | Valensole | VX13 | PuimoissonBord | 9 J30  | 17,65 faible | 99,52197802 | 87,09697  | 3,72161 | 109,95372 | 1397,50575 | 98,78161  | 7,08608  |
| 2013 | Valensole | VX13 | PuimoissonBord | 9 J30  | 17,65 faible | 97,44139194 | 113,88687 | 3,36607 | 106,59556 | 1502,46956 | 104,05917 | 6,55563  |
| 2013 | Valensole | VX13 | PuimoissonBord | 9 J30  | 17,65 faible | 108,3250916 | NA        | 4,02816 | 104,46908 | 1513,74509 | 100,34586 | 7,62706  |
| 2013 | Valensole | VX13 | PuimoissonBord | 9 J30  | 17,65 faible | 93,13827839 | NA        | NA      | 110,85105 | NA         | 116,03764 | NA       |
| 2013 | Valensole | VX13 | PuimoissonBord | 12 J30 | 20,7 faible  | 116,7371795 | 79,56364  | 4,24863 | 116,69174 | 1344,65576 | 87,51575  | 12,48283 |
| 2013 | Valensole | VX13 | PuimoissonBord | 12 J30 | 20,7 faible  | 99,13827839 | 47,56970  | 4,18922 | 109,07146 | 1490,21546 | 92,69785  | 7,51877  |
| 2013 | Valensole | VX13 | PuimoissonBord | 12 J30 | 20,7 faible  | 123,03663   | 56,33939  | 4,68201 | 123,15053 | 1016,65905 | 91,24504  | 5,76648  |
| 2013 | Valensole | VX13 | PuimoissonBord | 12 J30 | 20,7 faible  | 125,996337  | 74,03636  | 6,08482 | 119,52776 | 988,18496  | 82,51137  | 7,23214  |
| 2013 | Valensole | VX13 | PuimoissonBord | 12 J30 | 20,7 faible  | 133,1987179 | 71,03030  | 5,07486 | 121,08564 | 1184,07288 | 109,90935 | 8,21154  |
| 2013 | Valensole | VX13 | PuimoissonBord | 12 J30 | 20,7 faible  | 121,5989011 | 77,92121  | 5,12225 | 131,30912 | 1416,00905 | 100,99986 | 9,77060  |
| 2013 | Valensole | VX13 | PuimoissonBord | 12 J30 | 20,7 faible  | 122,0512821 | 127,32929 | 4,27976 | 113,62489 | 1054,49011 | 87,42262  | 7,74222  |
| 2013 | Valensole | VX13 | PuimoissonBord | 12 J30 | 20,7 faible  | 119,8177656 | 101,63636 | 5,19643 | 124,45439 | 893,55329  | 77,48181  | 7,20192  |
| 2013 | Valensole | VX13 | PuimoissonBord | 12 J30 | 20,7 faible  | 154,275641  | 61,78788  | 6,95776 | 132,78737 | 898,95991  | 86,87649  | 9,32372  |
| 2013 | Valensole | VX13 | PuimoissonBord | 12 J30 | 20,7 faible  | 129,6217949 | NA        | 5,76202 | 137,67362 | 1253,41784 | 87,31609  | 9,22711  |
| 2013 | Valensole | VX13 | PuimoissonBord | 7 J30  | 22,65 faible | 182,4734432 | 61,36970  | 8,08288 | 142,20686 | 751,11064  | 123,89226 | 7,13233  |
| 2013 | Valensole | VX13 | PuimoissonBord | 7 J30  | 22,65 faible | 125,4661172 | 60,26061  | 6,19551 | 139,94181 | 2456,59610 | 104,63139 | 10,73168 |
| 2013 | Valensole | VX13 | PuimoissonBord | 7 J30  | 22,65 faible | 147,496337  | 80,40404  | 7,53984 | 134,49855 | 1697,31242 | 96,18476  | 7,52610  |
| 2013 | Valensole | VX13 | PuimoissonBord | 7 J30  | 22,65 faible | 156,3717949 | 34,10909  | 6,57097 | 137,31316 | 1900,83816 | 122,62797 | 8,80540  |
| 2013 | Valensole | VX13 | PuimoissonBord | 7 J30  | 22,65 faible | 132,9120879 | 97,60606  | 4,99336 | 126,29818 | 1882,14920 | 96,16502  | 6,73420  |
| 2013 | Valensole | VX13 | PuimoissonBord | 7 J30  | 22,65 faible | 136,4734432 | 42,78788  | 6,11355 | 123,84295 | 1259,52798 | 114,93693 | 6,09684  |
| 2013 | Valensole | VX13 | PuimoissonBord | 7 J30  | 22,65 faible | 144,0054945 | NA        | 5,82189 | 130,79976 | 1871,80154 | 100,56020 | 9,29052  |
| 2013 | Valensole | VX13 | PuimoissonBord | 7 J30  | 22,65 faible | 138,4642857 | NA        | 6,14240 | 130,66395 | 2492,67191 | 114,65127 | 4,78365  |
| 2013 | Valensole | VX13 | PuimoissonBord | 7 J30  | 22,65 faible | 141,8502747 | NA        | 5,88118 | 133,85245 | 2126,89296 | 94,98822  | NA       |
| 2013 | Valensole | VX13 | PuimoissonBord | 7 J30  | 22,65 faible | 135,2930403 | NA        | NA      | 132,98635 | NA         | 28,54317  | NA       |
| 2013 | Valensole | VX13 | PuimoissonBord | 3 J30  | 30,1 forte   | 209,1474359 | 107,28485 | 9,79418 | 58,14206  | 987,20014  | 5,64974   | 5,87637  |
| 2013 | Valensole | VX13 | PuimoissonBord | 3 J30  | 30,1 forte   | 188,25      | 142,29697 | 8,15522 | 41,40136  | 988,74442  | 6,84090   | 5,40453  |
| 2013 | Valensole | VX13 | PuimoissonBord | 3 J30  | 30,1 forte   | 167,0604396 | 91,91515  | 8,93315 | 38,68491  | 841,74055  | 33,94969  | 7,73581  |
| 2013 | Valensole | VX13 | PuimoissonBord | 3 J30  | 30,1 forte   | 136,9972527 | 64,43636  | 7,35062 | 51,72275  | 950,51528  | 20,78116  | 10,82051 |
| 2013 | Valensole | VX13 | PuimoissonBord | 3 J30  | 30,1 forte   | 178,1978022 | 80,68485  | 8,70032 | 47,76207  | 771,00589  | 27,22285  | 7,37363  |
| 2013 | Valensole | VX13 | PuimoissonBord | 3 J30  | 30,1 forte   | 123,9835165 | 71,01818  | 8,60714 | 60,64304  | 1228,49819 | 44,75721  | 6,32692  |
| 2013 | Valensole | VX13 | PuimoissonBord | 3 J30  | 30,1 forte   | 69,96153846 | NA        | 5,73317 | 41,48902  | 1185,26090 | 54,95132  | 6,56250  |
| 2013 | Valensole | VX13 | PuimoissonBord | 3 J30  | 30,1 forte   | 176,4505495 | NA        | 9,54212 | 35,22427  | 1001,20285 | 30,56605  | 8,04533  |
| 2013 | Valensole | VX13 | PuimoissonBord | 3 J30  | 30,1 forte   | 86,47252747 | NA        | 6,94918 | NA        | 940,74498  | NA        | NA       |
| 2013 | Valensole | VX13 | PuimoissonBord | 3 J30  | 30,1 forte   | 97,32417582 | NA        | 6,89354 | NA        | 990,81443  | NA        | NA       |
| 2013 | Valensole | VX13 | PuimoissonBord | 18 J30 | 30,15 forte  | 167,5769231 | 38,69697  | 7,02908 | 33,10778  | 1167,92399 | 47,94535  | 10,19986 |
| 2013 | Valensole | VX13 | PuimoissonBord | 18 J30 | 30,15 forte  | 169,9093407 | 55,21212  | 6,61378 | 52,16739  | 1548,56401 | 36,03226  | 11,35577 |
| 2013 | Valensole | VX13 | PuimoissonBord | 18 J30 | 30,15 forte  | 144,8942308 | 46,32727  | 6,61035 | 44,87476  | 2073,32571 | 48,47405  | 8,54602  |
| 2013 | Valensole | VX13 | PuimoissonBord | 18 J30 | 30,15 forte  | 158,1456044 | NA        | 7,19574 | 35,61627  | 1085,19207 | 39,04924  | 7,07051  |
| 2013 | Valensole | VX13 | PuimoissonBord | 18 J30 | 30,15 forte  | 178,3827839 | NA        | 7,47150 | 49,76642  | 921,16624  | 47,42843  | 11,55357 |

|      |           |      |                |        |             |             |           |          |           |            |           |          |
|------|-----------|------|----------------|--------|-------------|-------------|-----------|----------|-----------|------------|-----------|----------|
| 2013 | Valensole | VX13 | PuimoissonBord | 18 J30 | 30,15 forte | 159,003663  | NA        | 8,20982  | 56,14458  | 1469,62368 | NA        | 8,04212  |
| 2013 | Valensole | VX13 | PuimoissonBord | 18 J30 | 30,15 forte | 146,4450549 | NA        | 6,56662  | 58,20919  | 1451,17994 | NA        | 8,31136  |
| 2013 | Valensole | VX13 | PuimoissonBord | 18 J30 | 30,15 forte | 162,2774725 | NA        | 6,61424  | NA        | 1624,94698 | NA        | 10,58700 |
| 2013 | Valensole | VX13 | PuimoissonBord | 18 J30 | 30,15 forte | 147,9876374 | NA        | 8,35852  | NA        | 1179,34249 | NA        | 6,36538  |
| 2013 | Valensole | VX13 | PuimoissonBord | 18 J30 | 30,15 forte | 122,6181319 | NA        | 7,95261  | NA        | 1266,32037 | NA        | NA       |
| 2013 | Valensole | VX13 | PuimoissonBord | 13 J30 | 30,95 forte | 61,5782967  | 54,11515  | 4,52587  | 65,16247  | 1572,87222 | 45,49465  | 2,61058  |
| 2013 | Valensole | VX13 | PuimoissonBord | 13 J30 | 30,95 forte | 115,5673077 | 85,16970  | 7,12157  | 77,07623  | 1232,21397 | 42,85907  | 9,60852  |
| 2013 | Valensole | VX13 | PuimoissonBord | 13 J30 | 30,95 forte | 133,543956  | 86,74747  | 8,07555  | 67,66902  | 1315,64908 | 52,06605  | 4,22940  |
| 2013 | Valensole | VX13 | PuimoissonBord | 13 J30 | 30,95 forte | 131,6950549 | 94,35758  | 9,52747  | 68,21170  | 1419,54656 | 42,32871  | 9,62042  |
| 2013 | Valensole | VX13 | PuimoissonBord | 13 J30 | 30,95 forte | 120,3195971 | 130,31111 | 8,81479  | 81,25430  | 761,89033  | 46,34891  | 6,91758  |
| 2013 | Valensole | VX13 | PuimoissonBord | 13 J30 | 30,95 forte | 149,9899267 | 92,65455  | 8,38622  | 69,31217  | 742,23728  | 46,94771  | 8,25549  |
| 2013 | Valensole | VX13 | PuimoissonBord | 13 J30 | 30,95 forte | 180,2509158 | NA        | 11,23214 | 82,37217  | 1360,54035 | 31,72838  | 12,19826 |
| 2013 | Valensole | VX13 | PuimoissonBord | 13 J30 | 30,95 forte | 134,8415751 | NA        | 9,22413  | 72,26728  | 677,11898  | 87,41342  | 6,04121  |
| 2013 | Valensole | VX13 | PuimoissonBord | 13 J30 | 30,95 forte | 168,3131868 | NA        | 10,28984 | NA        | 1504,72956 | NA        | 5,56731  |
| 2013 | Valensole | VX13 | PuimoissonBord | 13 J30 | 30,95 forte | 150,5961538 | NA        | 9,87111  | NA        | 1825,87243 | NA        | NA       |
| 2013 | Valensole | VX13 | PuimoissonBord | 14 J30 | 33,05 forte | 137,9496337 | 80,06061  | 7,15797  | 132,74862 | 585,81533  | 98,04823  | 9,11401  |
| 2013 | Valensole | VX13 | PuimoissonBord | 14 J30 | 33,05 forte | 142,7335165 | 73,17172  | 7,02198  | 122,26059 | 515,08969  | 109,18152 | 9,56960  |
| 2013 | Valensole | VX13 | PuimoissonBord | 14 J30 | 33,05 forte | 124,0824176 | 74,29899  | 6,02782  | 108,40769 | 867,33793  | 111,64053 | 9,68223  |
| 2013 | Valensole | VX13 | PuimoissonBord | 14 J30 | 33,05 forte | 135,7225275 | 70,40606  | 5,85302  | 112,17421 | 619,88131  | 107,03567 | 8,69597  |
| 2013 | Valensole | VX13 | PuimoissonBord | 14 J30 | 33,05 forte | 107,1648352 | 91,20606  | 5,37912  | 103,75322 | 866,59105  | 115,93488 | 9,80723  |
| 2013 | Valensole | VX13 | PuimoissonBord | 14 J30 | 33,05 forte | 111,7898352 | 87,70303  | 5,08448  | 100,24244 | 1100,11299 | 121,03633 | 10,53297 |
| 2013 | Valensole | VX13 | PuimoissonBord | 14 J30 | 33,05 forte | 131,8663004 | 89,73333  | 6,00824  | 119,79880 | NA         | 102,95082 | 8,95879  |
| 2013 | Valensole | VX13 | PuimoissonBord | 14 J30 | 33,05 forte | 80,53479853 | NA        | 5,05884  | 121,03001 | NA         | 108,89008 | 8,03091  |
| 2013 | Valensole | VX13 | PuimoissonBord | 14 J30 | 33,05 forte | 99,96565934 | NA        | 5,31983  | 122,84641 | NA         | 123,96421 | 8,71497  |
| 2013 | Valensole | VX13 | PuimoissonBord | 14 J30 | 33,05 forte | 81,63369963 | NA        | 6,22207  | 128,05102 | NA         | 123,67348 | 6,80495  |
| 2013 | Valensole | VX13 | PuimoissonBord | 1 J30  | 35,35 forte | 167,3914835 | 83,97576  | 6,65179  | 145,27184 | 849,46468  | 140,39616 | 8,37408  |
| 2013 | Valensole | VX13 | PuimoissonBord | 1 J30  | 35,35 forte | 160,4358974 | 79,17576  | 7,51305  | 138,48517 | 712,77275  | 145,13555 | 8,06044  |
| 2013 | Valensole | VX13 | PuimoissonBord | 1 J30  | 35,35 forte | 164,1501832 | 75,26869  | 7,16140  | 123,28924 | 1173,85204 | 137,92087 | 7,13942  |
| 2013 | Valensole | VX13 | PuimoissonBord | 1 J30  | 35,35 forte | 155,1401099 | 89,32525  | 6,79773  | 122,11386 | 418,02374  | 146,87445 | 5,39698  |
| 2013 | Valensole | VX13 | PuimoissonBord | 1 J30  | 35,35 forte | 168,6492674 | 78,27071  | 6,92342  | 121,50459 | 1361,51493 | 133,48922 | 4,86538  |
| 2013 | Valensole | VX13 | PuimoissonBord | 1 J30  | 35,35 forte | 147,6620879 | 53,00000  | 6,40179  | 131,45770 | 771,45466  | 143,83469 | 5,00755  |
| 2013 | Valensole | VX13 | PuimoissonBord | 1 J30  | 35,35 forte | 154,8145604 | 51,99394  | 6,15156  | 119,39911 | 766,25140  | 106,42217 | 10,64423 |
| 2013 | Valensole | VX13 | PuimoissonBord | 1 J30  | 35,35 forte | 127,706044  | NA        | 6,94872  | 129,83287 | 836,80208  | 136,60475 | 7,60646  |
| 2013 | Valensole | VX13 | PuimoissonBord | 1 J30  | 35,35 forte | 116,3919414 | NA        | 7,82212  | 157,21233 | NA         | 130,43406 | 7,42216  |
| 2013 | Valensole | VX13 | PuimoissonBord | 1 J30  | 35,35 forte | 126,3049451 | NA        | NA       | NA        | NA         | 129,48007 | NA       |
| 2013 | Valensole | VP13 | Roumoules      | 4 J30  | 6,55 faible | 170,4917582 | 80,89091  | 7,82326  | 166,80714 | 925,08929  | 141,24254 | 7,50962  |
| 2013 | Valensole | VP13 | Roumoules      | 4 J30  | 6,55 faible | 177,3397436 | 72,70707  | 8,26832  | 175,61740 | 727,90014  | 151,62887 | 8,80838  |
| 2013 | Valensole | VP13 | Roumoules      | 4 J30  | 6,55 faible | 225,7820513 | 78,03636  | 8,50549  | 159,42799 | 622,70310  | 113,44875 | 6,46703  |
| 2013 | Valensole | VP13 | Roumoules      | 4 J30  | 6,55 faible | 138,8562271 | 112,81616 | 7,46566  | 174,89324 | 824,48649  | 124,26562 | 6,87981  |
| 2013 | Valensole | VP13 | Roumoules      | 4 J30  | 6,55 faible | 147,6849817 | 94,50101  | 8,23535  | 172,22206 | 756,20112  | 141,56263 | 7,20879  |
| 2013 | Valensole | VP13 | Roumoules      | 4 J30  | 6,55 faible | 128,6327839 | 62,75960  | 7,70536  | 167,35678 | 744,55903  | 144,93857 | 5,40110  |

|                |      |           |        |             |             |           |         |           |            |           |          |
|----------------|------|-----------|--------|-------------|-------------|-----------|---------|-----------|------------|-----------|----------|
| 2013 Valensole | VP13 | Roumoules | 4 J30  | 6,55 faible | 150,8195971 | 73,911111 | 7,99554 | 156,69421 | 443,37358  | 118,55934 | 5,79762  |
| 2013 Valensole | VP13 | Roumoules | 4 J30  | 6,55 faible | 138,8956044 | 102,92121 | 8,01374 | 154,08973 | 776,56288  | 109,18712 | 8,80266  |
| 2013 Valensole | VP13 | Roumoules | 4 J30  | 6,55 faible | 139,206044  | 83,12727  | 6,99485 | 169,69387 | 878,59438  | 135,12119 | 5,28571  |
| 2013 Valensole | VP13 | Roumoules | 4 J30  | 6,55 faible | 135,1684982 | NA        | 7,18155 | 164,19062 | 1565,03058 | 136,46484 | NA       |
| 2013 Valensole | VP13 | Roumoules | 2 J30  | 8,75 faible | 102,7912088 | 53,21818  | 5,96108 | 98,35255  | 1748,67730 | 143,10455 | 12,43223 |
| 2013 Valensole | VP13 | Roumoules | 2 J30  | 8,75 faible | 146,1758242 | 54,76364  | 6,43441 | 110,90325 | 1382,09568 | 195,13288 | 16,35234 |
| 2013 Valensole | VP13 | Roumoules | 2 J30  | 8,75 faible | 110,3983516 | 20,63030  | 5,60691 | 98,10199  | 808,69461  | 140,60887 | 10,12019 |
| 2013 Valensole | VP13 | Roumoules | 2 J30  | 8,75 faible | 129,1684982 | 50,80000  | 6,01603 | 98,39525  | 824,78848  | 130,18741 | 8,18040  |
| 2013 Valensole | VP13 | Roumoules | 2 J30  | 8,75 faible | 127,3612637 | 52,33939  | 6,24141 | 110,86924 | 1247,36684 | 121,66752 | 4,27335  |
| 2013 Valensole | VP13 | Roumoules | 2 J30  | 8,75 faible | 173,6043956 | 40,05455  | 5,61264 | 84,59532  | 1140,88647 | 139,74886 | 9,82005  |
| 2013 Valensole | VP13 | Roumoules | 2 J30  | 8,75 faible | 29,24175824 | NA        | 2,37088 | 82,92745  | 804,80732  | 100,44844 | 6,94460  |
| 2013 Valensole | VP13 | Roumoules | 2 J30  | 8,75 faible | 59,52838828 | NA        | 3,77370 | 98,92724  | 1221,41166 | 122,80741 | 5,17766  |
| 2013 Valensole | VP13 | Roumoules | 2 J30  | 8,75 faible | 82,81593407 | NA        | 5,21497 | 104,08575 | 1491,81213 | 128,49374 | 10,50618 |
| 2013 Valensole | VP13 | Roumoules | 2 J30  | 8,75 faible | 84,38095238 | NA        | 5,69048 | NA        | NA         | 173,67541 | 11,98214 |
| 2013 Valensole | VP13 | Roumoules | 17 J30 | 10,5 faible | 149,3489011 | 37,60404  | 6,22367 | 104,90742 | 661,91374  | 128,73799 | 11,22619 |
| 2013 Valensole | VP13 | Roumoules | 17 J30 | 10,5 faible | 166,2930403 | 69,38788  | 6,07795 | 121,65473 | 1235,99454 | 165,06052 | 23,25458 |
| 2013 Valensole | VP13 | Roumoules | 17 J30 | 10,5 faible | 143,0567766 | 45,85455  | 6,13977 | 112,65731 | 560,28918  | 89,20349  | 6,51168  |
| 2013 Valensole | VP13 | Roumoules | 17 J30 | 10,5 faible | 146,3626374 | 32,77576  | 6,08173 | 105,83065 | 1840,12964 | 125,19923 | 8,73489  |
| 2013 Valensole | VP13 | Roumoules | 17 J30 | 10,5 faible | 152,0068681 | 58,28485  | 6,54853 | 116,12280 | 2233,06057 | 184,87259 | 25,83173 |
| 2013 Valensole | VP13 | Roumoules | 17 J30 | 10,5 faible | 157,8095238 | 43,92121  | 6,28297 | 112,55550 | 1322,86676 | 171,39622 | 33,67720 |
| 2013 Valensole | VP13 | Roumoules | 17 J30 | 10,5 faible | 146,6978022 | 102,15758 | 7,21909 | 126,51031 | 873,55311  | 200,20286 | 16,61767 |
| 2013 Valensole | VP13 | Roumoules | 17 J30 | 10,5 faible | 147,514652  | 96,65455  | 5,98420 | 115,06153 | NA         | 152,88739 | 10,63278 |
| 2013 Valensole | VP13 | Roumoules | 17 J30 | 10,5 faible | 134,0283883 | NA        | 7,64492 | 126,00543 | NA         | 143,49903 | 10,09020 |
| 2013 Valensole | VP13 | Roumoules | 17 J30 | 10,5 faible | 128,8782051 | NA        | 7,50309 | 133,23733 | NA         | 143,18026 | NA       |
| 2013 Valensole | VP13 | Roumoules | 8 J30  | 15 faible   | 152,0755495 | 75,76364  | 7,59867 | 138,97083 | 839,96327  | 111,60901 | 5,22985  |
| 2013 Valensole | VP13 | Roumoules | 8 J30  | 15 faible   | 141,5586081 | 63,50303  | 7,82875 | 152,07503 | 2381,54965 | 186,98798 | 16,90614 |
| 2013 Valensole | VP13 | Roumoules | 8 J30  | 15 faible   | 140,8534799 | 46,29091  | 7,21131 | 137,35268 | 2238,13863 | 210,15601 | 28,41484 |
| 2013 Valensole | VP13 | Roumoules | 8 J30  | 15 faible   | 112,2509158 | 130,44444 | 6,36699 | 125,93801 | 579,19672  | 102,15473 | 8,15156  |
| 2013 Valensole | VP13 | Roumoules | 8 J30  | 15 faible   | 130,3534799 | 61,07879  | 7,29968 | 154,63625 | 1327,00302 | 137,89301 | 4,10668  |
| 2013 Valensole | VP13 | Roumoules | 8 J30  | 15 faible   | 141,5576923 | 76,93333  | 7,28869 | 155,11458 | 1645,11196 | 147,78271 | 5,04670  |
| 2013 Valensole | VP13 | Roumoules | 8 J30  | 15 faible   | 204,2289377 | 38,51515  | 7,50160 | 130,41979 | 674,83476  | 99,73155  | 4,06044  |
| 2013 Valensole | VP13 | Roumoules | 8 J30  | 15 faible   | 170,5238095 | NA        | 8,39057 | 152,07650 | 998,36755  | 129,55036 | 2,15247  |
| 2013 Valensole | VP13 | Roumoules | 8 J30  | 15 faible   | 130,0173993 | NA        | 7,45375 | 130,36804 | 1043,43570 | 120,55430 | NA       |
| 2013 Valensole | VP13 | Roumoules | 8 J30  | 15 faible   | 147,1382784 | NA        | 7,45101 | 147,16731 | 742,21868  | 90,81092  | NA       |
| 2013 Valensole | VP13 | Roumoules | 19 J30 | 16,1 faible | 126,3260073 | 88,03030  | 8,01076 | 139,43061 | 352,69435  | 132,80771 | 10,67949 |
| 2013 Valensole | VP13 | Roumoules | 19 J30 | 16,1 faible | 24,8956044  | 83,29091  | 5,65064 | 47,68595  | 829,75570  | 84,42042  | 7,52793  |
| 2013 Valensole | VP13 | Roumoules | 19 J30 | 16,1 faible | 55,81684982 | 57,89697  | 7,14011 | 136,02461 | 678,30905  | 129,82558 | 10,36126 |
| 2013 Valensole | VP13 | Roumoules | 19 J30 | 16,1 faible | 104,5343407 | 19,12121  | 8,75641 | 146,06790 | 360,63942  | 118,51866 | 6,83288  |
| 2013 Valensole | VP13 | Roumoules | 19 J30 | 16,1 faible | 191,9139194 | 23,61818  | 7,20147 | 119,61575 | 602,27679  | 127,31741 | 10,23535 |
| 2013 Valensole | VP13 | Roumoules | 19 J30 | 16,1 faible | 97,1456044  | NA        | 6,79647 | 113,66168 | NA         | 113,61620 | 8,24657  |
| 2013 Valensole | VP13 | Roumoules | 19 J30 | 16,1 faible | 110,7628205 | NA        | 7,25389 | 131,74850 | NA         | 122,24491 | 7,75137  |

|                |      |           |        |             |             |          |          |           |            |           |          |
|----------------|------|-----------|--------|-------------|-------------|----------|----------|-----------|------------|-----------|----------|
| 2013 Valensole | VP13 | Roumoules | 19 J30 | 16,1 faible | 113,5879121 | NA       | 5,67125  | 103,75879 | NA         | 126,28848 | 8,26923  |
| 2013 Valensole | VP13 | Roumoules | 19 J30 | 16,1 faible | 58,80860806 | NA       | 4,20307  | 85,39942  | NA         | 123,79456 | 9,16346  |
| 2013 Valensole | VP13 | Roumoules | 19 J30 | 16,1 faible | 57,01007326 | NA       | NA       | NA        | NA         | 135,95836 | 9,72207  |
| 2013 Valensole | VP13 | Roumoules | 16 J30 | 31,8 forte  | 180,3502747 | 71,55152 | 8,28915  | 144,95079 | 498,05492  | 151,98925 | 7,11538  |
| 2013 Valensole | VP13 | Roumoules | 16 J30 | 31,8 forte  | 79,84065934 | 54,96970 | 5,99016  | 119,99790 | 952,47362  | 140,45604 | 7,28571  |
| 2013 Valensole | VP13 | Roumoules | 16 J30 | 31,8 forte  | NA          | 52,55152 | 1,30254  | 134,32962 | 818,95384  | 149,24208 | 7,38736  |
| 2013 Valensole | VP13 | Roumoules | 16 J30 | 31,8 forte  | 212,2184066 | 24,08485 | 10,59364 | 160,83236 | 1299,41310 | 146,33805 | 8,76877  |
| 2013 Valensole | VP13 | Roumoules | 16 J30 | 31,8 forte  | 65,96062271 | 44,15758 | 6,49416  | 130,09302 | 1605,52484 | 139,97733 | 4,98077  |
| 2013 Valensole | VP13 | Roumoules | 16 J30 | 31,8 forte  | 70,51923077 | 89,51515 | 6,11012  | 121,76011 | 945,32534  | 137,96717 | 6,76190  |
| 2013 Valensole | VP13 | Roumoules | 16 J30 | 31,8 forte  | 54,27884615 | 46,65455 | 5,51374  | 104,54205 | 932,82560  | 135,92253 | 5,04258  |
| 2013 Valensole | VP13 | Roumoules | 16 J30 | 31,8 forte  | 99,23901099 | NA       | 7,44116  | 144,62137 | 1122,24050 | 136,08759 | 9,43681  |
| 2013 Valensole | VP13 | Roumoules | 16 J30 | 31,8 forte  | 137,4793956 | NA       | 8,63553  | 140,57221 | 1427,87528 | 143,56595 | NA       |
| 2013 Valensole | VP13 | Roumoules | 16 J30 | 31,8 forte  | 142,5782967 | NA       | NA       | 155,99495 | NA         | 137,74432 | NA       |
| 2013 Valensole | VP13 | Roumoules | 10 J30 | 32,05 forte | 191,6950549 | 70,62424 | 9,47665  | 176,16109 | 1035,23314 | 144,02026 | 10,20604 |
| 2013 Valensole | VP13 | Roumoules | 10 J30 | 32,05 forte | 77,52335165 | 64,70707 | 4,04212  | 87,30500  | 861,95817  | 133,33601 | 7,41346  |
| 2013 Valensole | VP13 | Roumoules | 10 J30 | 32,05 forte | 64,63369963 | 33,43030 | 4,79625  | 104,96351 | 1687,29962 | 154,32829 | 10,18498 |
| 2013 Valensole | VP13 | Roumoules | 10 J30 | 32,05 forte | 229,2078755 | 44,64242 | 12,99245 | 194,34223 | 1225,79994 | 145,27428 | 11,44093 |
| 2013 Valensole | VP13 | Roumoules | 10 J30 | 32,05 forte | 130,2921245 | 77,80000 | 7,51694  | 140,43501 | 854,51679  | 141,93044 | 10,03663 |
| 2013 Valensole | VP13 | Roumoules | 10 J30 | 32,05 forte | 107,6630037 | 84,63636 | 7,07395  | 193,14201 | 1181,83830 | 137,59297 | 11,15430 |
| 2013 Valensole | VP13 | Roumoules | 10 J30 | 32,05 forte | 295,3571429 | NA       | 12,22630 | 168,29447 | 1290,42774 | 146,82630 | 9,17537  |
| 2013 Valensole | VP13 | Roumoules | 10 J30 | 32,05 forte | 121,735348  | NA       | 8,75549  | 173,30272 | 985,52496  | 133,80129 | 5,82784  |
| 2013 Valensole | VP13 | Roumoules | 10 J30 | 32,05 forte | 178,9752747 | NA       | 9,04396  | 201,51083 | 925,05142  | 129,91306 | 5,73146  |
| 2013 Valensole | VP13 | Roumoules | 10 J30 | 32,05 forte | 264,6826923 | NA       | 12,23535 | NA        | 1275,81916 | 126,14464 | 12,33425 |
| 2013 Valensole | VP13 | Roumoules | 15 J30 | 34,5 forte  | 94,84065934 | 46,40808 | 5,63233  | 82,60023  | 1133,14400 | 142,64731 | 7,40934  |
| 2013 Valensole | VP13 | Roumoules | 15 J30 | 34,5 forte  | 81,28937729 | 34,89697 | 4,67239  | 88,65118  | 795,69947  | 130,34963 | 7,35577  |
| 2013 Valensole | VP13 | Roumoules | 15 J30 | 34,5 forte  | 112,2298535 | 31,98788 | 5,42033  | 86,27531  | 859,91751  | 137,74433 | 8,26099  |
| 2013 Valensole | VP13 | Roumoules | 15 J30 | 34,5 forte  | 129,8415751 | 46,75152 | 6,24473  | 90,71780  | 776,28311  | 139,22031 | 10,66552 |
| 2013 Valensole | VP13 | Roumoules | 15 J30 | 34,5 forte  | 115,0128205 | 37,24848 | 5,84924  | 90,78343  | 1031,87897 | 124,61744 | 5,38187  |
| 2013 Valensole | VP13 | Roumoules | 15 J30 | 34,5 forte  | 101,3942308 | 33,27273 | 4,95078  | 96,77657  | 1187,95909 | 130,12013 | 8,22299  |
| 2013 Valensole | VP13 | Roumoules | 15 J30 | 34,5 forte  | 151,242674  | NA       | NA       | 115,86016 | 972,20251  | 148,22738 | 4,73901  |
| 2013 Valensole | VP13 | Roumoules | 15 J30 | 34,5 forte  | 80,68406593 | NA       | NA       | 95,48306  | 808,12683  | 140,37786 | 5,66003  |
| 2013 Valensole | VP13 | Roumoules | 15 J30 | 34,5 forte  | 117,1007326 | NA       | NA       | 94,04464  | 751,63154  | 130,94370 | 7,66552  |
| 2013 Valensole | VP13 | Roumoules | 15 J30 | 34,5 forte  | NA          | NA       | NA       | NA        | NA         | NA        | NA       |
| 2013 Valensole | VP13 | Roumoules | 6 J30  | 35,85 forte | 135,8836996 | 43,12727 | 5,77358  | 98,25114  | 934,94785  | 160,27171 | 15,74771 |
| 2013 Valensole | VP13 | Roumoules | 6 J30  | 35,85 forte | 133,5979853 | 34,15152 | 6,13324  | 109,93457 | 944,01874  | 158,56881 | 6,00321  |
| 2013 Valensole | VP13 | Roumoules | 6 J30  | 35,85 forte | 143,7225275 | 31,27273 | 5,47138  | 98,04041  | 837,68673  | 140,39295 | 9,34386  |
| 2013 Valensole | VP13 | Roumoules | 6 J30  | 35,85 forte | 139,7884615 | NA       | 6,06765  | 111,43861 | 683,25256  | 145,78903 | 8,22985  |
| 2013 Valensole | VP13 | Roumoules | 6 J30  | 35,85 forte | 134,6043956 | NA       | 6,05357  | 112,69810 | 724,32755  | 142,66543 | 7,67033  |
| 2013 Valensole | VP13 | Roumoules | 6 J30  | 35,85 forte | 130,1501832 | NA       | 5,76900  | 100,68216 | 531,21039  | 148,78648 | 9,61355  |
| 2013 Valensole | VP13 | Roumoules | 6 J30  | 35,85 forte | 147,2289377 | NA       | 5,27713  | 97,72910  | 931,19767  | 142,75912 | 7,19872  |
| 2013 Valensole | VP13 | Roumoules | 6 J30  | 35,85 forte | 118,8003663 | NA       | 5,94780  | 101,09425 | 788,64708  | 144,20894 | 6,49382  |

|                |      |           |       |    |             |             |           |         |           |            |           |          |
|----------------|------|-----------|-------|----|-------------|-------------|-----------|---------|-----------|------------|-----------|----------|
| 2013 Valensole | VP13 | Roumoules | 6 J30 |    | 35,85 forte | 87,56043956 | NA        | 6,44116 | 121,78244 | NA         | 157,92414 | 6,30220  |
| 2013 Valensole | VP13 | Roumoules | 6 J30 |    | 35,85 forte | 88,86263736 | NA        | 5,66323 | 108,18249 | NA         | 149,06098 | NA       |
| 2013 Valensole | VP13 | Roumoules | 5 J30 |    | 38,65 forte | 108,6776557 | 32,15152  | 7,15419 | 110,99650 | 1760,11973 | 134,56646 | 6,69231  |
| 2013 Valensole | VP13 | Roumoules | 5 J30 |    | 38,65 forte | 117,0192308 | 59,41818  | 7,34718 | 123,32603 | 899,25665  | 130,12479 | 6,70421  |
| 2013 Valensole | VP13 | Roumoules | 5 J30 |    | 38,65 forte | 165,8928571 | 35,30909  | 7,54258 | 138,38651 | 588,87447  | 111,21745 | 5,05403  |
| 2013 Valensole | VP13 | Roumoules | 5 J30 |    | 38,65 forte | 128,0064103 | 41,18788  | 6,69196 | 131,32249 | 894,30312  | 130,86869 | 5,63919  |
| 2013 Valensole | VP13 | Roumoules | 5 J30 |    | 38,65 forte | 111,1730769 | 47,81818  | 8,17193 | 138,48017 | 953,72004  | 128,41862 | 4,40316  |
| 2013 Valensole | VP13 | Roumoules | 5 J30 |    | 38,65 forte | 99,02289377 | 48,38788  | 8,11630 | 127,20297 | 721,69765  | 129,32846 | 6,69231  |
| 2013 Valensole | VP13 | Roumoules | 5 J30 |    | 38,65 forte | 138,0641026 | 63,78788  | 8,32830 | 124,48620 | 456,93722  | 127,17478 | 4,09203  |
| 2013 Valensole | VP13 | Roumoules | 5 J30 |    | 38,65 forte | 149,7664835 | 40,50303  | NA      | 141,44847 | 979,43422  | 133,50783 | 4,52953  |
| 2013 Valensole | VP13 | Roumoules | 5 J30 |    | 38,65 forte | 107,8617216 | NA        | NA      | 129,43505 | 743,43123  | 142,91163 | 4,31937  |
| 2013 Valensole | VP13 | Roumoules | 5 J30 |    | 38,65 forte | 125,1112637 | NA        | NA      | 141,85145 | 1069,13326 | 129,78321 | NA       |
| 2014 Drome     | DE14 | ValaurieS | 8 JO  | NA | faible      | 121,7051282 | 109,28485 | 6,65934 | 103,53939 | 1144,75391 | 101,64272 | 12,25824 |
| 2014 Drome     | DE14 | ValaurieS | 8 JO  | NA | faible      | 121,6410256 | 146,58182 | 7,37935 | 93,29091  | 1287,10034 | 108,46315 | 10,65453 |
| 2014 Drome     | DE14 | ValaurieS | 8 JO  | NA | faible      | 179,6401099 | 97,44242  | 6,44986 | 120,44848 | 1111,21682 | 110,46592 | 12,04121 |
| 2014 Drome     | DE14 | ValaurieS | 8 JO  | NA | faible      | 123,2490842 | 119,26667 | 8,28915 | 109,43636 | 1381,78717 | 107,83093 | 10,48901 |
| 2014 Drome     | DE14 | ValaurieS | 8 JO  | NA | faible      | 172,3424908 | 135,04242 | 5,86310 | 121,14545 | 1567,08464 | 107,76829 | 15,57967 |
| 2014 Drome     | DE14 | ValaurieS | 8 JO  | NA | faible      | 101,6520147 | 169,12727 | 8,19849 | 91,37273  | 954,14594  | 104,49341 | 10,10119 |
| 2014 Drome     | DE14 | ValaurieS | 8 JO  | NA | faible      | 173,1217949 | 178,38788 | 7,71658 | 118,90303 | 1165,39895 | 105,19660 | 10,00641 |
| 2014 Drome     | DE14 | ValaurieS | 8 JO  | NA | faible      | 122,8406593 | 210,36364 | 5,76305 | 116,56970 | 1416,38006 | 99,63310  | 8,59203  |
| 2014 Drome     | DE14 | ValaurieS | 8 JO  | NA | faible      | 82,04761905 | NA        | NA      | 106,41818 | NA         | 102,03163 | 9,05014  |
| 2014 Drome     | DE14 | ValaurieS | 8 JO  | NA | faible      | 87,67765568 | NA        | NA      | 99,16364  | NA         | 107,18106 | NA       |
| 2014 Drome     | DE14 | ValaurieS | 10 JO | NA | faible      | 88,61538462 | 88,19394  | 6,87065 | 109,36970 | 1037,86977 | 109,43895 | 9,06044  |
| 2014 Drome     | DE14 | ValaurieS | 10 JO | NA | faible      | 82,8470696  | 120,78788 | 5,74519 | 104,50303 | 1965,56913 | 112,79584 | 8,83242  |
| 2014 Drome     | DE14 | ValaurieS | 10 JO | NA | faible      | 113,6245421 | 85,62424  | 6,33345 | 107,27879 | 1593,66777 | 112,75555 | 10,61081 |
| 2014 Drome     | DE14 | ValaurieS | 10 JO | NA | faible      | 90,33333333 | 107,83434 | 4,97424 | 99,71818  | 1301,44369 | 105,20486 | 8,86332  |
| 2014 Drome     | DE14 | ValaurieS | 10 JO | NA | faible      | 73,08882784 | 104,72727 | 4,70444 | 90,20000  | 1279,60345 | 105,49717 | 5,97985  |
| 2014 Drome     | DE14 | ValaurieS | 10 JO | NA | faible      | 91,33333333 | 104,62222 | 6,17617 | 131,30909 | 1476,64732 | 106,62312 | 9,64469  |
| 2014 Drome     | DE14 | ValaurieS | 10 JO | NA | faible      | 121,3562271 | 125,58384 | 6,23672 | 109,97576 | 1481,39804 | 114,70559 | 10,47024 |
| 2014 Drome     | DE14 | ValaurieS | 10 JO | NA | faible      | 141,0347985 | 98,67273  | 5,80792 | 99,30909  | 1385,88404 | 108,25673 | 6,91484  |
| 2014 Drome     | DE14 | ValaurieS | 10 JO | NA | faible      | 132,9102564 | 113,47879 | 6,45948 | 108,52121 | 1585,77066 | 111,49009 | 8,75275  |
| 2014 Drome     | DE14 | ValaurieS | 10 JO | NA | faible      | 130,1556777 | NA        | NA      | 120,21212 | 1961,85946 | 112,41477 | 11,29029 |
| 2014 Drome     | DE14 | ValaurieS | 4 JO  | NA | faible      | 153,0824176 | 164,52525 | 8,10394 | 112,76364 | 1432,99595 | 109,38640 | 13,69002 |
| 2014 Drome     | DE14 | ValaurieS | 4 JO  | NA | faible      | 130,8012821 | 182,73131 | 7,98764 | 115,86061 | 779,30162  | 90,60557  | 11,91255 |
| 2014 Drome     | DE14 | ValaurieS | 4 JO  | NA | faible      | 151,1785714 | 103,05455 | 8,80426 | 119,15758 | 1370,41183 | 107,64667 | 15,66529 |
| 2014 Drome     | DE14 | ValaurieS | 4 JO  | NA | faible      | 165,3232601 | 133,66869 | 8,49748 | 124,64848 | 1846,08550 | 110,86725 | 13,37225 |
| 2014 Drome     | DE14 | ValaurieS | 4 JO  | NA | faible      | 131,9349817 | 115,39394 | 8,82555 | 123,59394 | 1745,17584 | 106,84337 | 11,53297 |
| 2014 Drome     | DE14 | ValaurieS | 4 JO  | NA | faible      | 163,8360806 | 167,76970 | 8,86745 | 120,60000 | 1605,94474 | 109,11570 | 12,61767 |
| 2014 Drome     | DE14 | ValaurieS | 4 JO  | NA | faible      | 173,9789377 | 234,15152 | 9,29716 | 118,23030 | 775,94637  | 104,89381 | 12,33654 |
| 2014 Drome     | DE14 | ValaurieS | 4 JO  | NA | faible      | 140,7802198 | 135,72929 | 7,95833 | 113,63030 | 1792,98383 | 103,98615 | 11,25824 |
| 2014 Drome     | DE14 | ValaurieS | 4 JO  | NA | faible      | 142,53663   | 201,96364 | 9,70559 | 119,18788 | 1182,01421 | 122,09394 | 8,89881  |

|            |      |           |    |    |    |        |             |           |         |           |            |           |          |
|------------|------|-----------|----|----|----|--------|-------------|-----------|---------|-----------|------------|-----------|----------|
| 2014 Drome | DE14 | ValaurieS | 4  | JO | NA | faible | 152,2106227 | 91,40606  | NA      | 118,39091 | 1600,25709 | 87,98755  | NA       |
| 2014 Drome | DE14 | ValaurieS | 19 | JO | NA | faible | 140,3333333 | 119,76162 | 6,33059 | 92,36364  | 443,90792  | 108,09858 | 10,31181 |
| 2014 Drome | DE14 | ValaurieS | 19 | JO | NA | faible | 129,1767399 | 115,35354 | 6,92857 | 96,31818  | 875,04618  | 106,26121 | 12,18750 |
| 2014 Drome | DE14 | ValaurieS | 19 | JO | NA | faible | 120,8058608 | 85,50909  | 8,15556 | 103,21818 | 1027,11993 | 105,68630 | 11,30632 |
| 2014 Drome | DE14 | ValaurieS | 19 | JO | NA | faible | 123,4111722 | 78,07273  | 6,49725 | 92,94545  | 523,11448  | 104,48413 | 8,67995  |
| 2014 Drome | DE14 | ValaurieS | 19 | JO | NA | faible | 119,6904762 | 103,86263 | 7,30357 | 104,07273 | 1542,74516 | 105,51225 | 6,94231  |
| 2014 Drome | DE14 | ValaurieS | 19 | JO | NA | faible | 126,2994505 | 111,27879 | 8,04487 | 96,58182  | NA         | 102,36485 | 7,93819  |
| 2014 Drome | DE14 | ValaurieS | 19 | JO | NA | faible | 139,8598901 | 131,14747 | 7,18269 | 100,01212 | NA         | 104,00987 | 5,79327  |
| 2014 Drome | DE14 | ValaurieS | 19 | JO | NA | faible | 145,1172161 | 125,87879 | 6,55185 | 96,04242  | NA         | 106,61491 | 9,97207  |
| 2014 Drome | DE14 | ValaurieS | 19 | JO | NA | faible | 79,91758242 | 87,17576  | 6,80311 | 100,97576 | NA         | 105,89147 | NA       |
| 2014 Drome | DE14 | ValaurieS | 19 | JO | NA | faible | 95,86630037 | NA        | 7,01671 | 102,31515 | NA         | 104,30757 | NA       |
| 2014 Drome | DE14 | ValaurieS | 9  | JO | NA | faible | 85,99175824 | 95,15758  | 6,07005 | 90,15455  | 2544,44961 | 87,35452  | 14,60943 |
| 2014 Drome | DE14 | ValaurieS | 9  | JO | NA | faible | 90,49725275 | 113,50303 | 7,19677 | 94,81818  | 1789,76128 | 105,15116 | 12,80403 |
| 2014 Drome | DE14 | ValaurieS | 9  | JO | NA | faible | 69,69139194 | 88,24646  | 4,91449 | 86,35758  | 1639,05520 | 101,68857 | 7,88942  |
| 2014 Drome | DE14 | ValaurieS | 9  | JO | NA | faible | 94,71611722 | 119,73939 | 6,53365 | 90,89697  | 1755,15224 | 110,09908 | 11,60371 |
| 2014 Drome | DE14 | ValaurieS | 9  | JO | NA | faible | 85,92032967 | 112,76364 | 7,40453 | 99,52121  | 2574,81304 | 104,73871 | 12,85394 |
| 2014 Drome | DE14 | ValaurieS | 9  | JO | NA | faible | 91,56959707 | 133,51919 | 7,78056 | 95,65455  | 1275,78818 | 100,16734 | 5,91758  |
| 2014 Drome | DE14 | ValaurieS | 9  | JO | NA | faible | 122,3406593 | 107,18384 | 7,07784 | 105,17576 | 1950,98209 | 96,33091  | 12,27473 |
| 2014 Drome | DE14 | ValaurieS | 9  | JO | NA | faible | 134,0668498 | 101,28485 | 8,28205 | 102,38182 | 1414,40891 | 98,08625  | 9,29258  |
| 2014 Drome | DE14 | ValaurieS | 9  | JO | NA | faible | 118,3937729 | NA        | NA      | 99,14545  | 1796,86213 | 90,97300  | 11,85508 |
| 2014 Drome | DE14 | ValaurieS | 9  | JO | NA | faible | 140,6758242 | NA        | NA      | 116,38182 | 2750,44978 | NA        | 11,74679 |
| 2014 Drome | DE14 | ValaurieS | 14 | JO | NA | forte  | 117,8443223 | 130,00000 | 6,92628 | 98,18182  | 768,04570  | 109,38724 | 7,27129  |
| 2014 Drome | DE14 | ValaurieS | 14 | JO | NA | forte  | 129,6712454 | 192,04848 | 7,06296 | 98,50909  | 2193,87290 | 105,45246 | 12,35485 |
| 2014 Drome | DE14 | ValaurieS | 14 | JO | NA | forte  | 141,3727106 | 118,70909 | 9,93796 | 110,41818 | 1866,16653 | 91,57346  | 11,22115 |
| 2014 Drome | DE14 | ValaurieS | 14 | JO | NA | forte  | 134,6712454 | 166,98788 | 8,43372 | 102,75152 | 1656,41074 | 97,44009  | 14,03938 |
| 2014 Drome | DE14 | ValaurieS | 14 | JO | NA | forte  | 132,7362637 | 219,87879 | 8,18201 | 101,20000 | 1858,92050 | 102,02796 | 13,87042 |
| 2014 Drome | DE14 | ValaurieS | 14 | JO | NA | forte  | 138,4945055 | 139,69091 | 9,30014 | 105,36970 | 1618,42938 | 95,63185  | 12,37592 |
| 2014 Drome | DE14 | ValaurieS | 14 | JO | NA | forte  | 154,3992674 | 182,89697 | 8,31204 | 105,97576 | 2235,24084 | 98,06434  | 9,62843  |
| 2014 Drome | DE14 | ValaurieS | 14 | JO | NA | forte  | 134,5091575 | 158,72727 | 7,76614 | 104,33939 | 1650,48925 | 99,47717  | 10,42491 |
| 2014 Drome | DE14 | ValaurieS | 14 | JO | NA | forte  | 130,1117216 | 131,21212 | 7,37878 | 93,31515  | 2274,73700 | 94,34217  | 14,73970 |
| 2014 Drome | DE14 | ValaurieS | 14 | JO | NA | forte  | 128,2335165 | 176,01212 | NA      | 96,07879  | NA         | 106,24496 | 10,33196 |
| 2014 Drome | DE14 | ValaurieS | 20 | JO | NA | forte  | 127,4230769 | 120,30707 | 6,09547 | 94,93333  | 1630,89718 | 115,86911 | 10,67811 |
| 2014 Drome | DE14 | ValaurieS | 20 | JO | NA | forte  | 147,5128205 | 128,94949 | 6,26030 | 85,85152  | 1232,45976 | 115,66729 | 11,38782 |
| 2014 Drome | DE14 | ValaurieS | 20 | JO | NA | forte  | 169,9532967 | 88,75960  | 7,41071 | 102,56364 | 1391,91257 | 119,75304 | 10,41277 |
| 2014 Drome | DE14 | ValaurieS | 20 | JO | NA | forte  | 140,275641  | 106,01212 | 6,82509 | 106,58788 | 1544,91355 | 112,85867 | 12,79739 |
| 2014 Drome | DE14 | ValaurieS | 20 | JO | NA | forte  | 116,6904762 | 116,70303 | 6,10737 | 98,23030  | 1509,43401 | 112,95363 | 13,43086 |
| 2014 Drome | DE14 | ValaurieS | 20 | JO | NA | forte  | 122,7142857 | 122,29091 | 6,68292 | 95,63030  | 1246,35905 | 113,06423 | 9,41758  |
| 2014 Drome | DE14 | ValaurieS | 20 | JO | NA | forte  | 127,4395604 | 119,29697 | 7,01923 | 102,55758 | 1424,76679 | 113,14506 | 10,72024 |
| 2014 Drome | DE14 | ValaurieS | 20 | JO | NA | forte  | 126,2857143 | 97,98182  | 6,28709 | 92,23636  | 1646,76220 | 119,51009 | 12,11195 |
| 2014 Drome | DE14 | ValaurieS | 20 | JO | NA | forte  | 95,79761905 | NA        | 6,47562 | 101,03030 | 1438,72745 | 123,65526 | 9,86813  |
| 2014 Drome | DE14 | ValaurieS | 20 | JO | NA | forte  | 110,3562271 | NA        | 5,03674 | 84,72424  | 784,75292  | 117,70983 | 10,03938 |



|            |      |           |       |    |        |             |           |         |           |            |           |          |
|------------|------|-----------|-------|----|--------|-------------|-----------|---------|-----------|------------|-----------|----------|
| 2014 Drome | DE14 | ValaurieS | 22 JO | NA | forte  | 95,92216117 | 121,55960 | 6,27724 | 97,31515  | 538,14198  | 119,29238 | 11,15201 |
| 2014 Drome | DE14 | ValaurieS | 22 JO | NA | forte  | 100,5430403 | 153,39394 | 6,44048 | 101,29697 | 1046,73256 | 117,26153 | 12,90339 |
| 2014 Drome | DE14 | ValaurieS | 22 JO | NA | forte  | 89,96336996 | 111,24242 | 6,66621 | 98,22424  | 619,89506  | 116,73098 | 15,27244 |
| 2014 Drome | DE14 | ValaurieS | 22 JO | NA | forte  | 107,5054945 | 110,20606 | 7,36470 | 111,79697 | 820,65724  | 110,94896 | 13,36218 |
| 2014 Drome | DE14 | ValaurieS | 22 JO | NA | forte  | 110,0064103 | 102,98182 | 6,07074 | 94,55152  | 822,24838  | 114,86391 | 8,43361  |
| 2014 Drome | DE14 | ValaurieS | 22 JO | NA | forte  | 99,59249084 | NA        | 7,64652 | 94,68485  | 664,33775  | 122,95987 | 8,54808  |
| 2014 Drome | DE14 | ValaurieS | 22 JO | NA | forte  | 144,5398352 | NA        | 7,66094 | 103,29697 | 904,24475  | 118,53618 | 11,46383 |
| 2014 Drome | DE14 | ValaurieS | 22 JO | NA | forte  | 133,9615385 | NA        | 7,61699 | 105,95152 | 1207,28394 | 118,73038 | 10,64057 |
| 2014 Drome | DE14 | ValaurieS | 22 JO | NA | forte  | 165,5851648 | NA        | 7,86195 | 114,55152 | 847,54916  | 117,84133 | 11,16209 |
| 2014 Drome | DE14 | ValaurieS | 22 JO | NA | forte  | 125,5815018 | NA        | NA      | 110,00000 | 1298,12527 | 127,79109 | 9,02198  |
| 2014 Drome | DE14 | ValaurieS | 11 JO | NA | forte  | 138,1217949 | 157,34141 | 6,14698 | 101,85455 | 1459,00770 | 105,96396 | 6,71703  |
| 2014 Drome | DE14 | ValaurieS | 11 JO | NA | forte  | 141,8424908 | 126,65455 | 6,73901 | 97,35758  | 2035,02233 | 111,33639 | 6,76992  |
| 2014 Drome | DE14 | ValaurieS | 11 JO | NA | forte  | 141,6199634 | 189,30505 | 6,28755 | 99,32424  | 1500,16431 | 117,36582 | 9,22985  |
| 2014 Drome | DE14 | ValaurieS | 11 JO | NA | forte  | 135,974359  | 131,39394 | 7,70765 | 108,42424 | 1569,97793 | 119,20028 | 7,20673  |
| 2014 Drome | DE14 | ValaurieS | 11 JO | NA | forte  | 116,6282051 | 80,12727  | 5,80014 | 102,83030 | 1415,39011 | 115,08838 | 9,76694  |
| 2014 Drome | DE14 | ValaurieS | 11 JO | NA | forte  | 129,271978  | 172,44848 | 6,27438 | 90,58788  | 1689,25933 | 107,67016 | 4,57280  |
| 2014 Drome | DE14 | ValaurieS | 11 JO | NA | forte  | 131,5210623 | 140,89091 | 7,37111 | 94,06667  | 2161,47011 | 108,25048 | 11,16621 |
| 2014 Drome | DE14 | ValaurieS | 11 JO | NA | forte  | 119,7115385 | 173,69697 | 6,45032 | 94,20000  | 1356,33819 | 113,87649 | 4,84547  |
| 2014 Drome | DE14 | ValaurieS | 11 JO | NA | forte  | 119,9029304 | 113,33333 | NA      | 95,90303  | 1748,22782 | 104,64763 | 8,98947  |
| 2014 Drome | DE14 | ValaurieS | 11 JO | NA | forte  | 113,6034799 | 123,58182 | NA      | 90,52727  | 1388,84976 | 105,60749 | NA       |
| 2014 Drome | DE14 | ValaurieS | 16 JO | NA | forte  | 107,2701465 | 157,71313 | 5,88988 | 96,15758  | 1116,38555 | 111,97278 | 11,59203 |
| 2014 Drome | DE14 | ValaurieS | 16 JO | NA | forte  | 112,3855311 | 118,49293 | 6,41484 | 89,92727  | 1314,67532 | 119,31648 | 11,44689 |
| 2014 Drome | DE14 | ValaurieS | 16 JO | NA | forte  | 112,1794872 | 113,11515 | 5,31227 | 84,73030  | 1229,37864 | 132,72023 | 10,02473 |
| 2014 Drome | DE14 | ValaurieS | 16 JO | NA | forte  | 106,5833333 | 105,61818 | 6,36218 | 97,91515  | 1132,39577 | 133,83922 | 8,10852  |
| 2014 Drome | DE14 | ValaurieS | 16 JO | NA | forte  | 121,4386447 | 151,76162 | 6,47562 | 100,53333 | 1340,90749 | 134,64810 | 13,00870 |
| 2014 Drome | DE14 | ValaurieS | 16 JO | NA | forte  | 115,1858974 | 122,90505 | 5,15133 | 86,33939  | 1216,00532 | 128,75613 | 6,57486  |
| 2014 Drome | DE14 | ValaurieS | 16 JO | NA | forte  | 114,8003663 | 106,38182 | 5,13324 | 93,54848  | 1673,27830 | 113,87472 | 8,85234  |
| 2014 Drome | DE14 | ValaurieS | 16 JO | NA | forte  | 111,6089744 | NA        | 4,14766 | 88,26061  | 1647,89663 | 128,02315 | 6,92651  |
| 2014 Drome | DE14 | ValaurieS | 16 JO | NA | forte  | 77,21153846 | NA        | 6,67926 | 96,26061  | NA         | 113,46244 | 9,66392  |
| 2014 Drome | DE14 | ValaurieS | 16 JO | NA | forte  | 84,21245421 | NA        | NA      | 99,87273  | NA         | 113,14301 | 15,38553 |
| 2014 Drome | DG14 | Vinsobres | 15 JO | NA | faible | 120,3324176 | 167,98384 | 5,87706 | 103,36970 | 1673,85241 | 133,94895 | 14,88965 |
| 2014 Drome | DG14 | Vinsobres | 15 JO | NA | faible | 93,12087912 | 250,21212 | 7,06136 | 92,60606  | 1321,19742 | 138,10724 | 11,58150 |
| 2014 Drome | DG14 | Vinsobres | 15 JO | NA | faible | 93,21428571 | 206,86061 | 7,47699 | 96,95758  | 1356,47306 | 123,17311 | 14,40568 |
| 2014 Drome | DG14 | Vinsobres | 15 JO | NA | faible | 97,33608059 | 151,74141 | 7,92411 | 101,89697 | 1534,49560 | 131,76596 | 8,85027  |
| 2014 Drome | DG14 | Vinsobres | 15 JO | NA | faible | 98,46978022 | 166,72727 | 7,08471 | 96,67273  | 647,17097  | 137,08597 | 11,73397 |
| 2014 Drome | DG14 | Vinsobres | 15 JO | NA | faible | 92,81868132 | 117,12323 | NA      | 105,92121 | 1613,24756 | 124,51924 | 14,03114 |
| 2014 Drome | DG14 | Vinsobres | 15 JO | NA | faible | 119,2271062 | 122,14545 | NA      | 105,93333 | 670,81677  | 134,60547 | 10,16896 |
| 2014 Drome | DG14 | Vinsobres | 15 JO | NA | faible | 126,6172161 | 179,48283 | NA      | 93,95152  | 677,52371  | 129,51249 | 9,92811  |
| 2014 Drome | DG14 | Vinsobres | 15 JO | NA | faible | 125,2362637 | NA        | NA      | 97,18182  | 1013,92392 | 135,97279 | 13,66117 |
| 2014 Drome | DG14 | Vinsobres | 15 JO | NA | faible | 122,9203297 | NA        | NA      | 105,98182 | 1195,72722 | 137,95295 | 11,17033 |
| 2014 Drome | DG14 | Vinsobres | 11 JO | NA | faible | 122,4656593 | 178,78182 | 6,53984 | 97,25758  | 1783,51499 | 143,47223 | 7,65110  |

|            |      |           |       |    |        |             |           |          |           |            |           |          |
|------------|------|-----------|-------|----|--------|-------------|-----------|----------|-----------|------------|-----------|----------|
| 2014 Drome | DG14 | Vinsobres | 11 JO | NA | faible | 126,7591575 | 194,56970 | 7,40659  | 96,77576  | 1760,98240 | 126,58379 | 8,68086  |
| 2014 Drome | DG14 | Vinsobres | 11 JO | NA | faible | 125,3507326 | 148,40808 | 7,18407  | 106,33939 | 1081,57505 | 146,71247 | 10,36172 |
| 2014 Drome | DG14 | Vinsobres | 11 JO | NA | faible | 114,4835165 | 126,06869 | 7,84592  | 99,44242  | 543,01373  | 140,78202 | 10,51419 |
| 2014 Drome | DG14 | Vinsobres | 11 JO | NA | faible | 134,3058608 | 171,95758 | 8,27015  | 104,90303 | 1498,44497 | 135,97496 | 9,76854  |
| 2014 Drome | DG14 | Vinsobres | 11 JO | NA | faible | 135,4661172 | 150,65455 | 7,59272  | 99,61818  | 1486,55440 | 134,20124 | 8,60646  |
| 2014 Drome | DG14 | Vinsobres | 11 JO | NA | faible | 146,1300366 | 210,89293 | 8,36161  | 103,03636 | 1278,79110 | 138,06907 | 10,37592 |
| 2014 Drome | DG14 | Vinsobres | 11 JO | NA | faible | 140,2124542 | 107,34545 | 8,60462  | 102,78182 | 2204,21146 | 138,26722 | 7,19986  |
| 2014 Drome | DG14 | Vinsobres | 11 JO | NA | faible | 148,2637363 | 156,42828 | 8,40556  | 94,89091  | 1981,21920 | 132,71369 | 7,75343  |
| 2014 Drome | DG14 | Vinsobres | 11 JO | NA | faible | 127,9194139 | 175,09899 | NA       | 93,31212  | 1722,33223 | 132,56738 | 9,27198  |
| 2014 Drome | DG14 | Vinsobres | 24 JO | NA | faible | 132,6749084 | 213,94343 | 7,26889  | 95,82424  | 572,52759  | 144,61750 | 9,83745  |
| 2014 Drome | DG14 | Vinsobres | 24 JO | NA | faible | 105,0860806 | 157,15960 | 7,58516  | 96,60606  | 1203,78983 | 148,91918 | 18,11996 |
| 2014 Drome | DG14 | Vinsobres | 24 JO | NA | faible | 112,8974359 | 134,60202 | 7,64721  | 104,26061 | 716,60243  | 161,75966 | 15,10531 |
| 2014 Drome | DG14 | Vinsobres | 24 JO | NA | faible | 108,3324176 | 121,27273 | 7,22768  | 100,42424 | 756,48030  | 146,66939 | 23,18819 |
| 2014 Drome | DG14 | Vinsobres | 24 JO | NA | faible | 135,6355311 | 223,26061 | 6,65408  | 98,28485  | 933,16664  | 150,43023 | 17,19368 |
| 2014 Drome | DG14 | Vinsobres | 24 JO | NA | faible | 98,68315018 | 128,54545 | 7,46635  | 103,95758 | 1243,20219 | 153,83626 | 18,07830 |
| 2014 Drome | DG14 | Vinsobres | 24 JO | NA | faible | 151,7564103 | 124,87677 | 8,00939  | 99,11515  | 975,17290  | 152,78294 | 22,11813 |
| 2014 Drome | DG14 | Vinsobres | 24 JO | NA | faible | 101,264652  | 175,34141 | 6,21291  | 96,27273  | NA         | 152,65113 | 14,87637 |
| 2014 Drome | DG14 | Vinsobres | 24 JO | NA | faible | 80,96336996 | 125,78182 | 6,65968  | 100,58182 | NA         | 139,97405 | 16,50733 |
| 2014 Drome | DG14 | Vinsobres | 24 JO | NA | faible | 127,7014652 | 183,94343 | 6,57601  | 97,80000  | NA         | 151,82868 | 17,42903 |
| 2014 Drome | DG14 | Vinsobres | 21 JO | NA | faible | 112,2802198 | 141,39394 | 5,91964  | 90,88485  | 845,17068  | 146,30310 | 16,96062 |
| 2014 Drome | DG14 | Vinsobres | 21 JO | NA | faible | 72,02106227 | 123,34141 | 6,39595  | 93,74545  | 864,80838  | 148,65410 | 14,43452 |
| 2014 Drome | DG14 | Vinsobres | 21 JO | NA | faible | 76,94413919 | 140,53737 | 7,75710  | 91,55758  | 535,20363  | 138,08564 | 12,97344 |
| 2014 Drome | DG14 | Vinsobres | 21 JO | NA | faible | 93,24175824 | 168,40606 | 6,38027  | 102,09091 | 696,59425  | 153,02889 | 15,27198 |
| 2014 Drome | DG14 | Vinsobres | 21 JO | NA | faible | 76,37820513 | 220,87677 | 7,78915  | 97,63333  | 1363,12994 | 162,95137 | 19,55357 |
| 2014 Drome | DG14 | Vinsobres | 21 JO | NA | faible | 83,51648352 | 158,64242 | 6,79716  | 98,01818  | 853,13223  | 152,19510 | 22,70009 |
| 2014 Drome | DG14 | Vinsobres | 21 JO | NA | faible | 109,0210623 | 134,54545 | 7,54144  | 108,06061 | NA         | 155,60886 | 18,39515 |
| 2014 Drome | DG14 | Vinsobres | 21 JO | NA | faible | 114,456044  | 226,64646 | 7,45765  | 99,60000  | NA         | 145,15119 | 11,53228 |
| 2014 Drome | DG14 | Vinsobres | 21 JO | NA | faible | 116,1886447 | 167,43838 | NA       | 97,21212  | NA         | 160,82277 | 16,04190 |
| 2014 Drome | DG14 | Vinsobres | 21 JO | NA | faible | 100,8406593 | 142,68687 | NA       | 102,76061 | NA         | 138,67417 | 11,97734 |
| 2014 Drome | DG14 | Vinsobres | 18 JO | NA | faible | 129,0705128 | 131,54343 | 7,26133  | 97,38788  | 891,62050  | 140,95370 | 9,87317  |
| 2014 Drome | DG14 | Vinsobres | 18 JO | NA | faible | 139,1840659 | 178,40808 | 8,06914  | 93,29697  | 1210,60113 | 149,22883 | 9,01305  |
| 2014 Drome | DG14 | Vinsobres | 18 JO | NA | faible | 129,0457875 | 186,53939 | 8,46795  | 103,02424 | 816,86663  | 147,21921 | 11,25962 |
| 2014 Drome | DG14 | Vinsobres | 18 JO | NA | faible | 139,3717949 | 216,40404 | 8,84455  | 101,20000 | 889,53308  | 143,70189 | 9,16529  |
| 2014 Drome | DG14 | Vinsobres | 18 JO | NA | faible | 107,231685  | 117,95152 | 7,72665  | 103,73333 | 604,69093  | 138,77252 | 10,13462 |
| 2014 Drome | DG14 | Vinsobres | 18 JO | NA | faible | 105,7509158 | 147,35152 | 8,44162  | 99,64848  | 1105,15152 | 158,70541 | 10,54533 |
| 2014 Drome | DG14 | Vinsobres | 18 JO | NA | faible | 113,2637363 | 207,90303 | 7,59203  | 96,26061  | 669,22753  | 143,77528 | 14,59066 |
| 2014 Drome | DG14 | Vinsobres | 18 JO | NA | faible | 126,9395604 | 198,82424 | 8,77610  | 102,07273 | NA         | 135,62223 | 9,56777  |
| 2014 Drome | DG14 | Vinsobres | 18 JO | NA | faible | 136,1272894 | 102,84848 | 9,44368  | 104,89091 | NA         | 139,39965 | 9,06227  |
| 2014 Drome | DG14 | Vinsobres | 18 JO | NA | faible | 145,8864469 | 126,06061 | 10,67891 | 109,37576 | NA         | 137,73001 | 9,30128  |
| 2014 Drome | DG14 | Vinsobres | 20 JO | NA | forte  | 91,50457875 | 123,45455 | 7,58837  | 106,44242 | 834,24742  | 152,26251 | 11,57601 |
| 2014 Drome | DG14 | Vinsobres | 20 JO | NA | forte  | 99,3003663  | 138,12727 | 6,94368  | 95,74545  | 820,91204  | 135,79370 | 10,09547 |

|            |      |           |    |    |    |       |             |           |         |           |            |           |          |
|------------|------|-----------|----|----|----|-------|-------------|-----------|---------|-----------|------------|-----------|----------|
| 2014 Drome | DG14 | Vinsobres | 20 | JO | NA | forte | 87,58608059 | 243,69697 | 7,96326 | 98,20000  | 793,07948  | 141,08510 | 11,36264 |
| 2014 Drome | DG14 | Vinsobres | 20 | JO | NA | forte | 92,53205128 | 226,46061 | 5,99966 | 119,93333 | 932,94026  | 145,47248 | 10,13942 |
| 2014 Drome | DG14 | Vinsobres | 20 | JO | NA | forte | 115,3498168 | 160,69091 | 6,05357 | 99,96970  | 1196,29873 | 125,92009 | 15,60897 |
| 2014 Drome | DG14 | Vinsobres | 20 | JO | NA | forte | 108,0201465 | 189,02626 | 7,47390 | 103,30909 | 539,62448  | 148,39999 | 12,73695 |
| 2014 Drome | DG14 | Vinsobres | 20 | JO | NA | forte | 104,8946886 | 162,63030 | 6,31204 | 111,30909 | 959,60220  | 151,94980 | 14,51328 |
| 2014 Drome | DG14 | Vinsobres | 20 | JO | NA | forte | 91,5        | 158,60606 | 7,27438 | 107,77576 | 637,98977  | 140,32255 | 8,42903  |
| 2014 Drome | DG14 | Vinsobres | 20 | JO | NA | forte | 66,78296703 | 170,54545 | NA      | 105,86061 | 1118,57313 | 143,56017 | 13,09821 |
| 2014 Drome | DG14 | Vinsobres | 20 | JO | NA | forte | 77,27197802 | NA        | NA      | NA        | 809,74229  | 148,85580 | NA       |
| 2014 Drome | DG14 | Vinsobres | 5  | JO | NA | forte | 82,52289377 | 138,26263 | 6,70330 | 114,71515 | 1083,94317 | 145,93394 | 7,67995  |
| 2014 Drome | DG14 | Vinsobres | 5  | JO | NA | forte | 76,94871795 | 191,93333 | 7,52713 | 110,66667 | 1061,56289 | 145,38806 | 11,25549 |
| 2014 Drome | DG14 | Vinsobres | 5  | JO | NA | forte | 95,28663004 | 198,97778 | 7,93132 | 111,58788 | 1308,94127 | 141,40351 | 10,88416 |
| 2014 Drome | DG14 | Vinsobres | 5  | JO | NA | forte | 86,63919414 | 126,08485 | 9,01957 | 109,46061 | 1058,76492 | 142,08147 | 10,94437 |
| 2014 Drome | DG14 | Vinsobres | 5  | JO | NA | forte | 96,92216117 | 115,40000 | 7,77782 | 115,75152 | 715,01903  | 127,46158 | 6,34890  |
| 2014 Drome | DG14 | Vinsobres | 5  | JO | NA | forte | 77,14652015 | 143,50303 | 7,09112 | 113,87879 | 1223,09180 | 136,42499 | 9,41484  |
| 2014 Drome | DG14 | Vinsobres | 5  | JO | NA | forte | 104,8571429 | 138,88485 | 6,98947 | 109,83030 | 763,59734  | 140,60930 | 7,17766  |
| 2014 Drome | DG14 | Vinsobres | 5  | JO | NA | forte | 108,1950549 | 205,12323 | 8,67857 | 113,16970 | 909,80530  | 139,16207 | 9,81090  |
| 2014 Drome | DG14 | Vinsobres | 5  | JO | NA | forte | 102,1291209 | 200,21010 | NA      | 102,59394 | NA         | 143,97023 | 11,17445 |
| 2014 Drome | DG14 | Vinsobres | 5  | JO | NA | forte | 117,9020147 | 232,03636 | NA      | 119,25455 | NA         | 144,96800 | 10,25641 |
| 2014 Drome | DG14 | Vinsobres | 13 | JO | NA | forte | 113,5879121 | 214,98990 | 9,32669 | 127,53939 | 623,83423  | 148,80116 | 9,63141  |
| 2014 Drome | DG14 | Vinsobres | 13 | JO | NA | forte | 112,78663   | 214,66263 | 7,87386 | 115,60606 | 344,38260  | 156,68313 | 6,73901  |
| 2014 Drome | DG14 | Vinsobres | 13 | JO | NA | forte | 107,047619  | 204,25455 | 7,45501 | 107,50909 | 970,33367  | 139,09496 | 7,29121  |
| 2014 Drome | DG14 | Vinsobres | 13 | JO | NA | forte | 111,970696  | 135,82222 | 7,88049 | 115,56364 | 1315,47266 | 145,56417 | 4,79533  |
| 2014 Drome | DG14 | Vinsobres | 13 | JO | NA | forte | 108,9615385 | 202,74545 | 8,83173 | 116,64848 | 1178,53450 | 144,72790 | 6,58013  |
| 2014 Drome | DG14 | Vinsobres | 13 | JO | NA | forte | 97,28754579 | 129,28485 | 7,89114 | 114,12121 | 999,13067  | 140,86168 | 5,82738  |
| 2014 Drome | DG14 | Vinsobres | 13 | JO | NA | forte | 109,8818681 | 208,71515 | 8,59524 | 119,94242 | 1233,99699 | 143,45251 | 5,11332  |
| 2014 Drome | DG14 | Vinsobres | 13 | JO | NA | forte | 96,6510989  | NA        | 7,88164 | 105,80000 | 1430,77393 | 138,22200 | 5,97115  |
| 2014 Drome | DG14 | Vinsobres | 13 | JO | NA | forte | 104,3095238 | NA        | 8,59547 | 108,53333 | 1145,12821 | 140,42354 | 7,83700  |
| 2014 Drome | DG14 | Vinsobres | 13 | JO | NA | forte | 108,9056777 | NA        | 7,33482 | 100,72424 | NA         | 139,69116 | 8,30311  |
| 2014 Drome | DG14 | Vinsobres | 1  | JO | NA | forte | 131,518315  | 169,63030 | 5,67170 | 91,43030  | 1520,03196 | 99,97068  | 12,12775 |
| 2014 Drome | DG14 | Vinsobres | 1  | JO | NA | forte | 119,1062271 | 132,74343 | 6,20398 | 114,15758 | 1230,11223 | 103,26450 | 8,76282  |
| 2014 Drome | DG14 | Vinsobres | 1  | JO | NA | forte | 130,4519231 | 119,51111 | 9,76305 | 100,84848 | 1357,84901 | 100,17149 | 7,49542  |
| 2014 Drome | DG14 | Vinsobres | 1  | JO | NA | forte | 109,467033  | 154,00404 | 7,64457 | 96,26061  | 1399,50168 | 100,21505 | 5,94162  |
| 2014 Drome | DG14 | Vinsobres | 1  | JO | NA | forte | 123,8653846 | 154,12525 | 6,70696 | 99,26364  | 1368,24310 | 106,43358 | 8,74405  |
| 2014 Drome | DG14 | Vinsobres | 1  | JO | NA | forte | 124,6217949 | 246,20000 | 6,88828 | 105,15152 | 1358,89415 | 112,54364 | 14,90522 |
| 2014 Drome | DG14 | Vinsobres | 1  | JO | NA | forte | 136,9267399 | 149,58788 | 6,66999 | 101,89091 | 1707,51249 | 107,56470 | 7,16438  |
| 2014 Drome | DG14 | Vinsobres | 1  | JO | NA | forte | 126,9551282 | 151,01818 | 6,48455 | 93,66364  | NA         | 96,97163  | 12,65888 |
| 2014 Drome | DG14 | Vinsobres | 1  | JO | NA | forte | 80,87728938 | 164,77576 | NA      | 93,67879  | NA         | 99,96017  | 10,33104 |
| 2014 Drome | DG14 | Vinsobres | 1  | JO | NA | forte | 98,58608059 | 217,40606 | NA      | NA        | NA         | 112,77827 | NA       |
| 2014 Drome | DG14 | Vinsobres | 9  | JO | NA | forte | 84,73992674 | 57,64848  | 8,21635 | 109,07273 | 1639,12276 | 99,84976  | 14,87546 |
| 2014 Drome | DG14 | Vinsobres | 9  | JO | NA | forte | 142,7637363 | 120,92525 | 8,34592 | 109,78182 | 970,00757  | 108,95036 | 10,86195 |
| 2014 Drome | DG14 | Vinsobres | 9  | JO | NA | forte | 93,25457875 | 95,21212  | 8,34306 | 96,52121  | 1176,27408 | 103,54229 | 8,90842  |

|                 |      |           |       |    |        |             |           |          |           |            |           |          |
|-----------------|------|-----------|-------|----|--------|-------------|-----------|----------|-----------|------------|-----------|----------|
| 2014 Drome      | DG14 | Vinsobres | 9 JO  | NA | forte  | 91,39652015 | 131,81818 | 10,13530 | 93,73939  | 1127,35254 | 107,30838 | 8,54876  |
| 2014 Drome      | DG14 | Vinsobres | 9 JO  | NA | forte  | 97,21886447 | 136,77576 | 8,90568  | 115,98788 | 950,34424  | 97,60254  | 8,35623  |
| 2014 Drome      | DG14 | Vinsobres | 9 JO  | NA | forte  | 98,74358974 | 183,23232 | 8,71188  | 103,21818 | 835,55424  | 105,79282 | 10,38965 |
| 2014 Drome      | DG14 | Vinsobres | 9 JO  | NA | forte  | 135,6840659 | 200,07273 | 7,76236  | 106,56970 | NA         | 107,52153 | 10,66529 |
| 2014 Drome      | DG14 | Vinsobres | 9 JO  | NA | forte  | 135,3269231 | 173,86061 | 8,38965  | 99,69091  | NA         | 109,08250 | 9,46703  |
| 2014 Drome      | DG14 | Vinsobres | 9 JO  | NA | forte  | 149,8461538 | 154,82020 | NA       | 112,21212 | NA         | 103,07835 | 8,68956  |
| 2014 Drome      | DG14 | Vinsobres | 9 JO  | NA | forte  | 126,0906593 | NA        | NA       | 109,23030 | NA         | 103,60292 | 9,40751  |
| 2014 LureAlbion | LK14 | StTrinit  | 23 JO | NA | faible | 120,728022  | 139,50303 | 7,27610  | 98,85455  | 1196,21265 | 102,96200 | 12,04075 |
| 2014 LureAlbion | LK14 | StTrinit  | 23 JO | NA | faible | 125,0851648 | 166,89293 | 6,49794  | 99,15152  | 1267,12400 | 106,28583 | 13,69734 |
| 2014 LureAlbion | LK14 | StTrinit  | 23 JO | NA | faible | 128,5897436 | 139,06667 | 6,61973  | 109,69091 | 1297,70776 | 103,26415 | 19,79121 |
| 2014 LureAlbion | LK14 | StTrinit  | 23 JO | NA | faible | 117,6684982 | 142,03232 | 6,86149  | 99,47879  | 1704,58925 | 107,40161 | 15,14927 |
| 2014 LureAlbion | LK14 | StTrinit  | 23 JO | NA | faible | 109,8919414 | 82,96970  | 6,96051  | 91,62424  | 1067,06058 | 105,05795 | 14,70009 |
| 2014 LureAlbion | LK14 | StTrinit  | 23 JO | NA | faible | 126,9386447 | 143,42626 | 6,54121  | 95,25455  | 405,26157  | 108,91251 | 12,82418 |
| 2014 LureAlbion | LK14 | StTrinit  | 23 JO | NA | faible | 110,2225275 | 71,70909  | 7,72630  | 102,01818 | 1403,47035 | 99,88775  | 13,81136 |
| 2014 LureAlbion | LK14 | StTrinit  | 23 JO | NA | faible | 109,0677656 | 103,05455 | 6,30323  | 83,97273  | 1222,80491 | 96,30053  | 15,99863 |
| 2014 LureAlbion | LK14 | StTrinit  | 23 JO | NA | faible | 127,1886447 | 93,53333  | 6,70284  | 88,67273  | 601,84191  | 98,78704  | 16,56227 |
| 2014 LureAlbion | LK14 | StTrinit  | 23 JO | NA | faible | 118,1346154 | 125,04646 | NA       | 84,58182  | NA         | 104,15399 | 16,08883 |
| 2014 LureAlbion | LK14 | StTrinit  | 21 JO | NA | faible | 114,4697802 | 90,16970  | 7,43590  | 94,60606  | 1261,10831 | 115,71984 | 11,94025 |
| 2014 LureAlbion | LK14 | StTrinit  | 21 JO | NA | faible | 115,9047619 | 137,71515 | 6,11332  | 91,71515  | 1470,66309 | 121,00836 | 16,90385 |
| 2014 LureAlbion | LK14 | StTrinit  | 21 JO | NA | faible | 130,9038462 | 130,35960 | 6,71085  | 94,43030  | 1283,95322 | 125,64017 | 18,26786 |
| 2014 LureAlbion | LK14 | StTrinit  | 21 JO | NA | faible | 116,739011  | 151,91919 | 6,13416  | 98,13939  | 1094,42158 | 123,21145 | 17,57234 |
| 2014 LureAlbion | LK14 | StTrinit  | 21 JO | NA | faible | 134,4990842 | 140,06667 | 5,64938  | 93,52121  | 1596,53059 | 122,10674 | 14,18887 |
| 2014 LureAlbion | LK14 | StTrinit  | 21 JO | NA | faible | 113,7564103 | 156,01616 | 7,19895  | 100,83333 | 1016,44134 | 120,47770 | 14,62912 |
| 2014 LureAlbion | LK14 | StTrinit  | 21 JO | NA | faible | 116,4020147 | 118,15758 | 5,82715  | 88,79697  | 1179,20342 | 111,13820 | 12,83333 |
| 2014 LureAlbion | LK14 | StTrinit  | 21 JO | NA | faible | 106,3434066 | 151,40000 | 6,42537  | 97,44242  | 1252,76935 | 124,33063 | 19,13004 |
| 2014 LureAlbion | LK14 | StTrinit  | 21 JO | NA | faible | 128,5815018 | NA        | 6,88290  | 102,40606 | NA         | 120,80782 | 14,75000 |
| 2014 LureAlbion | LK14 | StTrinit  | 21 JO | NA | faible | 88,33516484 | NA        | NA       | 86,93333  | NA         | 113,87580 | 12,57486 |
| 2014 LureAlbion | LK14 | StTrinit  | 1 JO  | NA | faible | 71,09615385 | 121,53939 | 5,14973  | 93,60606  | 1157,99059 | 117,75034 | 10,35760 |
| 2014 LureAlbion | LK14 | StTrinit  | 1 JO  | NA | faible | 69,68040293 | 119,44242 | 4,94139  | 93,64848  | 614,94978  | 124,35975 | 13,87729 |
| 2014 LureAlbion | LK14 | StTrinit  | 1 JO  | NA | faible | 70,51190476 | 75,09091  | 4,57830  | 91,99697  | 1505,35309 | 113,41406 | 11,91529 |
| 2014 LureAlbion | LK14 | StTrinit  | 1 JO  | NA | faible | 79,83150183 | 116,75758 | 5,82853  | 90,75152  | 1650,34271 | 114,52758 | 14,52129 |
| 2014 LureAlbion | LK14 | StTrinit  | 1 JO  | NA | faible | 71,68589744 | 78,84848  | 6,84032  | 89,65455  | 1833,69787 | 124,98620 | 11,07830 |
| 2014 LureAlbion | LK14 | StTrinit  | 1 JO  | NA | faible | 74,83791209 | 133,95758 | NA       | 93,22424  | 2019,45267 | 122,32434 | 19,07463 |
| 2014 LureAlbion | LK14 | StTrinit  | 1 JO  | NA | faible | 99,98351648 | NA        | NA       | 93,57576  | 1213,15193 | 113,91111 | 9,25641  |
| 2014 LureAlbion | LK14 | StTrinit  | 1 JO  | NA | faible | 103,1501832 | NA        | NA       | 95,05455  | 1335,57717 | 116,73618 | 12,52473 |
| 2014 LureAlbion | LK14 | StTrinit  | 1 JO  | NA | faible | 95,44413919 | NA        | NA       | 97,49091  | 1424,58333 | 112,01382 | 10,09890 |
| 2014 LureAlbion | LK14 | StTrinit  | 1 JO  | NA | faible | 119,0485348 | NA        | NA       | 104,75758 | 1429,70478 | 118,49423 | 11,82555 |
| 2014 LureAlbion | LK14 | StTrinit  | 15 JO | NA | faible | 104,7948718 | 156,17576 | 6,60279  | 103,96970 | 449,02653  | 112,30192 | 10,30907 |
| 2014 LureAlbion | LK14 | StTrinit  | 15 JO | NA | faible | 112,2820513 | 146,95758 | 5,58631  | 101,00000 | 1211,69511 | 125,20377 | 8,88965  |
| 2014 LureAlbion | LK14 | StTrinit  | 15 JO | NA | faible | 111,1208791 | 98,07273  | 5,85508  | 92,31515  | 1711,49965 | 120,72321 | 15,34524 |
| 2014 LureAlbion | LK14 | StTrinit  | 15 JO | NA | faible | 108,209707  | 107,29697 | 6,67960  | 96,67879  | 801,22628  | 127,75878 | 11,74267 |

|      |            |      |          |    |    |    |        |             |           |         |           |            |           |          |
|------|------------|------|----------|----|----|----|--------|-------------|-----------|---------|-----------|------------|-----------|----------|
| 2014 | LureAlbion | LK14 | StTrinit | 15 | JO | NA | faible | 129,7774725 | 86,87273  | 6,63118 | 97,73939  | 1183,94094 | 124,07525 | 13,21612 |
| 2014 | LureAlbion | LK14 | StTrinit | 15 | JO | NA | faible | 107,0338828 | NA        | 6,36985 | 99,51515  | 891,81191  | 113,12782 | 7,13049  |
| 2014 | LureAlbion | LK14 | StTrinit | 15 | JO | NA | faible | 104,8021978 | NA        | 6,94071 | 98,63030  | 726,68251  | 118,93014 | 11,53388 |
| 2014 | LureAlbion | LK14 | StTrinit | 15 | JO | NA | faible | 104,5       | NA        | 6,54739 | 100,86061 | 814,65059  | 118,30567 | 9,85027  |
| 2014 | LureAlbion | LK14 | StTrinit | 15 | JO | NA | faible | 116,1410256 | NA        | 6,39240 | 97,66667  | 1142,05203 | 125,65207 | 10,17262 |
| 2014 | LureAlbion | LK14 | StTrinit | 15 | JO | NA | faible | 106,5531136 | NA        | NA      | 92,47273  | NA         | 127,78238 | 13,25962 |
| 2014 | LureAlbion | LK14 | StTrinit | 12 | JO | NA | faible | 106,0934066 | 105,47071 | 6,34409 | 84,71818  | 1010,93396 | 126,90705 | 14,77152 |
| 2014 | LureAlbion | LK14 | StTrinit | 12 | JO | NA | faible | 107,1419414 | 139,89495 | 6,46474 | 82,83636  | 822,13264  | 127,32472 | 16,58700 |
| 2014 | LureAlbion | LK14 | StTrinit | 12 | JO | NA | faible | 98,37454212 | 79,37576  | 6,32418 | 92,39091  | 927,24501  | 136,21069 | 12,22665 |
| 2014 | LureAlbion | LK14 | StTrinit | 12 | JO | NA | faible | 109,1941392 | 74,84242  | 6,76213 | 86,95455  | 1171,80394 | 136,27407 | 14,09295 |
| 2014 | LureAlbion | LK14 | StTrinit | 12 | JO | NA | faible | 108,4514652 | 70,83636  | 6,97012 | 83,68485  | 686,80279  | 136,82230 | 13,46520 |
| 2014 | LureAlbion | LK14 | StTrinit | 12 | JO | NA | faible | 104,8937729 | 100,38182 | 6,86378 | 77,70909  | 1468,45396 | 132,15881 | 15,19597 |
| 2014 | LureAlbion | LK14 | StTrinit | 12 | JO | NA | faible | 114,8031136 | 87,18182  | 6,72390 | 90,89697  | 1675,92427 | 136,78001 | 19,67788 |
| 2014 | LureAlbion | LK14 | StTrinit | 12 | JO | NA | faible | 94,14697802 | 114,70909 | 6,92170 | 90,80000  | 1818,17887 | 138,51754 | 15,99176 |
| 2014 | LureAlbion | LK14 | StTrinit | 12 | JO | NA | faible | 97,37728938 | 102,67273 | NA      | 84,52121  | NA         | 132,45146 | 15,35302 |
| 2014 | LureAlbion | LK14 | StTrinit | 12 | JO | NA | faible | 72,21794872 | NA        | NA      | 86,11818  | NA         | 126,78265 | 13,73535 |
| 2014 | LureAlbion | LK14 | StTrinit | 22 | JO | NA | forte  | 98,81730769 | 156,65051 | 6,43956 | 84,40606  | 1104,56102 | 122,50510 | 9,88462  |
| 2014 | LureAlbion | LK14 | StTrinit | 22 | JO | NA | forte  | 80,34249084 | 119,66465 | 5,89183 | 74,83636  | 1691,64743 | 122,92409 | 14,62088 |
| 2014 | LureAlbion | LK14 | StTrinit | 22 | JO | NA | forte  | 127,8214286 | 150,32121 | 6,42720 | 86,70303  | 1651,35648 | 127,29563 | 14,57601 |
| 2014 | LureAlbion | LK14 | StTrinit | 22 | JO | NA | forte  | 107,8974359 | 112,00404 | 6,43029 | 77,26364  | 602,09507  | 124,24620 | 14,16163 |
| 2014 | LureAlbion | LK14 | StTrinit | 22 | JO | NA | forte  | 81,47710623 | 107,00606 | 5,11172 | 83,25455  | 2191,37186 | 129,49188 | 13,04808 |
| 2014 | LureAlbion | LK14 | StTrinit | 22 | JO | NA | forte  | 72,21978022 | 96,59394  | NA      | 89,53939  | 1041,16517 | 125,20256 | 12,91117 |
| 2014 | LureAlbion | LK14 | StTrinit | 22 | JO | NA | forte  | 98,50732601 | 114,48485 | NA      | 79,64545  | 903,85813  | 114,86156 | 11,60440 |
| 2014 | LureAlbion | LK14 | StTrinit | 22 | JO | NA | forte  | 114,9203297 | 161,40000 | NA      | 91,67273  | 1136,13847 | 127,56905 | 11,69299 |
| 2014 | LureAlbion | LK14 | StTrinit | 22 | JO | NA | forte  | 118,4496337 | 143,71717 | NA      | 80,06061  | 937,31273  | 128,52184 | 13,42033 |
| 2014 | LureAlbion | LK14 | StTrinit | 22 | JO | NA | forte  | 121,7380952 | 160,26667 | NA      | 85,34545  | NA         | 116,88959 | 14,53480 |
| 2014 | LureAlbion | LK14 | StTrinit | 5  | JO | NA | forte  | 132,4981685 | 146,55354 | 6,76786 | 91,68485  | 1036,68305 | 129,87161 | 11,02793 |
| 2014 | LureAlbion | LK14 | StTrinit | 5  | JO | NA | forte  | 115,5677656 | 163,87879 | 6,74176 | 83,54545  | 801,81289  | 131,90256 | 8,99588  |
| 2014 | LureAlbion | LK14 | StTrinit | 5  | JO | NA | forte  | 122,9258242 | 118,03636 | 6,17147 | 97,64242  | 1114,79734 | 129,91191 | 12,43773 |
| 2014 | LureAlbion | LK14 | StTrinit | 5  | JO | NA | forte  | 109,6227106 | 66,90909  | 6,80014 | 96,54545  | 1364,59578 | 126,48701 | 16,18315 |
| 2014 | LureAlbion | LK14 | StTrinit | 5  | JO | NA | forte  | 108,6217949 | 121,12727 | 5,97734 | 95,65455  | 1014,62586 | 120,24058 | 13,72940 |
| 2014 | LureAlbion | LK14 | StTrinit | 5  | JO | NA | forte  | 73,82967033 | 97,50303  | 7,02266 | 67,72727  | 628,29911  | 126,83435 | 13,41255 |
| 2014 | LureAlbion | LK14 | StTrinit | 5  | JO | NA | forte  | 108,8076923 | 136,21818 | 7,86905 | 93,35152  | 1059,53073 | 125,15710 | 10,49313 |
| 2014 | LureAlbion | LK14 | StTrinit | 5  | JO | NA | forte  | 121,7335165 | 69,24848  | NA      | 81,18182  | 763,28333  | 123,03785 | 12,53755 |
| 2014 | LureAlbion | LK14 | StTrinit | 5  | JO | NA | forte  | 113,2930403 | 86,61818  | NA      | 92,01818  | 1704,47942 | 123,39863 | 13,75321 |
| 2014 | LureAlbion | LK14 | StTrinit | 5  | JO | NA | forte  | 114,1025641 | NA        | NA      | 92,80606  | NA         | 121,67591 | 14,61264 |
| 2014 | LureAlbion | LK14 | StTrinit | 9  | JO | NA | forte  | 107,0860806 | 98,16970  | 6,29121 | 93,23636  | 1509,68383 | 97,44439  | 20,60485 |
| 2014 | LureAlbion | LK14 | StTrinit | 9  | JO | NA | forte  | 119,4386447 | 98,22222  | 6,54762 | 92,67576  | 1061,42360 | 99,83343  | 15,91003 |
| 2014 | LureAlbion | LK14 | StTrinit | 9  | JO | NA | forte  | 153,1309524 | 123,83434 | 5,77839 | 93,41212  | 1012,29194 | 105,00842 | 12,28114 |
| 2014 | LureAlbion | LK14 | StTrinit | 9  | JO | NA | forte  | 110,4468864 | 131,34545 | 6,09295 | 94,52121  | 642,46721  | 111,01876 | 11,67628 |
| 2014 | LureAlbion | LK14 | StTrinit | 9  | JO | NA | forte  | 102,8598901 | 135,51919 | 5,22253 | 89,27879  | 1251,45881 | 112,96766 | 13,81799 |

|      |            |      |          |    |    |    |        |             |           |         |           |            |           |          |
|------|------------|------|----------|----|----|----|--------|-------------|-----------|---------|-----------|------------|-----------|----------|
| 2014 | LureAlbion | LK14 | StTrinit | 9  | JO | NA | forte  | 119,6868132 | 180,96970 | 5,40865 | 83,75758  | 1481,14852 | 104,55663 | 11,62088 |
| 2014 | LureAlbion | LK14 | StTrinit | 9  | JO | NA | forte  | 116,7802198 | 138,07879 | 6,22962 | 92,88485  | 1112,27609 | 110,73629 | 14,63233 |
| 2014 | LureAlbion | LK14 | StTrinit | 9  | JO | NA | forte  | 119,4304029 | 178,75556 | 5,91415 | 91,72121  | 1171,44399 | 110,29477 | 16,41758 |
| 2014 | LureAlbion | LK14 | StTrinit | 9  | JO | NA | forte  | 118,9102564 | 181,89091 | 6,67743 | 94,55758  | NA         | 107,34260 | 16,38233 |
| 2014 | LureAlbion | LK14 | StTrinit | 9  | JO | NA | forte  | 114,0677656 | 181,50303 | NA      | 100,45758 | NA         | 105,42313 | 16,24038 |
| 2014 | LureAlbion | LK14 | StTrinit | 18 | JO | NA | forte  | 92,06410256 | 189,39798 | 5,88977 | 95,63030  | 1542,89675 | 95,58582  | 10,19231 |
| 2014 | LureAlbion | LK14 | StTrinit | 18 | JO | NA | forte  | 142,6932234 | 171,81414 | 6,93304 | 100,50303 | 1278,33995 | 101,01849 | 11,67445 |
| 2014 | LureAlbion | LK14 | StTrinit | 18 | JO | NA | forte  | 141,78663   | 136,06465 | 6,35348 | 94,63636  | 1225,82787 | 99,82488  | 9,67376  |
| 2014 | LureAlbion | LK14 | StTrinit | 18 | JO | NA | forte  | 122,4542125 | 158,75758 | 7,26236 | 95,83030  | 1578,44710 | 105,33635 | 14,11126 |
| 2014 | LureAlbion | LK14 | StTrinit | 18 | JO | NA | forte  | 137,4029304 | 111,40606 | 7,28594 | 97,76970  | 947,76204  | 98,64727  | 11,96429 |
| 2014 | LureAlbion | LK14 | StTrinit | 18 | JO | NA | forte  | 100,0998168 | 191,24444 | 6,83471 | 93,35758  | 1710,10065 | 98,00489  | 12,20810 |
| 2014 | LureAlbion | LK14 | StTrinit | 18 | JO | NA | forte  | 121,9459707 | 198,82020 | 7,62202 | 95,49697  | 1487,02286 | 99,25164  | 15,66667 |
| 2014 | LureAlbion | LK14 | StTrinit | 18 | JO | NA | forte  | 134,8745421 | 221,29293 | 6,23077 | 93,33939  | 1418,53727 | 97,39615  | 13,86493 |
| 2014 | LureAlbion | LK14 | StTrinit | 18 | JO | NA | forte  | 136,0320513 | 201,62020 | 8,10440 | 100,20000 | 1425,67841 | 109,37681 | 13,61951 |
| 2014 | LureAlbion | LK14 | StTrinit | 18 | JO | NA | forte  | 156,6208791 | NA        | 6,42548 | 95,73939  | NA         | 102,20271 | 11,18315 |
| 2014 | LureAlbion | LK14 | StTrinit | 7  | JO | NA | forte  | 121,3186813 | 68,26667  | 7,41896 | 96,93939  | 1744,30975 | 108,97929 | 14,82418 |
| 2014 | LureAlbion | LK14 | StTrinit | 7  | JO | NA | forte  | 109,8827839 | 115,81818 | 6,53812 | 96,19394  | 1248,31953 | 105,32807 | 14,35783 |
| 2014 | LureAlbion | LK14 | StTrinit | 7  | JO | NA | forte  | 111,4075092 | 137,69697 | 6,93922 | 95,09091  | 945,33776  | 105,60966 | 11,25137 |
| 2014 | LureAlbion | LK14 | StTrinit | 7  | JO | NA | forte  | 121,3479853 | 117,80606 | 6,64732 | 94,71212  | 1256,33494 | 103,41052 | 14,25092 |
| 2014 | LureAlbion | LK14 | StTrinit | 7  | JO | NA | forte  | 134,8891941 | 133,40606 | 6,18636 | 98,52121  | 486,68765  | 95,26167  | 11,44460 |
| 2014 | LureAlbion | LK14 | StTrinit | 7  | JO | NA | forte  | 116,1684982 | 117,70505 | 6,71532 | 98,18485  | 755,99029  | 102,32381 | 13,21429 |
| 2014 | LureAlbion | LK14 | StTrinit | 7  | JO | NA | forte  | 139,771978  | 109,14343 | 7,33516 | 98,67273  | 694,57861  | 103,17073 | 11,16163 |
| 2014 | LureAlbion | LK14 | StTrinit | 7  | JO | NA | forte  | 122,6208791 | 137,32121 | 6,20284 | 97,58182  | 1163,04711 | 101,04037 | 11,72756 |
| 2014 | LureAlbion | LK14 | StTrinit | 7  | JO | NA | forte  | 118,6309524 | 138,78788 | 6,75069 | 91,46061  | 1092,74425 | 98,32454  | 17,21383 |
| 2014 | LureAlbion | LK14 | StTrinit | 7  | JO | NA | forte  | 123,2481685 | 122,91515 | NA      | 95,20606  | 1320,76863 | 101,66662 | NA       |
| 2014 | LureAlbion | LZ14 | Banon    | 5  | JO | NA | faible | 88,29487179 | 172,40606 | 7,31777 | 86,03636  | 1092,45317 | 138,63687 | 17,09432 |
| 2014 | LureAlbion | LZ14 | Banon    | 5  | JO | NA | faible | 99,7032967  | 186,88889 | 5,93132 | 74,04242  | 795,80387  | 131,63474 | 16,31227 |
| 2014 | LureAlbion | LZ14 | Banon    | 5  | JO | NA | faible | 104,9184982 | 172,75556 | 6,42056 | 83,18788  | 584,45405  | 151,07217 | 14,31090 |
| 2014 | LureAlbion | LZ14 | Banon    | 5  | JO | NA | faible | 96,31684982 | 157,97980 | 7,57109 | 88,00000  | 975,35169  | 138,18458 | 9,94689  |
| 2014 | LureAlbion | LZ14 | Banon    | 5  | JO | NA | faible | 102,1529304 | 101,18384 | 9,40179 | 100,84848 | 863,99175  | 135,51127 | 15,67995 |
| 2014 | LureAlbion | LZ14 | Banon    | 5  | JO | NA | faible | 91,11080586 | 110,84242 | 8,43269 | 93,09394  | 768,79505  | 133,19722 | 10,63118 |
| 2014 | LureAlbion | LZ14 | Banon    | 5  | JO | NA | faible | 99,41391941 | 189,18384 | 6,98523 | 83,90909  | 1108,11355 | 147,27680 | 14,32005 |
| 2014 | LureAlbion | LZ14 | Banon    | 5  | JO | NA | faible | 100,5915751 | 236,27879 | 7,50687 | 91,70303  | 733,88948  | 138,50789 | 13,65476 |
| 2014 | LureAlbion | LZ14 | Banon    | 5  | JO | NA | faible | 71,53479853 | 186,44848 | 7,64560 | 93,07273  | 1015,26955 | 147,66674 | 15,34432 |
| 2014 | LureAlbion | LZ14 | Banon    | 5  | JO | NA | faible | 73,23168498 | NA        | NA      | 90,13939  | NA         | 138,49554 | NA       |
| 2014 | LureAlbion | LZ14 | Banon    | 3  | JO | NA | faible | 48,03296703 | 134,75152 | 5,78984 | 86,60606  | 1349,17659 | 143,36503 | 14,48077 |
| 2014 | LureAlbion | LZ14 | Banon    | 3  | JO | NA | faible | 75,29395604 | 279,82626 | 5,89560 | 92,10303  | 545,37019  | 140,85319 | 13,09753 |
| 2014 | LureAlbion | LZ14 | Banon    | 3  | JO | NA | faible | 64,75641026 | 168,37980 | 6,24451 | 80,43030  | 526,86394  | 140,15446 | 12,44872 |
| 2014 | LureAlbion | LZ14 | Banon    | 3  | JO | NA | faible | 86,97435897 | 106,36768 | 7,53468 | 87,43030  | 777,46258  | 129,65084 | 11,90980 |
| 2014 | LureAlbion | LZ14 | Banon    | 3  | JO | NA | faible | 86,23260073 | 191,96364 | 8,62569 | 94,20606  | 851,97846  | 144,37321 | 19,67720 |
| 2014 | LureAlbion | LZ14 | Banon    | 3  | JO | NA | faible | 66,12087912 | 188,46667 | 7,20261 | 84,30909  | 236,65803  | 136,79505 | 14,22184 |

|      |            |      |       |    |    |    |        |             |           |         |           |            |           |          |
|------|------------|------|-------|----|----|----|--------|-------------|-----------|---------|-----------|------------|-----------|----------|
| 2014 | LureAlbion | LZ14 | Banon | 3  | JO | NA | faible | 86,43040293 | 106,54949 | 7,76305 | 92,53333  | 835,82082  | 131,04202 | 10,77152 |
| 2014 | LureAlbion | LZ14 | Banon | 3  | JO | NA | faible | 102,228022  | 94,64848  | NA      | 90,07879  | 699,35602  | 134,27023 | 14,11722 |
| 2014 | LureAlbion | LZ14 | Banon | 3  | JO | NA | faible | 91,49358974 | 133,27273 | NA      | 94,96970  | 873,50422  | 149,44442 | 13,80082 |
| 2014 | LureAlbion | LZ14 | Banon | 3  | JO | NA | faible | 99,03663004 | NA        | NA      | 86,76364  | NA         | 138,65123 | 13,18178 |
| 2014 | LureAlbion | LZ14 | Banon | 20 | JO | NA | faible | 92,22344322 | 151,45051 | 6,10543 | 93,06061  | 936,07587  | 133,70045 | 13,94643 |
| 2014 | LureAlbion | LZ14 | Banon | 20 | JO | NA | faible | 95,55769231 | 228,58788 | 6,98455 | 86,38788  | 744,76735  | 143,42748 | 17,33150 |
| 2014 | LureAlbion | LZ14 | Banon | 20 | JO | NA | faible | 113,5137363 | 278,25455 | 6,16850 | 84,06667  | 799,86692  | 142,25386 | 14,44574 |
| 2014 | LureAlbion | LZ14 | Banon | 20 | JO | NA | faible | 86,50824176 | 166,84848 | 7,91690 | 87,04242  | 1267,56549 | 135,62715 | 14,52610 |
| 2014 | LureAlbion | LZ14 | Banon | 20 | JO | NA | faible | 87,17582418 | 189,01818 | 5,72974 | 85,41818  | 1178,76898 | 132,27896 | 14,70101 |
| 2014 | LureAlbion | LZ14 | Banon | 20 | JO | NA | faible | 98,42582418 | 195,30101 | 7,93750 | 87,86061  | 457,23498  | 142,17374 | 11,04945 |
| 2014 | LureAlbion | LZ14 | Banon | 20 | JO | NA | faible | 101,478022  | 163,01414 | 7,22779 | 86,29697  | NA         | 142,57693 | 19,71841 |
| 2014 | LureAlbion | LZ14 | Banon | 20 | JO | NA | faible | 102,1703297 | 199,40606 | 8,51374 | 89,92727  | NA         | 127,07330 | 10,28114 |
| 2014 | LureAlbion | LZ14 | Banon | 20 | JO | NA | faible | 92,42307692 | 208,58182 | NA      | 96,49091  | NA         | 138,26525 | 16,48123 |
| 2014 | LureAlbion | LZ14 | Banon | 20 | JO | NA | faible | 87,26007326 | 129,93939 | NA      | 85,10000  | NA         | NA        | 11,71749 |
| 2014 | LureAlbion | LZ14 | Banon | 6  | JO | NA | faible | 104,4139194 | 92,41616  | 7,42125 | 101,24242 | 602,14678  | 148,15072 | 16,31227 |
| 2014 | LureAlbion | LZ14 | Banon | 6  | JO | NA | faible | 120,010989  | 224,28687 | 5,68510 | 95,26061  | 868,46698  | 143,00575 | 10,20696 |
| 2014 | LureAlbion | LZ14 | Banon | 6  | JO | NA | faible | 118,6630037 | 72,56364  | 6,36493 | 92,30000  | 574,45026  | 168,92525 | 13,26190 |
| 2014 | LureAlbion | LZ14 | Banon | 6  | JO | NA | faible | 165,1025641 | 207,85455 | 6,38416 | 83,07273  | 712,84144  | 172,62165 | 12,42399 |
| 2014 | LureAlbion | LZ14 | Banon | 6  | JO | NA | faible | 104,4734432 | 99,82424  | 6,21429 | 101,23636 | 417,08371  | 155,19267 | 13,77610 |
| 2014 | LureAlbion | LZ14 | Banon | 6  | JO | NA | faible | 104,9835165 | 155,75758 | 6,11779 | 101,71515 | 724,06758  | 154,15772 | 14,63736 |
| 2014 | LureAlbion | LZ14 | Banon | 6  | JO | NA | faible | 123,5686813 | 153,72121 | 6,48146 | 86,16970  | NA         | 169,35379 | 13,87179 |
| 2014 | LureAlbion | LZ14 | Banon | 6  | JO | NA | faible | 113,6520147 | 143,14343 | 6,86058 | 88,70909  | NA         | 163,96508 | 12,57830 |
| 2014 | LureAlbion | LZ14 | Banon | 6  | JO | NA | faible | 79,87545788 | NA        | NA      | NA        | NA         | 148,36374 | 13,17720 |
| 2014 | LureAlbion | LZ14 | Banon | 6  | JO | NA | faible | 90,03663004 | NA        | NA      | NA        | NA         | 172,28213 | NA       |
| 2014 | LureAlbion | LZ14 | Banon | 17 | JO | NA | faible | 118,6538462 | 76,45455  | 7,68475 | 99,76970  | 387,60176  | 151,86572 | 13,30266 |
| 2014 | LureAlbion | LZ14 | Banon | 17 | JO | NA | faible | 113,5228938 | 94,34747  | 7,66243 | 102,84242 | 913,32214  | 156,18457 | 13,61058 |
| 2014 | LureAlbion | LZ14 | Banon | 17 | JO | NA | faible | 108,8580586 | 116,88889 | 6,43017 | 97,38182  | 1066,84091 | 171,09507 | 16,08059 |
| 2014 | LureAlbion | LZ14 | Banon | 17 | JO | NA | faible | 80,81501832 | 154,49697 | 7,22505 | 85,16364  | 655,44390  | 159,40917 | 18,82326 |
| 2014 | LureAlbion | LZ14 | Banon | 17 | JO | NA | faible | 106,1089744 | 164,20606 | 6,87317 | 103,52727 | 498,14687  | 178,66757 | 15,14080 |
| 2014 | LureAlbion | LZ14 | Banon | 17 | JO | NA | faible | 89,13644689 | 255,78788 | 5,77679 | 90,75455  | 659,53946  | 164,92728 | 14,11355 |
| 2014 | LureAlbion | LZ14 | Banon | 17 | JO | NA | faible | 134,7957875 | 166,97576 | 6,41117 | 93,73939  | 1545,33809 | 154,38216 | 13,07143 |
| 2014 | LureAlbion | LZ14 | Banon | 17 | JO | NA | faible | 127,4010989 | 212,00000 | 6,98352 | 82,58182  | 1481,21421 | 145,86614 | 16,04991 |
| 2014 | LureAlbion | LZ14 | Banon | 17 | JO | NA | faible | 118,3653846 | 180,91717 | NA      | 93,56970  | 1088,82487 | 159,81482 | 19,89560 |
| 2014 | LureAlbion | LZ14 | Banon | 17 | JO | NA | faible | 120,1565934 | 186,10303 | NA      | 99,69697  | NA         | 161,19471 | 20,04670 |
| 2014 | LureAlbion | LZ14 | Banon | 11 | JO | NA | forte  | 125,3241758 | 116,14545 | 6,40133 | 84,95152  | 1686,07851 | 166,36573 | 11,88828 |
| 2014 | LureAlbion | LZ14 | Banon | 11 | JO | NA | forte  | 119,9844322 | 124,82424 | 5,82589 | 81,91515  | 647,51402  | 160,59992 | 10,10508 |
| 2014 | LureAlbion | LZ14 | Banon | 11 | JO | NA | forte  | 108,3956044 | 125,92727 | 7,20971 | 103,65455 | 1154,26761 | 179,22840 | 11,02930 |
| 2014 | LureAlbion | LZ14 | Banon | 11 | JO | NA | forte  | 104,9056777 | 130,46061 | 6,95078 | 97,09091  | 901,33483  | 153,05964 | 11,95421 |
| 2014 | LureAlbion | LZ14 | Banon | 11 | JO | NA | forte  | 109,1108059 | 178,65455 | 7,20879 | 93,25455  | 853,77655  | 156,47796 | 10,65018 |
| 2014 | LureAlbion | LZ14 | Banon | 11 | JO | NA | forte  | 97,61813187 | 182,95354 | 7,11230 | 90,94545  | 695,73030  | 177,53062 | 6,95238  |
| 2014 | LureAlbion | LZ14 | Banon | 11 | JO | NA | forte  | 116,4789377 | 101,46667 | 7,36058 | 97,70909  | 688,80010  | 163,23925 | 8,08516  |

|      |            |      |       |    |    |    |       |             |           |         |           |            |           |          |
|------|------------|------|-------|----|----|----|-------|-------------|-----------|---------|-----------|------------|-----------|----------|
| 2014 | LureAlbion | LZ14 | Banon | 11 | JO | NA | forte | 102,3031136 | NA        | 6,12477 | 84,81818  | NA         | 150,99802 | 7,75137  |
| 2014 | LureAlbion | LZ14 | Banon | 11 | JO | NA | forte | 101,6327839 | NA        | 5,79121 | 70,80606  | NA         | 159,03037 | 6,73397  |
| 2014 | LureAlbion | LZ14 | Banon | 11 | JO | NA | forte | 108,2619048 | NA        | 7,35875 | 81,65455  | NA         | 154,73898 | 12,13187 |
| 2014 | LureAlbion | LZ14 | Banon | 8  | JO | NA | forte | 112,6987179 | 179,47879 | 6,23558 | 94,31515  | 540,54005  | 111,79842 | 16,91163 |
| 2014 | LureAlbion | LZ14 | Banon | 8  | JO | NA | forte | 119,7142857 | 174,64646 | 6,09747 | 98,94545  | 1014,99165 | 109,91831 | 11,90041 |
| 2014 | LureAlbion | LZ14 | Banon | 8  | JO | NA | forte | 115,0430403 | 113,53939 | 5,62292 | 98,73939  | 411,12226  | 107,73260 | 14,08150 |
| 2014 | LureAlbion | LZ14 | Banon | 8  | JO | NA | forte | 106,7326007 | 199,13131 | 6,36457 | 98,75758  | 570,04621  | 108,55195 | 13,74405 |
| 2014 | LureAlbion | LZ14 | Banon | 8  | JO | NA | forte | 102,3571429 | 70,88485  | 5,31178 | 98,23030  | 1135,43672 | 113,56926 | 15,44826 |
| 2014 | LureAlbion | LZ14 | Banon | 8  | JO | NA | forte | 101,5173993 | 167,75354 | 6,40516 | 97,29394  | 807,82557  | 105,96547 | 12,97344 |
| 2014 | LureAlbion | LZ14 | Banon | 8  | JO | NA | forte | 100,0567766 | 95,58788  | 7,04024 | 102,74545 | 494,05686  | 115,43636 | 14,37729 |
| 2014 | LureAlbion | LZ14 | Banon | 8  | JO | NA | forte | 104,0018315 | 62,60000  | 6,39723 | 103,20303 | NA         | 112,79667 | 12,00321 |
| 2014 | LureAlbion | LZ14 | Banon | 8  | JO | NA | forte | 77,28479853 | 120,83030 | NA      | 105,91515 | NA         | 111,14221 | 10,52541 |
| 2014 | LureAlbion | LZ14 | Banon | 8  | JO | NA | forte | 64,51190476 | 151,30909 | NA      | NA        | NA         | 107,45357 | NA       |
| 2014 | LureAlbion | LZ14 | Banon | 1  | JO | NA | forte | 52,00686813 | 65,44242  | 5,05719 | 89,10303  | 854,41288  | 121,97191 | 14,25458 |
| 2014 | LureAlbion | LZ14 | Banon | 1  | JO | NA | forte | 106,242674  | 60,16970  | 6,33197 | 100,86667 | 612,20750  | 125,24296 | 16,77060 |
| 2014 | LureAlbion | LZ14 | Banon | 1  | JO | NA | forte | 80,17490842 | 170,63636 | 5,80150 | 105,13333 | 911,20935  | 119,96165 | 17,11882 |
| 2014 | LureAlbion | LZ14 | Banon | 1  | JO | NA | forte | 80,0503663  | 133,96970 | 6,75004 | 104,39394 | 582,06353  | 117,98342 | 10,04670 |
| 2014 | LureAlbion | LZ14 | Banon | 1  | JO | NA | forte | 82,61721612 | 158,98788 | 5,69665 | 99,67576  | 945,42827  | 115,95194 | 17,07326 |
| 2014 | LureAlbion | LZ14 | Banon | 1  | JO | NA | forte | 80,36263736 | 163,85455 | 6,37694 | 105,52121 | 534,49616  | 117,25621 | 11,53892 |
| 2014 | LureAlbion | LZ14 | Banon | 1  | JO | NA | forte | 115,8269231 | 98,04848  | 6,17269 | 103,42424 | 433,35919  | 107,57531 | 10,47619 |
| 2014 | LureAlbion | LZ14 | Banon | 1  | JO | NA | forte | 110,5998168 | 145,45455 | 7,52254 | 105,19394 | 1103,12067 | 113,34887 | 15,08242 |
| 2014 | LureAlbion | LZ14 | Banon | 1  | JO | NA | forte | 111,0375458 | 160,20606 | NA      | 98,46061  | 981,38490  | 113,17028 | 13,34890 |
| 2014 | LureAlbion | LZ14 | Banon | 1  | JO | NA | forte | 125,8937729 | NA        | NA      | 113,45455 | NA         | 112,96457 | 10,74771 |
| 2014 | LureAlbion | LZ14 | Banon | 16 | JO | NA | forte | 112,7234432 | 139,11111 | 6,66505 | 101,36667 | 556,95319  | 119,49511 | 11,48443 |
| 2014 | LureAlbion | LZ14 | Banon | 16 | JO | NA | forte | 114,2545788 | 122,60202 | 6,52568 | 100,38788 | 289,04719  | 115,40284 | 9,67262  |
| 2014 | LureAlbion | LZ14 | Banon | 16 | JO | NA | forte | 115,8168498 | 110,17374 | 8,47961 | 112,60000 | 455,89708  | 116,34653 | 10,41438 |
| 2014 | LureAlbion | LZ14 | Banon | 16 | JO | NA | forte | 103,7188645 | 128,41212 | 7,32358 | 111,78788 | 715,32284  | 119,83085 | 9,68544  |
| 2014 | LureAlbion | LZ14 | Banon | 16 | JO | NA | forte | 126,2179487 | 83,68485  | 6,01118 | 102,56364 | 529,40653  | 107,02215 | 10,13965 |
| 2014 | LureAlbion | LZ14 | Banon | 16 | JO | NA | forte | 124,4945055 | 128,14949 | 8,12595 | 111,69091 | NA         | 111,17091 | 10,85623 |
| 2014 | LureAlbion | LZ14 | Banon | 16 | JO | NA | forte | 122,0622711 | 73,79394  | 6,89219 | 101,15758 | NA         | 115,88543 | 10,69185 |
| 2014 | LureAlbion | LZ14 | Banon | 16 | JO | NA | forte | 127,6501832 | 117,57576 | 7,05380 | 104,34545 | NA         | 109,45763 | 10,63919 |
| 2014 | LureAlbion | LZ14 | Banon | 16 | JO | NA | forte | 120,1474359 | NA        | 6,20211 | 100,81212 | NA         | 121,70685 | 10,89515 |
| 2014 | LureAlbion | LZ14 | Banon | 16 | JO | NA | forte | 127,4102564 | NA        | NA      | 95,53939  | NA         | 107,21628 | 11,18040 |
| 2014 | LureAlbion | LZ14 | Banon | 18 | JO | NA | forte | 134,6739927 | 167,20606 | 7,47779 | 96,28485  | 930,91418  | 163,77697 | 12,11676 |
| 2014 | LureAlbion | LZ14 | Banon | 18 | JO | NA | forte | 136,6465201 | 177,03434 | 7,96680 | 99,16970  | 544,89238  | 165,82594 | 18,35577 |
| 2014 | LureAlbion | LZ14 | Banon | 18 | JO | NA | forte | 140,9917582 | 75,76162  | 7,22081 | 103,95758 | 551,91458  | 175,67507 | 14,55769 |
| 2014 | LureAlbion | LZ14 | Banon | 18 | JO | NA | forte | 156,3177656 | 120,48485 | 7,06136 | 97,64848  | 1330,96598 | 176,39039 | 12,16941 |
| 2014 | LureAlbion | LZ14 | Banon | 18 | JO | NA | forte | 141,3608059 | 200,19798 | 7,85554 | 106,47879 | 1561,91610 | 172,24425 | 8,95398  |
| 2014 | LureAlbion | LZ14 | Banon | 18 | JO | NA | forte | 118,7619048 | 170,32727 | 8,38736 | 101,22424 | NA         | 168,32558 | 13,09066 |
| 2014 | LureAlbion | LZ14 | Banon | 18 | JO | NA | forte | 127,1318681 | 98,97576  | 7,89217 | 108,03636 | NA         | 176,10717 | 11,27953 |
| 2014 | LureAlbion | LZ14 | Banon | 18 | JO | NA | forte | 143,224359  | 158,03636 | 7,57899 | 108,73939 | NA         | 178,02809 | 14,51923 |



|      |            |      |           |    |    |    |        |             |           |         |           |            |           |          |
|------|------------|------|-----------|----|----|----|--------|-------------|-----------|---------|-----------|------------|-----------|----------|
| 2014 | LureAlbion | LZ14 | Banon     | 18 | JO | NA | forte  | 134,4065934 | NA        | 8,27610 | 109,40606 | NA         | 159,88222 | 11,86447 |
| 2014 | LureAlbion | LZ14 | Banon     | 18 | JO | NA | forte  | 111,6135531 | NA        | 7,52473 | 92,60606  | NA         | 159,62806 | 17,32212 |
| 2014 | Valensole  | VM14 | Puimichel | 19 | JO | NA | faible | 121,4569597 | 111,60000 | 7,97917 | 110,17576 | 1377,58527 | 166,76178 | 13,27976 |
| 2014 | Valensole  | VM14 | Puimichel | 19 | JO | NA | faible | 124,6950549 | 103,25657 | 7,63187 | 104,72727 | 545,09060  | 158,60799 | 12,01053 |
| 2014 | Valensole  | VM14 | Puimichel | 19 | JO | NA | faible | 125,1419414 | 176,00000 | 7,95433 | 106,59394 | 1095,44443 | 155,56266 | 12,58196 |
| 2014 | Valensole  | VM14 | Puimichel | 19 | JO | NA | faible | 112,9642857 | 77,46061  | 7,89698 | 102,73333 | 826,24177  | 153,76279 | 12,71429 |
| 2014 | Valensole  | VM14 | Puimichel | 19 | JO | NA | faible | 129,224359  | 129,61212 | 8,91094 | 115,73939 | 737,01131  | 164,65877 | 15,62408 |
| 2014 | Valensole  | VM14 | Puimichel | 19 | JO | NA | faible | 125,8974359 | 71,24848  | 7,97344 | 104,95758 | 497,72667  | 152,87642 | 12,00641 |
| 2014 | Valensole  | VM14 | Puimichel | 19 | JO | NA | faible | 133,6510989 | 161,31717 | 8,61653 | 111,87879 | 1470,48025 | 160,09576 | 11,59249 |
| 2014 | Valensole  | VM14 | Puimichel | 19 | JO | NA | faible | 141,6245421 | 85,15556  | 8,82109 | 105,34545 | 245,94233  | 151,54046 | 11,99130 |
| 2014 | Valensole  | VM14 | Puimichel | 19 | JO | NA | faible | 150,9505495 | NA        | 8,09707 | 113,18182 | NA         | 165,41318 | 13,88736 |
| 2014 | Valensole  | VM14 | Puimichel | 19 | JO | NA | faible | 159,2234432 | NA        | 8,58883 | 108,97576 | NA         | 157,62891 | 13,03938 |
| 2014 | Valensole  | VM14 | Puimichel | 3  | JO | NA | faible | 153,0467033 | 105,45455 | 7,92514 | 110,38182 | 2103,45110 | 145,26463 | 18,79029 |
| 2014 | Valensole  | VM14 | Puimichel | 3  | JO | NA | faible | 131,1346154 | 139,52323 | 6,84501 | 104,29697 | 1515,45117 | 162,30914 | 14,54304 |
| 2014 | Valensole  | VM14 | Puimichel | 3  | JO | NA | faible | 167,981685  | 226,71515 | 8,16621 | 111,40606 | 1207,38670 | 150,75160 | 16,58745 |
| 2014 | Valensole  | VM14 | Puimichel | 3  | JO | NA | faible | 151,0009158 | 169,96364 | 8,01648 | 108,44848 | 1597,25914 | 163,12790 | 17,82372 |
| 2014 | Valensole  | VM14 | Puimichel | 3  | JO | NA | faible | 132,7838828 | 148,90101 | 5,26820 | 96,93333  | 1157,46870 | 150,85652 | 11,31822 |
| 2014 | Valensole  | VM14 | Puimichel | 3  | JO | NA | faible | 131,0934066 | 178,64242 | 6,38484 | 99,38788  | 747,55897  | 141,66515 | 18,39423 |
| 2014 | Valensole  | VM14 | Puimichel | 3  | JO | NA | faible | 120,0604396 | 221,68081 | 7,99245 | 108,93333 | 1586,46450 | 142,94085 | 18,02015 |
| 2014 | Valensole  | VM14 | Puimichel | 3  | JO | NA | faible | 131,4056777 | 206,65455 | 7,01236 | 100,87879 | 1418,90709 | 147,59690 | 19,90201 |
| 2014 | Valensole  | VM14 | Puimichel | 3  | JO | NA | faible | 123,0064103 | NA        | 7,77267 | 99,04242  | 1413,16287 | 163,03510 | 17,23970 |
| 2014 | Valensole  | VM14 | Puimichel | 3  | JO | NA | faible | 128,8827839 | NA        | 6,92960 | 96,91515  | NA         | 166,37079 | NA       |
| 2014 | Valensole  | VM14 | Puimichel | 4  | JO | NA | faible | 127,7912088 | 113,84646 | 5,98420 | 97,64848  | 767,81749  | 118,69372 | 17,32326 |
| 2014 | Valensole  | VM14 | Puimichel | 4  | JO | NA | faible | 181,1391941 | 105,10303 | 6,94746 | 107,43636 | 371,97743  | 118,44621 | 15,38919 |
| 2014 | Valensole  | VM14 | Puimichel | 4  | JO | NA | faible | 144,9899267 | 116,25051 | 5,28434 | 101,34545 | 569,94180  | 124,02108 | 13,59615 |
| 2014 | Valensole  | VM14 | Puimichel | 4  | JO | NA | faible | 166,3269231 | 123,16970 | 7,39732 | 116,90303 | 367,15002  | 114,18889 | 10,47024 |
| 2014 | Valensole  | VM14 | Puimichel | 4  | JO | NA | faible | 128,4880952 | 161,21212 | 6,76053 | 107,35152 | 463,79224  | 114,38544 | 13,63805 |
| 2014 | Valensole  | VM14 | Puimichel | 4  | JO | NA | faible | 126,8177656 | 94,46667  | 6,90614 | 110,27576 | 717,06153  | 118,35706 | 13,59982 |
| 2014 | Valensole  | VM14 | Puimichel | 4  | JO | NA | faible | 176,8946886 | 129,00202 | 7,98970 | 117,35152 | 480,61489  | 151,46791 | 10,00778 |
| 2014 | Valensole  | VM14 | Puimichel | 4  | JO | NA | faible | 131,1391941 | 103,91111 | 7,66575 | 120,13333 | 615,86721  | 117,86172 | 12,78709 |
| 2014 | Valensole  | VM14 | Puimichel | 4  | JO | NA | faible | 116,7234432 | 117,12121 | 7,17811 | 109,03030 | 434,70910  | 121,88312 | 15,62088 |
| 2014 | Valensole  | VM14 | Puimichel | 4  | JO | NA | faible | 88,42673993 | NA        | 7,40133 | 108,09091 | NA         | 118,54667 | NA       |
| 2014 | Valensole  | VM14 | Puimichel | 5  | JO | NA | faible | 114,2591575 | 113,27879 | 7,75069 | 118,56970 | 776,16402  | 125,51517 | 8,35165  |
| 2014 | Valensole  | VM14 | Puimichel | 5  | JO | NA | faible | 74,89697802 | 128,48485 | 5,86848 | 103,04242 | 1227,13983 | 125,72017 | 11,98306 |
| 2014 | Valensole  | VM14 | Puimichel | 5  | JO | NA | faible | 100,8974359 | 143,94545 | 6,85005 | 109,56364 | 859,74291  | 138,28016 | 11,96841 |
| 2014 | Valensole  | VM14 | Puimichel | 5  | JO | NA | faible | 85,73626374 | 151,63636 | 5,58952 | 94,69394  | 799,00207  | 140,12378 | 9,56456  |
| 2014 | Valensole  | VM14 | Puimichel | 5  | JO | NA | faible | 82,06318681 | 175,64848 | 5,83757 | 105,41212 | 653,22139  | 136,35817 | 10,47527 |
| 2014 | Valensole  | VM14 | Puimichel | 5  | JO | NA | faible | 85,98443223 | 94,53333  | 6,99004 | 116,06061 | 1313,92658 | 131,66204 | 9,34341  |
| 2014 | Valensole  | VM14 | Puimichel | 5  | JO | NA | faible | 121,4276557 | 161,12121 | 6,64652 | 110,11515 | 1146,31600 | 139,46756 | 18,29396 |
| 2014 | Valensole  | VM14 | Puimichel | 5  | JO | NA | faible | 124,5741758 | 150,16364 | 6,72963 | 115,42424 | 914,59493  | 133,03549 | 5,68956  |
| 2014 | Valensole  | VM14 | Puimichel | 5  | JO | NA | faible | 122,5164835 | 186,96364 | 6,33345 | 108,23030 | 1348,41626 | 136,01554 | 8,81456  |

|      |           |      |           |    |    |    |        |             |           |         |           |            |           |          |
|------|-----------|------|-----------|----|----|----|--------|-------------|-----------|---------|-----------|------------|-----------|----------|
| 2014 | Valensole | VM14 | Puimichel | 5  | JO | NA | faible | 120,3717949 | 178,82828 | 5,73718 | 107,36667 | 642,14509  | 112,51122 | 10,65247 |
| 2014 | Valensole | VM14 | Puimichel | 1  | JO | NA | faible | 121,1492674 | 146,16566 | 7,04052 | 109,50909 | 780,54480  | 127,49297 | 12,87958 |
| 2014 | Valensole | VM14 | Puimichel | 1  | JO | NA | faible | 129,7152015 | 186,77172 | 7,76694 | 117,55758 | 728,33924  | 117,99600 | 8,72436  |
| 2014 | Valensole | VM14 | Puimichel | 1  | JO | NA | faible | 119,3745421 | 195,59394 | 7,00298 | 119,53333 | 820,24553  | 121,62428 | 9,09020  |
| 2014 | Valensole | VM14 | Puimichel | 1  | JO | NA | faible | 118,4111722 | 173,84242 | 7,23169 | 117,08485 | 674,88895  | 125,32051 | 9,83150  |
| 2014 | Valensole | VM14 | Puimichel | 1  | JO | NA | faible | 119,4468864 | 175,05051 | 7,90431 | 112,58788 | 724,74132  | 117,17519 | 11,58654 |
| 2014 | Valensole | VM14 | Puimichel | 1  | JO | NA | faible | 112,9789377 | 115,41414 | 8,17399 | 121,90909 | 851,81213  | 117,05424 | 12,69963 |
| 2014 | Valensole | VM14 | Puimichel | 1  | JO | NA | faible | 117,728022  | 91,33333  | 7,29396 | 115,35758 | 733,77041  | 128,20336 | 9,63668  |
| 2014 | Valensole | VM14 | Puimichel | 1  | JO | NA | faible | 153,2371795 | 164,68283 | 8,32235 | 123,01818 | 513,52172  | 118,92852 | 13,49863 |
| 2014 | Valensole | VM14 | Puimichel | 1  | JO | NA | faible | 132,5540293 | 166,49293 | 8,38359 | 115,11515 | 719,72053  | 120,09382 | 12,09524 |
| 2014 | Valensole | VM14 | Puimichel | 1  | JO | NA | faible | 123,2619048 | 195,41414 | 7,05838 | 111,22424 | NA         | 112,32518 | 11,24634 |
| 2014 | Valensole | VM14 | Puimichel | 21 | JO | NA | forte  | 83,56456044 | 46,16566  | 5,93590 | 106,13333 | 1309,33886 | 139,58620 | 15,14148 |
| 2014 | Valensole | VM14 | Puimichel | 21 | JO | NA | forte  | 91,23076923 | 133,98182 | 4,87603 | 111,53939 | 1009,71008 | 129,64128 | 12,55998 |
| 2014 | Valensole | VM14 | Puimichel | 21 | JO | NA | forte  | 99,91849817 | 128,24242 | 4,89423 | 100,10303 | 964,44119  | 152,17400 | 11,18132 |
| 2014 | Valensole | VM14 | Puimichel | 21 | JO | NA | forte  | 87,87912088 | 103,86667 | 5,51511 | 103,08485 | 1471,16210 | 138,92321 | 13,44643 |
| 2014 | Valensole | VM14 | Puimichel | 21 | JO | NA | forte  | 103,3159341 | 90,49293  | 6,15705 | 112,42727 | 1704,80951 | 140,73591 | 14,17674 |
| 2014 | Valensole | VM14 | Puimichel | 21 | JO | NA | forte  | 97,76282051 | 122,07677 | 5,78434 | 116,58182 | 1444,50089 | 136,31540 | 14,42537 |
| 2014 | Valensole | VM14 | Puimichel | 21 | JO | NA | forte  | 99,03479853 | 108,27879 | 5,37328 | 107,15758 | 1162,29937 | 150,74862 | 10,95101 |
| 2014 | Valensole | VM14 | Puimichel | 21 | JO | NA | forte  | 99,94047619 | 87,07879  | 5,97734 | 104,38788 | 1263,16723 | 141,57565 | 11,49863 |
| 2014 | Valensole | VM14 | Puimichel | 21 | JO | NA | forte  | 105,9716117 | 114,95354 | 3,84203 | 115,68485 | 1324,37888 | 153,46201 | 10,17628 |
| 2014 | Valensole | VM14 | Puimichel | 21 | JO | NA | forte  | 55,31318681 | 50,47273  | NA      | 92,89091  | NA         | 136,91308 | 11,83242 |
| 2014 | Valensole | VM14 | Puimichel | 6  | JO | NA | forte  | 70,91025641 | 96,94545  | 4,92823 | 106,42424 | 927,78447  | 151,28711 | 12,05769 |
| 2014 | Valensole | VM14 | Puimichel | 6  | JO | NA | forte  | 72,38919414 | 175,24848 | 5,25824 | 114,14545 | 1602,84914 | 150,20467 | 12,86264 |
| 2014 | Valensole | VM14 | Puimichel | 6  | JO | NA | forte  | 85,37912088 | 152,23030 | 5,15282 | 109,52727 | 856,13367  | 155,61296 | 15,94048 |
| 2014 | Valensole | VM14 | Puimichel | 6  | JO | NA | forte  | 70,05494505 | 113,22828 | 3,88759 | 95,67273  | 1031,73210 | 144,35757 | 12,01465 |
| 2014 | Valensole | VM14 | Puimichel | 6  | JO | NA | forte  | 76,34798535 | 161,08687 | 5,67823 | 106,33333 | 595,49804  | 159,19970 | 16,59386 |
| 2014 | Valensole | VM14 | Puimichel | 6  | JO | NA | forte  | 75,87912088 | 158,59394 | 6,33883 | 115,35455 | 1247,63330 | 138,68960 | 16,14148 |
| 2014 | Valensole | VM14 | Puimichel | 6  | JO | NA | forte  | 87,3021978  | 147,15152 | 5,55311 | 128,87879 | 422,25855  | 146,46581 | 12,30311 |
| 2014 | Valensole | VM14 | Puimichel | 6  | JO | NA | forte  | 98,40018315 | 105,97172 | 4,93544 | 109,15758 | 870,66844  | 149,97554 | 11,17102 |
| 2014 | Valensole | VM14 | Puimichel | 6  | JO | NA | forte  | 106,4001832 | 183,71313 | NA      | 102,56364 | 1088,92784 | 154,88708 | 11,15064 |
| 2014 | Valensole | VM14 | Puimichel | 6  | JO | NA | forte  | 96,14468864 | NA        | NA      | NA        | 1412,72573 | 143,41159 | 10,49267 |
| 2014 | Valensole | VM14 | Puimichel | 10 | JO | NA | forte  | 90,99725275 | 137,11111 | 6,63153 | 114,70303 | 518,88150  | 150,74389 | 11,47985 |
| 2014 | Valensole | VM14 | Puimichel | 10 | JO | NA | forte  | 85,76465201 | 112,00000 | 5,80678 | 120,87273 | 720,59305  | 153,25906 | 11,59570 |
| 2014 | Valensole | VM14 | Puimichel | 10 | JO | NA | forte  | 92,59615385 | 128,72727 | 6,13965 | 109,99394 | 334,64395  | 154,15067 | 11,99771 |
| 2014 | Valensole | VM14 | Puimichel | 10 | JO | NA | forte  | 92,23351648 | 125,59596 | 6,61127 | 115,89091 | 263,91740  | 151,55840 | 11,67949 |
| 2014 | Valensole | VM14 | Puimichel | 10 | JO | NA | forte  | 87,78205128 | 83,69293  | 6,44162 | 118,53939 | 799,16962  | 136,43533 | 7,81319  |
| 2014 | Valensole | VM14 | Puimichel | 10 | JO | NA | forte  | 99,15934066 | 68,55152  | 6,54625 | 126,19394 | 790,69906  | 149,36446 | 11,24313 |
| 2014 | Valensole | VM14 | Puimichel | 10 | JO | NA | forte  | 97,08608059 | 126,47677 | 6,83837 | 113,25455 | 498,40759  | 156,67744 | 13,52473 |
| 2014 | Valensole | VM14 | Puimichel | 10 | JO | NA | forte  | 102,1565934 | 171,55960 | 6,03915 | 112,34545 | 1035,23630 | 137,45215 | 11,84386 |
| 2014 | Valensole | VM14 | Puimichel | 10 | JO | NA | forte  | 91,23168498 | NA        | 4,73626 | 114,83030 | NA         | 144,33998 | 10,29625 |
| 2014 | Valensole | VM14 | Puimichel | 10 | JO | NA | forte  | 107,1858974 | NA        | 6,64858 | 127,78182 | NA         | 141,97749 | 11,83516 |

|      |           |      |           |    |    |    |        |             |           |         |           |            |           |          |
|------|-----------|------|-----------|----|----|----|--------|-------------|-----------|---------|-----------|------------|-----------|----------|
| 2014 | Valensole | VM14 | Puimichel | 14 | JO | NA | forte  | 100,3351648 | 87,18788  | 5,33059 | 111,12727 | 904,16519  | 163,87550 | 17,25595 |
| 2014 | Valensole | VM14 | Puimichel | 14 | JO | NA | forte  | 105,7014652 | 86,83636  | 5,50343 | 108,70303 | 986,38952  | 163,27327 | 17,01236 |
| 2014 | Valensole | VM14 | Puimichel | 14 | JO | NA | forte  | 124,0119048 | 112,92525 | 5,41518 | 125,00606 | 630,31023  | 165,93007 | 24,91209 |
| 2014 | Valensole | VM14 | Puimichel | 14 | JO | NA | forte  | 109,1895604 | 99,46667  | 4,83173 | 120,48485 | 949,02880  | 148,35609 | 11,18910 |
| 2014 | Valensole | VM14 | Puimichel | 14 | JO | NA | forte  | 137,3333333 | 105,31515 | 6,00137 | 117,72121 | 1117,37922 | 169,66775 | 16,73489 |
| 2014 | Valensole | VM14 | Puimichel | 14 | JO | NA | forte  | 119,967033  | 81,78182  | 5,92308 | 127,24848 | 765,90678  | 157,14089 | 13,56387 |
| 2014 | Valensole | VM14 | Puimichel | 14 | JO | NA | forte  | 115,9111722 | 115,60808 | 5,08883 | 109,19394 | 744,00999  | 155,24425 | 15,64332 |
| 2014 | Valensole | VM14 | Puimichel | 14 | JO | NA | forte  | 139,4954212 | 106,30909 | 5,53251 | 116,84848 | NA         | 163,43383 | 18,06960 |
| 2014 | Valensole | VM14 | Puimichel | 14 | JO | NA | forte  | 94,8470696  | 110,09697 | NA      | 125,09697 | NA         | 147,19786 | 15,64606 |
| 2014 | Valensole | VM14 | Puimichel | 14 | JO | NA | forte  | 88,36263736 | NA        | NA      | 129,95152 | NA         | 162,68948 | 14,75687 |
| 2014 | Valensole | VM14 | Puimichel | 8  | JO | NA | forte  | 73,46153846 | 84,76364  | 5,37775 | 109,16667 | 404,85485  | 151,41042 | 10,96108 |
| 2014 | Valensole | VM14 | Puimichel | 8  | JO | NA | forte  | 81,31410256 | 110,54545 | 4,74176 | 119,03636 | 729,20283  | 153,82167 | 12,20925 |
| 2014 | Valensole | VM14 | Puimichel | 8  | JO | NA | forte  | 80,60714286 | 115,24242 | 5,64320 | 123,84242 | 946,79976  | 144,05314 | 13,26305 |
| 2014 | Valensole | VM14 | Puimichel | 8  | JO | NA | forte  | 79,56043956 | 182,34545 | 4,63439 | 129,41212 | 1041,77847 | 144,41910 | 14,65339 |
| 2014 | Valensole | VM14 | Puimichel | 8  | JO | NA | forte  | 84,87637363 | 115,68081 | 4,79945 | 113,87576 | 586,04987  | 145,20128 | 13,96016 |
| 2014 | Valensole | VM14 | Puimichel | 8  | JO | NA | forte  | 101,0338828 | 157,98182 | 5,15385 | 130,46061 | 818,36760  | 145,40661 | 11,90339 |
| 2014 | Valensole | VM14 | Puimichel | 8  | JO | NA | forte  | 100,7554945 | 97,83434  | 4,92617 | 133,80000 | 740,60851  | 145,89609 | 13,64286 |
| 2014 | Valensole | VM14 | Puimichel | 8  | JO | NA | forte  | 105,3571429 | NA        | 5,97734 | 150,68485 | 738,73327  | 138,64960 | 12,96016 |
| 2014 | Valensole | VM14 | Puimichel | 8  | JO | NA | forte  | 104,8278388 | NA        | 5,18017 | 109,70303 | 774,22227  | 151,91609 | 10,24542 |
| 2014 | Valensole | VM14 | Puimichel | 8  | JO | NA | forte  | 100,1721612 | NA        | NA      | 121,47879 | NA         | NA        | NA       |
| 2014 | Valensole | VP14 | Roumoules | 7  | JO | NA | faible | 112,5586081 | 48,54545  | 6,50504 | 109,53939 | 1046,97988 | 156,95632 | 10,51786 |
| 2014 | Valensole | VP14 | Roumoules | 7  | JO | NA | faible | 119,7820513 | 115,29697 | 6,33723 | 136,32121 | 813,46604  | 151,93547 | 9,16621  |
| 2014 | Valensole | VP14 | Roumoules | 7  | JO | NA | faible | 108,2957875 | 101,26667 | 6,28732 | 118,66667 | 804,90751  | 156,81076 | 11,20971 |
| 2014 | Valensole | VP14 | Roumoules | 7  | JO | NA | faible | 109,0210623 | 119,85859 | 6,09432 | 123,14848 | 815,31292  | 157,88566 | 9,71200  |
| 2014 | Valensole | VP14 | Roumoules | 7  | JO | NA | faible | 104,6932234 | 81,43434  | 6,42972 | 123,98182 | 489,58296  | 146,68547 | 14,58333 |
| 2014 | Valensole | VP14 | Roumoules | 7  | JO | NA | faible | 115,5137363 | 74,80000  | 5,90831 | 131,00303 | 691,18295  | 146,13734 | 12,66850 |
| 2014 | Valensole | VP14 | Roumoules | 7  | JO | NA | faible | 147,1227106 | 81,75152  | 5,45501 | 112,93939 | 456,18126  | 146,56477 | 15,04762 |
| 2014 | Valensole | VP14 | Roumoules | 7  | JO | NA | faible | 118,9615385 | 121,16970 | 6,18498 | 114,04242 | 389,87629  | 152,34303 | 10,45330 |
| 2014 | Valensole | VP14 | Roumoules | 7  | JO | NA | faible | 128,6428571 | 124,91313 | 6,36836 | 122,36970 | 671,85159  | 144,78295 | 12,99863 |
| 2014 | Valensole | VP14 | Roumoules | 7  | JO | NA | faible | 114,6923077 | 115,22424 | NA      | 128,33939 | NA         | 139,16979 | 12,60211 |
| 2014 | Valensole | VP14 | Roumoules | 9  | JO | NA | faible | 147,0815018 | 176,45657 | 7,69231 | 124,52121 | 1484,60734 | 145,92730 | 12,19597 |
| 2014 | Valensole | VP14 | Roumoules | 9  | JO | NA | faible | 143,0457875 | 110,73535 | 7,48535 | 118,45758 | 1133,79017 | 154,70709 | 11,88278 |
| 2014 | Valensole | VP14 | Roumoules | 9  | JO | NA | faible | 146,6181319 | 130,43030 | 5,71887 | 98,05758  | 1053,99795 | 144,65946 | 10,05815 |
| 2014 | Valensole | VP14 | Roumoules | 9  | JO | NA | faible | 141,2967033 | 100,34343 | 7,71749 | 120,22121 | 1319,49184 | 147,89035 | 13,07967 |
| 2014 | Valensole | VP14 | Roumoules | 9  | JO | NA | faible | 150,6813187 | 121,32929 | 8,26855 | 132,81212 | 1559,63994 | 160,37008 | 13,20810 |
| 2014 | Valensole | VP14 | Roumoules | 9  | JO | NA | faible | 126,8626374 | 169,96364 | 6,25034 | 107,36364 | 1159,03910 | 142,84100 | 8,15179  |
| 2014 | Valensole | VP14 | Roumoules | 9  | JO | NA | faible | 137,4395604 | 148,24848 | 8,42331 | 127,52727 | 1758,25890 | 158,21811 | 12,07875 |
| 2014 | Valensole | VP14 | Roumoules | 9  | JO | NA | faible | 146,6034799 | 121,76970 | 7,36493 | 116,77576 | 1118,18748 | 159,80471 | 10,96016 |
| 2014 | Valensole | VP14 | Roumoules | 9  | JO | NA | faible | 93,61172161 | NA        | 6,74680 | 114,68485 | 1208,66200 | 156,23854 | 10,40476 |
| 2014 | Valensole | VP14 | Roumoules | 9  | JO | NA | faible | 147,7957875 | NA        | 7,40865 | 121,83939 | NA         | 149,19578 | 10,24725 |
| 2014 | Valensole | VP14 | Roumoules | 14 | JO | NA | faible | 114,0824176 | 113,92323 | 7,73214 | 128,73030 | 1400,65569 | 165,00987 | 9,56044  |

|      |           |      |           |    |    |    |        |             |           |          |           |            |           |          |
|------|-----------|------|-----------|----|----|----|--------|-------------|-----------|----------|-----------|------------|-----------|----------|
| 2014 | Valensole | VP14 | Roumoules | 14 | JO | NA | faible | 124,2335165 | 112,11717 | 8,17926  | 125,34545 | 1103,27804 | 153,61723 | 9,78526  |
| 2014 | Valensole | VP14 | Roumoules | 14 | JO | NA | faible | 113,4230769 | 92,33131  | 8,75572  | 142,60000 | 1152,24340 | 145,47772 | 11,36538 |
| 2014 | Valensole | VP14 | Roumoules | 14 | JO | NA | faible | 108,764652  | 120,75152 | 8,38530  | 134,16667 | 1294,81379 | 149,39786 | 12,56456 |
| 2014 | Valensole | VP14 | Roumoules | 14 | JO | NA | faible | 99,82783883 | 144,92727 | 8,68578  | 121,34848 | 1132,79551 | 149,82426 | 8,23352  |
| 2014 | Valensole | VP14 | Roumoules | 14 | JO | NA | faible | 108,9038462 | 107,24242 | 8,42811  | 127,17576 | 1270,97528 | 149,05631 | 10,66667 |
| 2014 | Valensole | VP14 | Roumoules | 14 | JO | NA | faible | 132,8974359 | 170,78182 | 7,25412  | 136,36364 | 711,45743  | 165,05147 | 9,54441  |
| 2014 | Valensole | VP14 | Roumoules | 14 | JO | NA | faible | 133,3067766 | 174,29091 | 9,75252  | 120,77576 | 845,76198  | 153,06442 | 11,85989 |
| 2014 | Valensole | VP14 | Roumoules | 14 | JO | NA | faible | 145,8076923 | 103,31515 | 8,63416  | 140,55152 | 912,58096  | 149,48352 | 8,64515  |
| 2014 | Valensole | VP14 | Roumoules | 14 | JO | NA | faible | 154,8827839 | 122,87879 | NA       | 139,76970 | NA         | 144,09245 | 8,68681  |
| 2014 | Valensole | VP14 | Roumoules | 12 | JO | NA | faible | 148,5970696 | 144,66667 | 9,36607  | 146,53939 | 1875,62113 | 164,13730 | 10,18590 |
| 2014 | Valensole | VP14 | Roumoules | 12 | JO | NA | faible | 147,7948718 | 147,01818 | 10,09112 | 152,58182 | 1710,25397 | 164,75476 | 5,53571  |
| 2014 | Valensole | VP14 | Roumoules | 12 | JO | NA | faible | 145,5631868 | 136,13737 | 8,16736  | 143,65758 | 1546,01941 | 148,91313 | 8,51740  |
| 2014 | Valensole | VP14 | Roumoules | 12 | JO | NA | faible | 143,5009158 | 114,54545 | 8,55609  | 139,11515 | 1223,09066 | 161,37075 | 13,03617 |
| 2014 | Valensole | VP14 | Roumoules | 12 | JO | NA | faible | 135,724359  | 116,42020 | 8,83745  | 151,17576 | 934,61966  | 173,14959 | 7,73214  |
| 2014 | Valensole | VP14 | Roumoules | 12 | JO | NA | faible | 134,6868132 | 151,03030 | 9,55609  | 152,83030 | 1387,44204 | 160,44793 | 7,27930  |
| 2014 | Valensole | VP14 | Roumoules | 12 | JO | NA | faible | 148,2802198 | 115,92727 | 9,10577  | 125,27273 | NA         | 168,15976 | 7,91712  |
| 2014 | Valensole | VP14 | Roumoules | 12 | JO | NA | faible | 154,4697802 | 119,33737 | 9,23581  | 142,59394 | NA         | 152,57512 | 7,18544  |
| 2014 | Valensole | VP14 | Roumoules | 12 | JO | NA | faible | 142,1868132 | 124,29091 | NA       | 152,12727 | NA         | 163,50049 | 6,67239  |
| 2014 | Valensole | VP14 | Roumoules | 12 | JO | NA | faible | 125,7371795 | NA        | NA       | 124,89697 | NA         | 166,29568 | NA       |
| 2014 | Valensole | VP14 | Roumoules | 6  | JO | NA | faible | 147,3534799 | 135,12323 | 8,51145  | 145,09697 | NA         | 117,58895 | 9,07486  |
| 2014 | Valensole | VP14 | Roumoules | 6  | JO | NA | faible | 151,7619048 | 146,16970 | 8,99382  | 150,02424 | 426,80081  | 136,81625 | 10,51923 |
| 2014 | Valensole | VP14 | Roumoules | 6  | JO | NA | faible | 139,4661172 | 162,85657 | 8,63530  | 134,19394 | 189,58943  | 124,86824 | 10,48764 |
| 2014 | Valensole | VP14 | Roumoules | 6  | JO | NA | faible | 127,6913919 | 144,72121 | 9,03537  | 150,04242 | 809,48082  | 141,82910 | 9,64973  |
| 2014 | Valensole | VP14 | Roumoules | 6  | JO | NA | faible | 156,1401099 | 123,81414 | 9,42010  | 158,69091 | 588,03655  | 136,12955 | 11,88919 |
| 2014 | Valensole | VP14 | Roumoules | 6  | JO | NA | faible | 149,1849817 | 156,61010 | 8,41174  | 150,38182 | 857,62933  | 144,08891 | 8,42308  |
| 2014 | Valensole | VP14 | Roumoules | 6  | JO | NA | faible | 151,2857143 | 57,52727  | 10,14332 | 167,51515 | 496,32359  | 132,41970 | 9,34020  |
| 2014 | Valensole | VP14 | Roumoules | 6  | JO | NA | faible | 125,9990842 | NA        | 9,81250  | 161,32121 | 604,37410  | 128,06506 | 8,16346  |
| 2014 | Valensole | VP14 | Roumoules | 6  | JO | NA | faible | 115,4075092 | NA        | 9,81548  | 143,78788 | NA         | 136,15804 | 8,40934  |
| 2014 | Valensole | VP14 | Roumoules | 6  | JO | NA | faible | 157,6428571 | NA        | NA       | 155,02424 | NA         | 136,66459 | NA       |
| 2014 | Valensole | VP14 | Roumoules | 10 | JO | NA | forte  | 111,6304945 | 99,60000  | 7,12122  | 140,72121 | 937,81217  | 137,57713 | 8,74451  |
| 2014 | Valensole | VP14 | Roumoules | 10 | JO | NA | forte  | 114,0595238 | 122,93737 | 7,97184  | 145,84242 | 448,39909  | 133,58290 | 9,21337  |
| 2014 | Valensole | VP14 | Roumoules | 10 | JO | NA | forte  | 122,1483516 | 59,48485  | 7,80426  | 142,89091 | 635,67511  | 146,43155 | 5,83585  |
| 2014 | Valensole | VP14 | Roumoules | 10 | JO | NA | forte  | 103,9038462 | 79,41010  | 8,06342  | 150,10909 | 696,73955  | 149,63435 | 7,24359  |
| 2014 | Valensole | VP14 | Roumoules | 10 | JO | NA | forte  | 116,4395604 | 116,11515 | 8,37466  | 143,44242 | 802,14951  | 140,25941 | 7,86767  |
| 2014 | Valensole | VP14 | Roumoules | 10 | JO | NA | forte  | 108,2774725 | 112,08889 | 8,45261  | 143,36364 | 374,64646  | 148,85158 | 5,74954  |
| 2014 | Valensole | VP14 | Roumoules | 10 | JO | NA | forte  | 127,5338828 | 96,86869  | 8,63187  | 147,46667 | 571,54500  | 128,53768 | 6,53228  |
| 2014 | Valensole | VP14 | Roumoules | 10 | JO | NA | forte  | 136,025641  | NA        | 9,15430  | 158,62424 | NA         | 143,69047 | 7,04670  |
| 2014 | Valensole | VP14 | Roumoules | 10 | JO | NA | forte  | 144,6648352 | NA        | 8,59032  | 148,87273 | NA         | 142,41962 | 3,83059  |
| 2014 | Valensole | VP14 | Roumoules | 10 | JO | NA | forte  | 139,8214286 | NA        | NA       | 151,74545 | NA         | 148,80879 | NA       |
| 2014 | Valensole | VP14 | Roumoules | 18 | JO | NA | forte  | 143,1959707 | 124,61414 | 8,78125  | 138,04242 | 766,06078  | 136,04636 | 7,92353  |
| 2014 | Valensole | VP14 | Roumoules | 18 | JO | NA | forte  | 152,2527473 | 95,48687  | 7,75069  | 144,74545 | 1586,02626 | 145,30755 | 8,86630  |

|                |      |           |       |    |            |             |           |         |           |            |           |          |
|----------------|------|-----------|-------|----|------------|-------------|-----------|---------|-----------|------------|-----------|----------|
| 2014 Valensole | VP14 | Roumoules | 18 JO | NA | forte      | 142,5586081 | 96,34545  | 9,72047 | 145,73333 | 1591,15186 | 130,41296 | 14,49931 |
| 2014 Valensole | VP14 | Roumoules | 18 JO | NA | forte      | 142,3168498 | 131,81414 | 9,03022 | 149,40606 | 1001,84763 | 135,72520 | 10,17308 |
| 2014 Valensole | VP14 | Roumoules | 18 JO | NA | forte      | 134,0549451 | 131,06061 | 8,59730 | 141,21212 | 748,70996  | 128,21724 | 5,87134  |
| 2014 Valensole | VP14 | Roumoules | 18 JO | NA | forte      | 151,2399267 | 112,36768 | 8,50206 | 148,49091 | 1004,88344 | 138,52205 | 7,76511  |
| 2014 Valensole | VP14 | Roumoules | 18 JO | NA | forte      | 133,967033  | 128,63030 | 8,87958 | 142,54545 | 1004,94046 | 133,35404 | 6,64835  |
| 2014 Valensole | VP14 | Roumoules | 18 JO | NA | forte      | 134,2152015 | 82,40808  | 8,57944 | 134,43636 | 1346,87772 | 131,86464 | 7,10302  |
| 2014 Valensole | VP14 | Roumoules | 18 JO | NA | forte      | 135,1694139 | 92,91313  | 8,07280 | 142,06061 | 1241,21815 | 128,54209 | 6,34959  |
| 2014 Valensole | VP14 | Roumoules | 18 JO | NA | forte      | 136,8580586 | NA        | 8,78675 | 142,00606 | 844,25585  | 137,54485 | NA       |
| 2014 Valensole | VP14 | Roumoules | 11 JO | NA | forte      | 112,3443223 | 109,64848 | 5,80220 | 99,65758  | 1012,15687 | 131,65436 | 11,50412 |
| 2014 Valensole | VP14 | Roumoules | 11 JO | NA | forte      | 126,0686813 | 136,29697 | 6,55426 | 119,51515 | 853,69579  | 133,01185 | 14,00893 |
| 2014 Valensole | VP14 | Roumoules | 11 JO | NA | forte      | 125,4578755 | 94,34545  | 7,37775 | 131,63030 | 1474,89802 | 158,76430 | 11,03503 |
| 2014 Valensole | VP14 | Roumoules | 11 JO | NA | forte      | 124,4020147 | 91,91919  | 8,36310 | 128,36970 | 898,65221  | 143,12598 | 8,74634  |
| 2014 Valensole | VP14 | Roumoules | 11 JO | NA | forte      | 114,1446886 | 80,18182  | 6,19334 | 100,48485 | 887,39961  | 143,17886 | 10,57234 |
| 2014 Valensole | VP14 | Roumoules | 11 JO | NA | forte      | 106,28663   | 127,44848 | 7,19506 | 129,61818 | 1402,46766 | 154,80200 | 9,06937  |
| 2014 Valensole | VP14 | Roumoules | 11 JO | NA | forte      | 129,9340659 | 46,71515  | 6,41003 | 117,27879 | 1296,52321 | 146,55964 | 8,86767  |
| 2014 Valensole | VP14 | Roumoules | 11 JO | NA | forte      | 132,1263736 | 114,98788 | 7,49313 | 125,93939 | 485,54752  | 141,37157 | 9,08997  |
| 2014 Valensole | VP14 | Roumoules | 11 JO | NA | forte      | 78,11904762 | NA        | 5,97493 | 109,59394 | 754,30178  | 149,85174 | 5,64835  |
| 2014 Valensole | VP14 | Roumoules | 11 JO | NA | forte      | NA          | NA        | 7,18750 | 139,01818 | NA         | 141,86327 | NA       |
| 2014 Valensole | VP14 | Roumoules | 17 JO | NA | forte      | 127,9716117 | 108,81616 | 7,99817 | 128,80000 | 1054,77949 | 166,41487 | 9,69231  |
| 2014 Valensole | VP14 | Roumoules | 17 JO | NA | forte      | 129,9084249 | 130,24646 | 7,55769 | 132,01212 | 1354,87561 | 143,08764 | 10,69437 |
| 2014 Valensole | VP14 | Roumoules | 17 JO | NA | forte      | 81,57783883 | 133,67677 | 7,32109 | 118,46667 | 1318,45545 | 148,34098 | 12,43498 |
| 2014 Valensole | VP14 | Roumoules | 17 JO | NA | forte      | 76,04395604 | 133,19192 | 7,83173 | 119,21212 | 1170,23498 | 155,75895 | 7,57784  |
| 2014 Valensole | VP14 | Roumoules | 17 JO | NA | forte      | 109,0013736 | 59,35758  | 7,94116 | 131,34545 | 1528,89975 | 156,60398 | 12,74725 |
| 2014 Valensole | VP14 | Roumoules | 17 JO | NA | forte      | 113,739011  | 114,04848 | 8,69185 | 133,03030 | 1083,18275 | 149,18009 | 11,71016 |
| 2014 Valensole | VP14 | Roumoules | 17 JO | NA | forte      | 174,543956  | 205,35758 | 8,29052 | 137,14545 | 1361,57831 | 151,61678 | 7,11126  |
| 2014 Valensole | VP14 | Roumoules | 17 JO | NA | forte      | 135,4258242 | 98,27879  | 6,46772 | 138,15152 | 1130,31691 | 147,47120 | 13,42491 |
| 2014 Valensole | VP14 | Roumoules | 17 JO | NA | forte      | 94,26831502 | 105,48485 | 6,30907 | 111,44242 | NA         | 155,73039 | 10,33791 |
| 2014 Valensole | VP14 | Roumoules | 17 JO | NA | forte      | 121,3287546 | NA        | NA      | 129,29394 | NA         | 149,64039 | 9,31090  |
| 2014 Valensole | VP14 | Roumoules | 15 JO | NA | forte      | 123,9423077 | 115,64444 | 9,38920 | 133,41212 | 1096,39875 | 146,73631 | 8,42720  |
| 2014 Valensole | VP14 | Roumoules | 15 JO | NA | forte      | 122,5650183 | 118,71515 | 9,08379 | 154,20303 | 1253,49679 | 160,20298 | 7,02060  |
| 2014 Valensole | VP14 | Roumoules | 15 JO | NA | forte      | 114,6043956 | 210,72727 | 7,92789 | 135,24848 | 1383,55890 | 147,34102 | 11,09386 |
| 2014 Valensole | VP14 | Roumoules | 15 JO | NA | forte      | 111,7554945 | 141,00202 | 8,53182 | 133,79394 | 1479,55937 | 152,62818 | 8,43132  |
| 2014 Valensole | VP14 | Roumoules | 15 JO | NA | forte      | 122,1300366 | 165,93333 | 7,76099 | 135,73939 | 1032,93767 | 153,79586 | 11,15842 |
| 2014 Valensole | VP14 | Roumoules | 15 JO | NA | forte      | 114,7893773 | 114,46667 | 7,05186 | 122,80000 | 1312,17766 | 153,20745 | 10,58654 |
| 2014 Valensole | VP14 | Roumoules | 15 JO | NA | forte      | 128,0370879 | 116,94949 | 8,01007 | 133,87576 | 955,47015  | 142,09998 | 10,75549 |
| 2014 Valensole | VP14 | Roumoules | 15 JO | NA | forte      | 128,1282051 | 129,47071 | 7,85062 | 131,69091 | 867,81192  | 143,88316 | 8,67857  |
| 2014 Valensole | VP14 | Roumoules | 15 JO | NA | forte      | 117,0842491 | 124,73939 | 8,29533 | 125,60606 | 1209,40232 | 141,83567 | 7,64217  |
| 2014 Valensole | VP14 | Roumoules | 15 JO | NA | forte      | 127,2930403 | 137,95960 | 8,02747 | 128,05758 | 871,10985  | 150,09363 | 8,23008  |
| 2014 Drome     | DE14 | ValaurieS | 8 J30 |    | 8,8 faible | 156,4267399 | 109,28485 | 7,97631 | 120,76364 | 1030,92195 | 133,87819 | 10,41346 |
| 2014 Drome     | DE14 | ValaurieS | 8 J30 |    | 8,8 faible | 161,6959707 | 146,58182 | 7,91003 | 122,30909 | 1077,45458 | 122,89865 | 11,28022 |
| 2014 Drome     | DE14 | ValaurieS | 8 J30 |    | 8,8 faible | 141,0787546 | 97,44242  | 6,35199 | 118,53939 | 1331,60164 | 131,58469 | 13,23993 |

|            |      |           |        |             |             |           |         |           |            |           |          |
|------------|------|-----------|--------|-------------|-------------|-----------|---------|-----------|------------|-----------|----------|
| 2014 Drome | DE14 | ValaurieS | 8 J30  | 8,8 faible  | 129,8608059 | 119,26667 | 6,64801 | 112,33939 | 1270,12895 | 134,01566 | 10,96841 |
| 2014 Drome | DE14 | ValaurieS | 8 J30  | 8,8 faible  | 181,8489011 | 135,04242 | 7,23466 | 114,34545 | 1156,77637 | 120,90016 | 10,02976 |
| 2014 Drome | DE14 | ValaurieS | 8 J30  | 8,8 faible  | 170,217033  | 169,12727 | 7,19265 | 112,25758 | 866,98170  | 130,13262 | 8,89927  |
| 2014 Drome | DE14 | ValaurieS | 8 J30  | 8,8 faible  | 170,7664835 | 178,38788 | 7,10165 | 121,55152 | 895,34853  | 125,94952 | 12,17445 |
| 2014 Drome | DE14 | ValaurieS | 8 J30  | 8,8 faible  | 160,525641  | 210,36364 | 6,70536 | 119,21818 | 1275,40904 | 129,17725 | 11,61630 |
| 2014 Drome | DE14 | ValaurieS | 8 J30  | 8,8 faible  | 129,5815018 | NA        | 7,15385 | 110,28485 | 1597,31002 | 121,74777 | 10,95284 |
| 2014 Drome | DE14 | ValaurieS | 8 J30  | 8,8 faible  | 160,706044  | NA        | NA      | 114,54848 | NA         | 124,34115 | 9,34684  |
| 2014 Drome | DE14 | ValaurieS | 10 J30 | 11,0 faible | 126,3832418 | 88,19394  | 6,27953 | 122,09091 | 2358,57951 | 123,73076 | 9,51832  |
| 2014 Drome | DE14 | ValaurieS | 10 J30 | 11,0 faible | 118,6034799 | 120,78788 | 5,94643 | 126,21212 | 1832,43479 | 121,83398 | 9,42651  |
| 2014 Drome | DE14 | ValaurieS | 10 J30 | 11,0 faible | 141,8992674 | 85,62424  | 6,70215 | 126,29697 | 1971,41624 | 122,89175 | 9,77335  |
| 2014 Drome | DE14 | ValaurieS | 10 J30 | 11,0 faible | 149,8983516 | 107,83434 | 5,53571 | 114,98182 | 2385,20514 | 105,70900 | 9,28480  |
| 2014 Drome | DE14 | ValaurieS | 10 J30 | 11,0 faible | 134,6575092 | 104,72727 | 6,00298 | 117,87273 | 1706,07736 | 107,45085 | 5,89560  |
| 2014 Drome | DE14 | ValaurieS | 10 J30 | 11,0 faible | 133,9771062 | 104,62222 | 6,64389 | 115,10303 | 1706,29375 | 111,57702 | 4,30426  |
| 2014 Drome | DE14 | ValaurieS | 10 J30 | 11,0 faible | 122,1034799 | 125,58384 | 5,59020 | 109,85758 | 1752,65763 | 115,43414 | 5,11538  |
| 2014 Drome | DE14 | ValaurieS | 10 J30 | 11,0 faible | 128,4935897 | 98,67273  | 7,00389 | 125,79394 | 2077,38901 | 93,17657  | 8,04808  |
| 2014 Drome | DE14 | ValaurieS | 10 J30 | 11,0 faible | 71,42582418 | 113,47879 | 4,39515 | 98,46061  | 2008,34205 | 108,05259 | 6,74267  |
| 2014 Drome | DE14 | ValaurieS | 10 J30 | 11,0 faible | 70,56043956 | NA        | 5,23283 | 109,27273 | 1824,08591 | 113,10972 | NA       |
| 2014 Drome | DE14 | ValaurieS | 4 J30  | 11,3 faible | 84,11080586 | 164,52525 | 5,95776 | 102,69091 | 1749,99291 | 126,80761 | 9,04396  |
| 2014 Drome | DE14 | ValaurieS | 4 J30  | 11,3 faible | 103,2380952 | 182,73131 | 5,57761 | 109,48485 | 1335,76408 | 117,84071 | 6,08883  |
| 2014 Drome | DE14 | ValaurieS | 4 J30  | 11,3 faible | 75,84615385 | 103,05455 | 6,35955 | 101,72121 | 1810,69031 | 131,88619 | 5,16163  |
| 2014 Drome | DE14 | ValaurieS | 4 J30  | 11,3 faible | 117,5659341 | 133,66869 | 5,54773 | 102,83939 | 1368,70156 | 127,49377 | 8,75618  |
| 2014 Drome | DE14 | ValaurieS | 4 J30  | 11,3 faible | 105,7161172 | 115,39394 | 5,57006 | 99,15758  | 1726,68351 | 124,99617 | 3,78777  |
| 2014 Drome | DE14 | ValaurieS | 4 J30  | 11,3 faible | 108,7706044 | 167,76970 | 6,72184 | 97,39394  | 1271,54579 | 113,16599 | 6,81937  |
| 2014 Drome | DE14 | ValaurieS | 4 J30  | 11,3 faible | 106,3507326 | 234,15152 | 5,40202 | 96,22121  | 1482,14162 | 124,22424 | 6,43819  |
| 2014 Drome | DE14 | ValaurieS | 4 J30  | 11,3 faible | 102,7271062 | 135,72929 | NA      | 105,38182 | 1701,12049 | 127,84281 | NA       |
| 2014 Drome | DE14 | ValaurieS | 4 J30  | 11,3 faible | 77,33424908 | 201,96364 | NA      | 95,19394  | 1525,09911 | 118,16732 | NA       |
| 2014 Drome | DE14 | ValaurieS | 4 J30  | 11,3 faible | 76,503663   | 91,40606  | NA      | 88,66667  | 1204,42272 | 118,83865 | NA       |
| 2014 Drome | DE14 | ValaurieS | 19 J30 | 13,0 faible | 152,2985348 | 85,97172  | 7,50824 | 114,18182 | 1080,95636 | 95,63034  | 13,68269 |
| 2014 Drome | DE14 | ValaurieS | 19 J30 | 13,0 faible | 136,6565934 | 152,80404 | 7,75847 | 108,87273 | 1603,91231 | 96,40062  | 8,95604  |
| 2014 Drome | DE14 | ValaurieS | 19 J30 | 13,0 faible | 96,91941392 | 140,41212 | 7,24932 | 105,01818 | 1962,03892 | 97,42545  | 9,15316  |
| 2014 Drome | DE14 | ValaurieS | 19 J30 | 13,0 faible | 118,2673993 | 155,96364 | 6,49611 | 101,73939 | 1597,08904 | 97,92152  | 8,50183  |
| 2014 Drome | DE14 | ValaurieS | 19 J30 | 13,0 faible | 101,1025641 | 168,62222 | 6,33745 | 99,02424  | 2126,63914 | 89,76154  | 5,63255  |
| 2014 Drome | DE14 | ValaurieS | 19 J30 | 13,0 faible | 92,09065934 | 145,70909 | 7,21703 | 92,94545  | 1849,06948 | 78,14294  | 9,50412  |
| 2014 Drome | DE14 | ValaurieS | 19 J30 | 13,0 faible | 124,8095238 | 146,08081 | 8,00927 | 108,86061 | 1419,30431 | 87,16982  | 8,29670  |
| 2014 Drome | DE14 | ValaurieS | 19 J30 | 13,0 faible | 106,4249084 | 175,68485 | 7,43029 | 113,58788 | 1823,49061 | 97,00812  | 8,23077  |
| 2014 Drome | DE14 | ValaurieS | 19 J30 | 13,0 faible | 147,1492674 | 133,07879 | 7,35783 | 113,98788 | 1790,34079 | 101,89747 | NA       |
| 2014 Drome | DE14 | ValaurieS | 19 J30 | 13,0 faible | 97,13827839 | 144,13737 | NA      | 104,61212 | 1972,69727 | 102,07389 | NA       |
| 2014 Drome | DE14 | ValaurieS | 9 J30  | 13,8 faible | 148,5347985 | 167,19596 | 7,98524 | 117,13939 | 1346,21368 | 112,28504 | 2,28571  |
| 2014 Drome | DE14 | ValaurieS | 9 J30  | 13,8 faible | 174,4194139 | 139,03636 | 8,84272 | 119,79394 | 1334,71179 | 107,07341 | 6,33333  |
| 2014 Drome | DE14 | ValaurieS | 9 J30  | 13,8 faible | 141,9404762 | 145,58788 | 7,10737 | 110,16970 | 1768,38032 | 116,89349 | 8,23214  |
| 2014 Drome | DE14 | ValaurieS | 9 J30  | 13,8 faible | 159,5631868 | 176,81616 | 6,98237 | 114,60606 | 1202,09082 | 111,00717 | 5,21360  |

|            |      |           |        |             |             |           |         |           |            |           |          |
|------------|------|-----------|--------|-------------|-------------|-----------|---------|-----------|------------|-----------|----------|
| 2014 Drome | DE14 | ValaurieS | 9 J30  | 13,8 faible | 144,3479853 | 153,44646 | 8,47734 | 107,03636 | 1654,07782 | 110,48059 | 4,05288  |
| 2014 Drome | DE14 | ValaurieS | 9 J30  | 13,8 faible | 172,2051282 | 149,00000 | 8,35921 | 117,10303 | 1611,71397 | 116,06735 | 5,00069  |
| 2014 Drome | DE14 | ValaurieS | 9 J30  | 13,8 faible | 154,764652  | 149,92727 | 9,44712 | 113,36364 | 1260,27686 | 115,78936 | 4,66003  |
| 2014 Drome | DE14 | ValaurieS | 9 J30  | 13,8 faible | 163,0540293 | 188,88081 | 6,90156 | 124,21818 | 1566,72289 | 115,27872 | 7,51717  |
| 2014 Drome | DE14 | ValaurieS | 9 J30  | 13,8 faible | 114,0686813 | 153,66061 | 8,45570 | 95,58182  | 1253,65150 | 121,27459 | NA       |
| 2014 Drome | DE14 | ValaurieS | 9 J30  | 13,8 faible | 125,0512821 | NA        | NA      | 101,91515 | 1313,85323 | 120,21999 | NA       |
| 2014 Drome | DE14 | ValaurieS | 14 J30 | 22,1 forte  | 119,4771062 | 178,42424 | 6,49210 | 95,31515  | 1741,89079 | 105,37210 | 10,32005 |
| 2014 Drome | DE14 | ValaurieS | 14 J30 | 22,1 forte  | 104,7371795 | 221,50303 | 8,32624 | 99,61818  | 2334,16856 | 102,62777 | 10,16896 |
| 2014 Drome | DE14 | ValaurieS | 14 J30 | 22,1 forte  | 155,6886447 | 180,24848 | 7,77038 | 109,44848 | 2240,73930 | 96,26868  | 12,70788 |
| 2014 Drome | DE14 | ValaurieS | 14 J30 | 22,1 forte  | 149,4304029 | 214,14141 | 6,98352 | 115,33939 | 2028,19682 | 100,33234 | 9,97207  |
| 2014 Drome | DE14 | ValaurieS | 14 J30 | 22,1 forte  | 83,003663   | 171,64848 | 7,66930 | 94,16970  | 2408,50002 | 95,12074  | 10,28709 |
| 2014 Drome | DE14 | ValaurieS | 14 J30 | 22,1 forte  | 138,3388278 | 212,90909 | 5,57120 | 99,94545  | 2413,50752 | 106,27149 | 8,10302  |
| 2014 Drome | DE14 | ValaurieS | 14 J30 | 22,1 forte  | 174,0357143 | 235,74545 | 7,24267 | 102,06667 | 2266,47894 | 86,53138  | 6,64560  |
| 2014 Drome | DE14 | ValaurieS | 14 J30 | 22,1 forte  | 102,2225275 | 196,61818 | 8,19986 | 94,32727  | 2338,61815 | 99,51298  | 3,19162  |
| 2014 Drome | DE14 | ValaurieS | 14 J30 | 22,1 forte  | 148,771978  | 198,14141 | NA      | 95,28485  | 1280,72403 | 101,39571 | 7,21429  |
| 2014 Drome | DE14 | ValaurieS | 14 J30 | 22,1 forte  | 166,760989  | 179,11919 | NA      | 103,43030 | 2405,44434 | 105,59535 | 7,28434  |
| 2014 Drome | DE14 | ValaurieS | 20 J30 | 23,0 forte  | 129,4304029 | 120,32121 | 5,71978 | 109,46061 | 1747,17885 | 131,06070 | 8,68544  |
| 2014 Drome | DE14 | ValaurieS | 20 J30 | 23,0 forte  | 129,8727106 | 118,86061 | 6,43544 | 106,92121 | 2102,85284 | 124,39764 | 8,06868  |
| 2014 Drome | DE14 | ValaurieS | 20 J30 | 23,0 forte  | 164,3141026 | 122,74545 | 7,60337 | 122,92727 | 1524,94707 | 126,53446 | 9,67811  |
| 2014 Drome | DE14 | ValaurieS | 20 J30 | 23,0 forte  | 119,0421245 | 132,90909 | 5,55666 | 113,69091 | 1872,12861 | 132,15431 | 8,05128  |
| 2014 Drome | DE14 | ValaurieS | 20 J30 | 23,0 forte  | 156,0943223 | 131,76970 | 6,51007 | 113,03030 | 2212,18746 | 132,93449 | 7,55403  |
| 2014 Drome | DE14 | ValaurieS | 20 J30 | 23,0 forte  | 129,0869963 | 116,98990 | 7,40270 | 113,09091 | 1682,57074 | 123,60652 | 6,91529  |
| 2014 Drome | DE14 | ValaurieS | 20 J30 | 23,0 forte  | 125,96337   | 140,35758 | 6,77770 | 114,98182 | 1946,78939 | 137,41908 | 4,12637  |
| 2014 Drome | DE14 | ValaurieS | 20 J30 | 23,0 forte  | 128,2875458 | 101,26061 | 8,05426 | 119,87273 | 1817,29900 | 127,86308 | 9,26511  |
| 2014 Drome | DE14 | ValaurieS | 20 J30 | 23,0 forte  | 162,5137363 | 156,80808 | NA      | 124,33939 | 1954,19227 | 135,78701 | 11,51786 |
| 2014 Drome | DE14 | ValaurieS | 20 J30 | 23,0 forte  | 153,485348  | 129,13131 | NA      | 126,24848 | 1942,33187 | 126,86080 | NA       |
| 2014 Drome | DE14 | ValaurieS | 22 J30 | 23,7 forte  | 129,029304  | 198,70303 | 7,69471 | 117,87879 | 1590,70449 | 114,33273 | 9,48443  |
| 2014 Drome | DE14 | ValaurieS | 22 J30 | 23,7 forte  | 127,2985348 | 174,69091 | 8,34982 | 119,18788 | 1298,63659 | 125,89291 | 8,97619  |
| 2014 Drome | DE14 | ValaurieS | 22 J30 | 23,7 forte  | 138,5018315 | 227,70101 | 7,87844 | 123,17576 | 1231,91936 | 124,96896 | 8,58791  |
| 2014 Drome | DE14 | ValaurieS | 22 J30 | 23,7 forte  | 138,040293  | 204,20606 | 8,41094 | 122,57576 | 1316,06181 | 118,66284 | 7,49176  |
| 2014 Drome | DE14 | ValaurieS | 22 J30 | 23,7 forte  | 136,1877289 | 203,03636 | 7,89652 | 115,18182 | 1265,82523 | 120,11682 | 5,60096  |
| 2014 Drome | DE14 | ValaurieS | 22 J30 | 23,7 forte  | 141,5888278 | 213,54747 | 7,61081 | 114,09091 | 1109,04367 | 114,13624 | 7,11630  |
| 2014 Drome | DE14 | ValaurieS | 22 J30 | 23,7 forte  | 146,2124542 | 243,20404 | 7,93521 | 118,78788 | 1496,01840 | 113,00765 | 6,27015  |
| 2014 Drome | DE14 | ValaurieS | 22 J30 | 23,7 forte  | 141,96337   | 205,83030 | 7,85989 | 116,20606 | 912,10286  | 125,89482 | 5,70467  |
| 2014 Drome | DE14 | ValaurieS | 22 J30 | 23,7 forte  | 106,8992674 | 198,59394 | NA      | 113,93939 | 1668,16826 | 116,31339 | 6,76236  |
| 2014 Drome | DE14 | ValaurieS | 22 J30 | 23,7 forte  | 116,1913919 | 194,57374 | NA      | 110,36061 | NA         | 118,52089 | NA       |
| 2014 Drome | DE14 | ValaurieS | 11 J30 | 25,9 forte  | 118,6208791 | 157,23636 | 6,95089 | 115,40000 | 2025,63556 | 118,34385 | 4,18452  |
| 2014 Drome | DE14 | ValaurieS | 11 J30 | 25,9 forte  | 130,9986264 | 153,19394 | 6,91140 | 106,52424 | 2233,22233 | 125,64343 | 2,82005  |
| 2014 Drome | DE14 | ValaurieS | 11 J30 | 25,9 forte  | 160,2115385 | 195,97172 | 7,68681 | 120,94545 | 2310,35796 | 114,85988 | 4,80426  |
| 2014 Drome | DE14 | ValaurieS | 11 J30 | 25,9 forte  | 116,228022  | 140,66667 | 7,05243 | 115,00000 | 3193,84115 | 125,87086 | 3,53205  |
| 2014 Drome | DE14 | ValaurieS | 11 J30 | 25,9 forte  | 117,9532967 | 176,50505 | 6,75023 | 113,22424 | 1716,10100 | 113,85242 | 2,95673  |

|            |      |           |        |             |             |           |         |           |            |           |          |
|------------|------|-----------|--------|-------------|-------------|-----------|---------|-----------|------------|-----------|----------|
| 2014 Drome | DE14 | ValaurieS | 11 J30 | 25,9 forte  | 137,3598901 | 148,40606 | 6,78823 | 116,08788 | 2048,06363 | 103,25831 | 3,33745  |
| 2014 Drome | DE14 | ValaurieS | 11 J30 | 25,9 forte  | 140,2893773 | 178,47879 | 7,30334 | 105,55152 | 2211,35359 | 117,00127 | 3,98626  |
| 2014 Drome | DE14 | ValaurieS | 11 J30 | 25,9 forte  | 122,6712454 | 177,72121 | 8,12157 | 112,33939 | 2384,93877 | 122,81530 | 3,40797  |
| 2014 Drome | DE14 | ValaurieS | 11 J30 | 25,9 forte  | 138,1309524 | 150,87677 | 7,02953 | 105,02424 | 1805,31073 | 114,30451 | 3,29167  |
| 2014 Drome | DE14 | ValaurieS | 11 J30 | 25,9 forte  | 126,2967033 | 172,28687 | 6,72436 | 103,29091 | 2288,17533 | 109,85329 | 4,60623  |
| 2014 Drome | DE14 | ValaurieS | 16 J30 | 30,3 forte  | 119,6913919 | 160,18586 | 8,24382 | 116,15152 | 1834,20855 | 102,83064 | 5,33700  |
| 2014 Drome | DE14 | ValaurieS | 16 J30 | 30,3 forte  | 164,0815018 | 195,43434 | 8,94093 | 121,85455 | 1516,04095 | 112,95623 | 6,50755  |
| 2014 Drome | DE14 | ValaurieS | 16 J30 | 30,3 forte  | 87,23351648 | 147,63636 | 5,32074 | 105,98182 | 1959,04995 | 112,94288 | 7,82349  |
| 2014 Drome | DE14 | ValaurieS | 16 J30 | 30,3 forte  | 143,5961538 | 151,38788 | 7,45719 | 114,00000 | 1424,81938 | 113,29703 | 4,97573  |
| 2014 Drome | DE14 | ValaurieS | 16 J30 | 30,3 forte  | 125,2912088 | 168,48485 | 7,45570 | 119,67273 | 1588,20116 | 106,27911 | 8,74542  |
| 2014 Drome | DE14 | ValaurieS | 16 J30 | 30,3 forte  | 101,1575092 | 191,49495 | 5,60268 | 112,66364 | 1667,46198 | 103,63793 | 3,99725  |
| 2014 Drome | DE14 | ValaurieS | 16 J30 | 30,3 forte  | 115,2417582 | 175,67273 | 6,57120 | 116,46667 | 1670,45149 | 113,70057 | NA       |
| 2014 Drome | DE14 | ValaurieS | 16 J30 | 30,3 forte  | 115,8983516 | 185,49091 | 7,11584 | 114,75758 | 1783,20645 | 112,22669 | NA       |
| 2014 Drome | DE14 | ValaurieS | 16 J30 | 30,3 forte  | 124,1282051 | 159,81212 | 7,26946 | 111,61818 | 1555,05710 | 114,82880 | NA       |
| 2014 Drome | DE14 | ValaurieS | 16 J30 | 30,3 forte  | 146,8479853 | 258,00404 | 8,42514 | 124,86364 | 1514,03127 | 119,78133 | NA       |
| 2014 Drome | DG14 | Vinsobres | 15 J30 | 13,2 faible | 141,1117216 | 215,01818 | 6,49245 | 119,70909 | 1305,77215 | 124,17281 | 4,72459  |
| 2014 Drome | DG14 | Vinsobres | 15 J30 | 13,2 faible | 145,9642857 | 169,02222 | 7,27381 | 105,00000 | 1574,71410 | 122,11029 | 3,29258  |
| 2014 Drome | DG14 | Vinsobres | 15 J30 | 13,2 faible | 134,5659341 | 148,25051 | 6,61367 | 115,01818 | 1486,79485 | 128,67697 | 4,71429  |
| 2014 Drome | DG14 | Vinsobres | 15 J30 | 13,2 faible | 134,1217949 | 190,02424 | 7,76374 | 104,01818 | 1131,73993 | 116,14379 | 5,72184  |
| 2014 Drome | DG14 | Vinsobres | 15 J30 | 13,2 faible | 139,1327839 | 180,07273 | 7,81891 | 119,93333 | 1100,06540 | 132,74158 | 7,25137  |
| 2014 Drome | DG14 | Vinsobres | 15 J30 | 13,2 faible | 145,4532967 | 158,48889 | 6,61951 | 117,18182 | 1321,76070 | 134,10942 | 6,20742  |
| 2014 Drome | DG14 | Vinsobres | 15 J30 | 13,2 faible | 130,3351648 | 180,25455 | 7,61447 | 102,00000 | 1111,28998 | 120,45154 | 4,74084  |
| 2014 Drome | DG14 | Vinsobres | 15 J30 | 13,2 faible | 134,6199634 | 162,89697 | 6,92995 | 115,15455 | 1276,31983 | 124,48518 | NA       |
| 2014 Drome | DG14 | Vinsobres | 15 J30 | 13,2 faible | 108,0604396 | 156,04242 | 7,26168 | 115,19394 | 1182,60054 | 134,11860 | NA       |
| 2014 Drome | DG14 | Vinsobres | 15 J30 | 13,2 faible | 117,1227106 | NA        | NA      | 113,76364 | 1630,31180 | 132,85487 | NA       |
| 2014 Drome | DG14 | Vinsobres | 11 J30 | 16,6 faible | 108,9038462 | 169,89899 | 8,20742 | 115,06667 | 1245,19882 | 135,94545 | 4,27747  |
| 2014 Drome | DG14 | Vinsobres | 11 J30 | 16,6 faible | 111,3342491 | 165,10707 | 7,43361 | 103,07273 | 1646,30302 | 145,09475 | 3,78022  |
| 2014 Drome | DG14 | Vinsobres | 11 J30 | 16,6 faible | 109,3791209 | 156,16162 | 8,08219 | 118,08182 | 1696,61381 | 135,20162 | 4,60394  |
| 2014 Drome | DG14 | Vinsobres | 11 J30 | 16,6 faible | 104,5796703 | 161,33939 | 7,77438 | 112,65455 | 1456,22167 | 136,25785 | 6,75755  |
| 2014 Drome | DG14 | Vinsobres | 11 J30 | 16,6 faible | 93,67307692 | 128,58182 | 7,47299 | 113,46061 | 1156,90791 | 133,89179 | 4,63668  |
| 2014 Drome | DG14 | Vinsobres | 11 J30 | 16,6 faible | 106,5741758 | 136,69495 | 8,52988 | 107,12727 | 1240,58033 | 141,83480 | NA       |
| 2014 Drome | DG14 | Vinsobres | 11 J30 | 16,6 faible | 109,5714286 | 168,94545 | 7,08219 | 121,25455 | 1468,38691 | 124,67593 | NA       |
| 2014 Drome | DG14 | Vinsobres | 11 J30 | 16,6 faible | 90,3507326  | 160,07879 | 8,82486 | 113,78788 | 1397,17236 | 124,28572 | NA       |
| 2014 Drome | DG14 | Vinsobres | 11 J30 | 16,6 faible | 105,5824176 | 173,08687 | 8,41827 | 118,37273 | NA         | 131,19656 | NA       |
| 2014 Drome | DG14 | Vinsobres | 11 J30 | 16,6 faible | 108,1043956 | 164,33939 | NA      | 112,23636 | NA         | 120,30631 | NA       |
| 2014 Drome | DG14 | Vinsobres | 24 J30 | 18,0 faible | 108,7307692 | 193,64444 | 7,21841 | 95,78788  | 559,00052  | 141,93574 | 11,77839 |
| 2014 Drome | DG14 | Vinsobres | 24 J30 | 18,0 faible | 113,1071429 | 166,83030 | 6,82120 | 94,11515  | 547,71263  | 153,20022 | 9,89766  |
| 2014 Drome | DG14 | Vinsobres | 24 J30 | 18,0 faible | 77,80357143 | 187,10303 | 5,35886 | 95,47879  | 531,23887  | 152,72751 | 10,33745 |
| 2014 Drome | DG14 | Vinsobres | 24 J30 | 18,0 faible | 86,4496337  | 171,71313 | 5,89011 | 94,27879  | 822,01187  | 148,97982 | 13,04670 |
| 2014 Drome | DG14 | Vinsobres | 24 J30 | 18,0 faible | 80,49175824 | 199,88687 | 6,08551 | 97,65455  | 650,95733  | 141,19821 | 9,66277  |
| 2014 Drome | DG14 | Vinsobres | 24 J30 | 18,0 faible | 77,01739927 | 215,02626 | 6,23810 | 95,98788  | 632,60804  | 143,41978 | 9,17353  |



|            |      |           |        |             |             |           |         |           |            |           |          |
|------------|------|-----------|--------|-------------|-------------|-----------|---------|-----------|------------|-----------|----------|
| 2014 Drome | DG14 | Vinsobres | 24 J30 | 18,0 faible | 102,4954212 | 223,59192 | NA      | 103,44242 | 406,50384  | 158,11655 | 6,15797  |
| 2014 Drome | DG14 | Vinsobres | 24 J30 | 18,0 faible | 85,78296703 | 187,78586 | NA      | 97,28485  | 657,76336  | 114,65570 | 7,01832  |
| 2014 Drome | DG14 | Vinsobres | 24 J30 | 18,0 faible | 87,27930403 | 179,63232 | NA      | 102,63636 | 500,86696  | 144,83155 | 9,11538  |
| 2014 Drome | DG14 | Vinsobres | 24 J30 | 18,0 faible | 143,5558608 | 213,52323 | NA      | 99,92121  | NA         | 152,68258 | NA       |
| 2014 Drome | DG14 | Vinsobres | 21 J30 | 18,2 faible | 134,5897436 | 216,10101 | 7,30220 | 107,30909 | 807,72967  | 157,48200 | 9,59409  |
| 2014 Drome | DG14 | Vinsobres | 21 J30 | 18,2 faible | 102,7875458 | 188,06061 | 5,82658 | 101,46061 | 748,69252  | 149,17643 | 7,16071  |
| 2014 Drome | DG14 | Vinsobres | 21 J30 | 18,2 faible | 129,040293  | 222,39192 | 7,27335 | 109,83636 | 843,27687  | 143,44549 | 12,99954 |
| 2014 Drome | DG14 | Vinsobres | 21 J30 | 18,2 faible | 124,5567766 | 185,25253 | 6,12431 | 105,10303 | 644,11971  | 151,07333 | 12,15934 |
| 2014 Drome | DG14 | Vinsobres | 21 J30 | 18,2 faible | 132,532967  | 207,60000 | 7,40041 | 100,49697 | 930,47401  | 149,95314 | 9,58379  |
| 2014 Drome | DG14 | Vinsobres | 21 J30 | 18,2 faible | 121,1602564 | 254,51717 | 7,04304 | 112,09697 | 763,01272  | 153,45400 | 11,20192 |
| 2014 Drome | DG14 | Vinsobres | 21 J30 | 18,2 faible | 126,3736264 | 199,13939 | 6,69403 | 104,12121 | 718,54142  | 151,05044 | 8,56456  |
| 2014 Drome | DG14 | Vinsobres | 21 J30 | 18,2 faible | 122,3232601 | 318,96970 | 6,34066 | 111,29697 | NA         | 146,57230 | 8,92651  |
| 2014 Drome | DG14 | Vinsobres | 21 J30 | 18,2 faible | 134,4029304 | 192,34343 | 8,90591 | 109,65455 | NA         | 148,27039 | 10,42262 |
| 2014 Drome | DG14 | Vinsobres | 21 J30 | 18,2 faible | 145,1089744 | 208,00606 | NA      | 117,17576 | NA         | 146,98595 | 5,96772  |
| 2014 Drome | DG14 | Vinsobres | 18 J30 | 18,2 faible | 126,1172161 | 159,03030 | 6,98237 | 101,26061 | 852,17740  | 137,28043 | 8,65179  |
| 2014 Drome | DG14 | Vinsobres | 18 J30 | 18,2 faible | 120,7655678 | 164,35152 | 7,05289 | 100,98788 | 996,46878  | 140,62341 | 8,59203  |
| 2014 Drome | DG14 | Vinsobres | 18 J30 | 18,2 faible | 116,8928571 | 150,22222 | 9,09043 | 96,83636  | 1034,71541 | 153,22147 | 8,23832  |
| 2014 Drome | DG14 | Vinsobres | 18 J30 | 18,2 faible | 134,6565934 | 220,65455 | 7,48661 | 111,56970 | 1023,46680 | 133,75992 | 7,81731  |
| 2014 Drome | DG14 | Vinsobres | 18 J30 | 18,2 faible | 120,7600733 | 163,73333 | 7,03537 | 101,61818 | 1074,58777 | 143,44532 | 7,29899  |
| 2014 Drome | DG14 | Vinsobres | 18 J30 | 18,2 faible | 117,9249084 | 164,84444 | 7,44609 | 102,16970 | 833,79140  | 143,74109 | 8,25893  |
| 2014 Drome | DG14 | Vinsobres | 18 J30 | 18,2 faible | 107,2074176 | 186,80000 | 8,63153 | 96,46061  | 957,24114  | 143,89994 | 6,66484  |
| 2014 Drome | DG14 | Vinsobres | 18 J30 | 18,2 faible | 121,8241758 | 172,27475 | NA      | 99,58182  | 832,56052  | 136,41616 | NA       |
| 2014 Drome | DG14 | Vinsobres | 18 J30 | 18,2 faible | 106,1217949 | 182,93939 | NA      | 103,98182 | 1108,91236 | 148,24248 | NA       |
| 2014 Drome | DG14 | Vinsobres | 18 J30 | 18,2 faible | 118,7637363 | NA        | NA      | NA        | 934,05003  | 150,14521 | NA       |
| 2014 Drome | DG14 | Vinsobres | 20 J30 | 24,3 forte  | 126,8965201 | 179,60000 | 8,10737 | 125,01212 | 467,55647  | 141,56739 | 8,91346  |
| 2014 Drome | DG14 | Vinsobres | 20 J30 | 24,3 forte  | 113,5357143 | 206,82424 | 8,28159 | 115,49697 | 695,84888  | 121,23981 | 8,53480  |
| 2014 Drome | DG14 | Vinsobres | 20 J30 | 24,3 forte  | 88,23626374 | 177,84242 | 7,90476 | 115,50909 | 840,65567  | 140,39890 | 8,38049  |
| 2014 Drome | DG14 | Vinsobres | 20 J30 | 24,3 forte  | 83,33791209 | 149,99394 | 6,72940 | 109,09697 | 548,15139  | 144,75808 | 6,69712  |
| 2014 Drome | DG14 | Vinsobres | 20 J30 | 24,3 forte  | 109,7637363 | 207,13535 | 7,62638 | 124,40000 | 949,01827  | 149,91625 | 5,99542  |
| 2014 Drome | DG14 | Vinsobres | 20 J30 | 24,3 forte  | 94,02930403 | 218,50303 | 9,76877 | 114,93939 | 654,44326  | 146,61047 | 5,28663  |
| 2014 Drome | DG14 | Vinsobres | 20 J30 | 24,3 forte  | 99,01282051 | 245,35758 | NA      | 114,73333 | 616,40608  | 146,40829 | 7,24588  |
| 2014 Drome | DG14 | Vinsobres | 20 J30 | 24,3 forte  | 114,2472527 | 138,29091 | NA      | 136,07273 | 690,60466  | 141,26994 | 7,90316  |
| 2014 Drome | DG14 | Vinsobres | 20 J30 | 24,3 forte  | 104,6648352 | 149,41818 | NA      | 118,35758 | NA         | 138,32867 | 8,91003  |
| 2014 Drome | DG14 | Vinsobres | 20 J30 | 24,3 forte  | 102,6153846 | 186,86061 | NA      | 110,29091 | NA         | 141,70913 | 6,78571  |
| 2014 Drome | DG14 | Vinsobres | 5 J30  | 27,8 forte  | 128,724359  | 128,14141 | 8,58929 | 126,82727 | 1721,75764 | 163,78410 | 5,53297  |
| 2014 Drome | DG14 | Vinsobres | 5 J30  | 27,8 forte  | 129,242674  | 177,72727 | 8,07418 | 132,99394 | 1940,62585 | 162,51673 | 10,16117 |
| 2014 Drome | DG14 | Vinsobres | 5 J30  | 27,8 forte  | 128,2774725 | 178,68485 | 8,12889 | 126,15152 | 1687,12249 | 160,60029 | 6,63462  |
| 2014 Drome | DG14 | Vinsobres | 5 J30  | 27,8 forte  | 117,5686813 | 146,08485 | 8,66369 | 114,56364 | 1343,13158 | 152,76399 | 6,05311  |
| 2014 Drome | DG14 | Vinsobres | 5 J30  | 27,8 forte  | 134,3369963 | 212,18182 | 9,29899 | 133,72727 | 1590,82076 | 157,56914 | 10,28938 |
| 2014 Drome | DG14 | Vinsobres | 5 J30  | 27,8 forte  | 129,5769231 | 167,65455 | 7,01740 | 116,62424 | 1604,47363 | 168,17928 | 6,38049  |
| 2014 Drome | DG14 | Vinsobres | 5 J30  | 27,8 forte  | 129,8278388 | 170,54141 | 8,12775 | 118,62727 | 1646,64944 | 166,08256 | 4,89515  |

|                 |      |           |        |            |             |           |         |           |            |           |          |
|-----------------|------|-----------|--------|------------|-------------|-----------|---------|-----------|------------|-----------|----------|
| 2014 Drome      | DG14 | Vinsobres | 5 J30  | 27,8 forte | 121,8131868 | 121,15152 | 7,65625 | 120,76364 | 1539,39277 | 159,46321 | 7,44048  |
| 2014 Drome      | DG14 | Vinsobres | 5 J30  | 27,8 forte | 82,70238095 | 195,04242 | 5,78709 | 115,35152 | 1464,10485 | 153,53309 | 8,09066  |
| 2014 Drome      | DG14 | Vinsobres | 5 J30  | 27,8 forte | 79,7014652  | 163,11515 | NA      | 103,30000 | NA         | 161,90189 | NA       |
| 2014 Drome      | DG14 | Vinsobres | 13 J30 | 28,0 forte | 97,10531136 | 149,20000 | 7,21463 | 110,19091 | 474,17617  | 150,34576 | 4,00824  |
| 2014 Drome      | DG14 | Vinsobres | 13 J30 | 28,0 forte | 84,17399267 | 154,88485 | 4,67548 | 101,40000 | 824,11062  | 165,00328 | 3,89789  |
| 2014 Drome      | DG14 | Vinsobres | 13 J30 | 28,0 forte | 101,757326  | 164,14545 | 7,67102 | 105,09091 | 678,89144  | 157,37466 | 4,08997  |
| 2014 Drome      | DG14 | Vinsobres | 13 J30 | 28,0 forte | 66,58608059 | 165,64040 | 7,00172 | 119,70303 | 979,74207  | 165,88545 | 5,01786  |
| 2014 Drome      | DG14 | Vinsobres | 13 J30 | 28,0 forte | 60,24084249 | 234,57374 | 5,27954 | 110,93333 | 937,99503  | 155,10860 | 2,92353  |
| 2014 Drome      | DG14 | Vinsobres | 13 J30 | 28,0 forte | 61,85164835 | 118,18182 | 6,06937 | 96,45455  | 785,32578  | 151,55887 | 5,23672  |
| 2014 Drome      | DG14 | Vinsobres | 13 J30 | 28,0 forte | 63,93223443 | 159,96768 | 5,76408 | 98,32727  | 813,58570  | 149,56915 | 5,11882  |
| 2014 Drome      | DG14 | Vinsobres | 13 J30 | 28,0 forte | 81,20604396 | 161,96768 | 6,51030 | 101,85455 | 873,48990  | 144,72450 | 6,40797  |
| 2014 Drome      | DG14 | Vinsobres | 13 J30 | 28,0 forte | 68,23763736 | 180,70303 | 7,88359 | 100,46667 | 676,45652  | 146,07511 | 2,14973  |
| 2014 Drome      | DG14 | Vinsobres | 13 J30 | 28,0 forte | NA          | 138,36364 | NA      | 91,01212  | 905,92690  | NA        | NA       |
| 2014 Drome      | DG14 | Vinsobres | 1 J30  | 30,9 forte | 122,5018315 | 171,17172 | 8,19185 | 111,91515 | 1525,72517 | 91,92916  | 4,87019  |
| 2014 Drome      | DG14 | Vinsobres | 1 J30  | 30,9 forte | 117,0247253 | 136,16364 | 8,26374 | 106,41818 | 1482,49064 | 90,66875  | 6,79052  |
| 2014 Drome      | DG14 | Vinsobres | 1 J30  | 30,9 forte | 103,0970696 | 140,93939 | 8,18888 | 108,52121 | 2204,00699 | 93,36441  | 5,32418  |
| 2014 Drome      | DG14 | Vinsobres | 1 J30  | 30,9 forte | 115,7857143 | 186,95152 | 7,06559 | 112,23939 | 1282,66042 | 97,81405  | 5,94231  |
| 2014 Drome      | DG14 | Vinsobres | 1 J30  | 30,9 forte | 89,21886447 | 163,90303 | 7,84524 | 108,73030 | 2087,25582 | 94,01839  | 4,82189  |
| 2014 Drome      | DG14 | Vinsobres | 1 J30  | 30,9 forte | 120,1959707 | 146,24646 | 7,88118 | 100,57576 | 1841,40205 | 90,82386  | 3,37363  |
| 2014 Drome      | DG14 | Vinsobres | 1 J30  | 30,9 forte | 116,6804029 | 129,54545 | 8,65797 | 114,30303 | 1679,65388 | 94,56342  | NA       |
| 2014 Drome      | DG14 | Vinsobres | 1 J30  | 30,9 forte | 103,2893773 | 150,51717 | 7,45845 | 114,04242 | 1843,08487 | 97,14665  | NA       |
| 2014 Drome      | DG14 | Vinsobres | 1 J30  | 30,9 forte | 111,8223443 | 162,49091 | NA      | 105,51212 | NA         | 93,97713  | NA       |
| 2014 Drome      | DG14 | Vinsobres | 1 J30  | 30,9 forte | 94,47527473 | 135,71515 | NA      | NA        | NA         | NA        | NA       |
| 2014 Drome      | DG14 | Vinsobres | 9 J30  | 37,8 forte | 130,0302198 | 135,37374 | 7,75859 | 113,23636 | 1130,85023 | 91,59026  | 5,94780  |
| 2014 Drome      | DG14 | Vinsobres | 9 J30  | 37,8 forte | 130,7655678 | 112,05455 | 7,79190 | 113,20606 | 1255,85839 | 92,73666  | 6,33654  |
| 2014 Drome      | DG14 | Vinsobres | 9 J30  | 37,8 forte | 150,6556777 | 150,93333 | 8,74886 | 117,67879 | 1418,90646 | 89,45811  | 6,25641  |
| 2014 Drome      | DG14 | Vinsobres | 9 J30  | 37,8 forte | 156,2344322 | 128,97374 | 9,08402 | 112,03030 | 1351,65845 | 91,69981  | 5,42033  |
| 2014 Drome      | DG14 | Vinsobres | 9 J30  | 37,8 forte | 138,3882784 | 167,53939 | 8,64927 | 113,42424 | 1255,78920 | 95,30516  | 4,77747  |
| 2014 Drome      | DG14 | Vinsobres | 9 J30  | 37,8 forte | 134,2399267 | 128,33131 | 7,89011 | 120,31212 | 1577,33567 | 90,02988  | NA       |
| 2014 Drome      | DG14 | Vinsobres | 9 J30  | 37,8 forte | 144,9377289 | 132,50909 | 9,39938 | 119,75152 | 1131,27963 | 90,05503  | NA       |
| 2014 Drome      | DG14 | Vinsobres | 9 J30  | 37,8 forte | 132,485348  | 147,15152 | 7,90728 | 112,70303 | 1541,04950 | 90,31458  | NA       |
| 2014 Drome      | DG14 | Vinsobres | 9 J30  | 37,8 forte | 153,489011  | 170,41212 | 8,09730 | 118,46667 | 956,99185  | 92,21963  | NA       |
| 2014 Drome      | DG14 | Vinsobres | 9 J30  | 37,8 forte | 101,5750916 | NA        | NA      | 106,37576 | 1252,90835 | 86,38477  | NA       |
| 2014 LureAlbion | LK14 | StTrinit  | 23 J30 | 3,6 faible | 159,8021978 | 182,73939 | 9,00309 | 115,26667 | 1277,37038 | 75,69037  | 8,15865  |
| 2014 LureAlbion | LK14 | StTrinit  | 23 J30 | 3,6 faible | 139,0769231 | 141,93535 | 7,97550 | 111,25455 | 1352,99794 | 79,84640  | 9,19826  |
| 2014 LureAlbion | LK14 | StTrinit  | 23 J30 | 3,6 faible | 137,1172161 | 160,05253 | 8,28571 | 110,37576 | 904,11006  | 82,51549  | 10,98168 |
| 2014 LureAlbion | LK14 | StTrinit  | 23 J30 | 3,6 faible | 106,9569597 | 169,81818 | 7,96658 | 114,81818 | 1559,81610 | 77,93288  | 11,29945 |
| 2014 LureAlbion | LK14 | StTrinit  | 23 J30 | 3,6 faible | 109,5641026 | 149,21818 | 9,20147 | 107,66061 | 1102,38181 | 83,84553  | 9,94643  |
| 2014 LureAlbion | LK14 | StTrinit  | 23 J30 | 3,6 faible | 147,217033  | 170,72323 | 7,65270 | 117,21212 | 655,11955  | 75,58602  | 7,04945  |
| 2014 LureAlbion | LK14 | StTrinit  | 23 J30 | 3,6 faible | 139,293956  | 184,80000 | 8,33173 | 113,02121 | 1227,07674 | 73,29490  | NA       |
| 2014 LureAlbion | LK14 | StTrinit  | 23 J30 | 3,6 faible | 125,3663004 | 183,37374 | 9,78137 | 109,53939 | 902,06652  | 83,10715  | NA       |

|      |            |      |          |    |     |     |        |             |           |         |           |            |           |          |
|------|------------|------|----------|----|-----|-----|--------|-------------|-----------|---------|-----------|------------|-----------|----------|
| 2014 | LureAlbion | LK14 | StTrinit | 23 | J30 | 3,6 | faible | 136,4917582 | 150,40808 | 8,36848 | 122,58182 | NA         | 77,55349  | NA       |
| 2014 | LureAlbion | LK14 | StTrinit | 23 | J30 | 3,6 | faible | 125,1382784 | 140,93737 | NA      | 104,71212 | NA         | 77,78859  | NA       |
| 2014 | LureAlbion | LK14 | StTrinit | 21 | J30 | 4,2 | faible | 123,720696  | 180,52929 | 5,52163 | 78,67273  | 1024,74595 | 96,81074  | 13,78984 |
| 2014 | LureAlbion | LK14 | StTrinit | 21 | J30 | 4,2 | faible | 118,4606227 | 212,30303 | 5,54327 | 79,81212  | 1081,94259 | 109,06240 | 15,59272 |
| 2014 | LureAlbion | LK14 | StTrinit | 21 | J30 | 4,2 | faible | 83,76098901 | 146,93333 | 5,26374 | 95,25455  | 1279,17819 | 100,54496 | 11,31822 |
| 2014 | LureAlbion | LK14 | StTrinit | 21 | J30 | 4,2 | faible | 90,67307692 | 172,39394 | 5,56983 | 90,89091  | 1131,03016 | 107,20911 | 9,76694  |
| 2014 | LureAlbion | LK14 | StTrinit | 21 | J30 | 4,2 | faible | 95,51373626 | 199,26869 | 5,15934 | 86,73939  | 993,36167  | 109,10087 | 9,91964  |
| 2014 | LureAlbion | LK14 | StTrinit | 21 | J30 | 4,2 | faible | 91,37454212 | 196,96566 | 5,05792 | 84,81212  | 1311,97008 | 98,39709  | 11,66964 |
| 2014 | LureAlbion | LK14 | StTrinit | 21 | J30 | 4,2 | faible | 89,6978022  | 144,63636 | 5,34169 | 93,63636  | 963,99445  | 108,11817 | NA       |
| 2014 | LureAlbion | LK14 | StTrinit | 21 | J30 | 4,2 | faible | 92,55494505 | 130,38182 | 5,66964 | 94,99394  | 1074,41406 | 102,04193 | NA       |
| 2014 | LureAlbion | LK14 | StTrinit | 21 | J30 | 4,2 | faible | 92,79212454 | NA        | 5,84032 | 84,30303  | 1374,51226 | 100,27367 | NA       |
| 2014 | LureAlbion | LK14 | StTrinit | 21 | J30 | 4,2 | faible | 132,1565934 | NA        | NA      | NA        | NA         | 110,97556 | NA       |
| 2014 | LureAlbion | LK14 | StTrinit | 1  | J30 | 4,3 | faible | 132,6538462 | 141,60000 | 5,85371 | 102,77576 | 611,84883  | 93,22081  | 8,62225  |
| 2014 | LureAlbion | LK14 | StTrinit | 1  | J30 | 4,3 | faible | 109,8672161 | 134,21818 | 6,27541 | 104,77576 | 1362,07581 | 100,99464 | 6,81090  |
| 2014 | LureAlbion | LK14 | StTrinit | 1  | J30 | 4,3 | faible | 140,5787546 | 98,66667  | 6,50710 | 105,94545 | 1001,03307 | 97,40419  | 8,87729  |
| 2014 | LureAlbion | LK14 | StTrinit | 1  | J30 | 4,3 | faible | 118,1968864 | 114,09293 | 5,84226 | 100,12727 | 829,94955  | 97,12826  | 8,05357  |
| 2014 | LureAlbion | LK14 | StTrinit | 1  | J30 | 4,3 | faible | 129,8159341 | 69,27273  | 6,17274 | 105,86061 | 808,03792  | 99,13793  | 5,55449  |
| 2014 | LureAlbion | LK14 | StTrinit | 1  | J30 | 4,3 | faible | 123,6849817 | 123,03030 | 5,77381 | 101,10303 | 981,48779  | 100,08109 | 10,07143 |
| 2014 | LureAlbion | LK14 | StTrinit | 1  | J30 | 4,3 | faible | 108,2857143 | 131,95758 | 5,41381 | 101,03030 | 1217,12655 | 97,96146  | 11,81502 |
| 2014 | LureAlbion | LK14 | StTrinit | 1  | J30 | 4,3 | faible | 122,9322344 | NA        | NA      | 98,83939  | 1177,46470 | 90,11959  | 9,72161  |
| 2014 | LureAlbion | LK14 | StTrinit | 1  | J30 | 4,3 | faible | 105,6446886 | NA        | NA      | 100,49091 | 975,54895  | 95,73586  | 6,61676  |
| 2014 | LureAlbion | LK14 | StTrinit | 1  | J30 | 4,3 | faible | 94,1043956  | NA        | NA      | 106,33333 | 1276,35528 | 98,43389  | 8,29739  |
| 2014 | LureAlbion | LK14 | StTrinit | 15 | J30 | 5,3 | faible | 105,5357143 | 193,76566 | 7,04419 | 108,32121 | 1452,22112 | 101,31629 | 6,86951  |
| 2014 | LureAlbion | LK14 | StTrinit | 15 | J30 | 5,3 | faible | 107,5265568 | 142,96970 | 7,28595 | 109,77576 | 999,12714  | 104,33557 | 8,15385  |
| 2014 | LureAlbion | LK14 | StTrinit | 15 | J30 | 5,3 | faible | 109,0705128 | 129,20606 | 6,28434 | 104,38788 | 920,33135  | 106,25514 | 11,06639 |
| 2014 | LureAlbion | LK14 | StTrinit | 15 | J30 | 5,3 | faible | 106,3846154 | 206,08889 | 7,56090 | 101,30909 | 1381,21348 | 100,41574 | 10,21520 |
| 2014 | LureAlbion | LK14 | StTrinit | 15 | J30 | 5,3 | faible | 113,8598901 | 180,75960 | 6,83242 | 99,29394  | 1273,80028 | 108,50207 | 7,65522  |
| 2014 | LureAlbion | LK14 | StTrinit | 15 | J30 | 5,3 | faible | 118,6208791 | 119,61818 | 6,48626 | 105,89091 | 1107,19039 | 107,46974 | 7,58997  |
| 2014 | LureAlbion | LK14 | StTrinit | 15 | J30 | 5,3 | faible | 111,4139194 | 205,27879 | 6,93384 | 89,15758  | 1117,02769 | 101,90067 | 8,54602  |
| 2014 | LureAlbion | LK14 | StTrinit | 15 | J30 | 5,3 | faible | 103,0238095 | 163,07071 | NA      | 100,84242 | 1230,88822 | 103,85274 | NA       |
| 2014 | LureAlbion | LK14 | StTrinit | 15 | J30 | 5,3 | faible | 105,3479853 | 114,35152 | NA      | 93,12121  | 1010,48222 | 97,72267  | NA       |
| 2014 | LureAlbion | LK14 | StTrinit | 15 | J30 | 5,3 | faible | 68,81868132 | NA        | NA      | NA        | 1123,08583 | 97,99772  | NA       |
| 2014 | LureAlbion | LK14 | StTrinit | 12 | J30 | 5,7 | faible | 113,6666667 | 181,05859 | 7,82280 | 102,70303 | 1123,93136 | 107,05249 | 10,40568 |
| 2014 | LureAlbion | LK14 | StTrinit | 12 | J30 | 5,7 | faible | 109,8653846 | 123,58788 | 7,95055 | 97,92121  | 763,35303  | 100,20405 | 9,64469  |
| 2014 | LureAlbion | LK14 | StTrinit | 12 | J30 | 5,7 | faible | 91,5467033  | 199,41818 | 6,39423 | 96,90303  | 715,17879  | 109,82397 | 12,27198 |
| 2014 | LureAlbion | LK14 | StTrinit | 12 | J30 | 5,7 | faible | 82,35714286 | 164,18182 | 5,65763 | 94,43030  | 1211,14750 | 105,66149 | 8,78984  |
| 2014 | LureAlbion | LK14 | StTrinit | 12 | J30 | 5,7 | faible | 94,12728938 | 194,46061 | 6,12191 | 101,24848 | 856,63321  | 107,58831 | 8,97871  |
| 2014 | LureAlbion | LK14 | StTrinit | 12 | J30 | 5,7 | faible | 102,5650183 | 180,05657 | 5,18956 | 96,97879  | 1012,25036 | 110,87838 | 7,36493  |
| 2014 | LureAlbion | LK14 | StTrinit | 12 | J30 | 5,7 | faible | 104,9697802 | 177,62020 | 8,50378 | 104,76364 | 721,97170  | 107,76007 | 7,62775  |
| 2014 | LureAlbion | LK14 | StTrinit | 12 | J30 | 5,7 | faible | 98,73901099 | 135,08485 | NA      | 115,61515 | 695,14846  | 110,29337 | 7,59821  |
| 2014 | LureAlbion | LK14 | StTrinit | 12 | J30 | 5,7 | faible | 84,91117216 | 207,09091 | NA      | 105,11515 | 925,84235  | 104,88381 | 9,63668  |

|      |            |      |          |    |     |            |             |           |         |           |            |           |          |
|------|------------|------|----------|----|-----|------------|-------------|-----------|---------|-----------|------------|-----------|----------|
| 2014 | LureAlbion | LK14 | StTrinit | 12 | J30 | 5,7 faible | 149,8434066 | NA        | NA      | 112,54545 | NA         | 109,41363 | NA       |
| 2014 | LureAlbion | LK14 | StTrinit | 22 | J30 | 11,8 forte | 131,3223443 | 141,37576 | 7,58345 | 98,63333  | 987,80674  | 109,48631 | 12,64240 |
| 2014 | LureAlbion | LK14 | StTrinit | 22 | J30 | 11,8 forte | 128,952381  | 163,45455 | 7,27026 | 102,63333 | 1275,43918 | 119,69509 | 8,84020  |
| 2014 | LureAlbion | LK14 | StTrinit | 22 | J30 | 11,8 forte | 133,9569597 | 159,42222 | 6,45261 | 108,81212 | 1186,21800 | 118,72822 | 11,59524 |
| 2014 | LureAlbion | LK14 | StTrinit | 22 | J30 | 11,8 forte | 118,5027473 | 146,61212 | 6,37729 | 101,31515 | 1052,85868 | 112,12831 | 11,46886 |
| 2014 | LureAlbion | LK14 | StTrinit | 22 | J30 | 11,8 forte | 149,9010989 | 122,73333 | 7,16896 | 104,26667 | 1343,18244 | 118,96540 | 8,67308  |
| 2014 | LureAlbion | LK14 | StTrinit | 22 | J30 | 11,8 forte | 130,6282051 | 177,79394 | 5,80311 | 104,56364 | 1212,85703 | 112,82877 | 9,71703  |
| 2014 | LureAlbion | LK14 | StTrinit | 22 | J30 | 11,8 forte | 144,9569597 | 193,65253 | 5,95914 | 104,66061 | 1172,98727 | 111,40250 | 13,07097 |
| 2014 | LureAlbion | LK14 | StTrinit | 22 | J30 | 11,8 forte | 116,8809524 | 148,44040 | 5,52061 | 91,95152  | 851,81183  | 115,85337 | 7,11676  |
| 2014 | LureAlbion | LK14 | StTrinit | 22 | J30 | 11,8 forte | 91,71703297 | 173,30303 | NA      | 93,93939  | 796,57806  | 114,75335 | 10,03846 |
| 2014 | LureAlbion | LK14 | StTrinit | 22 | J30 | 11,8 forte | 82,11904762 | 176,94141 | NA      | 92,51515  | 1048,48436 | 110,15485 | 10,45284 |
| 2014 | LureAlbion | LK14 | StTrinit | 5  | J30 | 11,9 forte | 84,47710623 | 153,74949 | 5,08104 | 85,51515  | 1571,36996 | 110,42221 | 9,50916  |
| 2014 | LureAlbion | LK14 | StTrinit | 5  | J30 | 11,9 forte | 84,03296703 | 194,94141 | 5,87317 | 98,70606  | 1212,12493 | 117,75555 | 10,29190 |
| 2014 | LureAlbion | LK14 | StTrinit | 5  | J30 | 11,9 forte | 72,96428571 | 163,02222 | 5,28800 | 95,17576  | 1140,24782 | 113,89018 | 8,21886  |
| 2014 | LureAlbion | LK14 | StTrinit | 5  | J30 | 11,9 forte | 98,67307692 | 124,28687 | 6,47081 | 91,36061  | 1129,43173 | 109,99300 | 9,17811  |
| 2014 | LureAlbion | LK14 | StTrinit | 5  | J30 | 11,9 forte | 76,33516484 | 97,14747  | 5,84444 | 88,61818  | 1098,86803 | 106,34502 | 12,64629 |
| 2014 | LureAlbion | LK14 | StTrinit | 5  | J30 | 11,9 forte | 76,10164835 | 120,75152 | 5,32727 | 82,21212  | 976,61381  | 103,64435 | 10,95330 |
| 2014 | LureAlbion | LK14 | StTrinit | 5  | J30 | 11,9 forte | 70,3992674  | 191,35354 | NA      | 97,23636  | 1030,78843 | 108,11875 | 6,94986  |
| 2014 | LureAlbion | LK14 | StTrinit | 5  | J30 | 11,9 forte | 65,9029304  | 145,24040 | NA      | 95,09091  | 1436,91640 | 108,64336 | 7,83608  |
| 2014 | LureAlbion | LK14 | StTrinit | 5  | J30 | 11,9 forte | 90,92948718 | NA        | NA      | 96,67273  | 1458,79981 | 103,78645 | 12,97436 |
| 2014 | LureAlbion | LK14 | StTrinit | 5  | J30 | 11,9 forte | 72,24542125 | NA        | NA      | 81,93333  | NA         | 110,37085 | 9,33745  |
| 2014 | LureAlbion | LK14 | StTrinit | 9  | J30 | 12,4 forte | 139,5952381 | 150,09697 | 7,10577 | 96,07273  | 1087,44833 | 88,55641  | 12,08516 |
| 2014 | LureAlbion | LK14 | StTrinit | 9  | J30 | 12,4 forte | 138,8507326 | 147,35354 | 6,79327 | 90,90909  | 1142,54646 | 89,93318  | 10,45055 |
| 2014 | LureAlbion | LK14 | StTrinit | 9  | J30 | 12,4 forte | 111,2847985 | 137,52323 | 6,51374 | 94,00606  | 901,50065  | 93,25886  | 7,92628  |
| 2014 | LureAlbion | LK14 | StTrinit | 9  | J30 | 12,4 forte | 101,5238095 | 150,13333 | 6,48111 | 93,32727  | 914,95652  | 88,62244  | 7,38278  |
| 2014 | LureAlbion | LK14 | StTrinit | 9  | J30 | 12,4 forte | 95,9496337  | 145,83030 | 6,68098 | 90,81212  | 1242,37839 | 96,92314  | 7,05128  |
| 2014 | LureAlbion | LK14 | StTrinit | 9  | J30 | 12,4 forte | 116,6932234 | 134,21212 | 7,03675 | 92,89091  | 987,47739  | 88,32177  | 10,24542 |
| 2014 | LureAlbion | LK14 | StTrinit | 9  | J30 | 12,4 forte | 98,44139194 | 139,70303 | 6,73798 | 92,91818  | 866,61673  | 89,95605  | 7,41255  |
| 2014 | LureAlbion | LK14 | StTrinit | 9  | J30 | 12,4 forte | 118,4716117 | 203,96768 | 6,54464 | 91,25455  | 1167,37265 | 93,22744  | 6,74405  |
| 2014 | LureAlbion | LK14 | StTrinit | 9  | J30 | 12,4 forte | 140,6401099 | 155,88283 | NA      | 99,54545  | NA         | 83,52884  | NA       |
| 2014 | LureAlbion | LK14 | StTrinit | 9  | J30 | 12,4 forte | 93,91300366 | 195,79798 | NA      | 89,39394  | NA         | 82,63290  | NA       |
| 2014 | LureAlbion | LK14 | StTrinit | 18 | J30 | 12,4 forte | 150,9047619 | 72,91515  | 6,07521 | 96,67273  | 742,81933  | 86,55601  | 7,17353  |
| 2014 | LureAlbion | LK14 | StTrinit | 18 | J30 | 12,4 forte | 136,8754579 | 93,31515  | 6,12340 | 88,92121  | 1046,63154 | 91,69661  | 9,38919  |
| 2014 | LureAlbion | LK14 | StTrinit | 18 | J30 | 12,4 forte | 144,3772894 | 94,75152  | 7,00069 | 93,16364  | 563,71613  | 93,08103  | 7,82372  |
| 2014 | LureAlbion | LK14 | StTrinit | 18 | J30 | 12,4 forte | 130,4166667 | 131,89091 | 6,42949 | 89,91515  | 918,95715  | 87,55088  | 7,66484  |
| 2014 | LureAlbion | LK14 | StTrinit | 18 | J30 | 12,4 forte | 142,8736264 | 141,90303 | 6,77656 | 89,13333  | 839,68507  | 100,12507 | 5,39560  |
| 2014 | LureAlbion | LK14 | StTrinit | 18 | J30 | 12,4 forte | 139,1547619 | 110,98182 | 7,09684 | 90,57576  | 803,02278  | 96,89405  | 6,05449  |
| 2014 | LureAlbion | LK14 | StTrinit | 18 | J30 | 12,4 forte | 130,3598901 | 101,65455 | 6,94643 | 93,11515  | NA         | 87,35821  | 7,62271  |
| 2014 | LureAlbion | LK14 | StTrinit | 18 | J30 | 12,4 forte | 136,6739927 | 121,00202 | NA      | 90,17273  | NA         | 97,02564  | 7,55014  |
| 2014 | LureAlbion | LK14 | StTrinit | 18 | J30 | 12,4 forte | 88,15934066 | 115,05455 | NA      | 79,81212  | NA         | 95,52163  | NA       |
| 2014 | LureAlbion | LK14 | StTrinit | 18 | J30 | 12,4 forte | 131,5128205 | 139,26465 | NA      | 99,52121  | NA         | 92,63523  | NA       |

|      |            |      |          |    |     |             |             |           |         |           |            |           |          |
|------|------------|------|----------|----|-----|-------------|-------------|-----------|---------|-----------|------------|-----------|----------|
| 2014 | LureAlbion | LK14 | StTrinit | 7  | J30 | 13,5 forte  | 169,3461538 | 106,37576 | 8,74588 | 103,59394 | 1307,15292 | 93,02489  | 13,94918 |
| 2014 | LureAlbion | LK14 | StTrinit | 7  | J30 | 13,5 forte  | 98,49358974 | 157,98788 | 7,78022 | 93,95152  | 1365,81659 | 86,21196  | 12,66484 |
| 2014 | LureAlbion | LK14 | StTrinit | 7  | J30 | 13,5 forte  | 92,05769231 | 109,41212 | 6,73935 | 100,65455 | 1017,25190 | 83,17404  | 9,70559  |
| 2014 | LureAlbion | LK14 | StTrinit | 7  | J30 | 13,5 forte  | 145,6492674 | 223,60000 | 9,00275 | 93,80000  | 1314,74503 | 90,48646  | 10,68773 |
| 2014 | LureAlbion | LK14 | StTrinit | 7  | J30 | 13,5 forte  | 148,5576923 | 135,70909 | 8,87775 | 107,12727 | 955,06302  | 84,84021  | 6,52610  |
| 2014 | LureAlbion | LK14 | StTrinit | 7  | J30 | 13,5 forte  | 124,1172161 | 157,62828 | 7,70879 | 94,88485  | 867,72515  | 89,17001  | 11,88599 |
| 2014 | LureAlbion | LK14 | StTrinit | 7  | J30 | 13,5 forte  | 121,9175824 | 167,28485 | 8,82967 | 95,51818  | 1220,05347 | 83,12590  | 11,82784 |
| 2014 | LureAlbion | LK14 | StTrinit | 7  | J30 | 13,5 forte  | 121,7014652 | 159,58182 | NA      | 92,84242  | 1208,23578 | 80,83845  | 9,33310  |
| 2014 | LureAlbion | LK14 | StTrinit | 7  | J30 | 13,5 forte  | 98,07234432 | 164,40404 | NA      | 95,71515  | 837,14191  | 84,06093  | 10,87431 |
| 2014 | LureAlbion | LK14 | StTrinit | 7  | J30 | 13,5 forte  | 154,5512821 | 139,95152 | NA      | 100,32727 | 1058,57554 | 83,55284  | NA       |
| 2014 | LureAlbion | LZ14 | Banon    | 5  | J30 | 10,6 faible | 128,4752747 | 290,86061 | 8,70536 | 100,83636 | 1020,16743 | 125,62309 | 14,83974 |
| 2014 | LureAlbion | LZ14 | Banon    | 5  | J30 | 10,6 faible | 135,4917582 | 313,93939 | 7,72356 | 89,23636  | 741,31422  | 135,81539 | 9,53984  |
| 2014 | LureAlbion | LZ14 | Banon    | 5  | J30 | 10,6 faible | 95,32783883 | 261,76970 | 6,55037 | 97,56970  | 718,64102  | 140,70583 | 14,15751 |
| 2014 | LureAlbion | LZ14 | Banon    | 5  | J30 | 10,6 faible | 121,5906593 | 216,34747 | 7,92960 | 105,06667 | 803,94674  | 137,48294 | 15,08333 |
| 2014 | LureAlbion | LZ14 | Banon    | 5  | J30 | 10,6 faible | 86,8040293  | 193,69697 | 8,42262 | 110,35152 | 1031,16942 | 141,74735 | 12,74679 |
| 2014 | LureAlbion | LZ14 | Banon    | 5  | J30 | 10,6 faible | 93,66117216 | 278,80000 | 7,84867 | 93,67273  | 1080,46724 | 135,08700 | 11,19139 |
| 2014 | LureAlbion | LZ14 | Banon    | 5  | J30 | 10,6 faible | 117,4221612 | 143,74949 | 5,78365 | 100,80606 | 1030,96644 | 140,45221 | 14,69048 |
| 2014 | LureAlbion | LZ14 | Banon    | 5  | J30 | 10,6 faible | 100,9542125 | 258,99394 | NA      | 102,11515 | 427,16834  | 147,88677 | 10,96566 |
| 2014 | LureAlbion | LZ14 | Banon    | 5  | J30 | 10,6 faible | 93,80128205 | 262,12121 | NA      | 98,63030  | 1016,22855 | 142,32189 | 11,65385 |
| 2014 | LureAlbion | LZ14 | Banon    | 5  | J30 | 10,6 faible | 131,8598901 | 208,51717 | NA      | 102,48485 | 981,04244  | 136,27886 | 11,22619 |
| 2014 | LureAlbion | LZ14 | Banon    | 3  | J30 | 12,2 faible | 122,3365385 | 185,95152 | 7,69964 | 101,93333 | 673,11779  | 135,08864 | 6,22734  |
| 2014 | LureAlbion | LZ14 | Banon    | 3  | J30 | 12,2 faible | 144,3525641 | 235,56364 | 7,18338 | 102,80606 | 602,85560  | 140,60229 | 7,74496  |
| 2014 | LureAlbion | LZ14 | Banon    | 3  | J30 | 12,2 faible | 119,9542125 | 179,41414 | 7,32315 | 100,28485 | 579,54266  | 141,29757 | 7,24245  |
| 2014 | LureAlbion | LZ14 | Banon    | 3  | J30 | 12,2 faible | 131,1785714 | 189,96364 | 8,05861 | 94,87273  | 626,55178  | 140,52959 | 10,26694 |
| 2014 | LureAlbion | LZ14 | Banon    | 3  | J30 | 12,2 faible | 122,8406593 | 169,64040 | 7,42995 | 100,81818 | 856,16144  | 140,27557 | 8,65568  |
| 2014 | LureAlbion | LZ14 | Banon    | 3  | J30 | 12,2 faible | 123,728022  | 250,88485 | 7,79922 | 96,05455  | 434,26933  | 138,14922 | 5,30082  |
| 2014 | LureAlbion | LZ14 | Banon    | 3  | J30 | 12,2 faible | 123,8553114 | 227,29697 | 7,90351 | 94,40000  | 306,21832  | 144,70282 | 8,46337  |
| 2014 | LureAlbion | LZ14 | Banon    | 3  | J30 | 12,2 faible | 124,0018315 | 214,01818 | 6,52026 | 90,92727  | 445,93224  | 143,85869 | 6,42788  |
| 2014 | LureAlbion | LZ14 | Banon    | 3  | J30 | 12,2 faible | 72,67673993 | 153,87071 | 7,25103 | 90,86061  | 565,70305  | 130,80888 | 6,51648  |
| 2014 | LureAlbion | LZ14 | Banon    | 3  | J30 | 12,2 faible | 64,59981685 | NA        | NA      | 85,56364  | NA         | 131,94485 | NA       |
| 2014 | LureAlbion | LZ14 | Banon    | 20 | J30 | 12,3 faible | 141,8003663 | 118,30303 | 8,02473 | 98,68485  | 659,23773  | 139,20949 | 6,20833  |
| 2014 | LureAlbion | LZ14 | Banon    | 20 | J30 | 12,3 faible | 88,94322344 | 178,78788 | 6,94093 | 84,58788  | 1312,02927 | 118,15846 | 11,93613 |
| 2014 | LureAlbion | LZ14 | Banon    | 20 | J30 | 12,3 faible | 102,5123626 | 128,83636 | 6,42491 | 95,26061  | 648,96552  | 121,26849 | 11,31639 |
| 2014 | LureAlbion | LZ14 | Banon    | 20 | J30 | 12,3 faible | 118,3031136 | 150,15152 | 6,35875 | 103,08485 | 687,35568  | 129,63400 | 10,64515 |
| 2014 | LureAlbion | LZ14 | Banon    | 20 | J30 | 12,3 faible | 77,82326007 | 234,47273 | 6,22287 | 88,59394  | 1294,98056 | 151,29759 | 13,04533 |
| 2014 | LureAlbion | LZ14 | Banon    | 20 | J30 | 12,3 faible | 70,0485348  | 215,93333 | 5,97619 | 86,24848  | 907,79339  | 137,70617 | 12,56273 |
| 2014 | LureAlbion | LZ14 | Banon    | 20 | J30 | 12,3 faible | 75,00824176 | 227,20000 | 6,56422 | 87,79394  | 832,34550  | 126,24282 | 9,86538  |
| 2014 | LureAlbion | LZ14 | Banon    | 20 | J30 | 12,3 faible | 77,37545788 | 188,83636 | 5,84581 | 96,07273  | 831,89490  | 129,46162 | 10,94277 |
| 2014 | LureAlbion | LZ14 | Banon    | 20 | J30 | 12,3 faible | 128,6529304 | 206,02424 | 5,84501 | 88,16364  | 767,35406  | 129,88991 | NA       |
| 2014 | LureAlbion | LZ14 | Banon    | 20 | J30 | 12,3 faible | 72,77564103 | 205,30909 | NA      | 83,26364  | NA         | 134,93726 | NA       |
| 2014 | LureAlbion | LZ14 | Banon    | 6  | J30 | 13,9 faible | 142,2106227 | 218,56566 | 7,47322 | 85,87273  | 541,45147  | 142,33592 | 8,80701  |

|      |            |      |       |    |     |      |        |             |           |         |           |            |           |          |
|------|------------|------|-------|----|-----|------|--------|-------------|-----------|---------|-----------|------------|-----------|----------|
| 2014 | LureAlbion | LZ14 | Banon | 6  | J30 | 13,9 | faible | 138,9761905 | 139,76162 | 6,50687 | 91,70909  | 391,75976  | 154,19166 | 6,87157  |
| 2014 | LureAlbion | LZ14 | Banon | 6  | J30 | 13,9 | faible | 108,9661172 | 214,29091 | 7,64767 | 102,87879 | 636,52201  | 138,82856 | 9,02198  |
| 2014 | LureAlbion | LZ14 | Banon | 6  | J30 | 13,9 | faible | 113,6346154 | 143,27273 | 7,65224 | 99,07879  | 552,77619  | 144,91328 | 8,41621  |
| 2014 | LureAlbion | LZ14 | Banon | 6  | J30 | 13,9 | faible | 106,8672161 | 121,71515 | 6,74245 | 100,33939 | 931,32800  | 145,18369 | 8,24519  |
| 2014 | LureAlbion | LZ14 | Banon | 6  | J30 | 13,9 | faible | 120,1694139 | 124,60606 | 7,34856 | 100,55758 | NA         | 139,60109 | 6,84112  |
| 2014 | LureAlbion | LZ14 | Banon | 6  | J30 | 13,9 | faible | 154,3777473 | 138,89697 | NA      | 104,30303 | NA         | 156,62636 | 9,36355  |
| 2014 | LureAlbion | LZ14 | Banon | 6  | J30 | 13,9 | faible | 131,235348  | 121,92727 | NA      | 103,56364 | NA         | 156,09999 | NA       |
| 2014 | LureAlbion | LZ14 | Banon | 6  | J30 | 13,9 | faible | 133,4377289 | 147,36364 | NA      | 100,66667 | NA         | 149,04633 | NA       |
| 2014 | LureAlbion | LZ14 | Banon | 6  | J30 | 13,9 | faible | 130,2234432 | NA        | NA      | 100,91818 | NA         | 142,09458 | NA       |
| 2014 | LureAlbion | LZ14 | Banon | 17 | J30 | 14,3 | faible | 138,0595238 | 153,62424 | 7,52507 | 106,07273 | 562,05577  | 155,49625 | 8,70673  |
| 2014 | LureAlbion | LZ14 | Banon | 17 | J30 | 14,3 | faible | 127,9331502 | 239,53535 | 5,88553 | 96,56364  | 620,76137  | 155,77160 | 10,57875 |
| 2014 | LureAlbion | LZ14 | Banon | 17 | J30 | 14,3 | faible | 141,6950549 | 48,72727  | 8,83768 | 110,27879 | 820,59644  | 157,42248 | 9,64606  |
| 2014 | LureAlbion | LZ14 | Banon | 17 | J30 | 14,3 | faible | 139,9093407 | 161,39394 | 7,26809 | 95,44242  | 576,20431  | 156,65734 | 9,85234  |
| 2014 | LureAlbion | LZ14 | Banon | 17 | J30 | 14,3 | faible | 147,7188645 | 155,88485 | 8,88874 | 107,20606 | 857,51815  | 162,73153 | 11,20604 |
| 2014 | LureAlbion | LZ14 | Banon | 17 | J30 | 14,3 | faible | 141,1501832 | 128,55354 | 7,34822 | 107,89091 | 501,89016  | 168,11989 | 8,48306  |
| 2014 | LureAlbion | LZ14 | Banon | 17 | J30 | 14,3 | faible | 144,4981685 | 186,47677 | 7,84409 | 107,20606 | 751,00791  | 158,10315 | 12,10714 |
| 2014 | LureAlbion | LZ14 | Banon | 17 | J30 | 14,3 | faible | 145,2673993 | 137,96768 | 6,50183 | 99,96970  | 79,25596   | 150,00510 | 11,57555 |
| 2014 | LureAlbion | LZ14 | Banon | 17 | J30 | 14,3 | faible | 92,23901099 | 222,35152 | 7,59512 | 104,26667 | 1113,35479 | 159,91474 | NA       |
| 2014 | LureAlbion | LZ14 | Banon | 17 | J30 | 14,3 | faible | 130,8608059 | NA        | NA      | 91,00606  | NA         | 159,23637 | NA       |
| 2014 | LureAlbion | LZ14 | Banon | 11 | J30 | 30,7 | forte  | 73,11263736 | 179,72121 | 7,03675 | 94,04242  | 908,88334  | 151,10797 | 5,97253  |
| 2014 | LureAlbion | LZ14 | Banon | 11 | J30 | 30,7 | forte  | 78,66666667 | 132,72323 | 6,65522 | 99,33333  | 775,31914  | 163,91037 | 7,75069  |
| 2014 | LureAlbion | LZ14 | Banon | 11 | J30 | 30,7 | forte  | 68,76648352 | 131,54343 | 6,55117 | 96,85455  | 961,21839  | 163,02925 | 6,95124  |
| 2014 | LureAlbion | LZ14 | Banon | 11 | J30 | 30,7 | forte  | 72,08791209 | 197,09697 | 6,73146 | 95,89697  | 1078,12190 | 151,68257 | 7,39011  |
| 2014 | LureAlbion | LZ14 | Banon | 11 | J30 | 30,7 | forte  | 109,1346154 | 117,76970 | 7,80907 | 103,20000 | 809,24439  | 145,92367 | 8,13530  |
| 2014 | LureAlbion | LZ14 | Banon | 11 | J30 | 30,7 | forte  | 103,0549451 | 192,83636 | 7,50733 | 103,36364 | 1263,05120 | 162,01578 | 8,11195  |
| 2014 | LureAlbion | LZ14 | Banon | 11 | J30 | 30,7 | forte  | 134,53663   | 121,87879 | 7,52381 | 101,18788 | 477,70424  | 153,96829 | 9,83516  |
| 2014 | LureAlbion | LZ14 | Banon | 11 | J30 | 30,7 | forte  | 113,253663  | 75,70909  | 7,52164 | 109,44848 | NA         | 164,54258 | 7,46291  |
| 2014 | LureAlbion | LZ14 | Banon | 11 | J30 | 30,7 | forte  | 117,6126374 | NA        | 9,25996 | 110,73333 | NA         | 158,31929 | 8,15385  |
| 2014 | LureAlbion | LZ14 | Banon | 11 | J30 | 30,7 | forte  | 104,2335165 | NA        | 7,26649 | 108,23030 | NA         | 161,55716 | NA       |
| 2014 | LureAlbion | LZ14 | Banon | 8  | J30 | 31,6 | forte  | 108,7399267 | 208,59394 | 6,43246 | 108,31818 | 1072,86428 | 118,85362 | 10,30357 |
| 2014 | LureAlbion | LZ14 | Banon | 8  | J30 | 31,6 | forte  | 118,2445055 | 204,76768 | 7,38015 | 107,94545 | 1038,92631 | 117,36672 | 9,40865  |
| 2014 | LureAlbion | LZ14 | Banon | 8  | J30 | 31,6 | forte  | 93,53388278 | 143,92323 | 7,27083 | 113,75152 | 518,22165  | 114,75416 | 11,31250 |
| 2014 | LureAlbion | LZ14 | Banon | 8  | J30 | 31,6 | forte  | 112,6639194 | 158,59394 | 8,06227 | 122,23636 | 1026,47180 | 126,57934 | 8,71978  |
| 2014 | LureAlbion | LZ14 | Banon | 8  | J30 | 31,6 | forte  | 91,38278388 | 153,15960 | 6,83242 | 103,34545 | 755,24353  | 119,94463 | NA       |
| 2014 | LureAlbion | LZ14 | Banon | 8  | J30 | 31,6 | forte  | 83,97893773 | 180,44040 | 6,96864 | 99,99091  | 752,19694  | 126,34329 | NA       |
| 2014 | LureAlbion | LZ14 | Banon | 8  | J30 | 31,6 | forte  | 124,2564103 | 92,52121  | 8,79670 | 122,67879 | 1126,62724 | 117,61117 | NA       |
| 2014 | LureAlbion | LZ14 | Banon | 8  | J30 | 31,6 | forte  | 96,93223443 | 101,74545 | 6,40007 | 109,52121 | 655,73083  | 123,02670 | NA       |
| 2014 | LureAlbion | LZ14 | Banon | 8  | J30 | 31,6 | forte  | 126,467033  | 187,36364 | 7,43178 | 111,07273 | NA         | 127,26691 | NA       |
| 2014 | LureAlbion | LZ14 | Banon | 8  | J30 | 31,6 | forte  | 90,89835165 | NA        | NA      | 110,43030 | NA         | 119,70489 | NA       |
| 2014 | LureAlbion | LZ14 | Banon | 1  | J30 | 32,6 | forte  | 133,0549451 | 142,94545 | 6,86504 | 108,75152 | 1044,56764 | 120,05131 | 8,74176  |
| 2014 | LureAlbion | LZ14 | Banon | 1  | J30 | 32,6 | forte  | 125,5009158 | 103,02424 | 7,80930 | 116,89697 | 677,13510  | 117,54793 | 5,79190  |

|      |            |      |           |    |     |             |             |           |          |           |            |           |          |
|------|------------|------|-----------|----|-----|-------------|-------------|-----------|----------|-----------|------------|-----------|----------|
| 2014 | LureAlbion | LZ14 | Banon     | 1  | J30 | 32,6 forte  | 131,8846154 | 104,21818 | 6,27083  | 109,81212 | 1277,88654 | 123,18400 | 6,50618  |
| 2014 | LureAlbion | LZ14 | Banon     | 1  | J30 | 32,6 forte  | 129,3864469 | 85,27273  | 7,48695  | 111,46061 | 603,28713  | 117,30769 | 9,32486  |
| 2014 | LureAlbion | LZ14 | Banon     | 1  | J30 | 32,6 forte  | 139,8498168 | 135,73939 | 7,41575  | 115,49697 | 812,47932  | 124,60295 | 10,14148 |
| 2014 | LureAlbion | LZ14 | Banon     | 1  | J30 | 32,6 forte  | 134,8498168 | 140,77576 | 7,56616  | 119,01818 | 1181,88992 | 128,72434 | 7,62363  |
| 2014 | LureAlbion | LZ14 | Banon     | 1  | J30 | 32,6 forte  | 121,2454212 | 127,96364 | 7,24290  | 110,63636 | 749,89415  | 122,76621 | 7,15568  |
| 2014 | LureAlbion | LZ14 | Banon     | 1  | J30 | 32,6 forte  | 140,2261905 | 134,46667 | 8,19757  | 120,18788 | 373,94477  | 104,98758 | 9,07097  |
| 2014 | LureAlbion | LZ14 | Banon     | 1  | J30 | 32,6 forte  | 103,7518315 | 117,88687 | 6,26305  | 102,39394 | 878,43682  | 120,87171 | 8,39881  |
| 2014 | LureAlbion | LZ14 | Banon     | 1  | J30 | 32,6 forte  | 89,82326007 | 122,36768 | 7,31891  | 108,39394 | NA         | 126,23356 | 6,52953  |
| 2014 | LureAlbion | LZ14 | Banon     | 16 | J30 | 33,3 forte  | 95,31318681 | 148,80000 | 6,18063  | 110,23030 | 1292,23987 | 116,25928 | 6,82051  |
| 2014 | LureAlbion | LZ14 | Banon     | 16 | J30 | 33,3 forte  | 140,1694139 | 80,89091  | 7,26122  | 123,60606 | 1004,53471 | 113,69826 | 8,06777  |
| 2014 | LureAlbion | LZ14 | Banon     | 16 | J30 | 33,3 forte  | 138,3415751 | 137,52121 | 6,58562  | 112,94545 | 1744,46243 | 125,98555 | 7,54808  |
| 2014 | LureAlbion | LZ14 | Banon     | 16 | J30 | 33,3 forte  | 98,4514652  | 116,68485 | 5,72047  | 108,11515 | 1220,31020 | 116,84970 | 6,80288  |
| 2014 | LureAlbion | LZ14 | Banon     | 16 | J30 | 33,3 forte  | 84,93040293 | 105,11515 | 6,00241  | 101,04242 | 644,63301  | 114,66468 | 7,60646  |
| 2014 | LureAlbion | LZ14 | Banon     | 16 | J30 | 33,3 forte  | 82,19047619 | 99,11515  | 6,65797  | 106,50909 | 1191,06606 | 120,92697 | 6,91758  |
| 2014 | LureAlbion | LZ14 | Banon     | 16 | J30 | 33,3 forte  | 155,7032967 | 143,57172 | 6,68109  | 111,15758 | 1259,40406 | 110,32826 | 8,33883  |
| 2014 | LureAlbion | LZ14 | Banon     | 16 | J30 | 33,3 forte  | 89,26190476 | 148,27071 | 6,53114  | 105,91515 | 1076,91043 | 124,34044 | 7,00755  |
| 2014 | LureAlbion | LZ14 | Banon     | 16 | J30 | 33,3 forte  | 84,85531136 | 119,27273 | 5,92239  | 92,53636  | 1108,24430 | 127,81559 | 8,18819  |
| 2014 | LureAlbion | LZ14 | Banon     | 16 | J30 | 33,3 forte  | 85,38186813 | 109,76364 | NA       | NA        | NA         | 116,46315 | NA       |
| 2014 | LureAlbion | LZ14 | Banon     | 18 | J30 | 34,5 forte  | 134,959707  | 138,52121 | 9,50069  | 102,50303 | 1222,98759 | 166,94484 | 13,48764 |
| 2014 | LureAlbion | LZ14 | Banon     | 18 | J30 | 34,5 forte  | 135,5173993 | 159,48485 | 7,38027  | 87,16970  | 707,70710  | 165,51269 | 9,24451  |
| 2014 | LureAlbion | LZ14 | Banon     | 18 | J30 | 34,5 forte  | 135,2628205 | 231,52121 | 8,69551  | 95,68485  | 326,73931  | 163,15462 | 10,22527 |
| 2014 | LureAlbion | LZ14 | Banon     | 18 | J30 | 34,5 forte  | 120,7912088 | 272,17374 | 8,74863  | 98,98788  | 407,96082  | 169,92218 | 11,18178 |
| 2014 | LureAlbion | LZ14 | Banon     | 18 | J30 | 34,5 forte  | 154,8809524 | 150,27879 | 7,60211  | 96,30909  | 1228,15458 | 171,63832 | 13,18269 |
| 2014 | LureAlbion | LZ14 | Banon     | 18 | J30 | 34,5 forte  | 118,5228938 | 157,81818 | 8,81960  | 96,50303  | 774,51013  | 157,04998 | 15,38965 |
| 2014 | LureAlbion | LZ14 | Banon     | 18 | J30 | 34,5 forte  | 130,5659341 | 163,83838 | 8,63084  | 105,60606 | 860,87138  | 186,27302 | 12,10073 |
| 2014 | LureAlbion | LZ14 | Banon     | 18 | J30 | 34,5 forte  | 127,0650183 | 179,52727 | 9,32349  | 101,58788 | 749,09502  | 159,53703 | 11,06937 |
| 2014 | LureAlbion | LZ14 | Banon     | 18 | J30 | 34,5 forte  | 139,6474359 | 139,30505 | 8,25069  | 103,46061 | NA         | 168,03959 | 10,04625 |
| 2014 | LureAlbion | LZ14 | Banon     | 18 | J30 | 34,5 forte  | 125,8873626 | NA        | NA       | 99,58182  | NA         | 168,75275 | 9,83242  |
| 2014 | Valensole  | VM14 | Puimichel | 19 | J30 | 8,6 faible  | 150,9615385 | 102,18990 | 7,08276  | 93,07879  | 1105,88106 | 144,52352 | 11,74176 |
| 2014 | Valensole  | VM14 | Puimichel | 19 | J30 | 8,6 faible  | 136,0970696 | 205,87475 | 8,23443  | 100,15152 | 1166,82564 | 150,43492 | 7,46978  |
| 2014 | Valensole  | VM14 | Puimichel | 19 | J30 | 8,6 faible  | 157,5155678 | 101,18788 | 8,70009  | 99,29091  | 628,11159  | 120,52403 | 7,08562  |
| 2014 | Valensole  | VM14 | Puimichel | 19 | J30 | 8,6 faible  | 146,9899267 | 246,25859 | 7,46268  | 92,95758  | 548,57794  | 142,40754 | 7,48970  |
| 2014 | Valensole  | VM14 | Puimichel | 19 | J30 | 8,6 faible  | 164,6996337 | 162,03636 | 10,69139 | 107,95758 | 844,39651  | 148,86340 | 9,72115  |
| 2014 | Valensole  | VM14 | Puimichel | 19 | J30 | 8,6 faible  | 158,1364469 | 235,00606 | 9,26603  | 108,06667 | 920,25499  | 131,26542 | 8,50343  |
| 2014 | Valensole  | VM14 | Puimichel | 19 | J30 | 8,6 faible  | 158,9313187 | 180,59798 | 8,87260  | 104,95152 | 542,75641  | 129,58596 | 6,31227  |
| 2014 | Valensole  | VM14 | Puimichel | 19 | J30 | 8,6 faible  | 165,5869963 | 121,24848 | 9,39801  | 104,47273 | 470,12709  | 135,63831 | 10,06456 |
| 2014 | Valensole  | VM14 | Puimichel | 19 | J30 | 8,6 faible  | 88,2239011  | 136,21818 | 6,47413  | 88,94545  | NA         | 136,22438 | 7,96566  |
| 2014 | Valensole  | VM14 | Puimichel | 19 | J30 | 8,6 faible  | 90,88827839 | NA        | 7,07143  | 97,75152  | NA         | 124,70063 | NA       |
| 2014 | Valensole  | VM14 | Puimichel | 3  | J30 | 11,2 faible | 72,49908425 | 194,35758 | 5,49748  | 79,24242  | 546,57212  | 135,47556 | 7,41346  |
| 2014 | Valensole  | VM14 | Puimichel | 3  | J30 | 11,2 faible | 79,17399267 | 168,36364 | 6,64423  | 85,66667  | 1047,28739 | 152,59525 | 8,00275  |
| 2014 | Valensole  | VM14 | Puimichel | 3  | J30 | 11,2 faible | 79,16483516 | 191,87879 | 5,39080  | 88,35758  | 1255,32086 | 145,81517 | 8,45238  |

|      |           |      |           |    |     |             |             |           |         |           |            |           |          |
|------|-----------|------|-----------|----|-----|-------------|-------------|-----------|---------|-----------|------------|-----------|----------|
| 2014 | Valensole | VM14 | Puimichel | 3  | J30 | 11,2 faible | 86,53571429 | 173,89091 | 5,86367 | 87,13939  | 1027,95696 | 152,10946 | 11,01648 |
| 2014 | Valensole | VM14 | Puimichel | 3  | J30 | 11,2 faible | 84,18864469 | 176,10101 | 5,57051 | 83,76364  | 542,52735  | 149,48351 | 10,43773 |
| 2014 | Valensole | VM14 | Puimichel | 3  | J30 | 11,2 faible | 52,98992674 | 186,31111 | 5,26259 | 80,36364  | 1012,08690 | 131,69220 | 5,36607  |
| 2014 | Valensole | VM14 | Puimichel | 3  | J30 | 11,2 faible | 143,0210623 | 164,72727 | 6,63496 | 98,27273  | 1263,53456 | 138,52146 | 10,21383 |
| 2014 | Valensole | VM14 | Puimichel | 3  | J30 | 11,2 faible | 84,23351648 | 205,84242 | 6,18086 | 85,63636  | 365,82740  | 139,01069 | 9,02885  |
| 2014 | Valensole | VM14 | Puimichel | 3  | J30 | 11,2 faible | 80,49450549 | 200,75960 | 5,97802 | 84,07273  | NA         | 135,62816 | 4,54533  |
| 2014 | Valensole | VM14 | Puimichel | 3  | J30 | 11,2 faible | 84,55677656 | 176,08485 | NA      | 79,64848  | NA         | 135,60389 | NA       |
| 2014 | Valensole | VM14 | Puimichel | 4  | J30 | 16,2 faible | 151,1611722 | 140,99394 | 7,45444 | 118,53333 | 878,62543  | 109,51678 | 7,40865  |
| 2014 | Valensole | VM14 | Puimichel | 4  | J30 | 16,2 faible | 144,1217949 | 127,45859 | 8,05632 | 115,31515 | 1284,99586 | 111,86841 | 9,87958  |
| 2014 | Valensole | VM14 | Puimichel | 4  | J30 | 16,2 faible | 134,0650183 | 158,66061 | 7,32853 | 116,60606 | 1304,50572 | 121,03151 | 8,68063  |
| 2014 | Valensole | VM14 | Puimichel | 4  | J30 | 16,2 faible | 145,5686813 | 136,16970 | 6,31456 | 117,66667 | 1223,51496 | 109,32371 | 10,14148 |
| 2014 | Valensole | VM14 | Puimichel | 4  | J30 | 16,2 faible | 95,86172161 | 118,55354 | 6,33379 | 114,52424 | 876,20729  | 106,31582 | 7,70261  |
| 2014 | Valensole | VM14 | Puimichel | 4  | J30 | 16,2 faible | 88,6474359  | 176,82020 | 7,86539 | 103,74242 | 974,84152  | 94,05985  | 8,75000  |
| 2014 | Valensole | VM14 | Puimichel | 4  | J30 | 16,2 faible | 87,81043956 | 149,61616 | 7,93407 | 125,47273 | 1382,40154 | 102,02823 | 6,97390  |
| 2014 | Valensole | VM14 | Puimichel | 4  | J30 | 16,2 faible | 144,5068681 | 108,67879 | 7,22367 | 119,86061 | 1359,76176 | 116,28111 | 11,06456 |
| 2014 | Valensole | VM14 | Puimichel | 4  | J30 | 16,2 faible | 157,2619048 | 170,08081 | 7,15980 | 120,11515 | NA         | 120,39124 | 8,91667  |
| 2014 | Valensole | VM14 | Puimichel | 4  | J30 | 16,2 faible | 105,1126374 | 162,40808 | 8,01946 | 112,66061 | NA         | 113,57555 | NA       |
| 2014 | Valensole | VM14 | Puimichel | 5  | J30 | 19,1 faible | 142,8571429 | 118,88889 | 6,49977 | 114,51515 | 974,31848  | 100,37151 | 7,38874  |
| 2014 | Valensole | VM14 | Puimichel | 5  | J30 | 19,1 faible | 134,5357143 | 125,68485 | 7,19826 | 120,15152 | 1207,94981 | 110,91378 | 7,75595  |
| 2014 | Valensole | VM14 | Puimichel | 5  | J30 | 19,1 faible | 157,9221612 | 174,89697 | 9,11905 | 135,56364 | 946,24614  | 108,86824 | 8,67651  |
| 2014 | Valensole | VM14 | Puimichel | 5  | J30 | 19,1 faible | 149,2481685 | 58,66667  | 6,86790 | 105,45455 | 1821,52318 | 105,61423 | 7,24038  |
| 2014 | Valensole | VM14 | Puimichel | 5  | J30 | 19,1 faible | 145,532967  | 103,15960 | 7,98077 | 122,97576 | 1096,26824 | 108,64883 | 7,18269  |
| 2014 | Valensole | VM14 | Puimichel | 5  | J30 | 19,1 faible | 138,5064103 | 148,54545 | 6,76351 | 109,25455 | 1109,31026 | 101,86451 | 8,04167  |
| 2014 | Valensole | VM14 | Puimichel | 5  | J30 | 19,1 faible | 156,6675824 | 195,91111 | 7,81616 | 124,68485 | 792,94755  | 105,23818 | 8,01282  |
| 2014 | Valensole | VM14 | Puimichel | 5  | J30 | 19,1 faible | 142,4294872 | 200,92525 | 7,55220 | 119,63030 | 1368,68035 | 102,91053 | 6,37019  |
| 2014 | Valensole | VM14 | Puimichel | 5  | J30 | 19,1 faible | 143,7225275 | 99,78182  | 9,46291 | 133,03636 | 1097,87762 | 101,67119 | 7,95375  |
| 2014 | Valensole | VM14 | Puimichel | 5  | J30 | 19,1 faible | 154,5247253 | NA        | 9,06456 | 135,87879 | 1095,40079 | 107,99162 | 9,48260  |
| 2014 | Valensole | VM14 | Puimichel | 1  | J30 | 19,6 faible | 133,3782051 | 160,89697 | 9,65431 | 125,92121 | 1163,19443 | 102,16009 | 7,25733  |
| 2014 | Valensole | VM14 | Puimichel | 1  | J30 | 19,6 faible | 161,9826007 | 235,96364 | 9,11539 | 127,32727 | 876,42747  | 98,42483  | 7,52816  |
| 2014 | Valensole | VM14 | Puimichel | 1  | J30 | 19,6 faible | 145,217033  | 140,63030 | 9,28068 | 134,78182 | 893,96844  | 103,73055 | 7,75824  |
| 2014 | Valensole | VM14 | Puimichel | 1  | J30 | 19,6 faible | 155,775641  | 217,64242 | 8,80082 | 130,35152 | 1025,48488 | 108,76283 | 8,03800  |
| 2014 | Valensole | VM14 | Puimichel | 1  | J30 | 19,6 faible | 127,2087912 | 204,49697 | 9,55495 | 122,04242 | 1019,22985 | 106,04680 | 10,11607 |
| 2014 | Valensole | VM14 | Puimichel | 1  | J30 | 19,6 faible | 132,4862637 | 197,22424 | 9,15282 | 128,26667 | 919,32236  | 97,30674  | 10,72299 |
| 2014 | Valensole | VM14 | Puimichel | 1  | J30 | 19,6 faible | 166,6639194 | 183,16364 | 8,78297 | 122,58788 | 843,04522  | 105,39465 | 7,92308  |
| 2014 | Valensole | VM14 | Puimichel | 1  | J30 | 19,6 faible | 184,6767399 | 221,85051 | NA      | 127,86061 | 871,42423  | 100,35249 | 7,79190  |
| 2014 | Valensole | VM14 | Puimichel | 1  | J30 | 19,6 faible | 140,3333333 | 201,48687 | NA      | 129,06061 | 583,28660  | 102,65424 | 7,63393  |
| 2014 | Valensole | VM14 | Puimichel | 1  | J30 | 19,6 faible | 130,4249084 | 216,56364 | NA      | 109,32727 | 399,61375  | 101,61034 | 8,16758  |
| 2014 | Valensole | VM14 | Puimichel | 21 | J30 | 36,4 forte  | 102,4285714 | 133,82626 | 6,64858 | 105,32727 | 1849,69109 | 148,22385 | 4,82830  |
| 2014 | Valensole | VM14 | Puimichel | 21 | J30 | 36,4 forte  | 96,26556777 | 139,23232 | 6,19391 | 91,29091  | 1840,28734 | 141,27810 | 9,19505  |
| 2014 | Valensole | VM14 | Puimichel | 21 | J30 | 36,4 forte  | 79,66849817 | 159,28485 | 5,98466 | 102,52727 | 1837,39932 | 148,67510 | 8,93727  |
| 2014 | Valensole | VM14 | Puimichel | 21 | J30 | 36,4 forte  | 82,92673993 | 173,15960 | 5,81319 | 97,40000  | 1715,20995 | 154,34244 | 8,12683  |



|      |           |      |           |        |            |             |           |         |           |            |           |          |
|------|-----------|------|-----------|--------|------------|-------------|-----------|---------|-----------|------------|-----------|----------|
| 2014 | Valensole | VM14 | Puimichel | 21 J30 | 36,4 forte | 100,0576923 | 169,96768 | 6,94345 | 105,93333 | 1678,98726 | 154,62097 | 6,45604  |
| 2014 | Valensole | VM14 | Puimichel | 21 J30 | 36,4 forte | 70,95970696 | 135,69697 | 5,58620 | 88,65455  | 2192,63222 | 150,58949 | 6,65293  |
| 2014 | Valensole | VM14 | Puimichel | 21 J30 | 36,4 forte | 72,28479853 | 162,40606 | 6,69334 | 108,10909 | 1294,99332 | 163,58903 | 6,78159  |
| 2014 | Valensole | VM14 | Puimichel | 21 J30 | 36,4 forte | 88,49542125 | 167,07879 | 5,68991 | 107,95152 | 1608,28084 | 146,19386 | 6,73123  |
| 2014 | Valensole | VM14 | Puimichel | 21 J30 | 36,4 forte | 88,45054945 | 137,26061 | 5,77267 | 104,07273 | 1979,46310 | 150,00840 | 8,51282  |
| 2014 | Valensole | VM14 | Puimichel | 21 J30 | 36,4 forte | 99,25274725 | NA        | NA      | 99,24545  | NA         | 151,45350 | NA       |
| 2014 | Valensole | VM14 | Puimichel | 6 J30  | 39,4 forte | 89,53388278 | 220,20606 | 5,90076 | 105,89091 | 687,39942  | 142,25605 | 12,29258 |
| 2014 | Valensole | VM14 | Puimichel | 6 J30  | 39,4 forte | 101,9322344 | 165,55758 | 5,93773 | 107,67879 | 658,36371  | 140,30046 | 14,71886 |
| 2014 | Valensole | VM14 | Puimichel | 6 J30  | 39,4 forte | 111,1446886 | 112,56970 | 6,45696 | 109,52121 | 978,54111  | 139,74845 | 13,91300 |
| 2014 | Valensole | VM14 | Puimichel | 6 J30  | 39,4 forte | 106,6053114 | 107,11111 | 6,20604 | 100,26364 | 889,05000  | 134,54362 | 8,60027  |
| 2014 | Valensole | VM14 | Puimichel | 6 J30  | 39,4 forte | 137,0412088 | 167,13535 | 6,02679 | 108,87273 | 979,32772  | 132,09730 | 10,70742 |
| 2014 | Valensole | VM14 | Puimichel | 6 J30  | 39,4 forte | 110,8553114 | 117,46061 | 6,15385 | 109,06667 | 297,61541  | 138,21291 | 10,85348 |
| 2014 | Valensole | VM14 | Puimichel | 6 J30  | 39,4 forte | 103,5347985 | 194,89091 | 6,88897 | 112,67879 | 780,83423  | 137,63869 | 15,06319 |
| 2014 | Valensole | VM14 | Puimichel | 6 J30  | 39,4 forte | 118,2197802 | 132,51313 | 7,12729 | 103,27879 | 942,96977  | 126,55361 | 13,61538 |
| 2014 | Valensole | VM14 | Puimichel | 6 J30  | 39,4 forte | 41,18498168 | 153,05455 | 4,66644 | 93,85455  | 966,01954  | 131,94080 | 11,42628 |
| 2014 | Valensole | VM14 | Puimichel | 6 J30  | 39,4 forte | 82,21703297 | NA        | 5,70055 | 99,10303  | NA         | 122,91522 | NA       |
| 2014 | Valensole | VM14 | Puimichel | 10 J30 | 39,8 forte | 78,63736264 | 172,68283 | 6,43407 | 112,24242 | 1367,00328 | 146,98485 | 10,06044 |
| 2014 | Valensole | VM14 | Puimichel | 10 J30 | 39,8 forte | 77,39972527 | 245,99192 | 5,23798 | 108,01212 | 1292,87766 | 156,97613 | 7,67857  |
| 2014 | Valensole | VM14 | Puimichel | 10 J30 | 39,8 forte | 99,90384615 | 227,72727 | 5,90522 | 101,62424 | 1973,38328 | 156,99320 | 8,41712  |
| 2014 | Valensole | VM14 | Puimichel | 10 J30 | 39,8 forte | 78,53388278 | 200,73939 | 6,98695 | 95,35152  | 1430,81929 | 157,33769 | 8,63416  |
| 2014 | Valensole | VM14 | Puimichel | 10 J30 | 39,8 forte | 82,75274725 | 179,41818 | 6,42995 | 98,15152  | 1551,25069 | 146,92447 | 11,35623 |
| 2014 | Valensole | VM14 | Puimichel | 10 J30 | 39,8 forte | 76,22710623 | 176,13333 | 6,54877 | 90,56970  | 1498,09255 | 158,19692 | 8,65797  |
| 2014 | Valensole | VM14 | Puimichel | 10 J30 | 39,8 forte | 79,79395604 | 183,22828 | 7,09959 | 106,24848 | 1103,51472 | 153,53426 | 10,82875 |
| 2014 | Valensole | VM14 | Puimichel | 10 J30 | 39,8 forte | 72,87637363 | 144,23838 | NA      | 96,95152  | 1243,11378 | 160,15181 | 6,59020  |
| 2014 | Valensole | VM14 | Puimichel | 10 J30 | 39,8 forte | 75,11538462 | 180,84848 | NA      | 100,06667 | 1394,70616 | 143,44603 | 7,19231  |
| 2014 | Valensole | VM14 | Puimichel | 10 J30 | 39,8 forte | 79,81684982 | 176,43030 | NA      | 102,32727 | 1300,28375 | 144,86899 | 10,82555 |
| 2014 | Valensole | VM14 | Puimichel | 14 J30 | 40,5 forte | 177,1373626 | 67,00000  | 5,30151 | 127,37576 | 704,13522  | 125,78265 | 13,44368 |
| 2014 | Valensole | VM14 | Puimichel | 14 J30 | 40,5 forte | 125,1089744 | 76,54141  | 4,80197 | 110,66061 | 897,53950  | 127,76725 | 12,57875 |
| 2014 | Valensole | VM14 | Puimichel | 14 J30 | 40,5 forte | 121,8424908 | 138,13737 | 5,22527 | 133,39394 | 993,15566  | 135,40369 | 15,20330 |
| 2014 | Valensole | VM14 | Puimichel | 14 J30 | 40,5 forte | 149,3507326 | 109,64242 | 4,42353 | 139,47273 | 1767,62930 | 145,74988 | 8,08700  |
| 2014 | Valensole | VM14 | Puimichel | 14 J30 | 40,5 forte | 119,6062271 | 111,74949 | 4,67823 | 127,89091 | 1358,67812 | 137,64781 | 12,07349 |
| 2014 | Valensole | VM14 | Puimichel | 14 J30 | 40,5 forte | 111,496337  | 108,78788 | 4,41552 | 116,32727 | NA         | 131,06464 | 11,96337 |
| 2014 | Valensole | VM14 | Puimichel | 14 J30 | 40,5 forte | 96,56868132 | 180,78788 | 4,65247 | 123,67273 | NA         | 131,28786 | 10,86470 |
| 2014 | Valensole | VM14 | Puimichel | 14 J30 | 40,5 forte | 136,7399267 | 115,25455 | 4,25962 | 122,70303 | NA         | 145,59208 | 16,40385 |
| 2014 | Valensole | VM14 | Puimichel | 14 J30 | 40,5 forte | 149,9752747 | 96,59394  | 5,04224 | 141,62121 | NA         | 159,18264 | 16,19643 |
| 2014 | Valensole | VM14 | Puimichel | 14 J30 | 40,5 forte | 108,7481685 | 115,60404 | NA      | NA        | NA         | 143,36163 | 12,26786 |
| 2014 | Valensole | VM14 | Puimichel | 8 J30  | 46,8 forte | 111,6959707 | 169,10303 | 4,81250 | 134,90303 | 796,53017  | 140,12961 | 7,17720  |
| 2014 | Valensole | VM14 | Puimichel | 8 J30  | 46,8 forte | 125,6364469 | 152,05455 | 4,88118 | 140,02424 | 1082,86662 | 135,82786 | 11,60302 |
| 2014 | Valensole | VM14 | Puimichel | 8 J30  | 46,8 forte | 128,2628205 | 151,32121 | 4,65728 | 152,62424 | 1180,94618 | 141,36704 | 13,70238 |
| 2014 | Valensole | VM14 | Puimichel | 8 J30  | 46,8 forte | 122,6785714 | 127,77374 | 4,99966 | 153,39394 | 927,43052  | 130,83741 | 9,72848  |
| 2014 | Valensole | VM14 | Puimichel | 8 J30  | 46,8 forte | 125,967033  | 240,37172 | 5,75653 | 124,32121 | 1117,59931 | 104,22301 | 8,00824  |

|                |      |           |        |             |             |           |         |           |            |           |          |
|----------------|------|-----------|--------|-------------|-------------|-----------|---------|-----------|------------|-----------|----------|
| 2014 Valensole | VM14 | Puimichel | 8 J30  | 46,8 forte  | 127,8827839 | 167,13131 | 4,25172 | 121,62424 | 932,88282  | 119,21007 | 6,14973  |
| 2014 Valensole | VM14 | Puimichel | 8 J30  | 46,8 forte  | 114,9340659 | 136,27879 | 4,54556 | 126,19394 | 1066,75353 | 147,59642 | 7,37683  |
| 2014 Valensole | VM14 | Puimichel | 8 J30  | 46,8 forte  | 112,510989  | 105,24242 | 4,97115 | 126,03636 | NA         | 142,01297 | 7,72894  |
| 2014 Valensole | VM14 | Puimichel | 8 J30  | 46,8 forte  | 109,529304  | 150,33939 | NA      | 122,20303 | NA         | 135,58481 | 9,83883  |
| 2014 Valensole | VM14 | Puimichel | 8 J30  | 46,8 forte  | 132,8809524 | 159,42626 | NA      | 133,26061 | NA         | 143,54321 | 7,53068  |
| 2014 Valensole | VP14 | Roumoules | 7 J30  | 15,4 faible | 92,93589744 | 88,84848  | 4,34066 | 114,81818 | 893,90074  | 151,66090 | 14,20559 |
| 2014 Valensole | VP14 | Roumoules | 7 J30  | 15,4 faible | 130,5128205 | 106,63636 | 5,75000 | 137,47879 | 1046,03978 | 146,79927 | 13,83745 |
| 2014 Valensole | VP14 | Roumoules | 7 J30  | 15,4 faible | 139,5009158 | 128,37172 | 5,47115 | 117,37576 | 918,96069  | 149,55663 | 11,80838 |
| 2014 Valensole | VP14 | Roumoules | 7 J30  | 15,4 faible | 97,23717949 | 152,11717 | 4,54224 | 114,71515 | 1011,32616 | 150,55728 | 7,62569  |
| 2014 Valensole | VP14 | Roumoules | 7 J30  | 15,4 faible | 107,1355311 | 137,15960 | 5,60783 | 127,12727 | 1002,24765 | 155,28012 | 10,99405 |
| 2014 Valensole | VP14 | Roumoules | 7 J30  | 15,4 faible | 102,7445055 | 122,26263 | 5,36230 | 132,49091 | 534,34933  | 143,29821 | 10,43956 |
| 2014 Valensole | VP14 | Roumoules | 7 J30  | 15,4 faible | 122,8937729 | 138,99798 | 5,84135 | 118,75758 | 942,17079  | 140,26085 | 14,10852 |
| 2014 Valensole | VP14 | Roumoules | 7 J30  | 15,4 faible | 123,5521978 | 149,47071 | 5,17273 | 127,65455 | NA         | 147,09614 | 11,28846 |
| 2014 Valensole | VP14 | Roumoules | 7 J30  | 15,4 faible | 125,0796703 | 93,47273  | 6,05174 | 133,76970 | NA         | 144,26080 | 9,71886  |
| 2014 Valensole | VP14 | Roumoules | 7 J30  | 15,4 faible | 115,7884615 | 90,53939  | NA      | 120,86061 | NA         | 130,66856 | NA       |
| 2014 Valensole | VP14 | Roumoules | 9 J30  | 15,9 faible | 119,6584249 | 88,09697  | 7,66072 | 103,12727 | 1111,68215 | 132,71393 | 8,95696  |
| 2014 Valensole | VP14 | Roumoules | 9 J30  | 15,9 faible | 148,3489011 | 58,16162  | 6,49622 | 118,89091 | 1340,02695 | 121,54708 | 6,62431  |
| 2014 Valensole | VP14 | Roumoules | 9 J30  | 15,9 faible | 149,6080586 | 111,94343 | 6,84169 | 121,36364 | 749,17853  | 138,39801 | 8,78297  |
| 2014 Valensole | VP14 | Roumoules | 9 J30  | 15,9 faible | 108,0705128 | 123,13535 | 6,77816 | 125,58182 | 677,16517  | 113,36303 | 7,99130  |
| 2014 Valensole | VP14 | Roumoules | 9 J30  | 15,9 faible | 114,5961538 | 123,29697 | 7,18785 | 111,50303 | 1139,06371 | 127,16243 | 9,73397  |
| 2014 Valensole | VP14 | Roumoules | 9 J30  | 15,9 faible | 116,3672161 | 73,97576  | 7,12546 | 109,83030 | 1335,48257 | 129,62240 | 10,32418 |
| 2014 Valensole | VP14 | Roumoules | 9 J30  | 15,9 faible | 133,9871795 | 82,68485  | 6,54052 | 118,12121 | 1187,36159 | 138,80414 | 7,78159  |
| 2014 Valensole | VP14 | Roumoules | 9 J30  | 15,9 faible | 105,264652  | NA        | 6,43040 | 130,56364 | 1400,89663 | 138,16463 | 13,11470 |
| 2014 Valensole | VP14 | Roumoules | 9 J30  | 15,9 faible | 102,6272894 | NA        | 8,03572 | NA        | NA         | 137,32493 | 9,76053  |
| 2014 Valensole | VP14 | Roumoules | 9 J30  | 15,9 faible | 162,4148352 | NA        | NA      | NA        | NA         | 113,54474 | 7,10119  |
| 2014 Valensole | VP14 | Roumoules | 14 J30 | 20,0 faible | 134,8956044 | 117,21818 | 8,74348 | 123,00909 | 1738,83642 | 157,89033 | 7,25092  |
| 2014 Valensole | VP14 | Roumoules | 14 J30 | 20,0 faible | 177,9038462 | 132,18182 | 8,98489 | 134,77576 | 1559,28710 | 166,47226 | 9,77976  |
| 2014 Valensole | VP14 | Roumoules | 14 J30 | 20,0 faible | 142,4249084 | 136,71919 | 8,59753 | 126,06667 | 1704,50891 | 154,90221 | 8,12500  |
| 2014 Valensole | VP14 | Roumoules | 14 J30 | 20,0 faible | 169,768315  | 73,87879  | 9,13691 | 144,60909 | 1508,10510 | 171,28511 | 9,15591  |
| 2014 Valensole | VP14 | Roumoules | 14 J30 | 20,0 faible | 165,9450549 | 90,35758  | 9,17583 | 136,73939 | 1218,88213 | 158,02020 | 7,87019  |
| 2014 Valensole | VP14 | Roumoules | 14 J30 | 20,0 faible | 172,7994505 | 142,56970 | 8,73558 | 134,81818 | 1350,51264 | 166,67851 | 10,39354 |
| 2014 Valensole | VP14 | Roumoules | 14 J30 | 20,0 faible | 148,4441392 | 125,72121 | 8,62431 | 136,43030 | 1826,47216 | 177,92804 | 6,40865  |
| 2014 Valensole | VP14 | Roumoules | 14 J30 | 20,0 faible | 155,1858974 | 156,96162 | 8,77129 | 153,54545 | 1425,26878 | 156,92671 | 8,51923  |
| 2014 Valensole | VP14 | Roumoules | 14 J30 | 20,0 faible | 129,3095238 | 115,11919 | 7,23146 | 127,85455 | 1533,56388 | 153,34322 | 8,59821  |
| 2014 Valensole | VP14 | Roumoules | 14 J30 | 20,0 faible | 154,8562271 | NA        | NA      | 129,36364 | NA         | 171,06399 | 9,55563  |
| 2014 Valensole | VP14 | Roumoules | 12 J30 | 24,6 faible | 133,0723443 | 93,77374  | 8,52564 | 152,96970 | 872,90015  | 143,73116 | 11,91850 |
| 2014 Valensole | VP14 | Roumoules | 12 J30 | 24,6 faible | 159,6886447 | 77,07273  | 8,82967 | 136,16364 | 1249,37354 | 135,02919 | 11,37088 |
| 2014 Valensole | VP14 | Roumoules | 12 J30 | 24,6 faible | 146,1620879 | 84,46667  | 8,73626 | 143,44848 | 1224,75737 | 160,74657 | 14,35714 |
| 2014 Valensole | VP14 | Roumoules | 12 J30 | 24,6 faible | 138,793956  | 100,33131 | 8,84776 | 143,61212 | 1082,89916 | 154,01013 | 10,61355 |
| 2014 Valensole | VP14 | Roumoules | 12 J30 | 24,6 faible | 132,2518315 | 108,64848 | 8,41312 | 149,72121 | 1369,45748 | 166,42130 | 13,02564 |
| 2014 Valensole | VP14 | Roumoules | 12 J30 | 24,6 faible | 121,5164835 | 115,01818 | 8,28572 | 135,93333 | 1039,12350 | 150,13845 | 8,78846  |

|                |      |           |        |             |             |           |         |           |            |           |          |
|----------------|------|-----------|--------|-------------|-------------|-----------|---------|-----------|------------|-----------|----------|
| 2014 Valensole | VP14 | Roumoules | 12 J30 | 24,6 faible | 123,5192308 | 99,15758  | 7,93235 | 118,76970 | 895,76781  | 148,36192 | 9,20147  |
| 2014 Valensole | VP14 | Roumoules | 12 J30 | 24,6 faible | 125,4304029 | 102,30707 | 7,98352 | 127,07879 | 1202,15578 | 153,15092 | 8,32875  |
| 2014 Valensole | VP14 | Roumoules | 12 J30 | 24,6 faible | 137,7266484 | NA        | 7,27026 | 140,95152 | 1524,68826 | 154,49726 | 12,87866 |
| 2014 Valensole | VP14 | Roumoules | 12 J30 | 24,6 faible | 112,6602564 | NA        | 8,85852 | 124,98788 | 727,62934  | 136,39604 | 10,02930 |
| 2014 Valensole | VP14 | Roumoules | 6 J30  | 27,5 faible | 188,4835165 | 159,33737 | 9,60371 | 151,61818 | 1050,28636 | 129,96581 | 22,30907 |
| 2014 Valensole | VP14 | Roumoules | 6 J30  | 27,5 faible | 142,8223443 | 168,93939 | 7,41449 | 143,73333 | 963,65482  | 119,75692 | 9,83288  |
| 2014 Valensole | VP14 | Roumoules | 6 J30  | 27,5 faible | 156,9972527 | 219,53939 | 9,22253 | 138,11515 | 1053,50240 | 120,71370 | 9,73993  |
| 2014 Valensole | VP14 | Roumoules | 6 J30  | 27,5 faible | 144,492674  | 144,07273 | 8,73146 | 156,55152 | 422,28155  | 129,34705 | 26,01007 |
| 2014 Valensole | VP14 | Roumoules | 6 J30  | 27,5 faible | 132,1172161 | 175,72121 | 9,07418 | 150,13636 | 1545,54937 | 121,08206 | 8,36538  |
| 2014 Valensole | VP14 | Roumoules | 6 J30  | 27,5 faible | 144,8901099 | 168,10909 | 8,87454 | 133,15152 | 992,62646  | 129,62145 | 8,99084  |
| 2014 Valensole | VP14 | Roumoules | 6 J30  | 27,5 faible | 134,8351648 | 232,16970 | 9,14148 | 144,83636 | 778,07886  | 129,41880 | 8,01374  |
| 2014 Valensole | VP14 | Roumoules | 6 J30  | 27,5 faible | 193,9642857 | 109,95556 | 8,85989 | 159,99394 | 727,47944  | 108,16607 | 9,01053  |
| 2014 Valensole | VP14 | Roumoules | 6 J30  | 27,5 faible | 133,6501832 | 147,30909 | 7,88874 | 144,24242 | 847,43649  | 126,54224 | 6,75343  |
| 2014 Valensole | VP14 | Roumoules | 6 J30  | 27,5 faible |             | 157,5 NA  | NA      | 134,47879 | 600,08980  | 116,19776 | 8,28022  |
| 2014 Valensole | VP14 | Roumoules | 10 J30 | 39,8 forte  | 183,4038462 | 124,06869 | 7,56799 | 143,62424 | 963,65672  | 134,63695 | 8,94551  |
| 2014 Valensole | VP14 | Roumoules | 10 J30 | 39,8 forte  | 164,6684982 | 100,24242 | 8,14973 | 149,55758 | 1400,73887 | 131,49704 | 10,69689 |
| 2014 Valensole | VP14 | Roumoules | 10 J30 | 39,8 forte  | 143,5448718 | 81,93131  | 9,45215 | 132,21818 | 986,08075  | 115,15356 | 9,40018  |
| 2014 Valensole | VP14 | Roumoules | 10 J30 | 39,8 forte  | 158,739011  | 70,57576  | 8,51763 | 141,20000 | 1250,89810 | 134,37500 | 9,91300  |
| 2014 Valensole | VP14 | Roumoules | 10 J30 | 39,8 forte  | 158,21337   | 84,30303  | 7,73008 | 141,03030 | 1366,24947 | 125,45032 | 11,10302 |
| 2014 Valensole | VP14 | Roumoules | 10 J30 | 39,8 forte  | 157,2582418 | 112,20606 | 7,75183 | 144,00606 | 1060,95631 | 124,86707 | 8,46291  |
| 2014 Valensole | VP14 | Roumoules | 10 J30 | 39,8 forte  | 140,0741758 | 102,20000 | 8,80952 | 144,77576 | 1372,91392 | 119,68716 | 11,87294 |
| 2014 Valensole | VP14 | Roumoules | 10 J30 | 39,8 forte  | 150,4358974 | NA        | 8,10508 | 150,75758 | 732,31583  | 125,68954 | 11,22253 |
| 2014 Valensole | VP14 | Roumoules | 10 J30 | 39,8 forte  | 121,9313187 | NA        | NA      | 147,93939 | 1219,47364 | 118,42373 | 8,80586  |
| 2014 Valensole | VP14 | Roumoules | 10 J30 | 39,8 forte  | 119,3992674 | NA        | NA      | 124,19394 | 1080,04679 | 131,55613 | NA       |
| 2014 Valensole | VP14 | Roumoules | 18 J30 | 41,6 forte  | 205,8241758 | 107,60404 | 9,36081 | 156,98182 | 1338,97659 | 131,47673 | 11,33471 |
| 2014 Valensole | VP14 | Roumoules | 18 J30 | 41,6 forte  | 131,2271062 | 121,91515 | 7,11630 | 129,05455 | 827,73215  | 129,62193 | 13,14057 |
| 2014 Valensole | VP14 | Roumoules | 18 J30 | 41,6 forte  | 136,6547619 | 96,38182  | 6,25275 | 139,63030 | 1420,43278 | 129,75035 | 9,08700  |
| 2014 Valensole | VP14 | Roumoules | 18 J30 | 41,6 forte  | 111,2673993 | 137,28485 | 8,08356 | 123,25455 | 1397,66222 | 135,69987 | 7,79350  |
| 2014 Valensole | VP14 | Roumoules | 18 J30 | 41,6 forte  | 155,260989  | 111,68081 | 7,00550 | 149,99394 | 1548,68221 | 120,66426 | 7,41392  |
| 2014 Valensole | VP14 | Roumoules | 18 J30 | 41,6 forte  | 123,5897436 | 137,26465 | 7,82143 | 127,82424 | 1459,29040 | 120,43900 | 11,15797 |
| 2014 Valensole | VP14 | Roumoules | 18 J30 | 41,6 forte  | 176,9871795 | 148,64848 | 8,60646 | 139,43636 | 894,90978  | 121,35505 | 7,40179  |
| 2014 Valensole | VP14 | Roumoules | 18 J30 | 41,6 forte  | 156,2527473 | 132,74747 | 8,68887 | 136,18182 | 1200,84438 | 132,98037 | 13,67262 |
| 2014 Valensole | VP14 | Roumoules | 18 J30 | 41,6 forte  | 177,9148352 | 103,39394 | NA      | 146,01212 | 1576,21207 | 115,84401 | 12,19734 |
| 2014 Valensole | VP14 | Roumoules | 18 J30 | 41,6 forte  | 169,9065934 | NA        | NA      | 132,30303 | 1506,42075 | 122,31488 | NA       |
| 2014 Valensole | VP14 | Roumoules | 11 J30 | 41,6 forte  | 127,209707  | 101,98384 | 7,46429 | 131,49091 | 1333,65228 | 160,01392 | 8,62912  |
| 2014 Valensole | VP14 | Roumoules | 11 J30 | 41,6 forte  | 173,0027473 | 90,78788  | 5,34203 | 129,93333 | 897,92077  | 171,71724 | 8,70192  |
| 2014 Valensole | VP14 | Roumoules | 11 J30 | 41,6 forte  | 81,51923077 | 110,45455 | 6,85955 | 115,55758 | 1016,87791 | 165,13478 | 6,85646  |
| 2014 Valensole | VP14 | Roumoules | 11 J30 | 41,6 forte  | 100,4871795 | 86,09091  | 6,83562 | 109,47273 | 1039,40623 | 140,36476 | 5,35211  |
| 2014 Valensole | VP14 | Roumoules | 11 J30 | 41,6 forte  | 78,39010989 | 83,56364  | 7,15728 | 135,75758 | 745,63879  | 160,57990 | 8,55769  |
| 2014 Valensole | VP14 | Roumoules | 11 J30 | 41,6 forte  | 194,9935897 | 92,30909  | 6,73077 | 139,76364 | 1110,56997 | 152,09290 | NA       |
| 2014 Valensole | VP14 | Roumoules | 11 J30 | 41,6 forte  | 90,03388278 | 86,80808  | 7,43579 | 123,18182 | 639,49339  | 147,72277 | NA       |

|      |           |      |           |        |            |             |           |         |           |            |           |          |
|------|-----------|------|-----------|--------|------------|-------------|-----------|---------|-----------|------------|-----------|----------|
| 2014 | Valensole | VP14 | Roumoules | 11 J30 | 41,6 forte | 164,5457875 | NA        | 6,95078 | 132,22424 | 785,52418  | 162,60658 | NA       |
| 2014 | Valensole | VP14 | Roumoules | 11 J30 | 41,6 forte | 156,6428571 | NA        | NA      | 147,76364 | 681,93175  | 165,36490 | NA       |
| 2014 | Valensole | VP14 | Roumoules | 11 J30 | 41,6 forte | 154,6639194 | NA        | NA      | 124,32727 | NA         | 161,18760 | NA       |
| 2014 | Valensole | VP14 | Roumoules | 17 J30 | 41,7 forte | 136,3475275 | 148,63030 | 8,27060 | 131,28485 | 1103,77300 | 163,10851 | 9,59272  |
| 2014 | Valensole | VP14 | Roumoules | 17 J30 | 41,7 forte | 173,2225275 | 161,51515 | 9,60749 | 143,51515 | 1205,03382 | 162,08430 | 6,80495  |
| 2014 | Valensole | VP14 | Roumoules | 17 J30 | 41,7 forte | 142,7435897 | 139,70909 | 8,58036 | 135,30909 | 1018,16136 | 165,13448 | 6,41529  |
| 2014 | Valensole | VP14 | Roumoules | 17 J30 | 41,7 forte | 152,2252747 | 187,51515 | 9,15179 | 144,89091 | 1438,51284 | 162,72236 | 11,45238 |
| 2014 | Valensole | VP14 | Roumoules | 17 J30 | 41,7 forte | 147,6552198 | 155,81414 | 9,13233 | 151,24848 | 1208,14174 | 162,97541 | 11,51190 |
| 2014 | Valensole | VP14 | Roumoules | 17 J30 | 41,7 forte | 126,7252747 | 117,52727 | 6,93315 | 127,15152 | 1181,90028 | 163,31261 | 11,08013 |
| 2014 | Valensole | VP14 | Roumoules | 17 J30 | 41,7 forte | 142,8736264 | 155,18788 | 8,41278 | 143,75152 | 1213,68227 | 157,86446 | 9,73764  |
| 2014 | Valensole | VP14 | Roumoules | 17 J30 | 41,7 forte | 149,5613553 | 173,15758 | 8,30701 | 145,34545 | 1079,19086 | 161,79728 | 9,78091  |
| 2014 | Valensole | VP14 | Roumoules | 17 J30 | 41,7 forte | 117,1309524 | 130,54141 | 8,19368 | 132,95758 | 1238,38768 | 174,63658 | 8,73993  |
| 2014 | Valensole | VP14 | Roumoules | 17 J30 | 41,7 forte | 101,4139194 | NA        | 7,22825 | 126,33939 | 1117,70825 | 156,81007 | 11,63965 |
| 2014 | Valensole | VP14 | Roumoules | 15 J30 | 50,2 forte | 104,0586081 | 132,53737 | 6,67010 | NA        | 1129,30670 | 153,51505 | 6,23283  |
| 2014 | Valensole | VP14 | Roumoules | 15 J30 | 50,2 forte | 114,2948718 | 173,15152 | 7,21177 | 119,48485 | 1227,31896 | 165,06036 | 10,80952 |
| 2014 | Valensole | VP14 | Roumoules | 15 J30 | 50,2 forte | 110,4826007 | 201,95960 | 7,96062 | 135,46061 | 1476,11802 | 174,69568 | 17,87042 |
| 2014 | Valensole | VP14 | Roumoules | 15 J30 | 50,2 forte | 117,8324176 | 144,67475 | 6,62741 | 130,20606 | 997,24952  | 164,61228 | 11,95559 |
| 2014 | Valensole | VP14 | Roumoules | 15 J30 | 50,2 forte | 155,5155678 | 169,01414 | 7,87809 | 139,03030 | 954,55189  | 165,39771 | 8,10165  |
| 2014 | Valensole | VP14 | Roumoules | 15 J30 | 50,2 forte | 126,1739927 | 208,29091 | 6,94460 | 130,89091 | 1262,77860 | 167,44185 | 7,14652  |
| 2014 | Valensole | VP14 | Roumoules | 15 J30 | 50,2 forte | 131,8241758 | 175,97980 | 6,88324 | 129,01818 | 819,39918  | 155,15548 | 18,38462 |
| 2014 | Valensole | VP14 | Roumoules | 15 J30 | 50,2 forte | 93,86813187 | 203,42424 | 6,74210 | 136,60303 | 1247,16189 | 156,33904 | 7,85646  |
| 2014 | Valensole | VP14 | Roumoules | 15 J30 | 50,2 forte | 106,2445055 | 128,07879 | NA      | 122,20606 | 821,28687  | 139,84370 | 10,25618 |
| 2014 | Valensole | VP14 | Roumoules | 15 J30 | 50,2 forte | 155,9432234 | 170,61010 | NA      | 131,18182 | 1392,93790 | 166,14645 | 11,96291 |
